# Supplementary material for: Importance of glutamine in synaptic vesicles revealed by functional studies of SLC6A17 and its mutations pathogenic for intellectual disability
Source: eLife. 2023 Jul 13;12:RP86972. doi: 10.7554/eLife.86972 (PMC10393021; doi:10.7554/eLife.86972)
Supplement: Figure 2—figure supplement 1—source data 1. [file elife-86972-fig2-figsupp1-data1.xlsx]

## Sheet: S3A
Male				Female
+/+	+/-	-/-		+/+	+/-	-/-
31	27	25		23	24	23
29	27	30		21	20	20
30	30	25		24	20	19
26	29	29		20	22	14
29	29	26		22	22	23
30	26	25		20	22	24
29	31	31		21	24	21
26	31	32		20	21	24
30	30			23	20	24
28	29			20
	28			23
	30			21
	25			20
	37
	34
	37

## Sheet: S3B
+/+	+/-	-/-
2427.15	2602.67	2224.98
2070.15	3084.46	2346.22
2215.7	1831.99	1716.4
2713.24	2956.77	2017.97
3665.18	2370.42	2039.13
2913.43	2044.41	1750.87
2142.59	1764.66	1940.32
1875.77	3045.17	2164.87
2808.41	2676.52	2608.03
2368.78	2585.62	2609.86
2552.56	2761.32	2644.16
1958.59	1962.14	2093.59
2948.11	2375.3	2394.48
2378.5	2539.25	2255.65
3175.11	2995.64	3261.33
3990.66	2485.31	2627.16
2932.08	2640.17	1864.66
3298.72	2558.17
1836.2	3503.88
2167.78	3105.63
2540.08	2295.57
	2410.69
	2315.22
	1018.34
	2109.92
	2613.71

## Sheet: S3C
+/+	+/-	-/-
0.555446	0.71188	0.835538
0.770236	0.726066	0.667521
0.718086	0.686711	0.642375
0.694568	0.487082	0.680818
0.78334	0.733941	0.876801
0.391808	0.477783	0.740265
0.571227	0.694499	0.423374
0.73479	0.667603	0.718069
0.715984	0.907833	0.495825
0.456506	0.94879	0.825646
0.622851	0.741568	0.413308
0.715984	0.642774	0.311111
0.456506	0.582058	0.833546
0.622851	0.81597	0.495825
0.752728	0.610474	0.825646
0.343236	0.260386	0.413308
0.612237	0.785012	0.311111
0.232695	0.741568	0.833546
0.462847	0.642774	0.543415
0.746108	0.582058	0.76264
0.744806	0.81597
0.57594	0.610474

## Sheet: S3D
+/+	+/-	-/-
10338.2	8164.62	5496.39
11492.5	10390.2	7767.23
9530.14	8772.12	6471.38
8934.4	8442.27	7222.8
8334.99	9511.31	8229.32
9423.88	5928.6	8455.8
5939.55	6362.16	3982.24
4905.2	8672.22	5116.48
5069.22	7852.09	8745.27
7242.49	9819.91	8981.02
7565.64	12226.6	8347.53
7740.35	7019.02	9167.21
7989.5	7590.87	7650.73
7998.48	8368.15	9045.48
10201.4	7990.1	7748.74
8207.33	8023.15	8046.24
10161.3	8307.74	7942.79
8192.35	9076.01	5781.32
5095.85	9793.88	8942.74
9130.95	11921.6	6134.99
9463.64	7644.24	5219.92
5437.62	9147.63	9033.31
7896.66	11252.1	9258.9
7703.37	6040.19	7938.84
9638.08	8164.4	5761.58
9795.79	8858.88	7500.94
10217.9		7138.58
7640.23
6865.97
6716.96
9357.18
7187.03
4930.31

## Sheet: S3E
+/+	+/-	-/-
9.6	9.11	46.2
4.89	4.23	39.1
10.63	9.74	4.94
6.53	0.95	30.75
12.56	14.58	3.6
15.93	0.18	46.42
6	1.75	3.08
4.28	2.47	1.07
1.26	7.35	51.89
14.27	38.61	33.01
0.29	12.53	43.7
0.16	0.4	36.35
4.6	14.4	38.43
3.12	31.67	30.73
3.58	22.61	44.01
19.04	19.77	30.57
10.47	15.12	45.77
0.5	10.63	10.37
1.17	26.06	38.76
6.74	2.93	44.97
0.39	12.69	66.7
0.43	20.62	61.18
0	22.89	41.48
16.29	0.13	57.78
13.69	9.27	52.43
18.75	7.6	25.21
21.61		16.96
17.35
13.97
9.34
2.28
4.2
1.67

## Sheet: S3F
+/+	+/-	-/-
992.97	743.78	3131.47
562.05	439.09	2627.04
1012.62	854.28	60.95
583.73	79.96	2280.72
1047.19	1386.6	168.42
1501.02	10.59	3609.42
356.13	111.39	212.96
210.03	214.14	32.23
63.69	577.44	4005.5
1033.84	3791.86	2964.81
22.05	1531.77	3648.15
12.66	27.85	3332.66
367.71	1092.88	2940.43
249.8	2650.54	2779.77
365.7	1806.36	3409.98
1563	1585.82	2459.7
1063.63	1256.07	3635.53
41.25	964.63	518.64
59.63	2552.32	3410.58
615.36	232.41	2811.08
36.69	1141.01	2878.62
23.25	1115.26	4933.26
0	2571.35	2682.47
990.57	0	4881.57
883.3	762.95	3392.12
1781.4	521.51	1689.8
2171.98		1074.53
748.95
1131.05
490.52
60.89
200.63
25.61
