# Supplementary material for: Importance of glutamine in synaptic vesicles revealed by functional studies of SLC6A17 and its mutations pathogenic for intellectual disability
Source: eLife. 2023 Jul 13;12:RP86972. doi: 10.7554/eLife.86972 (PMC10393021; doi:10.7554/eLife.86972)
Supplement: Figure 2—figure supplement 2—source data 1. [file elife-86972-fig2-figsupp2-data1.xlsx]

## Sheet: Summary
		WT						KO
	Accession	X126.x	X127N.x	X128N.x	X126.y	X127N.y	X128N.y	X129C	X130N	X131	X127C	X130a	X131c
1	A2A432	78.4	71.1279	71.0951	NA	NA	NA	75.7289	58.2721	247.32	NA	NA	NA
2	A2A5R2	111.7	80.8351	85.3516	93.5	90.3332	79.2494	101.593	96.6855	117.319	121.13	103.25	114.244
3	A2A690	106.9	84.2768	89.4785	105.5	98.0232	78.0638	109.145	94.0778	108.758	129.044	105.771	85.9331
4	A2A699	113.9	81.2764	87.9778	NA	NA	NA	106.662	100.296	102.627	NA	NA	NA
5	A2A6Q5	91.1	81.6294	87.884	NA	NA	NA	109.972	113.936	108.652	NA	NA	NA
6	A2A9C3	103.8	99.3672	85.633	116.8	86.4395	64.4756	103.869	95.8831	101.888	164.877	103.25	71.4275
7	A2AAE1	101.7	83.1296	88.1654	89.5	89.4571	91.1049	111.835	92.1721	116.262	139.046	85.4029	107.541
8	A2ACJ2	NA	NA	NA	94	88.0943	85.9067	NA	NA	NA	128.384	112.022	93.3359
9	A2ADY9	25.6	23.827	22.2289	NA	NA	NA	248.085	247.33	39.529	NA	NA	NA
10	A2AF47	97.2	105.015	99.233	NA	NA	NA	95.2819	85.2517	106.749	NA	NA	NA
11	A2AFS3	NA	NA	NA	97.1	80.8911	74.872	NA	NA	NA	150.368	111.417	90.4348
12	A2AG50	89.7	85.5123	88.2592	90.1	86.0502	80.9821	109.041	111.93	108.123	131.792	104.964	108.742
13	A2AGT5	93.5	78.4525	89.1033	101.1	85.0768	78.2462	114.214	105.311	113.197	123.878	108.291	105.741
14	A2AHC3	96.6	88.7775	87.415	70.7	68.8207	124.3	104.076	101.199	114.254	106.401	82.1764	144.055
15	A2AHG0	102.6	88.6892	93.9806	NA	NA	NA	102.524	98.2902	105.27	NA	NA	NA
16	A2AJA9	91.4	81.0116	92.1985	93.9	81.6698	76.5135	101.903	98.7917	128.311	140.036	105.771	106.041
17	A2AJI0	89.2	86.3065	90.604	86.3	90.0412	84.8123	106.662	106.314	113.514	142.344	103.855	95.7368
18	A2ALS5	122.2	77.7465	84.0385	NA	NA	NA	91.1437	95.181	123.766	NA	NA	NA
19	A2AN08	99.6	85.5123	90.7916	86.2	101.722	81.9853	107.386	97.6884	111.4	118.602	105.468	106.941
20	A2AP18	106.8	90.9837	89.4785	82.1	85.0768	69.309	100.662	98.5911	104.741	204.777	99.1158	70.0269
21	A2APF3	NA	NA	NA	165.4	137.641	25.7173	NA	NA	NA	135.199	117.87	25.2097
22	A2APV2	98.4	90.2777	102.328	NA	NA	NA	102.006	96.0837	101.253	NA	NA	NA
23	A2APX8	98.1	90.0129	97.6385	109.4	92.3774	82.2589	101.696	106.013	97.0257	115.854	112.728	88.434
24	A2AQ25	97.9	88.6892	94.1681	NA	NA	NA	107.076	100.396	103.262	NA	NA	NA
25	A2ARS0	98.6	94.0723	94.3557	105.4	92.9614	83.1708	105.317	94.9804	103.367	137.288	100.83	82.9319
26	A2ASS6	102.6	87.542	90.7916	81.1	92.1827	87.913	98.6959	99.4938	112.985	134.21	94.9818	111.543
27	A2AWA9	116.8	75.2755	82.8192	94.5	94.5189	85.9067	116.49	79.1336	124.823	98.5964	120.088	105.441
28	A2AWP8	NA	NA	NA	97.7	97.3418	92.9288	NA	NA	NA	99.6956	96.1917	114.244
29	A2AX52	NA	NA	NA	98	82.8379	82.5324	NA	NA	NA	134.21	99.2166	105.841
30	A2CG49	100.7	82.6001	90.3226	80.7	92.8641	88.369	104.593	103.405	111.188	139.376	97.9058	103.24
31	A2RSJ4	104	81.8941	82.8192	103.8	97.5365	95.2087	99.9373	99.3935	125.88	88.484	101.032	110.843
32	A2RT62	137.7	80.9234	72.4082	96.3	87.2183	80.7085	88.5573	93.0748	121.652	124.097	126.037	87.6337
33	A3KFX0	98.7	92.1309	91.8233	NA	NA	NA	106.869	97.6884	103.896	NA	NA	NA
34	A6H584	NA	NA	NA	87.9	98.6073	76.1487	NA	NA	NA	122.778	118.677	98.0377
35	A6H5Z3	99.4	83.8356	91.073	NA	NA	NA	110.697	101.6	106.01	NA	NA	NA
36	A9Z1V5	96.6	91.3367	101.765	91.1	87.997	80.7997	102.834	96.4849	101.253	139.266	103.451	100.539
37	B0F2B4	109.7	92.2191	77.473	72.8	82.5459	84.3564	99.7304	97.2872	116.05	156.963	101.737	106.341
38	B0V2N1	97.6	90.4542	101.953	93.8	87.705	83.9916	105.938	99.5941	94.5947	137.727	108.896	90.7349
39	B1AR13	NA	NA	NA	89.8	85.1741	68.1235	NA	NA	NA	164.327	105.266	94.0362
40	B1AVZ0	NA	NA	NA	80.2	68.8207	83.4444	NA	NA	NA	137.507	119.887	113.444
41	B1AXP6	NA	NA	NA	104.6	91.8907	81.5293	NA	NA	NA	128.164	105.569	90.2347
42	B1AXV0	97.9	95.4843	98.3888	92	92.1827	80.8909	101.489	104.208	91.9524	123.108	116.156	97.3374
43	B1AY10	81.5	86.2183	96.044	NA	NA	NA	121.042	89.9656	118.058	NA	NA	NA
44	B1AY13	108.2	101.75	87.5088	89.8	97.2445	68.4882	92.6955	86.1544	113.831	141.794	111.82	95.3367
45	B1AZ99	97.6	106.515	92.7612	NA	NA	NA	98.6959	99.1929	93.5378	NA	NA	NA
46	B1AZA5	94.6	87.895	100.171	93.4	85.2714	81.3469	109.869	104.007	94.172	139.486	103.754	100.038
47	B1AZP2	90.9	81.8059	91.3544	88.7	88.9704	83.718	114.938	103.907	110.343	145.751	109.199	87.1335
48	B2RQC6	96.8	88.8657	91.8233	100.2	101.528	72.7745	108.834	100.798	104.53	124.537	105.771	97.6376
49	B2RR83	97.3	88.0715	89.2909	86.4	92.3774	82.9884	105.834	103.907	107.701	154.215	101.233	87.0335
50	B2RRE7	111.6	86.2183	89.8537	NA	NA	NA	101.075	96.3846	106.749	NA	NA	NA
51	B2RSH2	95.6	90.0129	102.328	98.5	86.4395	88.4602	107.386	106.214	88.2532	120.03	116.459	91.1351
52	B2RUJ5	115	84.4533	80.0054	NA	NA	NA	106.869	88.8624	118.481	NA	NA	NA
53	B2RXA1	NA	NA	NA	87.7	89.6518	75.6015	NA	NA	NA	151.797	105.67	94.3363
54	B2RXC1	95.5	94.5136	98.0137	93.4	90.1385	89.1898	104.903	94.6795	102.522	119.371	109.4	99.0381
55	B2RXC5	NA	NA	NA	105.1	101.528	84.7212	NA	NA	NA	122.998	112.728	74.0285
56	B2RXS4	97.6	89.7482	101.484	100.9	90.1385	82.7148	104.179	98.7917	98.5054	126.845	109.602	91.7353
57	B9EHT4	94.8	94.3371	102.234	85.4	87.3156	90.4665	108.421	89.8653	100.408	127.505	105.569	105.04
58	B9EJ80	94.1	84.5416	96.4192	NA	NA	NA	111.317	102.202	103.262	NA	NA	NA
59	B9EJ86	96.1	94.0723	93.2302	99.1	81.0857	75.5103	104.696	101.6	100.831	132.451	105.871	109.442
60	B9EJA2	99.5	84.8946	93.9806	94.1	90.6252	81.9853	104.282	96.6855	112.985	127.285	105.266	102.84
61	B9EJI9	106.1	97.2493	94.8247	NA	NA	NA	111.835	80.5378	99.5623	NA	NA	NA
62	B9EKR1	95.3	81.4529	107.487	96.3	86.9262	72.1361	100.662	104.007	102.31	125.307	122.609	99.6383
63	C0HK80	88.6	90.8072	92.1047	NA	NA	NA	113.593	110.526	95.4403	NA	NA	NA
64	C0HKE4	88.4	64.774	62.1847	86.7	83.714	81.5293	168.942	124.869	88.8874	147.07	93.8726	111.043
65	D3YTS9	95.1	98.22	102.516	NA	NA	NA	105.11	105.712	81.7003	NA	NA	NA
66	D3YVE8	96.1	89.3952	103.735	97.7	99.1913	86.1803	105.834	102.302	92.5866	102.883	119.584	93.8361
67	D3YVF0	94.2	85.6888	95.3875	81.2	91.2093	86.6363	110.179	108.32	97.7655	140.365	103.451	99.8384
68	D3YZI9	NA	NA	NA	94.2	87.0236	83.5356	NA	NA	NA	124.097	118.273	94.6364
69	D3YZP9	NA	NA	NA	85.1	90.3332	90.0105	NA	NA	NA	127.175	114.644	94.0362
70	D3YZU1	94.9	85.9535	92.7612	111.5	94.9083	89.7369	110.076	100.296	108.229	109.698	96.9984	96.5371
71	D3Z5L6	113.6	100.867	70.7199	NA	NA	NA	80.2809	104.809	121.124	NA	NA	NA
72	D3Z7P3	134.6	84.3651	82.6316	103.6	103.085	93.7496	82.7639	81.7413	127.148	112.776	103.855	82.1316
73	E9PUL5	95.5	93.7194	101.672	92.2	94.8109	90.2841	105.627	104.208	88.7817	115.634	102.947	104.24
74	E9PV86	95.5	87.189	97.5447	104.5	81.1831	73.3216	110.076	99.8949	101.253	135.749	99.6199	109.442
75	E9PVA8	96.8	91.5132	91.7295	106	87.8023	74.1424	102.42	94.479	114.782	137.507	100.427	97.8376
76	E9PY46	NA	NA	NA	121.9	89.0678	67.7587	NA	NA	NA	113.216	118.979	91.3351
77	E9PZJ8	NA	NA	NA	85.6	93.1561	76.4223	NA	NA	NA	149.488	102.947	96.8372
78	E9Q3L2	101.4	85.424	91.9171	99.2	94.5189	91.7432	107.283	99.2932	106.855	98.8163	114.442	99.7384
79	E9Q401	96.7	92.9251	96.1378	94.6	84.3954	89.6457	105.42	100.597	98.6111	116.733	111.316	103.84
80	E9Q4P1	78.6	85.424	81.7875	89.5	91.5987	78.5198	115.352	116.745	115.839	123.658	122.004	96.8372
81	E9Q555	112.7	85.777	107.112	NA	NA	NA	102.524	85.4523	96.7086	NA	NA	NA
82	E9Q557	71.9	75.099	86.3833	81.8	122.845	65.0228	94.5577	123.665	143.953	126.186	106.275	100.539
83	E9Q5C9	91.5	75.3638	94.4495	NA	NA	NA	96.6268	133.193	101.57	NA	NA	NA
84	E9Q634	103.7	93.1899	82.8192	NA	NA	NA	95.3853	108.922	107.384	NA	NA	NA
85	E9Q6P5	102.3	87.0125	93.4178	97.3	92.28	79.2494	106.765	105.512	96.3915	129.044	121.903	82.8319
86	E9Q7T7	96.4	105.28	92.5737	NA	NA	NA	94.0404	93.0748	107.701	NA	NA	NA
87	E9Q7X7	98.9	100.603	84.1323	97.5	86.0502	61.7397	100.248	106.715	99.4566	186.97	101.032	76.3294
88	E9Q8I9	100	95.1313	86.7585	99.1	91.3066	82.1677	110.593	96.9864	101.465	135.529	102.04	92.6356
89	E9Q942	NA	NA	NA	59	79.3336	102.778	NA	NA	NA	158.172	81.3697	122.347
90	E9Q9R9	100.1	86.3065	87.5088	NA	NA	NA	100.868	102.804	114.993	NA	NA	NA
91	E9QA62	NA	NA	NA	113.6	89.5545	79.7054	NA	NA	NA	102.444	120.693	94.1362
92	F6SEU4	95.8	87.6302	93.8868	96.3	97.1471	81.8029	106.972	101.199	106.221	122.778	112.123	91.3351
93	F6W8I0	113.9	93.1016	92.7612	NA	NA	NA	94.4542	85.4523	111.188	NA	NA	NA
94	F8VPU2	92.5	90.1894	98.3888	121.5	86.0502	75.8751	105.317	107.517	96.6029	123.987	108.594	86.3332
95	F8VQB6	102.9	85.3358	93.9806	NA	NA	NA	94.7646	99.6944	115.416	NA	NA	NA
96	G3X982	NA	NA	NA	95.7	88.1917	93.8408	NA	NA	NA	104.422	94.1751	122.347
97	G3X9J0	112.9	99.1907	79.9116	NA	NA	NA	103.869	97.4878	97.2371	NA	NA	NA
98	G3X9K3	117.9	84.6298	76.9102	NA	NA	NA	96.7303	96.3846	121.229	NA	NA	NA
99	G3XA57	92.7	96.5433	99.7957	98.4	86.7316	86.0891	103.765	97.9893	98.8224	126.186	111.417	92.6356
100	G5E829	92.3	87.542	98.0137	105.6	91.8907	90.2841	105.731	107.217	100.408	104.202	115.551	91.5352
101	G5E872	77.3	79.5997	86.7585	NA	NA	NA	109.662	122.361	118.481	NA	NA	NA
102	G5E8K5	104.7	87.895	95.1061	98.3	93.0588	78.2462	105.007	99.7946	98.5054	133.111	104.46	95.6368
103	O08529	118.2	73.9518	77.942	75.6	83.3246	92.8376	91.2471	91.5704	143.108	142.344	113.635	94.8365
104	O08530	89.3	92.5721	108.237	NA	NA	NA	107.593	89.2636	102.944	NA	NA	NA
105	O08532	95.7	91.6014	99.1392	101.8	86.2449	86.3627	104.282	102.202	97.3428	119.261	114.039	93.4359
106	O08539	115.3	96.2785	106.08	101.9	94.4216	97.215	92.5921	84.2487	94.0663	106.95	99.9224	98.1377
107	O08547	95.7	88.6892	94.5433	102.3	92.0854	79.7966	120.214	100.497	91.424	121.349	110.005	96.137
108	O08553	115	80.7469	89.0095	100.1	93.1561	86.6363	101.903	97.1869	108.969	118.602	107.686	94.4363
109	O08576	104.6	95.2196	98.6702	93.2	95.7844	79.7966	99.2132	91.8713	100.196	110.138	126.743	94.9365
110	O08579	101	90.9837	97.3571	95.1	89.9438	71.6801	104.386	98.892	97.8712	164.108	93.4693	91.9354
111	O08581	105.9	87.189	90.7916	NA	NA	NA	103.351	94.2784	110.66	NA	NA	NA
112	O08582	103.3	99.3672	86.6647	99.5	91.8907	75.328	97.1441	95.0807	108.969	144.432	102.141	90.8349
113	O08585	102.8	81.1881	82.0689	105.7	92.8641	89.6457	99.1097	106.214	122.603	101.674	115.652	93.3359
114	O08586	113.6	91.5132	77.942	NA	NA	NA	99.7304	90.6677	119.01	NA	NA	NA
115	O08599	110.7	94.3371	99.7019	103	95.395	101.228	93.2128	94.479	96.92	98.8163	93.9735	105.04
116	O08638	NA	NA	NA	95.1	86.2449	90.5577	NA	NA	NA	130.912	107.182	91.7353
117	O08641	96.2	89.4835	89.2909	NA	NA	NA	102.006	92.2724	123.237	NA	NA	NA
118	O08688	87.5	96.3668	97.6385	82.1	88.3864	84.63	104.282	110.025	93.7492	127.725	104.762	114.144
119	O08709	144.2	57.0082	55.9944	114.4	116.323	71.2241	76.2462	81.3402	186.759	110.468	104.863	83.6322
120	O08739	99.3	85.0711	85.9144	NA	NA	NA	111.938	96.8861	114.042	NA	NA	NA
121	O08749	NA	NA	NA	93.1	113.695	86.6363	NA	NA	NA	112.226	98.0067	95.7368
122	O08756	NA	NA	NA	93.2	90.0412	85.3595	NA	NA	NA	126.845	94.6793	111.243
123	O08788	93.3	85.8653	88.9157	91.5	94.3242	77.2431	111.214	103.506	109.814	133.331	109.098	97.4375
124	O08795	95	94.8666	102.047	94	88.4837	84.9035	102.627	107.016	87.5134	134.32	108.291	92.4356
125	O08807	102.4	84.7181	99.5143	NA	NA	NA	96.9372	101.801	105.904	NA	NA	NA
126	O08808	119.3	77.57	80.4744	NA	NA	NA	101.489	89.063	126.831	NA	NA	NA
127	O08842	92	90.8072	98.6702	NA	NA	NA	110.283	104.408	94.3834	NA	NA	NA
128	O08914	102.2	94.1606	95.8564	95.1	87.997	84.3564	104.179	98.6914	94.8061	122.009	109.3	102.74
129	O08915	124.1	81.0999	87.9778	NA	NA	NA	87.0055	84.349	128.945	NA	NA	NA
130	O08917	97	91.2484	95.9502	115.3	91.404	73.2304	104.386	104.709	97.2371	126.516	110.106	86.1331
131	O08919	97.4	98.1318	98.1074	93.7	88.4837	90.1017	100.972	98.5911	96.0744	122.449	104.359	101.839
132	O08967	NA	NA	NA	88.7	87.5103	79.8878	NA	NA	NA	132.561	114.341	99.9384
133	O08989	96.4	87.6302	96.7006	97.5	83.2273	77.4255	108.524	102.603	99.4566	146.96	109.501	89.8346
134	O09005	94.2	85.0711	99.7957	NA	NA	NA	109.766	104.609	97.9769	NA	NA	NA
135	O09061	95.5	87.3655	92.0109	102.4	96.6604	67.1203	110.593	121.659	83.8141	113.875	107.989	114.044
136	O09110	NA	NA	NA	91.9	94.4216	80.1613	NA	NA	NA	130.692	103.956	101.239
137	O09111	NA	NA	NA	102	95.2003	80.6173	NA	NA	NA	117.942	113.333	92.2355
138	O09114	87.8	81.0999	90.604	85	85.5635	81.3469	106.972	108.22	118.798	130.033	106.476	114.144
139	O09117	98.4	96.0138	102.422	NA	NA	NA	98.9028	101.6	91.6354	NA	NA	NA
140	O09167	85.3	84.5416	98.764	102.1	82.1565	114.725	113.593	113.736	95.4403	97.3873	84.0921	115.644
141	O09173	NA	NA	NA	122.6	132.093	54.7176	NA	NA	NA	98.0468	91.2511	101.939
142	O35075	90.4	130.607	73.4399	NA	NA	NA	97.9717	80.7384	114.254	NA	NA	NA
143	O35083	98.8	90.3659	102.141	97.4	84.3954	87.6394	106.869	100.898	90.8955	119.041	110.005	102.439
144	O35089	NA	NA	NA	93	102.209	79.7966	NA	NA	NA	132.671	96.6959	97.9377
145	O35098	103.4	84.9828	93.793	NA	NA	NA	105.731	98.9923	105.058	NA	NA	NA
146	O35099	137.8	66.7155	69.6882	NA	NA	NA	89.9022	82.1425	151.563	NA	NA	NA
147	O35114	97.7	90.0129	100.265	100.3	77.9708	72.1361	104.903	102.603	94.7004	163.448	105.569	87.0335
148	O35127	97.5	85.9535	90.7916	91.1	94.5189	90.5577	99.4201	101.801	116.896	116.623	116.459	91.035
149	O35129	NA	NA	NA	108.2	91.404	80.6173	NA	NA	NA	128.714	102.544	90.7349
150	O35130	108.3	86.9243	93.5116	NA	NA	NA	90.2126	105.913	106.327	NA	NA	NA
151	O35136	97.3	90.5424	101.578	97.7	90.2359	100.772	106.041	107.217	87.0906	118.492	85.5038	106.441
152	O35143	NA	NA	NA	47.4	97.3418	171.905	NA	NA	NA	79.2509	47.4909	145.056
153	O35153	101.3	90.4542	83.2882	NA	NA	NA	97.5579	98.5911	121.441	NA	NA	NA
154	O35188	96	95.9256	95.4812	90.5	84.6874	63.4725	102.834	96.0837	103.79	154.874	115.45	97.5375
155	O35226	NA	NA	NA	100.5	114.766	71.5889	NA	NA	NA	112.446	107.989	93.8361
156	O35239	97.9	94.2488	91.8233	107.2	90.9173	86.0891	104.179	99.3935	103.156	108.049	116.862	90.8349
157	O35250	99.5	87.0125	91.8233	NA	NA	NA	112.145	95.7828	105.798	NA	NA	NA
158	O35286	NA	NA	NA	92.6	109.315	83.262	NA	NA	NA	91.122	124.021	97.8376
159	O35295	98.9	84.4533	87.0399	94.7	95.2003	90.9225	102.524	106.414	113.619	110.797	108.09	99.7384
160	O35304	NA	NA	NA	122.6	93.7402	71.5889	NA	NA	NA	119.371	113.232	81.7314
161	O35350	95.6	92.4839	94.8247	99.7	102.598	81.0733	109.041	98.3905	100.408	120.91	104.561	92.4356
162	O35375	NA	NA	NA	106.8	106.2	68.6706	NA	NA	NA	151.027	90.1419	81.9315
163	O35382	100.6	92.7486	84.2261	86.1	90.1385	89.281	107.8	99.4938	106.855	135.199	103.552	97.8376
164	O35405	97.2	93.7194	93.1364	94.8	91.2093	79.523	100.455	103.205	102.839	121.899	118.878	95.5367
165	O35449	NA	NA	NA	84.2	76.316	62.8341	NA	NA	NA	205.876	102.242	79.8307
166	O35454	94.3	92.8369	105.611	106	88.9704	79.3406	111.421	94.9804	90.2614	117.722	117.87	91.6352
167	O35459	NA	NA	NA	112.6	100.749	81.6205	NA	NA	NA	117.392	98.5108	89.9346
168	O35465	93.7	95.7491	98.0137	91.4	85.5635	84.7212	107.696	101.299	93.2207	129.593	111.82	99.0381
169	O35474	97.9	88.8657	95.2937	95.8	85.9528	76.3311	104.593	103.305	101.253	131.682	111.518	101.939
170	O35488	110.2	94.6901	94.3557	NA	NA	NA	93.1093	101.7	95.6517	NA	NA	NA
171	O35490	NA	NA	NA	126.9	127.323	62.8341	NA	NA	NA	67.5996	82.0755	130.45
172	O35491	NA	NA	NA	106.5	91.988	72.8657	NA	NA	NA	112.116	124.928	93.1358
173	O35495	103.2	93.7194	93.9806	76.9	91.5013	79.2494	103.662	88.4612	107.806	133.77	117.265	104.34
174	O35526	99.1	95.3961	98.9516	109.3	96.0764	87.913	101.179	102.202	92.5866	97.9369	105.166	102.139
175	O35544	99.3	91.7779	101.765	NA	NA	NA	96.7303	98.892	101.465	NA	NA	NA
176	O35593	NA	NA	NA	77.2	99.2887	86.0891	NA	NA	NA	130.143	107.787	101.139
177	O35598	86.3	103.78	97.5447	100.4	78.2628	84.9035	122.904	84.8505	93.7492	127.615	108.09	102.94
178	O35604	100.7	84.8946	105.611	NA	NA	NA	111.421	102.101	85.7166	NA	NA	NA
179	O35607	96.4	94.1606	99.3268	NA	NA	NA	105.731	95.5822	98.9281	NA	NA	NA
180	O35609	93	94.6901	97.2633	81.1	84.59	133.329	105.214	101.199	98.7168	109.149	75.5216	111.643
181	O35621	119.1	79.2467	81.0371	NA	NA	NA	89.9022	98.1899	126.725	NA	NA	NA
182	O35623	NA	NA	NA	85.7	83.4219	99.3125	NA	NA	NA	115.963	101.838	113.244
183	O35633	104.3	95.5726	95.575	106	101.82	94.5703	97.351	98.1899	98.8224	98.8163	95.9901	100.639
184	O35643	105.4	91.0719	97.7323	99	101.625	90.3753	96.0061	94.6795	105.587	121.13	80.6639	107.241
185	O35658	NA	NA	NA	122.7	88.9704	68.6706	NA	NA	NA	108.819	123.012	89.7345
186	O35668	103.9	87.2773	81.8813	121.7	106.979	54.8088	109.972	97.9893	111.928	139.376	111.921	70.6272
187	O35678	99	87.895	93.1364	102.5	84.7847	94.2055	106.558	96.184	109.075	114.535	105.468	98.3378
188	O35681	102.7	82.9531	97.6385	102.2	90.1385	87.913	108.524	102.302	97.6598	111.567	104.762	103.44
189	O35682	96.3	103.162	87.9778	75.7	92.8641	114.998	99.0063	101.901	101.148	113.435	94.3768	106.141
190	O35683	NA	NA	NA	90.6	98.1206	77.6991	NA	NA	NA	135.639	106.779	94.1362
191	O35684	NA	NA	NA	96.9	93.2535	76.1487	NA	NA	NA	126.186	104.46	105.541
192	O35710	95.2	79.5114	93.2302	NA	NA	NA	115.456	99.3935	110.554	NA	NA	NA
193	O35841	NA	NA	NA	80.4	101.82	74.3248	NA	NA	NA	124.537	116.761	104.34
194	O35857	NA	NA	NA	93.3	94.7136	80.4349	NA	NA	NA	127.945	119.786	86.0331
195	O35887	97	92.3074	100.452	97.5	98.5099	83.9916	103.455	101.399	95.3346	119.261	113.232	88.5341
196	O35926	NA	NA	NA	124.9	90.9173	69.309	NA	NA	NA	125.856	110.812	81.3313
197	O35927	98.5	89.9247	94.0744	92.8	87.2183	82.8972	102.938	102.402	103.156	134.869	100.023	104.84
198	O35954	108.8	86.0418	95.1061	102.8	90.9173	79.067	103.662	92.3727	105.692	130.912	106.577	92.3355
199	O35963	99.7	92.9251	96.2316	102.6	98.4126	84.2652	102.731	97.5881	101.253	112.996	110.308	91.7353
200	O54692	94	90.5424	87.9778	NA	NA	NA	107.49	103.205	108.546	NA	NA	NA
201	O54734	96.6	92.4839	104.767	106.7	100.165	75.2368	106.972	104.709	83.7084	121.459	113.534	84.9327
202	O54774	99	88.601	88.353	107.1	93.8375	90.1017	103.662	102.703	109.709	106.73	100.83	100.539
203	O54781	NA	NA	NA	102.7	89.6518	79.067	NA	NA	NA	124.097	117.87	88.7341
204	O54784	NA	NA	NA	86.4	81.7671	66.3907	NA	NA	NA	179.386	103.754	90.7349
205	O54818	94.6	96.808	86.1019	NA	NA	NA	97.8683	90.768	125.563	NA	NA	NA
206	O54829	107.1	85.2475	94.9185	98.5	83.0326	77.2431	101.489	99.6944	103.05	151.907	111.316	83.0319
207	O54833	106.5	85.0711	93.4178	82.6	66.7765	85.2683	101.8	98.2902	106.749	143.553	121.702	104.04
208	O54865	127.7	74.1283	76.3475	82.5	85.9528	94.8439	90.8333	90.3668	136.449	131.022	118.576	88.434
209	O54901	95.8	95.0431	94.7309	95.2	100.846	90.9225	102.731	104.809	96.92	101.234	115.854	94.5364
210	O54916	NA	NA	NA	109.9	90.5279	79.1582	NA	NA	NA	117.173	113.333	91.3351
211	O54931	103.2	110.398	103.172	NA	NA	NA	97.1441	74.9212	98.5054	NA	NA	NA
212	O54946	103.8	93.2781	93.1364	98.1	86.8289	83.262	100.765	97.2872	102.205	136.078	103.855	94.5364
213	O54949	96.9	97.6905	91.8233	NA	NA	NA	92.1782	100.497	111.294	NA	NA	NA
214	O54950	101.7	87.0125	80.5682	NA	NA	NA	108.007	97.5881	118.481	NA	NA	NA
215	O54962	90.9	94.6901	108.706	NA	NA	NA	99.1097	103.806	91.6354	NA	NA	NA
216	O54967	99.9	90.7189	85.4454	NA	NA	NA	98.1786	95.9834	122.18	NA	NA	NA
217	O54983	101.7	88.0715	95.4812	79.4	84.3954	95.6647	105.317	96.7858	104.001	132.121	98.1075	111.543
218	O54984	NA	NA	NA	97.7	93.0588	84.8123	NA	NA	NA	119.811	109.199	96.4371
219	O54988	86.2	70.0689	70.2509	82.5	84.8821	88.0042	125.698	115.341	130.107	140.585	98.41	108.342
220	O54991	96.6	95.8373	96.8881	93.4	87.413	92.0168	104.696	102.302	93.4321	128.384	107.787	92.2355
221	O55013	92.7	104.309	98.295	96.3	93.2535	85.4507	98.2821	98.7917	96.1801	105.851	115.551	103.44
222	O55017	108.2	95.3078	86.4771	90.3	90.4306	84.63	98.9028	95.8831	106.01	124.317	103.149	108.742
223	O55022	92.6	85.9535	101.109	100.1	91.8907	84.5388	112.248	101.7	97.6598	113.216	116.358	94.4363
224	O55023	122.3	79.5997	85.0702	98.8	97.7312	77.3343	94.3508	92.2724	119.961	148.06	103.25	79.0304
225	O55026	NA	NA	NA	97	89.7492	80.1613	NA	NA	NA	140.255	103.552	92.6356
226	O55029	93.9	95.3078	89.4785	90	101.82	85.4507	105.524	101.399	105.375	114.315	101.435	107.141
227	O55042	107.8	98.22	102.61	121.4	100.943	98.583	89.2815	87.2576	103.684	77.2723	98.2083	99.0381
228	O55057	91	88.248	95.9502	94.3	92.4747	77.5167	108.214	106.615	101.253	137.288	104.46	97.2374
229	O55091	125.9	74.2165	74.9406	92.3	79.6256	79.3406	96.4199	92.3727	131.798	136.078	112.425	103.64
230	O55098	87.2	81.5411	90.135	NA	NA	NA	111.524	112.633	110.132	NA	NA	NA
231	O55100	111.6	96.6315	83.2882	98	99.2887	85.1771	92.1782	98.9923	108.229	130.143	100.225	88.8342
232	O55102	101.9	90.0129	104.954	NA	NA	NA	111.214	93.5763	88.2532	NA	NA	NA
233	O55106	103.3	87.6302	101.859	NA	NA	NA	106.352	96.3846	95.0175	NA	NA	NA
234	O55125	106.4	96.0138	97.8261	100.5	96.7578	80.7085	97.4544	96.6855	94.9118	124.977	111.417	87.4336
235	O55126	NA	NA	NA	112	110.094	56.5416	NA	NA	NA	121.569	102.443	100.739
236	O55131	109.1	87.895	96.3254	122.8	87.0236	68.1235	99.3166	99.6944	98.6111	113.435	122.408	88.5341
237	O55142	102.6	89.6599	90.2288	105.8	100.262	88.5514	97.351	111.329	99.8794	104.642	98.7125	101.039
238	O55143	100.1	92.6604	100.827	92.7	92.8641	104.146	101.903	103.305	90.8955	101.125	112.325	94.3363
239	O55222	101.3	92.8369	92.1985	NA	NA	NA	103.144	99.3935	101.888	NA	NA	NA
240	O55234	NA	NA	NA	107.3	94.3242	62.6517	NA	NA	NA	95.4088	106.88	134.352
241	O55242	93.4	104.75	92.855	NA	NA	NA	99.1097	96.0837	102.944	NA	NA	NA
242	O70152	99.2	95.3961	90.4164	143.4	84.4927	70.1298	106.352	100.296	98.9281	132.121	93.7718	79.7307
243	O70161	109.4	85.1593	92.0109	111.2	98.3152	91.0137	101.8	98.3905	105.058	96.7278	107.182	93.7361
244	O70166	97.2	90.1894	92.3861	87.7	76.7054	93.02	104.696	99.6944	107.278	131.902	106.073	106.341
245	O70172	103.1	87.9832	91.6357	90.4	82.7405	67.7587	104.076	96.6855	108.44	147.18	109.703	107.641
246	O70194	NA	NA	NA	74.1	77.8735	85.0859	NA	NA	NA	111.897	130.676	121.147
247	O70228	96	95.5726	98.4826	104.3	91.696	86.2715	103.041	101.299	95.2289	117.832	101.536	99.0381
248	O70251	98.1	82.2471	91.4481	118.2	95.0056	67.7587	102.006	97.1869	122.392	119.261	104.863	97.5375
249	O70252	94.6	91.5132	101.296	92.8	90.4306	92.0168	106.558	103.907	92.0581	104.862	128.356	90.7349
250	O70274	93.9	83.4826	95.8564	NA	NA	NA	115.559	100.296	103.156	NA	NA	NA
251	O70293	87	89.0422	103.266	NA	NA	NA	108.731	100.597	102.099	NA	NA	NA
252	O70305	91.2	89.7482	90.0413	NA	NA	NA	110.283	103.104	107.384	NA	NA	NA
253	O70310	90	86.9243	87.9778	131.8	101.917	54.8088	107.696	106.314	113.831	113.106	113.434	87.9338
254	O70318	99.3	96.0138	104.861	87.4	82.3512	109.618	99.0063	100.798	88.676	114.974	91.7552	112.243
255	O70325	108.8	99.279	90.604	97.6	97.9259	93.2024	94.0404	96.0837	100.936	112.226	99.5191	98.838
256	O70340	95.4	112.34	78.9737	109.4	90.2359	71.0417	92.3851	104.509	105.375	137.727	116.156	79.5306
257	O70362	99.3	87.7185	96.2316	NA	NA	NA	106.352	96.9864	104.741	NA	NA	NA
258	O70378	99.9	92.3956	97.4509	94.7	95.2976	81.7117	103.972	96.8861	99.7737	130.363	111.518	88.6341
259	O70401	96.5	95.9256	95.8564	99.3	87.5103	77.6991	97.9717	102.904	100.725	112.776	124.021	100.038
260	O70404	94.3	81.2764	98.0137	99.3	81.1831	66.7555	101.075	108.22	109.286	161.47	105.972	92.2355
261	O70405	92	94.6018	82.444	NA	NA	NA	112.973	101.399	108.44	NA	NA	NA
262	O70422	NA	NA	NA	100.8	86.7316	32.101	NA	NA	NA	91.3418	106.577	186.172
263	O70435	101.8	96.455	92.3861	105.5	83.8113	60.6454	101.8	96.2843	101.359	92.441	100.83	157.861
264	O70439	92.2	92.7486	100.64	102.1	89.0678	86.0891	106.662	102.603	95.2289	114.864	110.106	98.3378
265	O70443	105.7	92.1309	94.2619	99.7	85.1741	90.7401	101.489	102.202	94.4891	119.921	111.921	93.2359
266	O70475	NA	NA	NA	122.6	131.022	45.3244	NA	NA	NA	78.8112	92.9652	129.35
267	O70480	91.9	89.6599	96.8881	91.5	92.4747	77.7902	109.145	104.709	98.5054	138.826	114.845	88.1339
268	O70481	NA	NA	NA	94.6	88.289	73.8688	NA	NA	NA	146.521	106.678	94.6364
269	O70492	117.3	81.2764	98.0137	NA	NA	NA	101.903	84.2487	109.497	NA	NA	NA
270	O70493	NA	NA	NA	92	93.1561	80.0702	NA	NA	NA	123.328	120.189	93.0358
271	O70496	106.8	95.3961	87.884	NA	NA	NA	101.8	104.709	93.6435	NA	NA	NA
272	O70503	98.7	90.7189	99.8895	106.6	86.9262	82.9884	103.351	100.597	96.92	117.502	123.416	83.7322
273	O70551	NA	NA	NA	132	74.4665	74.3248	NA	NA	NA	119.921	105.569	96.137
274	O70572	94.8	97.7788	95.4812	NA	NA	NA	98.5924	97.1869	106.01	NA	NA	NA
275	O70585	102.2	88.5127	94.9185	NA	NA	NA	104.179	107.116	93.8549	NA	NA	NA
276	O70589	104.6	86.6595	91.8233	102	91.5013	71.2241	103.248	99.0926	106.432	134.869	124.122	80.1308
277	O70591	105.4	80.1292	98.1074	NA	NA	NA	100.248	103.305	105.058	NA	NA	NA
278	O88307	95.5	90.8954	98.6702	98.1	90.6252	72.0449	102.524	106.916	95.7574	152.896	105.67	85.9331
279	O88342	91.4	95.4843	100.546	90.3	89.4571	82.7148	103.662	104.408	93.9606	141.025	82.983	116.645
280	O88343	98	94.0723	105.236	121.5	88.289	75.6927	102.11	105.11	84.1312	122.339	117.87	76.6295
281	O88351	NA	NA	NA	100.6	102.696	72.2273	NA	NA	NA	138.387	104.661	85.1327
282	O88384	94.9	89.1305	95.575	102.3	84.9794	76.4223	107.903	100.396	103.262	142.124	110.812	87.4336
283	O88444	87.6	88.7775	96.7943	NA	NA	NA	119.801	105.311	92.798	NA	NA	NA
284	O88447	111.4	82.6884	84.6013	90.1	87.413	83.5356	102.006	96.8861	115.733	119.921	119.988	100.539
285	O88448	102.9	87.3655	87.9778	102.8	96.1737	82.7148	105.214	97.3875	111.611	118.162	109.703	91.4352
286	O88451	NA	NA	NA	74.7	113.111	60.3718	NA	NA	NA	66.3905	107.485	175.968
287	O88455	99.8	91.9544	99.5143	NA	NA	NA	105.11	108.22	84.9767	NA	NA	NA
288	O88456	100.1	77.923	85.7268	NA	NA	NA	114.835	92.0718	124.083	NA	NA	NA
289	O88485	101.8	87.9832	91.3544	89.1	90.1385	88.0042	100.972	97.9893	111.823	126.735	108.695	98.738
290	O88487	97.2	90.7189	90.3226	102.1	98.5099	79.7054	101.593	101.901	109.814	115.963	104.359	100.339
291	O88507	101.9	97.9553	91.9171	76.3	76.024	102.96	98.7993	100.196	98.9281	125.966	93.066	125.748
292	O88520	106	83.6591	89.0095	NA	NA	NA	102.42	101.299	110.343	NA	NA	NA
293	O88531	95.6	89.9247	95.8564	84.7	90.5279	89.4633	105.11	97.7887	106.961	141.025	93.9735	102.74
294	O88543	119.9	77.8347	85.0702	100.2	100.943	72.5921	88.6608	90.8683	132.116	128.384	109.199	91.4352
295	O88544	111.9	84.6298	84.1323	NA	NA	NA	102.213	95.0807	114.993	NA	NA	NA
296	O88545	NA	NA	NA	73.6	92.7668	88.825	NA	NA	NA	140.585	103.048	103.54
297	O88569	NA	NA	NA	121.8	99.97	74.2336	NA	NA	NA	124.317	96.6959	85.0327
298	O88587	101.1	89.4835	96.1378	128.6	91.1119	70.4946	106.455	101.199	96.4972	115.854	109.804	86.2332
299	O88597	103.4	87.2773	89.1971	99.8	90.9173	78.4286	102.524	102.202	107.384	123.878	116.358	92.6356
300	O88630	NA	NA	NA	102.3	109.704	99.8597	NA	NA	NA	143.883	88.6295	144.756
301	O88643	150.8	66.0977	65.2799	99.1	94.8109	84.9947	80.7982	79.2339	156.108	127.615	102.645	92.5356
302	O88685	101.9	93.7194	94.8247	90.2	97.6338	84.63	101.903	93.1751	105.164	103.763	113.131	110.242
303	O88696	103.1	102.632	87.415	94.5	94.6162	77.3343	94.2473	87.5585	115.205	130.583	113.232	92.3355
304	O88703	97.8	91.8661	102.797	93.2	92.1827	90.5577	105.834	96.7858	94.9118	121.349	104.157	99.1381
305	O88704	100.6	87.542	97.3571	101.5	84.59	70.3122	102.627	94.1781	109.075	160.48	104.157	85.2328
306	O88705	103.7	97.514	98.0137	NA	NA	NA	99.1097	90.768	100.514	NA	NA	NA
307	O88712	160.8	67.6862	64.0606	97.4	91.3066	91.4697	76.8669	77.0274	151.14	119.921	102.544	97.8376
308	O88735	84.2	87.542	87.0399	NA	NA	NA	107.903	111.329	114.676	NA	NA	NA
309	O88736	97.9	85.5123	95.1999	NA	NA	NA	107.593	98.1899	107.595	NA	NA	NA
310	O88737	99.6	83.4826	99.3268	100.7	92.6694	83.5356	109.766	97.7887	101.782	130.583	97.7042	96.8372
311	O88738	93.5	77.8347	98.4826	93.9	89.8465	74.5984	113.076	94.9804	115.522	128.274	122.408	93.9361
312	O88741	103.4	87.189	95.1061	97.9	94.3242	88.5514	103.351	100.196	102.099	121.349	107.888	90.8349
313	O88745	98.5	86.13	86.0082	NA	NA	NA	109.766	95.8831	116.79	NA	NA	NA
314	O88746	100.2	71.0396	92.1047	NA	NA	NA	115.559	101.801	114.148	NA	NA	NA
315	O88809	98	87.189	91.8233	NA	NA	NA	110.49	99.8949	104.424	NA	NA	NA
316	O88839	93.7	90.4542	99.0454	100.6	90.5279	77.0607	108.317	103.806	95.1232	136.298	106.981	91.7353
317	O88844	99.1	89.7482	91.073	96.3	109.607	81.5293	106.972	96.2843	108.652	102.773	100.527	108.642
318	O88845	NA	NA	NA	87.3	80.1123	105.423	NA	NA	NA	107.5	115.047	102.84
319	O88848	109.4	88.248	86.7585	95.8	86.6342	74.5984	101.386	98.6914	107.489	132.231	119.08	94.9365
320	O88851	NA	NA	NA	103.8	100.846	84.7212	NA	NA	NA	121.569	100.023	89.9346
321	O88898	91.2	86.5713	100.077	NA	NA	NA	107.49	92.3727	114.148	NA	NA	NA
322	O88910	83.7	111.898	93.2302	114.5	91.5013	76.6959	87.9366	97.7887	113.725	108.269	113.03	96.9373
323	O88935	120.5	75.452	93.1364	107.9	101.333	87.8218	103.662	87.2576	113.619	109.698	101.637	91.1351
324	O88951	110.2	83.3943	95.1061	102.1	87.8997	82.5324	101.696	94.9804	106.538	133.44	108.896	87.8338
325	O88952	102	91.6014	98.5764	NA	NA	NA	103.765	96.4849	97.7655	NA	NA	NA
326	O88983	97.8	95.9256	92.855	99.5	85.5635	79.3406	103.248	97.3875	103.05	131.132	116.559	90.7349
327	O88998	94.7	84.5416	97.3571	113	97.9259	71.1329	109.972	99.5941	105.798	122.778	115.249	82.4317
328	O89001	102.2	95.9256	90.5102	92.3	87.1209	78.2462	95.5922	103.305	102.839	132.671	112.627	100.139
329	O89017	110.3	91.7779	90.135	NA	NA	NA	99.7304	97.9893	100.936	NA	NA	NA
330	O89023	NA	NA	NA	83.1	71.4489	134.879	NA	NA	NA	92.3311	80.3614	132.051
331	O89050	NA	NA	NA	107.2	89.7492	93.3848	NA	NA	NA	94.4195	127.751	85.5329
332	O89051	90.9	101.485	94.2619	93.6	85.8555	68.1235	117.318	93.9775	91.3183	170.593	105.771	83.4321
333	O89053	149.2	69.8924	71.1889	96.4	91.5987	73.6864	80.9017	85.9538	139.303	155.754	100.628	87.2336
334	O89079	NA	NA	NA	111.9	107.076	73.504	NA	NA	NA	97.1675	123.113	87.0335
335	O89084	100.3	89.1305	85.9144	97.4	89.4571	84.9947	107.593	92.473	117.107	130.473	112.022	87.7337
336	O89112	98.4	86.2183	92.1985	98.5	87.0236	77.5167	105.731	100.697	108.863	136.628	110.51	93.2359
337	O89114	97.7	73.7753	94.8247	94.4	78.2628	68.3059	125.801	98.6914	103.05	140.036	125.332	98.6379
338	O89116	95.4	92.9251	99.7957	84.8	93.8375	95.3911	102.731	99.3935	99.7737	136.298	92.1585	98.838
339	P00329	NA	NA	NA	75.3	166.747	55.5384	NA	NA	NA	58.8061	76.1266	163.663
340	P00397	NA	NA	NA	74.2	81.4751	154.486	NA	NA	NA	102.334	103.351	77.1297
341	P00405	NA	NA	NA	103.3	95.8817	94.7527	NA	NA	NA	117.282	107.989	80.631
342	P00493	111.6	73.5988	92.2923	93.8	97.1471	84.63	101.489	100.798	114.148	123.768	108.896	93.1358
343	P00520	92.9	90.4542	96.3254	NA	NA	NA	103.041	101.7	106.644	NA	NA	NA
344	P00920	99.5	104.574	94.0744	105.6	99.1913	95.9383	101.903	104.609	83.3913	109.039	104.762	84.2324
345	P01027	92.4	94.1606	99.233	NA	NA	NA	116.283	92.9745	95.1232	NA	NA	NA
346	P01029	82.6	101.132	100.64	NA	NA	NA	93.937	103.004	107.912	NA	NA	NA
347	P01631	90.6	111.281	86.9461	NA	NA	NA	97.7648	90.6677	111.717	NA	NA	NA
348	P01725	99	92.1309	76.9102	39.6	98.7046	74.2336	98.2821	104.107	122.498	123.658	142.271	124.048
349	P01726	87.4	102.721	99.4206	101	95.979	76.5135	97.6613	102.202	99.2452	115.634	103.855	108.542
350	P01831	88	89.8364	102.985	101.7	85.3688	88.4602	109.248	109.724	90.2614	104.972	110.409	108.642
351	P01837	80.3	88.8657	87.9778	116.3	114.474	96.8502	105.214	111.93	118.376	112.556	48.3984	109.542
352	P01843	85.8	99.3672	100.546	83.7	102.598	89.0986	99.5235	102.503	101.57	97.6072	110.005	115.244
353	P01864	90.5	94.6901	94.6371	78.8	87.997	88.9162	104.282	98.892	107.701	142.124	110.005	94.9365
354	P01867	72.5	86.483	99.3268	NA	NA	NA	138.629	97.6884	97.3428	NA	NA	NA
355	P01868	83.6	100.073	101.672	101	108.244	82.2589	100.558	103.305	99.7737	104.642	112.123	91.2351
356	P01872	88.2	86.483	91.1668	NA	NA	NA	105.214	112.332	108.758	NA	NA	NA
357	P01942	91.4	74.3048	85.7268	77.1	98.0232	72.5009	119.076	89.063	136.449	134.759	121.097	100.038
358	P02088	101.3	86.2183	91.7295	103.9	80.6964	58.3655	103.041	97.5881	112.245	119.481	146.607	95.0366
359	P02301	113	83.0413	83.0068	99.7	108.925	78.2462	105.524	105.612	102.522	133.99	92.1585	89.3344
360	P02535	NA	NA	NA	73.7	91.5013	72.5921	NA	NA	NA	127.395	142.271	95.7368
361	P02802	87.1	94.6901	116.772	NA	NA	NA	103.869	103.405	82.0173	NA	NA	NA
362	P03356	75.4	91.5132	111.989	NA	NA	NA	124.456	87.7591	99.0338	NA	NA	NA
363	P03888	NA	NA	NA	128.4	106.589	81.5293	NA	NA	NA	90.7923	112.325	78.8303
364	P03893	NA	NA	NA	74.5	103.182	101.684	NA	NA	NA	114.974	116.963	87.4336
365	P03899	NA	NA	NA	83.9	98.9966	101.592	NA	NA	NA	112.006	126.441	75.6291
366	P03921	NA	NA	NA	77	72.325	110.621	NA	NA	NA	121.349	97.7042	120.046
367	P03930	NA	NA	NA	103.7	84.006	83.6268	NA	NA	NA	106.73	110.409	111.743
368	P03995	105.9	82.1589	87.6026	NA	NA	NA	106.972	93.476	117.319	NA	NA	NA
369	P04104	NA	NA	NA	78.7	133.553	58.4567	NA	NA	NA	90.1327	147.514	91.7353
370	P04370	82.7	80.4822	81.7875	114.8	102.598	77.1519	118.973	112.432	118.164	112.446	110.61	83.232
371	P04627	108.6	87.9832	91.7295	89.3	93.1561	83.5356	99.627	99.8949	103.579	124.317	117.769	93.4359
372	P04918	87.9	92.3074	97.4509	NA	NA	NA	109.352	94.5793	109.392	NA	NA	NA
373	P04925	93.6	93.8076	92.7612	121.4	95.0056	87.7306	101.8	107.217	101.253	106.181	86.4112	102.539
374	P05063	104.8	88.601	103.36	115.4	88.4837	79.067	101.593	101.5	89.9443	116.183	116.055	86.2332
375	P05064	99.9	87.2773	96.4192	123.1	90.9173	78.4286	100.351	109.122	97.8712	105.631	117.87	84.4325
376	P05132	102.8	89.8364	93.4178	119.5	91.696	77.3343	98.7993	105.211	100.725	106.73	120.492	84.9327
377	P05201	98.6	89.9247	103.266	92.7	92.4747	81.8941	107.696	97.0867	93.6435	132.121	104.46	98.838
378	P05202	107.6	92.4839	86.8523	98	100.262	93.1112	97.0406	102.101	105.164	122.998	104.561	81.3313
379	P05214	NA	NA	NA	98.7	94.9083	70.4946	NA	NA	NA	137.727	107.989	94.2362
380	P05366	90.7	94.1606	94.8247	NA	NA	NA	112.352	96.7858	101.888	NA	NA	NA
381	P05480	99.6	91.8661	97.0757	102	97.1471	83.262	105.214	99.1929	97.4484	122.559	106.174	90.0346
382	P05532	98.5	90.9837	104.298	NA	NA	NA	102.317	95.2813	98.6111	NA	NA	NA
383	P05555	102.6	97.514	101.109	109.8	93.7402	73.3216	99.5235	93.476	94.8061	115.304	115.652	93.9361
384	P06151	103.1	77.3052	80.662	120.2	115.934	65.4788	110.49	104.208	119.01	82.6583	114.744	99.8384
385	P06327	101.7	107.221	100.077	NA	NA	NA	86.0744	93.3757	99.2452	NA	NA	NA
386	P06330	94	101.044	88.5406	NA	NA	NA	104.282	108.32	93.3264	NA	NA	NA
387	P06745	100.1	92.5721	100.827	87.6	83.0326	99.9509	102.006	105.712	88.2532	100.795	106.981	119.846
388	P06797	97	92.1309	88.6344	NA	NA	NA	102.11	96.5852	115.416	NA	NA	NA
389	P06837	99.5	86.836	100.077	104.9	91.2093	120.652	103.765	111.429	88.676	97.7171	71.2867	109.642
390	P07214	103.1	83.3943	97.5447	NA	NA	NA	97.1441	104.509	106.115	NA	NA	NA
391	P07356	90.5	77.0405	97.0757	92.9	81.0857	69.5826	105.938	107.116	115.733	145.092	108.09	108.242
392	P07724	101	96.5433	105.892	81.8	87.413	79.1582	103.351	83.3461	99.0338	131.022	128.054	95.4367
393	P07901	111.7	80.4822	90.0413	105.1	111.359	72.6833	98.489	98.0896	114.254	90.5724	110.51	108.742
394	P08003	98	93.3664	100.452	99.9	91.8907	83.5356	102.42	102.804	92.5866	124.097	107.485	94.6364
395	P08113	96	95.5726	99.8895	103.6	93.0588	84.9947	103.972	105.411	88.3589	121.569	105.166	92.8357
396	P08226	94.5	95.3961	92.2923	97.7	94.2269	84.9035	102.731	104.709	100.619	90.3526	122.307	108.942
397	P08228	101.4	91.7779	103.454	108.8	94.2269	73.2304	98.6959	104.208	89.8386	137.727	105.468	84.1324
398	P08249	115.8	86.7478	94.8247	111.1	90.0412	95.4823	100.041	82.1425	112.14	112.666	103.048	87.1335
399	P08414	122.3	79.8644	75.3158	90.8	88.1917	78.4286	102.42	91.3698	123.554	133.66	101.435	110.543
400	P08551	89.6	63.5385	69.4068	NA	NA	NA	111.421	108.22	157.376	NA	NA	NA
401	P08553	88.8	64.5975	71.0951	94.7	82.0592	74.416	111.835	110.426	152.197	145.641	113.03	94.8365
402	P08556	95.7	88.7775	100.546	NA	NA	NA	107.179	103.205	95.2289	NA	NA	NA
403	P08730	58.9	33.6225	43.2386	NA	NA	NA	67.9698	127.978	278.711	NA	NA	NA
404	P08752	98	90.3659	102.422	92.8	84.1033	84.2652	104.903	106.414	87.619	138.387	113.534	89.9346
405	P08905	85	93.7194	92.6675	NA	NA	NA	111.938	94.7798	113.408	NA	NA	NA
406	P09055	99.9	93.2781	107.581	NA	NA	NA	103.248	94.9804	89.9443	NA	NA	NA
407	P09103	94.9	92.4839	102.141	99.7	97.0498	90.1017	106.352	103.104	90.7898	107.939	107.989	96.3371
408	P09240	NA	NA	NA	123.9	108.341	61.9221	NA	NA	NA	112.666	125.332	70.127
409	P09405	93.9	84.1886	90.2288	109.6	88.1917	80.0702	99.1097	102.904	122.709	84.7468	127.55	108.542
410	P09411	87.5	79.5997	92.7612	111.4	90.9173	79.4318	118.766	112.532	101.888	120.03	111.014	88.7341
411	P09541	86	85.424	104.954	75.2	80.1123	95.6647	105.42	102.703	106.749	131.682	116.66	102.239
412	P09671	NA	NA	NA	86.2	115.837	99.3125	NA	NA	NA	111.677	95.6876	89.3344
413	P09813	102.9	99.632	93.6992	NA	NA	NA	102.834	86.5556	104.213	NA	NA	NA
414	P0C0A3	91.9	92.3074	95.3875	94.7	93.5455	87.2746	108.007	102.101	101.042	121.24	100.023	104.04
415	P0C192	106.8	84.3651	87.7902	NA	NA	NA	99.3166	86.5556	128.522	NA	NA	NA
416	P0C6F1	101.5	80.4822	97.0757	NA	NA	NA	113.283	109.925	89.5215	NA	NA	NA
417	P0C7L0	82.8	82.3354	84.1323	100.2	88.3864	74.7808	113.386	120.054	110.871	139.156	107.586	93.636
418	P0C7M9	94.8	97.6023	96.2316	110.3	94.4216	80.7997	100.868	103.104	96.92	121.459	112.022	82.6318
419	P0DN34	NA	NA	NA	97.7	97.5365	88.7338	NA	NA	NA	117.722	109.602	89.0342
420	P0DP27	96.4	87.542	98.9516	105.4	98.5099	95.7559	100.868	108.721	98.294	108.929	104.762	85.5329
421	P0DP60	86.8	93.7194	106.83	NA	NA	NA	106.145	102.302	93.5378	NA	NA	NA
422	P10126	97.7	85.5123	88.0716	130	93.0588	75.7839	108.421	107.317	105.375	94.5295	98.6116	107.641
423	P10605	99.2	98.6612	98.3888	95.6	99.4833	88.369	97.0406	104.709	90.8955	113.765	122.206	80.531
424	P10630	137	72.0986	71.4702	78.6	76.7054	66.026	82.35	85.6529	148.181	91.0121	142.473	146.156
425	P10637	83.8	82.9531	87.9778	96.7	85.9528	96.0295	108.628	115.742	114.148	121.899	95.1834	104.44
426	P10639	118.9	79.6879	79.2551	104.3	88.6784	72.5921	94.4542	105.01	116.579	126.076	122.004	89.2343
427	P10649	103.2	90.1012	104.954	116.6	97.9259	67.8499	101.903	99.0926	90.3671	103.433	107.989	107.241
428	P10852	99.8	91.7779	100.452	99.1	90.7226	79.2494	104.489	104.308	88.8874	118.162	117.467	96.8372
429	P10854	90.6	60.0086	59.8399	NA	NA	NA	195.116	114.538	79.058	NA	NA	NA
430	P11031	NA	NA	NA	87.7	96.0764	80.5261	NA	NA	NA	116.403	116.862	103.54
431	P11214	93.9	96.3668	97.0757	NA	NA	NA	101.282	100.998	100.302	NA	NA	NA
432	P11352	103.8	76.9522	84.4137	106.8	107.368	73.1392	120.525	106.414	101.782	129.264	90.3436	95.4367
433	P11404	NA	NA	NA	78.8	89.3598	84.9035	NA	NA	NA	164.327	97.5025	90.1347
434	P11438	85	102.103	107.487	94.4	98.1206	85.0859	108.524	104.509	79.9035	104.862	127.348	89.9346
435	P11499	119.9	81.7176	86.1957	98.8	113.306	69.4914	93.937	94.6795	116.684	103.543	107.485	107.841
436	P11609	104.7	100.603	96.513	NA	NA	NA	99.8339	99.5941	87.302	NA	NA	NA
437	P11627	98	92.8369	99.7957	93.2	86.9262	87.2746	102.524	103.104	93.5378	129.703	114.442	90.3347
438	P11714	NA	NA	NA	95.1	97.5365	74.2336	NA	NA	NA	102.553	115.45	115.544
439	P11798	114.5	84.7181	96.4192	94.3	94.4216	109.982	91.8679	88.6618	115.628	109.478	81.8739	107.241
440	P11835	99.9	100.426	107.581	NA	NA	NA	101.903	92.3727	85.6109	NA	NA	NA
441	P11862	107.5	88.8657	102.047	NA	NA	NA	111.835	82.644	97.7655	NA	NA	NA
442	P11881	94.1	88.248	102.047	102.2	89.5545	84.174	106.972	106.815	92.1638	123.108	110.51	92.0354
443	P11983	103.4	84.2768	90.0413	89.4	90.9173	83.3532	103.972	97.1869	113.725	110.468	110.106	116.145
444	P12023	99.9	99.0142	99.8895	76.4	102.89	101.501	97.8683	99.2932	92.798	99.2559	104.863	112.443
445	P12025	100.2	85.3358	78.1295	NA	NA	NA	106.248	107.317	116.367	NA	NA	NA
446	P12367	100.2	89.5717	101.203	102.4	87.8023	109.253	103.351	103.606	92.2695	83.9773	107.081	104.94
447	P12382	99.2	84.0121	86.0082	88.8	84.9794	109.891	104.903	103.004	116.05	108.929	81.7731	123.247
448	P12658	107.3	85.5123	94.9185	111.3	80.6964	93.6584	100.972	97.3875	105.587	121.899	113.938	79.1304
449	P12787	NA	NA	NA	105.5	95.7844	80.6173	NA	NA	NA	112.776	115.551	90.5348
450	P12815	NA	NA	NA	105.5	89.8465	72.1361	NA	NA	NA	125.087	108.997	101.239
451	P12849	NA	NA	NA	93.9	91.7933	81.3469	NA	NA	NA	127.505	120.492	87.0335
452	P12894	89.8	96.5433	89.7599	NA	NA	NA	112.766	106.514	95.0175	NA	NA	NA
453	P12960	93.6	86.3065	102.328	98.5	90.2359	89.7369	109.352	104.809	94.4891	124.977	104.46	93.0358
454	P12961	89.3	88.248	95.0123	98	105.713	95.3911	99.627	98.892	121.018	94.6394	113.938	89.7345
455	P12970	96	87.4537	93.5116	102.1	85.4661	80.8909	102.731	107.417	104.318	138.057	103.754	92.9357
456	P13020	88.4	81.0999	96.1378	102.6	95.0056	81.2557	108.317	107.116	111.823	126.076	104.863	92.0354
457	P13595	95.5	90.6307	106.267	100.1	95.687	94.9351	104.489	107.016	85.3995	123.438	88.0245	98.0377
458	P13707	104.8	83.6591	86.7585	97.8	112.332	84.5388	104.076	99.3935	114.359	90.6823	106.577	106.041
459	P14094	93.9	90.0129	106.736	86.6	95.5897	94.0231	107.076	108.42	83.2857	132.671	95.0826	97.2374
460	P14106	97.7	97.514	101.296	85.1	88.8731	79.8878	96.213	99.4938	96.92	139.156	108.19	102.139
461	P14115	93.9	97.6023	99.0454	87.5	93.5455	99.5861	101.903	99.7946	97.0257	94.8592	106.981	114.944
462	P14131	82.2	93.8958	86.7585	100.6	92.0854	83.5356	102.731	112.733	113.302	103.872	118.778	101.039
463	P14148	90.3	89.2187	95.3875	96.7	88.9704	89.0986	107.903	105.11	103.262	118.162	104.056	103.54
464	P14152	105.1	86.7478	99.4206	108.9	95.7844	84.9035	101.282	101.399	96.92	108.269	112.022	90.1347
465	P14206	90.5	77.7465	87.3213	90.8	73.9798	66.7555	122.18	111.63	104.53	139.706	120.794	113.043
466	P14211	91.9	93.9841	105.236	103.5	90.4306	94.9351	103.351	109.523	84.871	102.114	104.561	102.94
467	P14231	97.8	91.7779	99.8895	88.4	94.2269	88.2778	101.8	107.016	91.6354	126.186	110.005	94.1362
468	P14576	95.7	78.6289	90.3226	NA	NA	NA	120.835	91.5704	117.002	NA	NA	NA
469	P14685	102.3	87.895	100.077	91.2	90.4306	77.8814	101.903	97.0867	101.57	113.985	107.686	120.046
470	P14824	95.5	94.0723	108.894	97	88.0943	87.8218	101.696	103.506	84.9767	122.119	114.543	91.5352
471	P14869	97.2	88.8657	91.8233	101.6	96.2711	76.2399	103.144	106.615	103.79	107.939	115.45	103.24
472	P14873	96.4	84.2768	91.1668	96.8	94.0322	82.8972	105.524	105.11	110.026	127.065	108.392	92.6356
473	P15105	101.4	102.456	106.08	96.1	95.395	102.96	93.6266	93.476	90.4727	108.049	93.8726	101.539
474	P15116	92.6	93.3664	87.3213	95.3	87.413	79.1582	106.455	107.517	103.896	134.21	110.308	96.6372
475	P15209	93.9	92.8369	105.705	81.9	90.0412	80.6173	105.524	99.2932	92.0581	135.859	119.483	94.9365
476	P15331	94.8	79.2467	74.753	NA	NA	NA	132.319	104.408	109.497	NA	NA	NA
477	P15388	99.1	108.81	94.6371	104.1	99.4833	75.6015	98.6959	85.7532	101.253	141.025	99.7208	83.6322
478	P15508	105.9	83.0413	82.5378	NA	NA	NA	105.524	97.6884	119.01	NA	NA	NA
479	P15532	108.2	87.3655	93.9806	89	87.0236	83.718	104.282	94.3787	103.262	137.507	108.896	96.8372
480	P15920	NA	NA	NA	62.7	69.6967	128.404	NA	NA	NA	98.7063	90.9486	145.056
481	P16014	96.7	94.7783	92.1047	96.2	96.9525	93.2024	102.938	107.116	96.4972	114.315	106.174	92.6356
482	P16015	NA	NA	NA	128.8	136.668	48.5163	NA	NA	NA	89.9129	77.3365	119.246
483	P16054	122.6	78.9819	82.1626	97.7	94.3242	96.3031	93.5232	92.6736	124.294	112.006	98.2083	100.439
484	P16125	136.8	75.805	79.9116	106.9	98.7046	81.2557	91.7644	87.4582	122.815	116.183	112.627	85.2328
485	P16283	110.4	83.3943	94.4495	92.4	83.8113	75.9663	102.834	102.904	97.5541	136.628	112.627	102.239
486	P16330	88.1	85.5123	99.3268	99.1	93.7402	100.407	115.766	117.748	84.4483	115.744	95.4859	94.4363
487	P16331	NA	NA	NA	116.5	162.561	47.7867	NA	NA	NA	81.5591	82.1764	108.442
488	P16390	96.5	84.2768	94.0744	NA	NA	NA	101.593	98.3905	117.636	NA	NA	NA
489	P16460	97.5	85.1593	94.6371	142.2	152.632	45.8716	108.524	104.509	101.359	70.5673	85.4029	101.839
490	P16546	111.3	82.5119	91.073	94.5	87.8997	87.0922	93.2128	97.5881	117.107	118.052	113.938	99.4382
491	P16858	89.4	82.5119	92.3861	106.2	105.713	101.045	119.387	97.3875	112.14	89.2534	98.6116	95.5367
492	P17047	102.1	98.1318	93.2302	71.1	97.7312	97.5798	99.7304	96.5852	99.8794	117.612	100.527	114.844
493	P17095	98.5	94.3371	88.7282	NA	NA	NA	97.4544	102.603	109.497	NA	NA	NA
494	P17156	102.5	85.6888	91.5419	NA	NA	NA	105.627	96.4849	110.449	NA	NA	NA
495	P17182	88.7	80.4822	91.4481	116.2	90.6252	85.3595	117.628	109.624	105.27	106.95	112.123	88.6341
496	P17183	95.9	89.307	102.797	98.9	86.3422	90.9225	106.455	105.11	90.4727	107.17	110.51	105.741
497	P17426	103.8	97.867	98.9516	106.9	98.3152	90.5577	95.2819	97.7887	95.3346	105.411	95.8892	101.839
498	P17427	103.7	97.0728	101.953	103.1	99.5807	86.5451	94.1439	96.6855	95.2289	108.819	109.905	91.7353
499	P17439	103	89.4835	93.9806	NA	NA	NA	104.076	98.1899	102.416	NA	NA	NA
500	P17563	NA	NA	NA	106.6	104.934	77.5167	NA	NA	NA	128.384	97.5025	87.1335
501	P17665	NA	NA	NA	99.5	115.934	103.052	NA	NA	NA	63.9723	123.517	87.7337
502	P17710	108.7	84.7181	88.4468	107	97.3418	96.759	107.179	94.8801	108.652	110.687	101.939	85.1327
503	P17742	95.8	88.954	106.08	119	87.6076	89.8281	109.766	104.509	84.4483	102.663	115.45	84.6326
504	P17751	97.8	92.6604	102.703	121.7	89.1651	83.262	102.627	104.007	89.6272	100.465	120.088	84.9327
505	P17809	NA	NA	NA	147.9	77.2894	67.3939	NA	NA	NA	147.62	82.983	82.2316
506	P17879	112.2	91.5132	85.164	NA	NA	NA	104.903	92.7739	105.164	NA	NA	NA
507	P18052	NA	NA	NA	109	76.608	75.4192	NA	NA	NA	130.143	103.25	109.042
508	P18242	100.2	93.0134	95.8564	95.5	101.917	92.1992	103.972	95.5822	101.888	106.95	102.242	100.139
509	P18524	89.6	104.133	92.1985	104.8	124.695	64.7492	92.5921	107.016	103.473	97.4973	125.735	82.7318
510	P18527	96.4	108.369	89.7599	NA	NA	NA	84.8329	104.107	104.741	NA	NA	NA
511	P18529	97.7	102.368	95.4812	67.1	88.7757	132.143	92.2817	101.399	99.4566	103.872	108.291	94.8365
512	P18572	98.1	90.1894	98.8578	99	90.8199	88.5514	105.834	106.314	90.8955	126.076	105.972	90.8349
513	P18653	109.5	87.0125	90.2288	NA	NA	NA	104.282	92.9745	108.018	NA	NA	NA
514	P18654	NA	NA	NA	100	97.8285	81.6205	NA	NA	NA	125.746	103.552	92.9357
515	P18760	98.8	81.4529	94.5433	89.2	102.404	100.498	103.041	103.606	111.188	91.7815	105.166	107.541
516	P18826	97.5	82.8649	90.0413	86.9	91.696	86.9099	111.628	100.296	110.66	108.269	119.685	106.341
517	P18872	96.6	89.4835	104.298	104.8	97.6338	93.5672	106.558	108.019	84.7654	109.698	103.754	89.6345
518	P19096	109.2	82.6884	87.7902	110.3	106.881	69.0354	105.11	94.7798	113.619	104.532	97.4017	112.643
519	P19157	93.2	87.542	110.019	116.1	136.473	73.2304	113.8	99.3935	85.7166	90.7923	83.3863	98.2378
520	P19246	91.5	65.6565	68.5627	92.2	89.4571	76.6959	110.697	105.311	157.482	130.473	114.039	100.038
521	P19253	90.3	88.0715	96.9819	107.8	89.2624	84.0828	106.972	103.907	105.164	112.886	106.981	99.6383
522	P19324	98.8	87.7185	95.9502	NA	NA	NA	109.352	98.9923	100.619	NA	NA	NA
523	P19536	NA	NA	NA	94.5	102.696	96.1207	NA	NA	NA	111.897	100.83	92.9357
524	P19783	91.8	96.1903	98.0137	93.1	102.793	87.0922	107.386	95.181	101.359	128.714	105.67	83.8322
525	P20029	93.4	91.5132	103.266	101.2	94.8109	87.7306	106.352	107.317	87.7247	118.162	104.258	94.3363
526	P20033	82.9	91.4249	94.7309	NA	NA	NA	115.042	104.007	103.156	NA	NA	NA
527	P20060	98.9	90.0129	96.3254	96.2	89.1651	81.3469	105.007	102.202	98.294	126.845	111.215	97.4375
528	P20065	93.7	88.248	101.578	NA	NA	NA	107.593	112.131	86.9849	NA	NA	NA
529	P20108	132.8	83.8356	70.1571	104.6	91.3066	75.5103	93.6266	97.5881	115.945	122.449	114.845	93.636
530	P20152	99.6	81.8941	86.1019	NA	NA	NA	104.386	102.904	118.587	NA	NA	NA
531	P20352	105	94.8666	92.1985	NA	NA	NA	118.145	99.1929	80.3263	NA	NA	NA
532	P20357	88.7	86.7478	87.6026	95.4	88.3864	96.2119	103.662	110.125	115.839	110.907	98.7125	109.442
533	P20444	97.5	97.9553	103.829	94.9	93.4481	94.1143	101.8	95.181	92.3752	111.237	100.326	105.341
534	P20917	85.9	82.7766	95.8564	100	86.0502	77.8814	116.18	117.748	93.3264	143.883	109.804	86.5333
535	P21107	99	89.3952	93.793	90.7	95.103	91.4697	99.8339	103.205	106.01	112.116	108.997	101.139
536	P21126	96	87.542	89.4785	NA	NA	NA	106.558	93.6766	119.432	NA	NA	NA
537	P21237	NA	NA	NA	83.7	82.3512	86.9099	NA	NA	NA	150.368	96.5951	103.94
538	P21271	NA	NA	NA	101.3	82.0592	79.1582	NA	NA	NA	151.247	107.384	83.5321
539	P21278	94.7	86.483	104.11	111.5	94.2269	81.8941	113.283	103.205	88.676	130.143	101.233	83.232
540	P21279	94.9	89.5717	101.578	100.1	89.1651	91.3785	105.834	105.612	92.6923	122.339	109.098	88.6341
541	P21460	88.8	104.486	104.204	93.6	90.0412	86.3627	97.0406	105.512	87.4077	121.02	112.929	97.1374
542	P21661	103	92.2191	91.2606	90.7	93.5455	80.7997	99.7304	99.9952	104.847	143.663	99.1158	95.6368
543	P21836	100.1	98.3082	88.7282	65.6	67.2632	90.1017	100.765	99.5941	102.733	140.695	80.9664	158.361
544	P21956	94.6	82.0706	86.2895	98.2	104.934	73.8688	116.49	102.904	111.188	135.089	113.938	77.2297
545	P21995	90.5	89.3952	109.456	74.2	93.8375	104.784	108.628	103.706	88.0418	106.401	121.5	97.2374
546	P22005	NA	NA	NA	97	113.695	94.1143	NA	NA	NA	100.685	108.09	84.2324
547	P22437	96.2	91.6014	83.5695	NA	NA	NA	107.696	98.0896	115.099	NA	NA	NA
548	P22682	93.6	84.8063	83.6633	NA	NA	NA	112.455	103.004	115.839	NA	NA	NA
549	P22723	NA	NA	NA	105.2	86.2449	86.5451	NA	NA	NA	122.009	107.485	93.8361
550	P22892	114.9	80.3057	84.3199	101.9	93.8375	73.4128	102.42	93.8772	117.847	131.682	110.409	91.9354
551	P23116	NA	NA	NA	91.4	74.7585	73.8688	NA	NA	NA	117.722	105.569	139.053
552	P23242	88.2	90.5424	102.891	NA	NA	NA	110.904	95.181	102.944	NA	NA	NA
553	P23506	145.4	76.158	72.4082	112.8	88.4837	73.5952	82.6604	80.5378	138.457	126.406	117.467	84.2324
554	P23818	96.2	93.5429	94.4495	87.7	87.705	76.8783	105.214	105.311	95.546	142.674	111.72	97.4375
555	P23819	100.7	90.6307	98.4826	93.6	87.997	82.7148	106.662	102.804	90.7898	127.725	113.837	96.237
556	P23927	109.2	84.9828	93.6054	96.4	97.3418	90.4665	105.524	91.2695	107.489	112.006	104.46	98.9381
557	P24270	98.4	85.6005	105.517	113.8	100.165	69.0354	108.421	96.5852	96.1801	121.459	96.2926	101.639
558	P24369	84.6	90.9837	92.855	118.7	91.2093	82.5324	107.179	112.332	103.367	104.642	107.485	95.3367
559	P24457	96.1	89.6599	93.9806	NA	NA	NA	107.903	100.296	103.367	NA	NA	NA
560	P24547	109.4	79.1584	83.382	95.1	81.9618	78.9758	111.731	89.1633	121.758	133.44	106.174	107.341
561	P24549	132	77.1287	78.5985	132.4	189.622	51.7994	87.7297	91.771	127.359	70.6773	57.6747	94.6364
562	P24638	NA	NA	NA	40.3	101.82	72.5009	NA	NA	NA	139.046	127.348	122.847
563	P24668	98.8	94.1606	90.7916	94.8	93.4481	74.5072	99.627	103.806	103.367	117.502	122.408	99.2382
564	P25444	91.4	91.6896	97.8261	98.3	89.1651	77.0607	106.041	104.809	98.7168	111.347	118.778	106.641
565	P25785	NA	NA	NA	73.4	90.0412	63.5637	NA	NA	NA	189.169	107.686	85.5329
566	P25911	101.3	90.4542	100.827	101.6	89.7492	82.2589	112.455	97.0867	87.9361	135.969	108.09	85.1327
567	P25976	77.3	83.4826	84.5075	NA	NA	NA	107.179	119.453	121.863	NA	NA	NA
568	P26039	110.2	87.2773	87.884	NA	NA	NA	94.8681	96.0837	115.945	NA	NA	NA
569	P26040	95.6	95.4843	101.484	94.2	101.041	103.964	103.144	100.196	93.3264	86.8352	84.5963	125.048
570	P26041	101.1	98.4847	100.452	97.7	94.4216	82.5324	99.1097	100.196	89.3101	127.505	105.771	93.9361
571	P26043	101.1	90.3659	94.7309	105.5	85.6608	85.9067	108.317	99.0926	97.2371	117.502	116.963	89.4344
572	P26048	NA	NA	NA	73.6	81.6698	85.3595	NA	NA	NA	164.767	100.427	99.5383
573	P26231	93	91.4249	97.6385	NA	NA	NA	99.627	102.904	106.115	NA	NA	NA
574	P26339	112.1	92.6604	88.8219	90.1	102.598	90.7401	105.938	102.101	88.676	103.103	97.2	114.844
575	P26369	93.4	88.601	94.2619	NA	NA	NA	110.076	104.609	100.514	NA	NA	NA
576	P26443	100.9	97.0728	105.517	107	103.864	87.0922	101.903	91.1692	92.1638	98.2667	113.03	89.4344
577	P26450	108.5	82.0706	88.8219	NA	NA	NA	106.662	96.9864	109.92	NA	NA	NA
578	P26516	NA	NA	NA	93.3	89.5545	82.2589	NA	NA	NA	117.612	112.325	106.141
579	P26638	NA	NA	NA	96.7	91.3066	82.8972	NA	NA	NA	114.754	117.064	98.1377
580	P26645	94	91.3367	104.11	102.9	87.705	82.9884	101.386	108.119	90.5784	126.735	111.82	89.8346
581	P26883	129.8	77.6582	85.0702	104.5	94.8109	85.3595	93.3162	85.352	122.815	137.068	95.7884	84.8326
582	P27545	91.5	84.1003	108.987	NA	NA	NA	109.145	95.0807	102.31	NA	NA	NA
583	P27546	82.8	87.3655	89.0095	72.7	77.9708	130.319	105.627	112.332	115.522	109.258	75.9249	129.65
584	P27601	90.8	83.5708	88.7282	99.9	86.0502	76.0575	112.766	107.016	110.132	132.121	108.695	100.339
585	P27612	121.1	80.1292	80.2868	84.1	77.3867	73.0481	96.5233	89.6647	126.62	162.569	113.232	96.0369
586	P27659	91.5	85.6888	96.6068	103.2	91.988	91.8344	107.593	111.329	98.7168	108.599	105.972	97.8376
587	P27661	89.6	104.486	90.3226	NA	NA	NA	116.18	93.476	95.3346	NA	NA	NA
588	P27671	104.6	87.2773	91.5419	83.6	98.3152	88.825	105.42	93.8772	109.286	125.416	97.3009	107.341
589	P27773	94.1	93.5429	104.673	100.8	94.5189	89.3722	105.11	105.612	86.1394	117.063	104.561	94.0362
590	P28028	112.5	79.4232	82.913	NA	NA	NA	101.8	96.4849	121.124	NA	NA	NA
591	P28184	88.5	96.1903	130.841	81.9	113.501	70.4946	91.5575	95.9834	83.2857	167.185	100.527	72.4279
592	P28271	NA	NA	NA	84.6	92.28	80.3437	NA	NA	NA	125.746	106.577	112.643
593	P28474	NA	NA	NA	118.1	97.2445	71.2241	NA	NA	NA	94.6394	113.232	105.541
594	P28571	99	91.4249	97.6385	101.3	90.8199	77.1519	95.2819	107.116	99.7737	126.076	110.207	96.9373
595	P28650	106.5	88.5127	77.473	65.6	66.4845	125.395	107.076	109.724	103.262	92.5509	82.378	162.763
596	P28652	113	86.3065	95.9502	91.7	99.678	95.0263	94.3508	89.3639	112.668	110.138	102.746	99.5383
597	P28656	94.1	88.3362	98.295	84.9	83.2273	89.0986	96.9372	99.3935	114.465	129.923	108.392	106.241
598	P28658	120.7	78.8937	78.5985	NA	NA	NA	97.5579	88.8624	130.213	NA	NA	NA
599	P28660	108.5	84.7181	89.6661	101.8	94.0322	82.0765	97.1441	101.5	110.766	118.492	111.316	93.4359
600	P28661	106.5	85.0711	93.8868	93.3	82.0592	73.5952	101.903	96.6855	107.912	149.159	113.03	93.8361
601	P28663	117.6	87.8067	93.5116	104	90.1385	90.3753	92.6955	93.0748	106.432	104.092	110.812	99.7384
602	P28667	NA	NA	NA	93.1	77.3867	86.6363	NA	NA	NA	102.773	128.457	111.543
603	P28738	107.2	83.3943	88.1654	99.1	100.359	88.5514	104.179	96.3846	113.619	117.173	98.7125	96.237
604	P28740	99.1	98.4847	98.764	92.3	96.7578	83.262	100.558	95.5822	96.7086	124.427	108.09	96.6372
605	P28741	113.7	93.7194	83.1006	97	90.5279	80.5261	94.6612	90.9686	115.522	131.792	107.081	95.6368
606	P28798	85.5	82.1589	89.4785	NA	NA	NA	106.558	112.833	116.579	NA	NA	NA
607	P28867	103.8	115.87	88.7282	91.1	99.2887	94.5703	89.4884	85.5526	104.213	133.111	89.537	93.3359
608	P29341	110.2	93.3664	83.1944	87.4	88.9704	89.9193	99.9373	85.6529	119.855	105.192	92.8643	134.852
609	P29351	101.5	89.3952	90.2288	NA	NA	NA	103.041	99.3935	108.229	NA	NA	NA
610	P29387	93.9	82.5119	99.7019	109.6	87.8023	123.206	113.697	107.618	94.0663	103.103	106.678	65.5252
611	P29595	NA	NA	NA	78.3	94.1295	92.9288	NA	NA	NA	135.529	106.073	94.6364
612	P29758	NA	NA	NA	98.7	94.1295	81.3469	NA	NA	NA	125.526	111.014	91.2351
613	P29788	NA	NA	NA	82.8	94.0322	92.8376	NA	NA	NA	153.446	106.678	73.5283
614	P29832	NA	NA	NA	137.3	99.8727	81.4381	NA	NA	NA	74.7442	98.3092	105.441
615	P30275	110.2	89.8364	94.6371	93.1	95.979	95.9383	93.4197	105.712	96.6029	124.427	92.7635	97.9377
616	P30416	NA	NA	NA	99.6	103.961	66.7555	NA	NA	NA	119.481	109.4	103.24
617	P30674	NA	NA	NA	87.9	96.6604	83.0796	NA	NA	NA	124.647	106.073	103.14
618	P30678	NA	NA	NA	94.3	88.289	78.3374	NA	NA	NA	148.279	106.174	88.8342
619	P30999	97.6	88.7775	97.9199	85.4	84.006	66.7555	105.627	96.5852	104.53	182.244	93.4693	96.7372
620	P31230	92.6	84.9828	92.9488	NA	NA	NA	109.145	105.211	107.384	NA	NA	NA
621	P31324	99.3	88.8657	100.452	107.1	95.5897	76.9695	103.351	104.007	94.3834	130.253	108.493	84.1324
622	P31648	100.3	100.867	101.578	97.5	100.457	89.281	97.351	102.503	85.2938	107.06	114.543	90.3347
623	P31650	95.5	84.8946	96.8881	106.2	90.2359	80.4349	109.972	111.73	92.2695	132.451	102.847	90.5348
624	P31786	98.3	87.4537	110.488	105.6	88.289	87.7306	107.49	100.998	84.871	121.24	116.358	81.9315
625	P31938	162.9	65.5682	63.3103	83.3	93.0588	92.3816	74.0736	76.4257	155.896	146.96	88.0245	98.838
626	P31996	NA	NA	NA	90.1	96.6604	68.3059	NA	NA	NA	165.317	96.8975	89.2343
627	P32020	96.7	88.0715	96.3254	124.6	87.997	71.0417	107.593	104.91	97.4484	111.897	112.022	94.2362
628	P32037	97.2	93.6311	100.64	92.3	91.3066	79.7966	103.662	103.806	90.5784	112.996	119.08	105.441
629	P32115	NA	NA	NA	122.2	115.447	48.4251	NA	NA	NA	104.312	146.304	66.1254
630	P32211	94	88.7775	98.3888	NA	NA	NA	105.11	113.535	90.6841	NA	NA	NA
631	P32233	95.7	104.662	92.0109	NA	NA	NA	96.7303	101.299	98.5054	NA	NA	NA
632	P32848	NA	NA	NA	95.8	88.4837	88.1866	NA	NA	NA	139.926	97.805	92.4356
633	P32883	94.6	94.3371	98.3888	93.5	91.696	81.5293	107.903	103.907	90.4727	133.66	106.981	95.2366
634	P32921	164.9	68.0392	72.033	NA	NA	NA	76.0393	78.7325	136.555	NA	NA	NA
635	P33173	111.5	81.4529	86.6647	113.8	88.9704	66.9379	100.662	91.4701	121.758	138.607	103.855	92.3355
636	P33175	101.6	92.1309	98.2012	NA	NA	NA	98.489	97.2872	102.627	NA	NA	NA
637	P34152	109.4	81.0116	97.4509	NA	NA	NA	99.9373	90.0659	114.571	NA	NA	NA
638	P34884	97.8	77.57	89.5723	NA	NA	NA	108.834	100.096	120.278	NA	NA	NA
639	P34914	NA	NA	NA	104.3	135.305	56.8152	NA	NA	NA	108.269	88.2262	108.442
640	P35235	124.9	80.4822	80.3806	95.2	87.0236	75.2368	93.937	88.6618	125.668	144.212	101.838	100.739
641	P35276	NA	NA	NA	106.9	97.6338	89.281	NA	NA	NA	104.642	93.5702	106.941
642	P35278	101.5	94.2488	87.9778	101.2	100.262	99.2213	101.075	99.9952	106.221	96.2882	80.5631	119.446
643	P35279	100	88.1597	87.6026	98.3	98.3152	86.8187	101.282	101.7	113.619	104.532	112.929	98.5379
644	P35282	95.5	90.2777	93.793	94.4	90.0412	88.369	109.041	100.396	102.416	115.084	106.376	105.941
645	P35283	104.8	90.1012	87.7902	106.6	95.8817	82.9884	101.696	99.5941	107.701	116.843	112.123	86.5333
646	P35285	97.2	91.4249	92.6675	105	92.3774	87.457	107.696	97.889	104.424	107.939	115.148	91.8353
647	P35288	100.4	91.5132	92.7612	104.7	98.0232	94.8439	106.455	95.8831	104.107	76.1732	116.862	105.441
648	P35290	98.1	89.1305	95.1061	93.2	77.6788	89.7369	104.593	100.396	104.001	122.888	113.333	104.44
649	P35293	95.8	88.601	94.3557	93.1	93.1561	105.24	108.731	102.402	101.359	104.312	98.7125	103.04
650	P35438	90.9	86.2183	102.61	95.3	88.7757	76.0575	111.421	106.314	93.3264	131.462	115.249	96.237
651	P35486	105.4	98.926	86.1019	101	99.97	91.0137	101.593	92.0718	106.538	112.666	107.989	86.9334
652	P35492	NA	NA	NA	137.1	123.819	47.0572	NA	NA	NA	71.5566	98.9141	120.947
653	P35564	99.1	92.6604	99.6081	97.5	91.8907	98.2182	101.903	106.214	90.1557	95.6286	108.493	105.841
654	P35569	95.9	94.4253	82.3502	NA	NA	NA	101.903	105.311	111.928	NA	NA	NA
655	P35585	128	73.1576	75.3158	91.2	95.687	73.8688	89.7988	85.8535	144.165	128.054	110.812	103.14
656	P35700	147	70.7749	72.4082	137.4	122.067	57.1799	84.2122	85.9538	135.815	75.8434	99.4183	106.741
657	P35762	93.9	88.0715	107.205	97	103.474	93.5672	110.8	104.91	84.871	92.6609	120.895	89.8346
658	P35802	92.6	87.189	110.019	105.3	94.1295	86.3627	107.696	107.718	84.2369	108.159	114.039	91.8353
659	P35803	94.2	86.9243	101.953	106.4	96.4657	89.0986	108.834	108.52	90.05	102.444	119.181	85.4329
660	P35821	92.6	91.4249	95.8564	NA	NA	NA	114.524	97.7887	98.8224	NA	NA	NA
661	P35822	91	99.8085	97.4509	96.3	74.1745	79.067	107.076	98.0896	95.9688	146.741	108.594	99.7384
662	P35922	94.3	84.0121	94.6371	99.5	87.1209	99.5861	104.076	105.913	109.392	110.358	86.4112	115.745
663	P35951	NA	NA	NA	88.8	85.4661	67.7587	NA	NA	NA	191.367	78.1432	97.4375
664	P35979	89.4	87.2773	97.2633	99.4	90.0412	85.1771	113.18	104.91	99.3509	125.197	103.451	98.2378
665	P35980	91.1	92.3074	92.0109	93.5	89.7492	82.7148	103.041	106.214	106.538	127.395	104.661	103.94
666	P36536	156.8	63.8033	57.5889	NA	NA	NA	73.6598	79.0334	168.579	NA	NA	NA
667	P36552	NA	NA	NA	98.1	95.4923	84.3564	NA	NA	NA	116.733	121.097	85.0327
668	P36916	102	75.5403	79.6302	114.1	90.4306	76.7871	102.213	103.606	132.644	111.457	111.82	96.4371
669	P37040	95.9	92.7486	98.2012	104.7	93.8375	77.2431	104.282	105.612	93.3264	113.545	114.24	97.6376
670	P37172	NA	NA	NA	98.5	90.8199	83.8092	NA	NA	NA	120.14	105.166	102.74
671	P38060	98.2	90.2777	98.4826	101.1	98.0232	84.4476	106.041	92.9745	104.847	106.95	115.954	93.2359
672	P38647	NA	NA	NA	110.7	95.103	89.281	NA	NA	NA	110.248	99.3175	94.9365
673	P39053	116.3	80.8351	84.5075	93.9	107.465	80.7997	96.9372	93.7769	121.441	120.14	101.838	96.8372
674	P39054	119.1	85.8653	81.3185	NA	NA	NA	112.766	91.1692	102.627	NA	NA	NA
675	P39447	86.8	93.4546	97.6385	97	89.7492	86.9099	101.489	102.202	109.18	142.893	92.5619	93.7361
676	P39688	101.8	87.2773	94.5433	88.5	91.988	77.8814	106.248	99.1929	102.416	151.357	103.25	91.5352
677	P39876	96	92.4839	104.579	NA	NA	NA	96.5233	96.184	104.001	NA	NA	NA
678	P40124	120.3	82.4236	85.8206	94.1	90.7226	79.4318	92.799	91.3698	120.489	139.376	101.435	98.2378
679	P40142	101.3	89.1305	98.3888	112.9	98.8993	83.6268	102.834	102.001	96.92	114.095	101.637	89.0342
680	P40237	89.5	91.8661	108.425	NA	NA	NA	109.559	106.615	83.0743	NA	NA	NA
681	P40336	NA	NA	NA	85	87.8023	89.281	NA	NA	NA	137.178	106.174	96.9373
682	P40630	113	93.8076	92.0109	90.8	96.2711	76.8783	111.524	84.4493	95.6517	141.464	102.242	95.9369
683	P41105	92	92.5721	98.6702	103.7	94.6162	90.0105	105.007	104.208	97.7655	103.433	100.326	106.741
684	P41216	99.3	92.5721	101.484	107.6	94.4216	77.2431	99.5235	97.0867	99.9851	120.47	108.09	93.8361
685	P41234	100.8	90.6307	95.4812	88.9	83.0326	77.1519	105.007	100.296	98.5054	140.695	124.827	89.4344
686	P41241	100.2	93.2781	93.9806	NA	NA	NA	103.972	91.2695	108.335	NA	NA	NA
687	P41242	115	95.1313	64.7172	94.2	88.0943	85.3595	117.421	93.3757	107.489	136.518	98.8133	99.4382
688	P42232	116.3	87.7185	80.8495	NA	NA	NA	97.9717	97.0867	112.562	NA	NA	NA
689	P42567	100.4	108.016	77.3792	89.2	80.599	70.8593	113.904	85.1514	105.375	165.866	106.88	93.636
690	P42669	98	82.0706	89.6661	98.4	101.528	85.1771	104.282	103.606	115.416	115.194	98.7125	101.239
691	P42859	102	85.6888	82.444	89.5	83.9086	76.6047	103.558	95.7828	124.189	148.829	107.283	98.6379
692	P42932	117.5	80.9234	86.2895	104.9	96.4657	77.2431	97.5579	91.8713	119.221	114.754	107.081	100.739
693	P43006	95.1	89.307	107.205	107.4	94.3242	95.5735	106.145	108.621	82.9686	93.9799	100.124	106.241
694	P43024	NA	NA	NA	88.8	96.8551	91.2873	NA	NA	NA	124.427	103.451	95.9369
695	P43276	85.4	85.3358	79.9116	NA	NA	NA	131.698	112.231	98.8224	NA	NA	NA
696	P43277	NA	NA	NA	70.7	82.6432	97.8534	NA	NA	NA	142.564	98.1075	110.042
697	P43406	92.5	90.1894	110.394	102.4	86.9262	74.5984	108.731	98.1899	89.3101	152.896	105.166	83.132
698	P45376	95.3	91.3367	99.7957	107.1	86.6342	80.9821	106.248	95.0807	102.839	118.272	107.384	100.939
699	P45591	94.1	94.8666	92.6675	NA	NA	NA	100.558	100.396	108.123	NA	NA	NA
700	P45878	94.3	95.6608	96.9819	93.3	87.3156	96.9414	102.42	104.107	96.1801	116.403	100.83	104.84
701	P46096	93.4	94.5136	96.9819	99.2	100.651	94.2055	103.144	103.405	98.7168	113.765	87.9237	103.44
702	P46097	95.7	94.4253	97.7323	108.9	96.7578	91.3785	101.903	101.399	98.8224	100.905	107.485	93.0358
703	P46460	126.7	74.3048	73.8151	99.4	97.8285	87.2746	89.6953	90.4671	140.994	116.293	104.056	95.4367
704	P46471	102.9	87.6302	92.9488	99.2	94.9083	78.9758	105.007	96.6855	106.432	110.138	116.055	101.339
705	P46638	96.9	92.8369	94.4495	108.1	98.4126	82.5324	101.593	102.302	102.627	103.763	104.157	102.639
706	P46660	85.1	68.8334	73.9089	NA	NA	NA	115.766	111.93	142.262	NA	NA	NA
707	P46735	98.9	95.0431	104.392	114.4	91.1119	69.0354	94.2473	95.2813	101.465	134.32	103.552	91.4352
708	P46935	NA	NA	NA	93.8	89.2624	85.7243	NA	NA	NA	130.912	102.242	99.9384
709	P46978	NA	NA	NA	93.5	87.2183	73.96	NA	NA	NA	143.003	115.45	91.2351
710	P47199	103.1	90.9837	94.4495	NA	NA	NA	95.075	96.5852	110.871	NA	NA	NA
711	P47212	86.3	85.777	94.2619	NA	NA	NA	108.731	97.3875	120.384	NA	NA	NA
712	P47708	100.6	85.8653	90.5102	92.9	94.1295	87.0922	105.11	101.299	108.863	118.492	106.88	101.139
713	P47738	NA	NA	NA	105.1	97.2445	76.9695	NA	NA	NA	132.011	101.334	90.0346
714	P47740	95.1	93.7194	100.077	97.8	83.0326	80.0702	110.49	102.202	87.9361	152.456	103.25	88.1339
715	P47746	96	98.0435	91.2606	NA	NA	NA	96.4199	109.323	98.7168	NA	NA	NA
716	P47753	105.2	86.0418	99.1392	93	90.0412	83.5356	92.4886	94.479	114.148	120.91	118.878	95.1366
717	P47754	102.9	92.6604	100.827	101.6	97.2445	78.0638	95.1784	93.2754	105.27	117.722	118.677	88.2339
718	P47757	104.4	90.9837	98.1074	97.7	94.1295	83.718	97.2475	91.9716	107.912	112.666	114.24	97.9377
719	P47758	NA	NA	NA	92.9	76.9974	73.4128	NA	NA	NA	166.306	110.61	86.6333
720	P47759	NA	NA	NA	112.9	88.289	85.5419	NA	NA	NA	92.441	112.425	107.041
721	P47791	NA	NA	NA	82.6	79.723	84.4476	NA	NA	NA	166.306	103.451	88.9342
722	P47802	NA	NA	NA	96.8	91.5987	82.9884	NA	NA	NA	137.837	109.602	84.1324
723	P47809	141.1	71.3044	72.4082	93.4	91.5987	90.0105	88.8677	80.939	141.839	111.677	105.468	107.641
724	P47856	94.5	97.514	96.044	89.8	84.298	72.6833	106.558	98.6914	96.2858	165.646	102.443	91.6352
725	P47857	96.9	87.2773	90.7916	100.2	94.3242	85.5419	107.593	103.506	106.01	115.744	102.342	102.339
726	P47867	97.7	94.7783	98.3888	95	84.4927	89.6457	100.041	99.6944	99.2452	136.518	101.838	94.9365
727	P47878	91.6	101.75	94.9185	79.3	108.536	99.6773	94.8681	101.6	104.424	137.178	54.8515	120.746
728	P47911	89.3	87.3655	99.5143	105.3	93.5455	82.8972	107.696	110.025	97.0257	112.776	107.081	98.9381
729	P47915	84.7	93.4546	96.8881	97.4	91.5987	102.14	106.662	111.028	97.5541	106.73	87.6212	112.543
730	P47941	NA	NA	NA	91.6	87.997	74.7808	NA	NA	NA	137.507	109.703	102.139
731	P47955	89.9	83.9238	101.765	105	82.1565	69.1266	111.11	100.196	104.847	145.202	103.048	100.539
732	P47962	86.7	87.189	96.7006	113.7	100.359	67.6675	110.8	109.222	100.725	91.0121	131.583	95.7368
733	P47963	88.6	90.1012	96.513	96	98.5099	88.9162	108.938	107.317	99.3509	108.599	102.746	104.74
734	P47964	95.8	84.1886	99.8895	121.4	89.1651	77.6079	107.903	107.317	96.0744	89.9129	128.861	92.4356
735	P48036	103.5	96.0138	107.956	99.1	100.749	90.4665	97.351	93.0748	90.6841	116.513	106.275	86.8334
736	P48193	102.8	96.3668	98.3888	95.4	82.7405	76.5135	92.5921	105.512	93.4321	154.984	106.275	89.2343
737	P48318	106.1	100.073	100.171	104.2	105.713	86.7275	96.5233	88.2606	97.5541	109.808	101.536	91.5352
738	P48320	97.1	96.7198	104.954	106.3	106.395	94.1143	100.972	85.9538	103.684	97.6072	107.686	85.733
739	P48453	127.4	77.3935	82.8192	85.5	93.5455	83.0796	93.8335	87.6588	125.246	133.221	111.518	95.5367
740	P48542	105.7	80.3057	100.546	NA	NA	NA	114.007	103.104	87.8304	NA	NA	NA
741	P48722	118.9	80.5704	83.6633	83	84.59	63.1077	93.8335	91.3698	125.668	189.169	107.586	82.0316
742	P48758	102.1	87.895	92.4799	131.6	97.8285	76.0575	105.007	99.4938	104.53	95.7386	112.728	85.733
743	P48771	101.5	84.1003	104.954	102.2	101.041	89.0074	109.972	93.8772	96.7086	108.049	114.039	85.0327
744	P48774	108.6	96.102	93.5116	87.9	88.9704	86.8187	104.076	91.6707	96.0744	144.762	109.602	85.1327
745	P48962	114.5	93.7194	85.8206	118.7	95.0056	87.3658	86.7986	91.1692	119.432	99.5857	109.4	88.8342
746	P49025	98.3	91.0719	94.7309	87.8	90.5279	83.5356	105.007	99.5941	102.31	118.931	117.568	102.74
747	P49070	90.6	92.0426	98.1074	96.4	92.0854	114.269	117.214	100.396	92.1638	90.7923	98.1075	103.74
748	P49429	NA	NA	NA	110.9	137.933	55.812	NA	NA	NA	125.087	78.244	94.8365
749	P49443	121.8	84.5416	92.855	97.3	94.9083	83.5356	103.351	89.765	99.2452	114.535	116.559	93.8361
750	P49446	NA	NA	NA	91.6	90.5279	83.6268	NA	NA	NA	132.891	105.771	97.9377
751	P49586	NA	NA	NA	98.4	81.2804	76.6047	NA	NA	NA	128.934	100.427	117.245
752	P49615	118.1	83.3943	81.8813	115.5	92.5721	74.9632	93.4197	91.5704	125.246	133.331	107.989	78.8303
753	P49722	102.6	83.6591	80.7557	107.2	95.5897	63.4725	114.007	119.653	91.9524	94.0898	99.4183	140.854
754	P49813	94.9	90.1894	104.11	95.9	88.0943	79.7966	106.248	94.2784	100.514	129.813	111.518	97.5375
755	P49962	84.1	83.5708	79.9116	NA	NA	NA	110.386	105.612	130.953	NA	NA	NA
756	P50153	93.6	84.8946	96.9819	110	83.2273	80.7997	111.007	109.925	95.0175	117.832	113.434	96.237
757	P50172	110.2	95.2196	92.6675	NA	NA	NA	98.2821	93.3757	100.408	NA	NA	NA
758	P50247	NA	NA	NA	150.1	145.039	58.1831	NA	NA	NA	83.2079	76.1266	85.9331
759	P50396	113.3	88.5127	89.7599	94.5	89.4571	88.4602	95.6957	98.6914	105.481	123.658	111.619	93.536
760	P50446	NA	NA	NA	98.5	138.225	93.6584	NA	NA	NA	70.8971	57.1706	135.552
761	P50516	98.9	98.8377	99.0454	103.2	98.2179	88.9162	97.5579	97.889	96.8143	106.401	105.166	97.3374
762	P50518	98.1	98.4847	100.64	95.1	105.032	96.4854	99.7304	96.5852	95.546	97.2774	97.805	105.641
763	P50544	93.2	90.8954	98.4826	106.4	95.7844	76.6047	105.834	102.703	99.5623	123.218	107.283	92.6356
764	P50580	82.2	72.3633	83.4757	96.9	82.9352	71.7713	120.421	126.574	110.132	175.429	103.956	76.5294
765	P50586	95.1	92.1309	80.5682	NA	NA	NA	115.973	98.9923	109.709	NA	NA	NA
766	P51141	111.9	103.78	83.382	98.5	87.2183	80.1613	96.9372	89.3639	104.424	146.741	95.7884	95.6368
767	P51150	92.8	92.9251	96.3254	103	97.9259	86.0891	105.938	101.901	100.619	110.797	109.703	92.5356
768	P51174	NA	NA	NA	71.2	114.669	85.2683	NA	NA	NA	134.65	87.117	108.542
769	P51410	83.7	87.9832	90.0413	105	89.8465	80.9821	107.283	111.329	111.928	119.591	109.804	96.137
770	P51432	104.8	84.7181	104.673	NA	NA	NA	120.421	93.6766	82.3344	NA	NA	NA
771	P51660	98.8	93.1016	98.3888	100.1	95.103	79.6142	104.489	104.609	90.4727	122.888	110.005	94.0362
772	P51791	96.1	91.1602	97.9199	113.4	87.6076	75.5103	103.248	102.001	100.091	128.274	105.367	92.6356
773	P51830	94.8	94.6901	102.61	71.9	67.5552	94.8439	104.282	101.801	91.1069	152.017	80.3614	136.753
774	P51863	94.1	99.1907	98.3888	98.4	98.3152	108.523	98.489	102.302	96.7086	101.344	92.3602	97.8376
775	P51880	111	82.9531	94.3557	NA	NA	NA	104.489	91.8713	107.489	NA	NA	NA
776	P51881	NA	NA	NA	109	96.6604	80.8909	NA	NA	NA	113.985	111.215	88.9342
777	P51910	98.2	86.6595	92.0109	NA	NA	NA	114.111	98.5911	102.416	NA	NA	NA
778	P52196	NA	NA	NA	97.6	78.1655	82.7148	NA	NA	NA	126.626	103.048	114.044
779	P52479	123.9	74.3048	78.4109	90.8	93.6428	75.9663	93.8335	99.3935	125.246	133.77	108.392	100.639
780	P52480	101.6	86.0418	93.6992	99.5	91.5987	85.6331	104.386	102.804	103.05	116.513	116.358	90.935
781	P52503	NA	NA	NA	88.7	87.1209	97.8534	NA	NA	NA	127.395	101.334	98.1377
782	P52633	NA	NA	NA	86	76.4133	61.9221	NA	NA	NA	196.643	106.476	83.232
783	P52760	103.8	91.5132	101.953	120.4	105.519	60.463	100.558	96.7858	95.1232	133.44	103.754	80.631
784	P52800	113.7	91.0719	88.2592	NA	NA	NA	94.3508	98.7917	105.058	NA	NA	NA
785	P52875	NA	NA	NA	93.9	92.1827	82.4412	NA	NA	NA	127.175	113.03	93.2359
786	P53026	88.6	87.8067	94.8247	106	87.0236	83.6268	111.628	111.329	97.2371	102.114	123.214	97.8376
787	P53395	NA	NA	NA	110.2	79.1389	73.96	NA	NA	NA	129.813	131.079	79.2305
788	P53657	NA	NA	NA	103.1	110.872	60.2806	NA	NA	NA	121.13	102.342	105.24
789	P53668	108.2	79.0702	94.7309	NA	NA	NA	112.145	93.6766	105.058	NA	NA	NA
790	P53702	NA	NA	NA	94.1	95.4923	77.7902	NA	NA	NA	116.513	122.71	94.7364
791	P53798	94.2	95.1313	99.9833	NA	NA	NA	100.765	96.6855	103.262	NA	NA	NA
792	P53810	163.5	65.48	61.7158	106.9	79.2362	75.5103	72.8322	76.5259	158.222	135.419	117.265	89.3344
793	P53811	134.8	78.0995	70.2509	NA	NA	NA	88.6608	89.4641	134.124	NA	NA	NA
794	P53986	106.4	99.1025	95.9502	96.2	84.8821	78.8846	96.7303	102.202	88.3589	150.698	111.215	82.7318
795	P53994	96	93.3664	91.7295	103.3	99.5807	90.7401	104.8	103.104	101.782	103.763	101.939	99.4382
796	P53995	93.6	91.0719	101.578	NA	NA	NA	106.455	100.296	97.2371	NA	NA	NA
797	P53996	NA	NA	NA	110.3	96.3684	84.174	NA	NA	NA	108.269	95.3851	105.341
798	P54071	107.4	96.3668	101.672	96.3	93.1561	79.8878	100.041	88.1603	95.6517	128.494	112.425	92.0354
799	P54227	96.2	91.8661	102.047	NA	NA	NA	102.213	102.804	94.7004	NA	NA	NA
800	P54285	95.9	94.4253	85.0702	NA	NA	NA	109.352	100.497	106.327	NA	NA	NA
801	P54310	89.7	81.5411	85.9144	NA	NA	NA	103.144	110.125	123.343	NA	NA	NA
802	P54728	121	100.426	95.575	NA	NA	NA	92.0748	91.771	87.5134	NA	NA	NA
803	P54754	102.8	88.954	94.9185	NA	NA	NA	113.593	102.503	87.9361	NA	NA	NA
804	P54763	94.2	88.5127	105.517	NA	NA	NA	102.524	111.529	87.1963	NA	NA	NA
805	P54775	104.9	91.5132	88.2592	106.7	98.5099	65.7524	102.213	95.3816	109.286	107.61	115.854	107.241
806	P54818	103	90.0129	95.1061	95.1	104.253	74.872	100.144	97.7887	104.953	128.494	112.526	87.2336
807	P54822	84.6	83.7473	97.4509	88.9	83.2273	73.0481	120.318	102.603	103.473	144.542	115.45	99.4382
808	P54823	98.3	89.2187	84.5075	97	99.5807	81.2557	104.8	102.603	112.985	117.392	102.544	103.14
809	P54830	94.3	85.0711	93.8868	NA	NA	NA	104.282	95.9834	119.01	NA	NA	NA
810	P54923	136.9	77.6582	77.7544	NA	NA	NA	84.5226	86.9567	130.847	NA	NA	NA
811	P55012	92.9	89.0422	104.861	93.7	95.4923	86.5451	109.455	106.314	87.4077	108.379	110.005	105.641
812	P55066	93.9	81.7176	99.0454	84.3	72.4223	106.426	104.696	102.904	110.026	134.65	90.8477	111.943
813	P55088	103.8	95.2196	101.39	87.1	84.2007	95.2999	92.9024	102.904	92.6923	96.9477	108.392	126.249
814	P55096	98.1	93.7194	108.237	99.2	86.1475	85.0859	104.076	106.013	78.3181	118.492	115.854	96.237
815	P55104	NA	NA	NA	108.8	93.2535	72.5921	NA	NA	NA	130.363	105.166	92.9357
816	P55194	NA	NA	NA	97.9	82.0592	69.6738	NA	NA	NA	154.874	103.451	97.9377
817	P55258	98.1	88.3362	86.3833	113.3	92.7668	66.2995	107.696	98.892	113.197	142.124	108.291	81.9315
818	P55264	NA	NA	NA	116.3	156.428	59.6422	NA	NA	NA	113.216	76.9332	78.3301
819	P55288	97.8	93.5429	85.8206	NA	NA	NA	104.282	105.311	104.636	NA	NA	NA
820	P55302	94	92.9251	102.797	100.1	91.8907	86.8187	103.041	108.621	87.9361	102.993	124.021	93.636
821	P55772	99.3	89.9247	110.394	NA	NA	NA	101.593	97.0867	91.0012	NA	NA	NA
822	P55821	NA	NA	NA	108	94.0322	83.262	NA	NA	NA	109.149	113.938	91.9354
823	P55937	105	81.0999	86.4771	NA	NA	NA	102.42	114.438	103.367	NA	NA	NA
824	P56135	NA	NA	NA	92.7	103.961	94.6615	NA	NA	NA	112.116	103.653	91.8353
825	P56371	99.8	90.4542	87.7902	116.2	87.8997	79.979	104.179	102.503	106.855	128.164	100.729	89.3344
826	P56379	NA	NA	NA	59.6	89.2624	126.58	NA	NA	NA	111.677	80.3614	128.649
827	P56380	116.8	87.0125	77.2854	NA	NA	NA	99.3166	94.3787	118.376	NA	NA	NA
828	P56382	NA	NA	NA	111.2	105.421	120.379	NA	NA	NA	115.084	54.4482	89.9346
829	P56383	108.8	89.6599	95.2937	58.5	113.209	189.232	105.524	97.889	93.4321	81.1195	28.0307	116.245
830	P56391	90.7	82.7766	89.7599	113	96.5631	85.8155	106.145	109.423	114.359	107.28	114.24	82.8319
831	P56395	95.8	95.7491	93.324	103.7	101.333	80.4349	102.006	108.019	95.1232	119.811	101.334	94.5364
832	P56399	116	76.9522	87.6026	NA	NA	NA	102.11	94.8801	116.579	NA	NA	NA
833	P56480	95.8	91.6014	99.0454	107.2	102.696	88.0042	111.628	84.5496	108.44	102.883	112.829	85.3328
834	P56564	97.7	93.2781	100.734	98.8	98.8019	97.0326	102.213	108.52	86.8792	97.0576	114.543	91.3351
835	P56657	NA	NA	NA	84.4	100.749	63.7461	NA	NA	NA	133.331	106.678	115.144
836	P56695	96.9	91.9544	96.7943	94.2	86.2449	92.0168	105.938	104.709	93.9606	120.69	96.6959	110.743
837	P56818	98.1	97.867	87.1337	112.8	87.0236	78.2462	93.7301	108.821	104.636	126.076	109.905	88.434
838	P56942	NA	NA	NA	98.5	89.0678	79.979	NA	NA	NA	130.143	105.871	99.0381
839	P56959	85.5	78.6289	90.6978	96.8	96.1737	91.5609	119.387	117.046	101.993	116.073	95.4859	103.74
840	P57746	98.2	98.7495	92.9488	93.1	105.227	95.2087	97.9717	99.9952	101.993	107.17	90.3436	107.341
841	P57759	97.4	90.9837	98.764	106.9	98.5099	81.6205	110.49	104.408	88.0418	108.159	114.24	90.7349
842	P57776	NA	NA	NA	133	96.1737	60.0982	NA	NA	NA	101.234	94.5785	116.345
843	P57780	113.6	69.2747	86.3833	NA	NA	NA	101.696	101.6	122.709	NA	NA	NA
844	P58021	92.3	86.5713	90.0413	88.8	92.3774	85.3595	105.731	107.217	110.554	107.17	122.71	103.64
845	P58158	NA	NA	NA	104.7	104.837	74.5984	NA	NA	NA	112.116	112.728	92.1354
846	P58242	104.3	81.4529	85.3516	NA	NA	NA	117.732	98.1899	106.538	NA	NA	NA
847	P58252	142.6	68.2157	67.6247	94.6	97.9259	88.1866	86.0744	84.8505	148.181	99.5857	112.224	106.141
848	P58281	110.2	90.7189	86.1019	91.8	95.687	93.7496	99.0063	93.8772	111.823	111.897	106.476	99.8384
849	P58389	171.2	59.3909	55.8068	NA	NA	NA	71.2804	78.7325	163.295	NA	NA	NA
850	P58771	90.5	81.4529	102.422	99.6	103.085	94.2055	110.697	108.621	98.0826	95.4088	108.896	96.5371
851	P58854	105.4	93.9841	91.7295	87.4	83.4219	74.7808	106.765	92.1721	100.619	157.842	108.09	94.1362
852	P59016	99.4	90.6307	90.604	97.9	90.7226	81.3469	104.282	103.104	103.262	121.569	103.25	106.841
853	P59017	102.9	99.0142	84.6951	NA	NA	NA	106.662	93.9775	103.473	NA	NA	NA
854	P59108	NA	NA	NA	80.8	93.9349	74.7808	NA	NA	NA	167.955	82.1764	106.341
855	P59279	93.8	97.867	96.7943	68.3	105.227	103.325	106.041	101.6	93.3264	87.7146	114.039	117.345
856	P59281	99.2	87.0125	84.6013	100.1	85.3688	78.3374	107.386	101.6	112.985	134.54	107.787	97.0373
857	P59470	NA	NA	NA	141.1	82.6432	68.3059	NA	NA	NA	93.76	107.989	106.741
858	P59481	93.8	84.2768	97.9199	86.2	96.5631	76.9695	111.731	104.408	99.4566	134.54	109.4	99.3382
859	P59511	NA	NA	NA	63.3	109.315	86.4539	NA	NA	NA	158.612	86.3104	99.8384
860	P59644	101	93.5429	93.5116	94.3	98.7046	85.0859	102.731	98.5911	101.148	136.188	96.0909	91.9354
861	P59648	94.4	97.867	110.207	90.9	103.377	88.6426	102.006	101.299	81.9117	126.735	101.737	89.5344
862	P59759	89.4	81.2764	82.5378	NA	NA	NA	112.248	109.624	119.221	NA	NA	NA
863	P59764	98.4	92.1309	95.8564	100	84.7847	93.02	105.938	98.892	99.3509	116.293	108.291	97.8376
864	P59999	105.6	84.8063	89.1971	88.9	90.8199	88.369	104.903	97.9893	110.026	123.548	109.804	99.5383
865	P60041	98.5	95.4843	105.236	92.5	91.2093	102.048	99.2132	99.9952	90.3671	113.545	99.015	100.439
866	P60122	107.5	90.4542	90.5102	93.1	104.058	80.1613	99.627	86.6559	117.107	128.274	103.552	92.7357
867	P60202	90	88.8657	97.3571	123.4	97.3418	94.2055	112.766	119.954	81.2775	101.125	104.157	78.03
868	P60229	100	91.6896	94.8247	36.1	53.0513	70.7682	104.076	93.9775	106.432	97.1675	120.492	223.986
869	P60335	148.7	70.6866	67.2496	85.9	91.8907	78.5198	85.971	81.7413	142.473	135.639	106.779	104.24
870	P60469	128.9	79.1584	76.4413	79.2	92.5721	98.3094	91.7644	85.9538	132.75	143.663	87.2179	100.639
871	P60487	91.1	88.1597	92.1047	NA	NA	NA	112.042	102.202	106.327	NA	NA	NA
872	P60521	104.9	83.6591	93.6992	NA	NA	NA	104.179	99.3935	106.221	NA	NA	NA
873	P60710	115.3	83.4826	99.7957	99.6	105.811	88.6426	88.8677	87.4582	116.896	106.62	99.7208	98.6379
874	P60761	81	75.805	69.1254	53.9	71.5462	134.97	105.317	130.184	135.181	112.996	72.7992	149.658
875	P60764	90.9	87.9832	97.8261	93.1	87.8023	103.69	117.938	100.096	96.3915	88.3741	134.003	89.6345
876	P60766	103.5	90.1012	99.4206	98.1	93.9349	94.2055	103.972	99.3935	93.8549	99.8055	110.207	102.039
877	P60824	86.9	91.5132	86.1957	NA	NA	NA	110.076	114.939	101.888	NA	NA	NA
878	P60840	83.6	75.6285	84.4137	NA	NA	NA	123.525	112.432	115.31	NA	NA	NA
879	P60867	76.6	88.0715	87.415	96.7	86.1475	65.8436	108.628	115.24	116.684	110.358	133.095	110.242
880	P60879	97.6	95.3961	97.7323	92.3	96.4657	98.127	102.213	103.706	92.9037	112.226	96.1917	103.54
881	P60882	NA	NA	NA	101	84.9794	72.4097	NA	NA	NA	142.564	116.358	87.1335
882	P60904	101.3	98.4847	85.633	95.4	100.651	94.7527	91.8679	106.314	106.749	105.851	95.9901	105.941
883	P61021	93.8	90.6307	95.1999	99.6	90.2359	97.8534	109.662	100.396	101.359	113.435	99.1158	98.838
884	P61022	87.5	98.22	100.077	105.4	99.386	85.1771	103.455	105.712	94.172	100.025	112.728	96.237
885	P61027	97	91.8661	89.7599	117.6	89.5545	81.2557	102.42	102.703	107.595	121.24	98.5108	93.2359
886	P61028	99.4	87.2773	89.8537	95.8	105.129	86.5451	112.973	98.5911	104.107	109.368	106.678	96.0369
887	P61079	163.7	69.0982	68.1875	NA	NA	NA	76.1427	76.3254	143.425	NA	NA	NA
888	P61082	146	86.2183	65.0923	NA	NA	NA	78.4187	75.6233	143.53	NA	NA	NA
889	P61087	151	67.9509	61.7158	84.3	88.5811	82.7148	84.2122	85.7532	147.23	121.459	108.392	116.045
890	P61089	169.1	62.1266	57.8703	91.8	92.9614	92.108	72.2115	76.0245	161.921	118.382	107.182	97.8376
891	P61161	109	85.8653	89.6661	83.4	81.0857	66.3907	100.558	98.7917	108.335	169.274	112.123	95.3367
892	P61164	88.3	85.2475	89.4785	87.7	102.988	86.4539	115.766	104.308	109.603	101.125	133.297	87.5337
893	P61202	131.1	77.57	79.0675	NA	NA	NA	90.523	92.2724	123.766	NA	NA	NA
894	P61205	184.6	63.8915	59.2772	123.8	93.3508	68.9442	68.5905	71.812	150.083	99.2559	118.273	97.1374
895	P61211	132.3	88.8657	80.0992	NA	NA	NA	90.4195	87.4582	113.197	NA	NA	NA
896	P61222	101	88.6892	91.8233	97	86.9262	77.8814	106.041	97.0867	107.066	104.202	129.869	104.74
897	P61226	96.9	95.5726	97.2633	103.1	96.7578	84.63	103.351	105.11	91.2126	112.336	107.384	96.0369
898	P61255	91.5	95.7491	95.4812	100.8	93.0588	98.9477	101.489	108.119	97.6598	85.5162	106.577	111.643
899	P61264	97.9	95.3961	100.546	89.5	95.2003	109.071	101.489	101.801	92.1638	102.993	90.3436	109.942
900	P61290	NA	NA	NA	88.5	85.2714	73.96	NA	NA	NA	145.092	93.671	118.045
901	P61294	96.8	84.3651	88.9157	101.2	101.917	78.611	105.007	102.302	115.522	122.778	99.9224	97.3374
902	P61315	NA	NA	NA	87.5	81.8645	63.3813	NA	NA	NA	194.555	104.964	77.7299
903	P61329	97.9	97.161	85.5392	NA	NA	NA	98.2821	103.706	108.229	NA	NA	NA
904	P61358	92.3	87.4537	95.4812	102.5	90.1385	87.913	105.42	109.222	101.465	112.886	104.056	102.74
905	P61514	79.3	88.8657	85.7268	68	82.0592	124.118	105.007	119.754	113.831	112.996	74.9166	134.552
906	P61620	100.1	94.6018	90.4164	106.5	96.5631	79.3406	102.627	108.42	94.0663	113.655	119.483	85.4329
907	P61750	130.2	78.7172	78.5047	114.1	92.5721	72.9569	94.4542	87.1573	125.457	129.154	103.653	90.4348
908	P61759	NA	NA	NA	87.1	93.1561	87.913	NA	NA	NA	132.121	102.645	98.9381
909	P61804	110.7	95.9256	92.6675	NA	NA	NA	95.7992	89.6647	105.481	NA	NA	NA
910	P61922	116.5	83.8356	89.8537	97.8	93.5455	94.2967	103.041	90.3668	108.863	120.69	104.258	89.4344
911	P61963	93.8	86.2183	96.2316	84.2	89.8465	82.806	104.903	96.2843	114.676	136.738	103.855	105.341
912	P61967	112.7	95.3078	83.1006	NA	NA	NA	96.1095	90.2665	113.936	NA	NA	NA
913	P61979	129.5	60.4499	65.1861	141.6	103.572	53.3497	76.7635	81.1396	187.498	117.173	110.711	77.1297
914	P61982	104.9	85.8653	93.1364	103.1	90.6252	88.1866	99.2132	104.408	104.107	112.116	112.728	93.2359
915	P62069	108.3	90.8954	100.827	NA	NA	NA	95.6957	96.8861	97.3428	NA	NA	NA
916	P62071	95	89.5717	99.6081	86.8	80.307	79.979	104.696	106.715	94.8061	128.384	107.888	119.146
917	P62073	NA	NA	NA	108.5	99.5807	112.627	NA	NA	NA	79.2509	117.164	77.4298
918	P62082	77.4	84.0121	81.4123	113.6	87.6076	79.979	109.455	118.45	123.449	94.5295	123.214	100.539
919	P62137	102.9	90.1894	100.546	NA	NA	NA	95.7992	93.2754	107.912	NA	NA	NA
920	P62141	96.2	88.8657	97.4509	84.3	91.696	84.2652	103.558	97.9893	107.066	145.202	92.1585	105.741
921	P62192	95.5	85.777	89.9475	94.6	90.8199	87.0922	114.007	95.9834	111.506	106.62	105.569	114.944
922	P62196	98	89.4835	93.4178	100.4	88.7757	72.8657	108.834	96.184	105.481	119.701	110.812	109.742
923	P62242	92.7	87.4537	98.0137	93.9	95.395	81.4381	106.352	106.414	100.196	105.192	120.492	103.74
924	P62245	80.1	92.4839	98.295	109.3	95.0056	69.2178	108.834	106.615	104.424	99.9154	120.391	106.941
925	P62259	104.1	88.3362	96.1378	106.5	92.4747	88.7338	98.489	100.998	103.05	112.446	118.072	81.8315
926	P62264	90.7	93.8076	91.7295	92.3	84.6874	80.0702	104.8	104.308	105.587	132.451	110.711	102.639
927	P62267	84.8	92.2191	90.4164	73.8	71.2542	122.932	102.11	109.925	112.034	98.4865	88.1253	141.254
928	P62270	84.1	91.7779	84.8826	121.1	91.7933	68.4882	104.282	112.432	114.782	94.8592	127.147	97.1374
929	P62274	72.1	80.2174	79.6302	66.4	73.1037	126.307	113.18	123.465	126.514	144.762	93.4693	95.6368
930	P62281	83.5	92.8369	94.6371	99.6	88.8731	84.174	105.834	109.122	104.953	109.368	116.862	101.439
931	P62301	87	90.5424	94.9185	97.8	87.413	78.2462	107.076	106.615	105.058	125.307	107.989	105.541
932	P62317	NA	NA	NA	96.4	80.5017	84.3564	NA	NA	NA	121.02	97.5025	121.647
933	P62320	101.9	88.8657	101.296	NA	NA	NA	110.904	91.2695	96.3915	NA	NA	NA
934	P62331	102	95.7491	90.4164	102.5	89.2624	77.9726	92.0748	91.2695	119.327	125.966	108.594	98.0377
935	P62334	104.8	90.6307	86.7585	89.9	88.7757	71.8625	107.179	94.1781	108.44	136.738	107.989	108.542
936	P62482	95.8	88.601	99.7957	95	91.404	88.7338	103.765	103.806	98.9281	122.998	109.501	93.2359
937	P62484	101.1	85.6888	94.6371	97.9	95.7844	79.3406	103.662	100.497	106.115	135.309	107.686	86.7334
938	P62492	NA	NA	NA	61.5	59.4759	119.558	NA	NA	NA	99.5857	101.637	154.96
939	P62500	98.4	88.248	87.3213	NA	NA	NA	105.42	93.7769	119.644	NA	NA	NA
940	P62627	134.8	79.0702	90.2288	91.9	96.3684	78.155	93.1093	87.2576	108.229	125.526	117.064	93.1358
941	P62631	87.6	81.8941	86.3833	98.5	93.1561	90.3753	114.731	113.234	109.497	97.827	107.485	111.143
942	P62702	86.8	93.8076	87.6964	101.3	93.5455	83.9004	100.765	108.821	113.619	104.092	106.376	110.442
943	P62717	93.4	89.7482	96.7943	88.7	89.2624	113.266	103.869	108.42	98.5054	102.334	100.427	102.84
944	P62737	119.4	84.8063	96.7006	NA	NA	NA	85.764	86.0541	119.01	NA	NA	NA
945	P62743	109	98.4847	95.575	48	111.846	100.133	90.3161	97.5881	98.294	87.9344	131.281	117.145
946	P62746	93.7	94.6901	100.452	91.1	95.8817	110.53	104.593	103.907	92.1638	99.5857	105.266	94.3363
947	P62748	100.7	88.601	96.2316	97.1	88.3864	89.7369	104.282	100.798	100.408	118.492	115.349	91.5352
948	P62751	80.9	91.2484	87.6026	105.4	91.1119	80.7085	102.524	113.636	116.156	107.39	119.08	96.7372
949	P62754	92.2	93.1016	95.8564	78.5	80.9884	116.64	103.041	105.311	100.936	94.6394	87.8228	137.353
950	P62761	104.2	87.1008	100.265	105.7	89.1651	97.7622	100.248	100.697	98.1883	100.135	113.938	91.4352
951	P62774	96.1	93.1016	104.579	NA	NA	NA	109.559	95.9834	89.9443	NA	NA	NA
952	P62806	114.6	69.7159	77.3792	NA	NA	NA	147.113	100.296	86.3507	NA	NA	NA
953	P62812	97.6	89.3952	95.3875	101.5	84.9794	79.067	108.524	107.317	92.3752	130.912	111.82	94.5364
954	P62814	102.2	95.8373	97.1695	95.8	97.2445	97.5798	98.5924	95.8831	100.091	113.435	99.8216	95.2366
955	P62818	54.5	54.7137	50.8358	NA	NA	NA	320.813	54.4608	68.5944	NA	NA	NA
956	P62821	93.9	86.2183	89.6661	111.4	99.386	81.5293	108.731	106.013	107.806	111.017	97.0992	99.8384
957	P62823	98.1	89.2187	90.135	96.9	96.3684	106.608	104.696	102.001	107.701	99.146	105.468	92.4356
958	P62827	134.9	74.393	77.473	NA	NA	NA	92.3851	89.2636	126.725	NA	NA	NA
959	P62830	75.2	82.2471	81.2247	94.4	95.103	96.759	113.076	118.249	124.4	102.444	105.771	103.64
960	P62835	90.4	90.0129	97.6385	77.7	98.0232	94.2055	110.8	106.615	95.1232	127.945	103.956	98.9381
961	P62843	83.7	92.3074	97.4509	91.6	91.5987	90.7401	102.731	108.821	105.798	89.6931	121.903	112.343
962	P62849	79.1	96.808	91.9171	91.9	92.1827	89.7369	100.351	108.821	113.831	98.3766	119.282	107.241
963	P62852	72.2	78.9819	77.5668	88.4	82.9352	111.624	113.593	124.568	128.522	117.173	92.3602	105.841
964	P62855	86.3	91.8661	93.6054	102.2	91.3066	80.7997	105.42	109.022	104.847	95.7386	119.887	109.442
965	P62858	90.5	86.6595	78.5985	109.7	106.492	176.282	101.903	112.933	122.815	77.712	29.644	87.6337
966	P62862	NA	NA	NA	94.8	84.1033	95.9383	NA	NA	NA	125.966	84.798	115.044
967	P62874	96.9	88.8657	97.2633	121.5	92.6694	94.9351	104.386	106.013	97.3428	95.7386	105.166	87.8338
968	P62880	95.2	89.4835	99.4206	97.7	89.1651	111.442	107.903	105.11	93.3264	102.993	107.081	88.6341
969	P62881	104.7	89.9247	95.8564	98.4	80.9884	82.2589	98.489	103.907	97.6598	139.596	106.678	95.4367
970	P62889	86.1	87.4537	99.233	90.1	85.9528	93.3848	108.421	108.721	101.253	139.266	97.0992	96.3371
971	P62892	NA	NA	NA	95.9	102.793	84.5388	NA	NA	NA	112.006	106.88	97.8376
972	P62897	96.1	92.4839	96.6068	102.6	100.554	94.1143	99.8339	105.712	99.5623	93.2105	117.467	89.5344
973	P62900	88.9	100.161	88.6344	102.9	94.1295	81.1645	98.489	107.417	106.749	110.248	113.03	99.1381
974	P62908	84.9	92.8369	84.3199	107.6	89.3598	76.1487	100.868	112.031	117.107	106.511	118.273	102.84
975	P62911	89.9	87.542	98.4826	90.5	76.4133	124.3	107.49	111.429	95.9688	67.4896	96.5951	137.553
976	P62918	93.7	87.4537	94.9185	102.5	89.3598	82.1677	106.248	110.225	98.6111	111.017	113.03	102.439
977	P62962	98.4	96.3668	94.9185	98.2	105.129	81.6205	114.835	83.2458	102.733	119.041	108.09	88.8342
978	P62983	87.9	89.7482	103.641	98.1	96.8551	83.9004	106.145	104.308	98.5054	123.548	103.149	95.6368
979	P62984	73	73.7753	74.8468	NA	NA	NA	112.248	119.052	144.165	NA	NA	NA
980	P63001	95.9	91.3367	100.827	94.1	91.988	96.1207	109.041	100.497	92.5866	117.392	102.242	97.8376
981	P63005	103	89.0422	100.64	81.1	90.1385	79.7966	100.455	100.196	96.92	162.349	99.3175	92.6356
982	P63011	91.8	88.8657	93.4178	105.7	101.528	95.7559	107.696	102.503	107.489	100.355	103.552	91.1351
983	P63017	105.5	81.6294	90.8854	108.1	99.4833	90.1017	103.662	98.6914	112.457	103.433	104.359	93.3359
984	P63024	NA	NA	NA	91	83.6166	53.3497	NA	NA	NA	191.147	99.2166	92.3355
985	P63028	NA	NA	NA	104.8	89.1651	87.0011	NA	NA	NA	113.875	109.703	95.7368
986	P63032	NA	NA	NA	97.3	90.3332	81.7117	NA	NA	NA	134.21	102.342	96.7372
987	P63037	105.3	79.3349	88.2592	89.3	97.4392	89.0074	104.8	97.6884	118.481	103.872	106.577	112.843
988	P63038	131.9	93.4546	84.4137	102.9	98.9966	89.281	86.0744	85.7532	109.392	109.149	106.577	92.5356
989	P63040	105.8	96.102	102.61	96.1	90.9173	83.9004	88.5573	97.6884	98.1883	128.164	102.04	100.839
990	P63042	78.3	100.867	101.484	NA	NA	NA	114.421	103.806	90.05	NA	NA	NA
991	P63044	97.8	95.9256	96.7006	99.7	99.8727	80.3437	100.868	99.2932	99.1395	137.068	97.2	88.6341
992	P63054	94.3	84.8946	100.452	79.2	91.988	102.048	110.076	106.916	94.5947	126.406	108.291	92.0354
993	P63056	103.6	86.9243	93.6054	NA	NA	NA	105.731	98.892	102.839	NA	NA	NA
994	P63082	111.9	102.015	86.4771	87.7	104.156	101.228	81.8328	100.497	106.749	83.6476	114.24	104.84
995	P63085	123.5	77.3935	80.4744	98.4	94.9083	79.2494	95.6957	91.1692	126.302	124.647	111.014	93.636
996	P63087	105.3	93.6311	104.579	103.9	85.2714	79.979	87.109	92.2724	106.749	127.285	111.72	94.1362
997	P63089	65.7	71.6574	81.2247	92.8	80.599	96.4854	122.697	128.078	127.042	112.776	92.7635	124.048
998	P63094	96	90.0129	101.859	NA	NA	NA	107.8	106.815	87.5134	NA	NA	NA
999	P63101	103.5	87.0125	97.9199	101.7	88.7757	87.7306	100.765	103.506	98.1883	112.886	114.139	94.9365
1000	P63137	98.7	98.22	92.3861	83.9	91.2093	86.2715	106.145	103.706	90.2614	143.883	97.805	100.038
1001	P63141	92.4	86.0418	96.8881	112.2	87.8023	75.6015	120.318	101.5	94.3834	108.709	123.315	93.536
1002	P63143	96.4	95.9256	94.9185	92.5	88.6784	76.0575	103.455	104.208	94.9118	162.898	104.46	81.2312
1003	P63158	91.9	89.0422	91.6357	NA	NA	NA	106.558	104.709	107.912	NA	NA	NA
1004	P63163	92.1	88.8657	100.265	NA	NA	NA	105.214	101.199	103.367	NA	NA	NA
1005	P63168	103.8	86.3948	95.4812	78.6	93.3508	106.699	99.9373	97.0867	108.969	121.679	94.9818	103.54
1006	P63213	95.7	85.1593	96.8881	106.9	83.3246	88.825	114.214	107.116	92.1638	126.735	107.182	88.6341
1007	P63216	92.1	86.9243	96.9819	99.1	89.4571	81.0733	116.076	104.609	94.5947	136.188	101.334	95.7368
1008	P63239	95.9	93.5429	98.4826	95.7	100.554	94.4791	104.282	100.898	96.8143	118.711	99.015	91.3351
1009	P63242	94.7	88.8657	93.793	95	97.6338	81.2557	98.0752	106.514	109.497	117.392	114.139	95.6368
1010	P63250	99	93.4546	103.078	NA	NA	NA	106.662	102.904	84.0255	NA	NA	NA
1011	P63276	78.2	89.6599	83.382	90	83.0326	96.3942	106.352	113.836	121.546	115.744	110.005	104.54
1012	P63318	97.9	93.9841	97.9199	93.6	92.7668	94.9351	102.731	103.104	94.172	118.602	102.141	97.8376
1013	P63321	89.8	90.2777	95.3875	106	94.4216	85.7243	109.041	107.618	98.9281	116.733	108.795	88.8342
1014	P63323	98.7	96.1903	90.3226	81.2	78.0681	67.2115	97.8683	101.801	105.481	114.095	142.069	120.146
1015	P63325	80.1	91.7779	85.8206	88.2	81.3778	93.476	104.8	113.134	116.579	119.151	100.729	117.445
1016	P63328	104.3	84.0121	95.4812	94.6	96.8551	94.1143	106.352	98.4908	103.262	109.149	101.536	102.639
1017	P63330	101.6	86.9243	93.6054	106.6	99.094	78.8846	104.489	99.7946	105.27	132.671	96.4942	88.7341
1018	P67778	NA	NA	NA	100.4	99.5807	78.0638	NA	NA	NA	116.623	110.207	96.4371
1019	P67871	97.4	87.189	98.5764	87.8	84.2007	78.5198	101.179	102.302	104.636	122.009	126.037	103.64
1020	P67984	89.4	102.103	93.6054	107.2	93.1561	75.2368	97.5579	100.597	106.221	116.513	115.753	93.7361
1021	P68033	NA	NA	NA	138.1	101.625	67.6675	NA	NA	NA	94.8592	106.476	91.5352
1022	P68037	134.7	72.7163	74.9406	NA	NA	NA	85.1433	90.768	137.612	NA	NA	NA
1023	P68040	NA	NA	NA	75.9	76.4133	64.0196	NA	NA	NA	99.0361	147.312	139.254
1024	P68181	99.8	84.5416	93.793	104.7	99.8727	85.2683	105.317	98.9923	109.92	117.942	105.972	86.7334
1025	P68254	109.1	83.1296	93.8868	103.7	82.0592	89.0074	99.4201	100.597	106.01	125.416	115.854	85.4329
1026	P68368	140.1	71.5691	74.1902	98.8	100.749	91.1049	85.0399	79.0334	146.701	106.401	107.888	94.0362
1027	P68369	145.7	70.1571	71.2827	104.4	107.66	93.7496	80.2809	77.9301	151.669	105.192	95.7884	91.5352
1028	P68372	134.6	71.5691	76.6289	109.3	107.076	87.0922	88.4539	85.8535	138.986	101.015	105.67	88.6341
1029	P68404	93.8	90.5424	97.0757	100.2	95.395	95.8471	107.179	104.107	97.8712	111.567	91.4527	104.54
1030	P68510	108.8	84.8063	94.5433	110.1	87.5103	85.2683	97.8683	102.302	103.367	110.907	118.778	87.8338
1031	P69566	105.7	81.4529	85.7268	103.5	97.7312	69.4914	113.386	96.6855	110.554	135.089	112.425	85.5329
1032	P70122	76.5	74.9225	84.8826	NA	NA	NA	124.767	118.249	115.733	NA	NA	NA
1033	P70168	118.6	77.923	80.7557	99.2	104.545	90.1929	95.075	91.2695	131.164	100.465	99.9224	104.04
1034	P70175	107.7	86.2183	96.2316	114.9	77.0947	51.0698	99.9373	93.3757	108.018	192.137	101.737	74.2285
1035	P70181	NA	NA	NA	103.9	89.3598	73.1392	NA	NA	NA	146.741	100.326	91.1351
1036	P70188	101.8	78.0112	80.3806	NA	NA	NA	96.213	109.022	129.473	NA	NA	NA
1037	P70195	NA	NA	NA	94	89.6518	77.6991	NA	NA	NA	126.076	100.326	114.544
1038	P70202	103.7	83.6591	96.513	102.8	86.2449	81.8941	98.3855	96.5852	113.197	129.264	107.182	95.0366
1039	P70205	99.5	90.2777	96.8881	NA	NA	NA	99.4201	96.9864	107.912	NA	NA	NA
1040	P70206	103.3	84.1003	95.575	104.6	92.4747	75.6015	106.558	97.3875	104.953	115.524	119.988	93.4359
1041	P70211	96.2	99.5437	83.9447	89.4	92.6694	73.8688	97.8683	101.299	111.928	148.169	101.838	98.6379
1042	P70232	96.2	93.1899	104.485	101.2	78.5548	79.067	101.179	101.199	93.1151	147.4	111.316	86.9334
1043	P70236	142	69.4512	66.4992	NA	NA	NA	83.3846	82.9449	153.465	NA	NA	NA
1044	P70245	NA	NA	NA	113	98.8993	82.1677	NA	NA	NA	109.039	117.769	79.4306
1045	P70248	NA	NA	NA	94.7	87.997	96.1207	NA	NA	NA	122.009	79.454	119.846
1046	P70268	101.9	81.9824	88.6344	NA	NA	NA	113.904	104.308	102.099	NA	NA	NA
1047	P70280	96.5	94.6018	95.0123	105.2	93.4481	86.1803	104.593	103.104	96.3915	100.575	114.644	99.2382
1048	P70290	132.7	87.3655	90.9792	91.8	97.6338	85.2683	88.6608	82.3431	109.497	136.518	98.41	92.5356
1049	P70295	102.1	90.8954	92.9488	NA	NA	NA	104.076	103.004	97.6598	NA	NA	NA
1050	P70296	94.2	90.3659	105.892	93.5	84.006	85.9979	108.731	105.311	85.0824	145.092	113.333	81.5314
1051	P70302	100.1	88.1597	100.452	99.3	88.5811	84.9035	101.386	99.1929	101.359	100.135	121.5	105.04
1052	P70336	127.8	78.276	82.2564	88.6	91.696	85.1771	92.5921	88.7621	124.611	138.057	109.199	90.0346
1053	P70349	143.2	73.4223	76.7227	120.2	89.6518	85.7243	88.7642	84.8505	128.311	102.663	120.996	80.3309
1054	P70392	102.4	89.8364	93.793	88.4	94.4216	92.108	99.9373	97.5881	107.701	136.958	88.327	101.439
1055	P70398	108	85.0711	82.8192	101.3	95.7844	76.1487	99.4201	95.8831	122.18	122.778	103.552	102.539
1056	P70404	119.3	96.1903	97.5447	91.9	90.1385	92.8376	92.5921	88.1603	95.4403	120.14	106.376	98.9381
1057	P70414	98.4	93.6311	101.109	91.2	89.3598	93.932	102.938	103.706	89.6272	104.642	105.468	114.144
1058	P70429	109	89.9247	90.7916	97.2	87.705	86.2715	97.351	88.1603	116.367	143.443	98.3092	90.2347
1059	P70441	104.2	97.0728	106.455	94.9	96.2711	75.6015	97.7648	96.0837	86.6678	115.744	120.391	98.6379
1060	P70451	94.8	92.3074	96.9819	NA	NA	NA	108.938	104.408	92.798	NA	NA	NA
1061	P70452	90.1	102.015	105.611	100.6	88.9704	78.0638	125.18	90.9686	73.879	126.516	117.164	91.1351
1062	P70460	113.7	77.3935	101.859	NA	NA	NA	96.5233	88.4612	114.782	NA	NA	NA
1063	P70663	107.8	87.4537	86.2895	81.8	97.4392	101.592	100.041	104.91	105.375	96.0683	104.258	115.945
1064	P70670	80.4	102.015	81.6937	96.2	81.4751	80.2525	114.007	109.523	103.05	133.111	121.399	90.5348
1065	P70694	NA	NA	NA	111.7	138.907	56.1768	NA	NA	NA	93.5402	91.9569	107.541
1066	P70698	93	88.4245	76.8164	65.5	95.5897	107.976	101.386	110.727	123.026	132.121	87.0162	111.343
1067	P70699	96.8	96.9845	104.016	95.7	90.1385	83.6268	109.662	93.0748	88.3589	116.403	113.837	101.239
1068	P70704	96.4	95.3078	92.7612	107.5	96.7578	87.913	102.627	102.402	100.831	107.72	104.561	95.0366
1069	P80313	87	85.777	87.2275	106.5	97.5365	87.5482	115.145	109.122	108.44	91.3418	110.913	104.24
1070	P80314	129.7	78.9819	84.8826	93.2	96.7578	74.872	90.3161	85.8535	124.083	129.373	101.536	106.941
1071	P80315	85.8	83.8356	85.164	97.9	97.8285	80.2525	116.18	109.724	112.668	100.355	114.946	108.342
1072	P80316	112.5	83.6591	88.4468	95.8	96.9525	83.6268	95.4888	89.5644	123.554	108.489	103.451	111.643
1073	P80317	90.1	84.7181	85.3516	87.1	93.7402	86.6363	112.869	107.116	112.985	108.599	101.737	121.947
1074	P80318	91.9	82.2471	85.633	92.6	89.8465	80.0702	113.283	105.11	115.522	125.856	106.577	107.141
1075	P80560	97	97.867	100.077	92.8	96.0764	93.476	103.869	99.3935	90.6841	116.733	97.6034	103.04
1076	P81117	98	96.6315	94.6371	86.7	97.1471	89.3722	102.938	102.402	95.1232	129.593	101.939	96.4371
1077	P83093	97.6	91.4249	97.4509	82.9	87.413	88.2778	107.49	99.1929	97.3428	140.145	106.376	97.5375
1078	P83510	100.6	83.3061	94.0744	94.9	83.3246	77.4255	106.765	101.399	106.115	143.223	109.602	95.5367
1079	P83882	77.5	92.2191	93.2302	88.8	92.0854	85.4507	110.49	116.845	100.831	137.178	93.3685	105.541
1080	P84075	107.8	91.8661	96.4192	104.4	90.5279	83.3532	96.3164	100.697	97.0257	119.261	114.845	88.7341
1081	P84084	174	67.5097	61.9034	99.1	100.943	89.4633	74.4875	72.2132	147.335	105.631	103.855	100.038
1082	P84086	96.6	95.0431	110.488	86	88.289	97.3974	95.1784	91.3698	100.302	117.173	112.929	97.8376
1083	P84091	100	98.3965	102.703	100.2	95.979	90.9225	95.4888	98.1899	93.9606	106.291	105.569	100.239
1084	P84096	95.6	89.9247	94.4495	90.3	83.2273	73.96	108.421	99.6944	103.262	160.81	107.384	90.3347
1085	P84099	91.9	91.3367	96.2316	103	89.6518	81.9853	105.007	105.01	101.465	118.492	108.291	99.8384
1086	P84102	70.7	76.3345	88.8219	NA	NA	NA	116.49	119.653	122.92	NA	NA	NA
1087	P84104	84.8	80.3057	89.0095	96.5	95.8817	79.1582	100.558	97.6884	142.473	129.044	102.645	98.9381
1088	P84309	98.2	100.25	96.6068	98	82.8379	88.5514	105.317	99.1929	89.2044	127.725	104.762	99.6383
1089	P97300	89.8	91.9544	105.33	103.3	92.3774	75.4192	110.283	106.214	85.8223	124.207	114.24	92.9357
1090	P97315	91.3	84.5416	87.0399	91	94.9083	76.3311	102.524	117.046	110.132	125.966	112.929	101.239
1091	P97325	NA	NA	NA	89.9	91.404	75.4192	NA	NA	NA	145.641	113.635	88.334
1092	P97350	58.5	66.186	62.3723	NA	NA	NA	168.321	122.762	121.546	NA	NA	NA
1093	P97351	89.1	96.8963	91.7295	93	90.4306	98.2182	101.075	106.916	104.636	87.165	108.19	119.846
1094	P97352	93.7	95.1313	100.921	106.4	86.0502	79.067	105.627	101.5	92.5866	119.151	122.004	89.1343
1095	P97364	104.6	84.9828	83.1944	NA	NA	NA	97.8683	81.641	142.051	NA	NA	NA
1096	P97369	87.1	95.6608	96.9819	NA	NA	NA	102.938	105.01	102.31	NA	NA	NA
1097	P97370	92.8	84.9828	101.672	80.3	90.7226	96.5766	121.663	100.998	89.0987	133.221	106.174	94.2362
1098	P97371	NA	NA	NA	100.9	83.6166	65.0228	NA	NA	NA	143.993	113.131	98.738
1099	P97384	104	93.1016	97.4509	NA	NA	NA	103.351	95.4819	96.7086	NA	NA	NA
1100	P97390	96.1	91.0719	95.7626	60.4	66.6791	119.923	105.627	102.503	99.7737	119.921	76.4291	154.659
1101	P97393	102.3	95.8373	87.415	NA	NA	NA	96.1095	97.0867	112.245	NA	NA	NA
1102	P97411	104.2	92.5721	93.5116	99.6	92.0854	84.7212	101.696	92.6736	106.221	119.811	114.442	90.5348
1103	P97412	95.6	87.6302	87.884	71.6	82.8379	99.4949	109.455	99.1929	112.668	136.188	81.3697	129.55
1104	P97427	99.6	77.57	86.4771	105.4	89.5545	70.7682	114.835	103.506	112.034	131.682	115.349	90.7349
1105	P97429	97.9	96.102	105.236	96.7	89.4571	86.9099	109.041	101.299	78.7409	126.735	109.602	92.2355
1106	P97434	94.5	88.6892	108.706	100.9	83.9086	77.0607	100.248	97.889	99.8794	151.027	100.628	91.3351
1107	P97441	96.4	95.7491	94.3557	108.4	93.0588	83.6268	100.144	101.801	101.782	110.468	108.291	96.5371
1108	P97445	102.6	90.5424	94.6371	88.4	81.9618	81.9853	89.4884	93.7769	120.278	148.06	105.468	98.2378
1109	P97447	94.7	87.0125	93.0426	NA	NA	NA	101.386	112.933	102.522	NA	NA	NA
1110	P97450	96.1	103.074	97.8261	81.9	99.97	102.687	108.214	87.7591	95.9688	120.36	106.174	88.1339
1111	P97461	78.9	88.0715	86.4771	87.7	77.0947	87.3658	107.696	114.538	117.107	110.138	127.953	110.242
1112	P97467	102.2	94.9548	91.9171	99.2	96.5631	88.369	101.903	99.9952	99.2452	128.934	96.3934	91.7353
1113	P97471	NA	NA	NA	109.7	89.0678	73.3216	NA	NA	NA	164.437	93.9735	75.529
1114	P97490	105.8	80.7469	90.5102	100.5	89.1651	94.2055	106.972	97.5881	111.506	126.296	94.9818	95.6368
1115	P97492	126.9	81.7176	83.5695	NA	NA	NA	87.6262	84.8505	128.945	NA	NA	NA
1116	P97494	NA	NA	NA	108.9	114.474	61.1926	NA	NA	NA	130.363	94.8809	93.8361
1117	P97765	98.1	89.3952	92.0109	107.1	90.9173	86.5451	105.524	94.7798	112.034	113.765	106.476	95.5367
1118	P97772	104.4	84.8063	97.0757	106	87.2183	80.9821	100.558	102.503	102.099	113.106	114.845	98.9381
1119	P97789	96.1	70.8631	97.5447	NA	NA	NA	111.421	105.512	112.774	NA	NA	NA
1120	P97792	101.4	88.954	92.5737	96.9	94.9083	75.9663	104.179	96.5852	108.018	142.893	107.989	85.1327
1121	P97797	90.1	99.4555	107.018	99.2	94.4216	84.63	103.144	102.703	85.7166	121.13	107.384	94.3363
1122	P97798	103	89.307	89.3847	87.3	81.2804	87.6394	96.7303	109.925	103.05	137.178	97.0992	112.043
1123	P97799	106	99.3672	99.7019	116	121.872	96.8502	97.2475	99.9952	86.0337	85.4063	53.5407	121.747
1124	P97801	NA	NA	NA	91.6	83.5193	92.6552	NA	NA	NA	106.291	113.837	111.543
1125	P97807	98.5	85.5123	92.1985	92.6	96.7578	89.281	104.489	98.2902	113.514	116.293	101.536	103.64
1126	P97819	98.8	91.4249	89.8537	93.4	93.7402	78.7022	113.18	91.9716	106.432	126.955	112.627	96.8372
1127	P97820	85	83.9238	99.0454	94	95.103	88.369	128.905	94.9804	100.408	82.6583	126.743	110.442
1128	P97823	111.6	69.8924	66.8744	102.2	100.359	74.0512	120.525	98.2902	130.424	133.001	108.896	84.5325
1129	P97950	97.9	90.6307	92.1047	118.3	109.802	110.986	102.834	100.196	107.701	95.8485	54.549	105.941
1130	P97952	92.7	88.4245	99.7019	83.4	85.7581	92.2904	107.076	109.022	93.6435	133.331	102.342	104.54
1131	P98084	107	86.3065	88.7282	82.6	69.3074	101.501	94.9715	91.2695	124.506	134.54	105.468	108.042
1132	P98086	99.1	89.7482	107.112	90.5	90.1385	82.7148	95.7992	105.01	92.6923	121.24	114.543	102.339
1133	P98156	83.1	97.161	102.797	NA	NA	NA	115.869	88.7621	102.205	NA	NA	NA
1134	P98191	103.6	82.9531	89.5723	96	85.0768	85.4507	108.317	101.098	107.172	144.652	103.956	88.2339
1135	P98195	93.6	92.3956	98.2012	92.1	87.1209	80.0702	109.352	99.6944	97.1314	137.397	105.065	101.339
1136	P98200	94.8	97.867	99.0454	93.7	87.705	79.2494	102.006	99.7946	95.7574	134.979	115.148	92.3355
1137	P99024	134.1	72.0986	80.2868	98	90.1385	92.564	88.3504	80.939	140.043	121.13	98.0067	100.439
1138	P99026	94.4	129.725	81.1309	NA	NA	NA	99.9373	89.765	91.0012	NA	NA	NA
1139	P99027	91.8	89.6599	105.33	132.7	85.7581	88.369	100.558	103.606	99.1395	89.2534	115.551	86.4332
1140	P99028	NA	NA	NA	97.2	100.651	89.4633	NA	NA	NA	115.414	119.383	77.93
1141	P99029	113.8	88.8657	98.8578	104.2	94.0322	88.2778	98.5924	91.9716	98.3997	113.216	108.997	91.3351
1142	Q00493	101.6	95.2196	99.7957	93.5	94.3242	84.2652	99.1097	100.597	93.1151	121.679	109.501	97.9377
1143	Q00558	90	102.103	112.739	NA	NA	NA	102.627	90.8683	89.2044	NA	NA	NA
1144	Q00612	124.1	84.7181	86.1019	109.9	88.7757	82.1677	98.2821	92.3727	106.749	106.73	118.979	93.636
1145	Q00623	89.8	88.1597	103.547	94.5	98.5099	75.328	101.8	79.3342	129.473	133.111	106.476	94.9365
1146	Q01063	117.1	81.8941	88.353	NA	NA	NA	105.317	89.9656	110.449	NA	NA	NA
1147	Q01065	129.9	72.1868	69.782	89.9	91.3066	73.2304	91.3506	90.1662	143.425	131.132	114.845	102.74
1148	Q01097	98.9	87.4537	94.6371	93.2	82.0592	83.262	105.731	96.7858	108.335	136.188	109.199	98.9381
1149	Q01338	NA	NA	NA	104.1	64.927	92.108	NA	NA	NA	112.116	122.811	104.34
1150	Q01405	107	88.8657	88.8219	92.3	96.8551	77.7902	97.9717	98.7917	110.343	128.824	99.7208	106.741
1151	Q01730	107.9	89.0422	87.2275	NA	NA	NA	103.662	88.4612	115.945	NA	NA	NA
1152	Q01768	NA	NA	NA	99.1	104.545	105.058	NA	NA	NA	87.9344	104.762	94.4363
1153	Q01853	107.2	87.9832	93.1364	110.7	106.979	73.7776	101.179	98.9923	102.839	108.269	93.1668	107.641
1154	Q02053	115.8	87.2773	90.4164	84.3	96.9525	84.174	96.4199	94.479	107.384	132.451	100.83	103.34
1155	Q02105	97.7	92.3956	107.487	82.6	98.9966	67.1203	97.0406	102.904	91.424	158.502	110.308	88.5341
1156	Q02248	98.4	86.836	93.0426	96.3	93.1561	90.6489	106.765	107.818	98.6111	96.3981	115.652	106.141
1157	Q02257	77.9	77.6582	85.633	95.2	119.341	66.3907	102.834	121.76	128.945	116.073	118.273	86.6333
1158	Q02357	99.5	87.542	93.2302	109.3	85.0768	72.0449	107.283	96.0837	108.229	129.813	116.761	90.4348
1159	Q02819	90.8	94.3371	99.233	93.2	90.8199	81.5293	106.869	106.514	91.9524	129.373	105.67	101.639
1160	Q03137	97.1	91.3367	97.0757	86.7	84.6874	88.2778	105.627	103.305	96.0744	128.934	108.594	104.54
1161	Q03141	89.8	92.7486	94.0744	87.4	86.4395	86.0891	102.834	104.408	107.066	130.253	96.2926	115.444
1162	Q03157	101	91.0719	89.1971	94.6	89.9438	81.8029	109.455	101.7	98.9281	133.221	107.384	95.8369
1163	Q03173	110.4	81.4529	84.3199	NA	NA	NA	111.938	98.892	106.327	NA	NA	NA
1164	Q03265	105.4	91.7779	94.4495	102	105.616	100.042	98.489	95.181	105.481	99.3659	98.8133	91.4352
1165	Q03517	96	95.8373	102.797	95.5	92.5721	97.7622	101.179	102.101	91.0012	121.02	102.947	90.0346
1166	Q04447	100.3	91.6014	105.236	101.1	86.1475	98.0358	101.903	103.004	87.0906	108.489	113.131	92.1354
1167	Q04690	100.9	91.6014	94.5433	108.9	98.2179	89.1898	104.8	98.892	99.9851	102.773	110.005	89.9346
1168	Q04735	118.9	82.7766	81.0371	NA	NA	NA	109.455	84.8505	116.79	NA	NA	NA
1169	Q04736	NA	NA	NA	97.7	97.9259	76.6047	NA	NA	NA	149.928	106.174	76.1293
1170	Q04899	98.4	87.1008	94.4495	NA	NA	NA	116.18	87.5585	108.44	NA	NA	NA
1171	Q05144	97.4	89.3952	98.8578	NA	NA	NA	109.766	93.8772	101.676	NA	NA	NA
1172	Q05186	95.7	93.8958	98.295	66.4	97.4392	96.1207	101.386	106.916	93.4321	138.497	107.686	95.3367
1173	Q05512	91	91.2484	87.3213	91.5	89.4571	84.7212	103.041	106.214	113.091	130.802	101.032	104.64
1174	Q05816	104.8	87.4537	92.6675	NA	NA	NA	104.179	95.181	107.384	NA	NA	NA
1175	Q05860	100.3	85.6005	104.673	NA	NA	NA	105.834	92.9745	101.676	NA	NA	NA
1176	Q05920	100.1	96.5433	92.3861	92.6	98.9966	84.2652	108.317	92.473	100.514	131.792	94.9818	99.2382
1177	Q05BC3	108.5	94.6018	92.2923	NA	NA	NA	103.351	86.6559	105.27	NA	NA	NA
1178	Q06138	147.6	76.3345	74.0964	99.6	87.705	108.979	76.1427	80.3372	140.782	116.843	51.7257	133.251
1179	Q06180	102.6	96.8963	82.1626	69	78.9442	99.0389	101.489	111.028	96.2858	132.121	95.8892	125.948
1180	Q06185	94.5	100.073	105.33	105.6	113.209	92.7464	97.351	96.8861	94.172	94.4195	113.434	78.03
1181	Q06335	96.7	89.9247	102.985	91.8	91.0146	77.5167	101.489	100.096	99.0338	131.792	111.014	99.7384
1182	Q06890	101.9	97.6905	93.793	110.6	88.1917	74.1424	96.1095	99.2932	100.936	114.095	116.358	98.2378
1183	Q07076	102.8	87.8067	96.513	100.2	109.218	87.0011	100.248	100.497	103.262	102.004	110.207	90.1347
1184	Q07079	74.1	89.4835	92.3861	NA	NA	NA	114.007	110.727	111.294	NA	NA	NA
1185	Q07113	88.8	87.8067	97.6385	84.3	85.9528	87.0922	113.593	104.408	99.0338	138.607	104.056	102.639
1186	Q07235	89	90.8954	92.7612	NA	NA	NA	105.524	104.509	108.758	NA	NA	NA
1187	Q07417	NA	NA	NA	81.2	84.9794	93.7496	NA	NA	NA	121.24	103.855	115.444
1188	Q07813	124.5	81.0116	84.5075	NA	NA	NA	95.2819	90.5674	117.53	NA	NA	NA
1189	Q08331	96.9	89.0422	94.2619	102.7	81.4751	82.6236	103.041	99.2932	108.863	133.001	111.518	91.4352
1190	Q08509	83.6	144.109	77.8482	NA	NA	NA	86.0744	99.4938	92.6923	NA	NA	NA
1191	Q09200	90.4	85.0711	95.1999	80.7	87.3156	78.8846	112.869	106.815	101.57	150.698	110.61	96.3371
1192	Q09LZ8	105.1	80.3939	88.7282	NA	NA	NA	107.903	105.913	104.847	NA	NA	NA
1193	Q0GA42	NA	NA	NA	116.1	88.6784	87.5482	NA	NA	NA	130.912	91.5536	86.9334
1194	Q0KK55	NA	NA	NA	93.5	89.4571	83.4444	NA	NA	NA	152.346	109.4	75.9292
1195	Q0KL02	109.2	77.3935	80.8495	104.8	91.5987	84.63	123.318	91.0689	112.985	125.856	104.762	89.9346
1196	Q0P5W1	NA	NA	NA	99.9	88.3864	76.5135	NA	NA	NA	137.727	111.115	89.8346
1197	Q0PHV7	85.4	92.3074	85.633	NA	NA	NA	113.076	104.408	111.294	NA	NA	NA
1198	Q0V8T9	NA	NA	NA	92.5	82.3512	77.3343	NA	NA	NA	144.102	110.913	97.0373
1199	Q0VBF8	101.9	97.6023	101.578	93.7	81.7671	84.9947	100.351	95.9834	91.3183	133.44	107.182	101.439
1200	Q0VE82	94	84.5416	95.575	100	91.2093	88.2778	113.49	100.798	103.684	112.116	107.888	100.539
1201	Q11011	NA	NA	NA	110.1	80.4043	71.3153	NA	NA	NA	150.698	100.729	92.1354
1202	Q148V7	108.2	82.8649	72.502	NA	NA	NA	87.5228	87.5585	157.165	NA	NA	NA
1203	Q149F3	NA	NA	NA	83.6	60.7413	76.9695	NA	NA	NA	122.559	88.2262	170.666
1204	Q149L6	99.3	100.161	89.3847	115.4	106.103	94.0231	108.524	99.2932	92.9037	69.3582	110.61	99.5383
1205	Q14BB9	109	87.3655	69.1254	97.4	88.1917	81.6205	113.386	90.0659	125.563	145.202	97.2	94.2362
1206	Q14BI2	97.7	97.6905	98.1074	106.7	91.8907	78.2462	103.144	98.5911	94.0663	116.293	112.224	95.9369
1207	Q14CH0	101.7	93.8958	97.7323	NA	NA	NA	110.283	107.317	78.3181	NA	NA	NA
1208	Q14DK5	51.5	45.0947	51.1172	NA	NA	NA	51.3136	46.3368	366.859	NA	NA	NA
1209	Q1HKZ5	96.8	107.486	90.7916	79.4	79.9176	91.8344	93.7301	92.8742	107.278	138.387	90.6461	122.047
1210	Q1RLL3	NA	NA	NA	100.3	84.9794	82.3501	NA	NA	NA	133.99	102.342	98.738
1211	Q2KN98	101.1	92.9251	106.08	NA	NA	NA	93.2128	100.096	95.7574	NA	NA	NA
1212	Q2M3X8	106.4	83.9238	84.8826	100.5	90.8199	75.9663	107.696	96.6855	113.514	137.288	103.25	95.6368
1213	Q2NL51	100.2	84.9828	90.5102	97.8	100.067	80.6173	106.662	102.302	107.595	128.274	99.015	96.237
1214	Q2PFD7	88.1	94.9548	88.6344	96.5	98.6073	78.7934	96.3164	108.32	114.888	125.636	107.787	94.6364
1215	Q2TA57	95.8	93.7194	95.7626	NA	NA	NA	109.248	106.214	89.2044	NA	NA	NA
1216	Q2TBE6	102.9	91.4249	90.2288	95.3	89.6518	85.2683	101.489	101.098	103.896	121.24	117.164	92.6356
1217	Q2YDW2	110.1	101.926	76.9102	NA	NA	NA	98.5924	85.8535	117.847	NA	NA	NA
1218	Q31125	103.7	92.7486	95.9502	NA	NA	NA	95.5922	105.211	96.92	NA	NA	NA
1219	Q3B7Z2	111.1	87.542	86.1957	90.3	96.0764	85.5419	96.8337	96.2843	114.359	119.811	114.24	94.8365
1220	Q3LAC4	102.1	89.2187	101.39	NA	NA	NA	91.9713	95.9834	110.026	NA	NA	NA
1221	Q3TAS6	95	95.3078	89.1033	83.3	82.9352	168.166	105.11	109.222	96.6029	94.6394	11.8979	149.157
1222	Q3TC72	NA	NA	NA	119.2	84.8821	85.6331	NA	NA	NA	122.009	92.9652	96.5371
1223	Q3TDD9	100.5	74.393	74.753	NA	NA	NA	117.835	105.411	123.132	NA	NA	NA
1224	Q3TDK6	105	92.1309	91.6357	110.9	98.9966	76.8783	102.006	93.3757	106.855	107.39	121.198	85.2328
1225	Q3TDN2	91.8	90.2777	102.047	97.9	91.404	94.7527	110.076	102.904	93.2207	115.194	87.0162	113.244
1226	Q3TDQ1	97.1	95.4843	92.6675	96	88.1917	78.155	104.696	105.913	94.172	140.695	105.569	95.0366
1227	Q3TEL6	92.1	82.6884	112.458	NA	NA	NA	101.696	110.727	90.4727	NA	NA	NA
1228	Q3TES0	117.7	76.2463	81.3185	NA	NA	NA	100.455	86.8564	132.538	NA	NA	NA
1229	Q3TFD2	96.1	93.2781	103.36	76.7	78.5548	80.4349	107.903	100.497	88.2532	160.59	106.88	102.339
1230	Q3TFQ1	97.5	97.4258	86.2895	117	85.6608	74.5984	103.144	93.476	113.197	123.548	119.383	82.4317
1231	Q3TH73	100.8	92.2191	96.1378	NA	NA	NA	105.214	104.809	90.8955	NA	NA	NA
1232	Q3THE2	94.2	86.6595	101.39	104.5	96.4657	99.4949	93.0059	104.809	111.188	103.433	98.6116	95.4367
1233	Q3THK7	135.6	76.0698	76.3475	NA	NA	NA	98.6959	79.936	128.733	NA	NA	NA
1234	Q3TIR1	95.5	104.839	93.1364	79.8	83.9086	97.5798	105.317	93.0748	97.0257	125.636	108.997	104.74
1235	Q3TIR3	104.1	92.2191	89.5723	94.8	92.28	44.6861	100.662	102.202	102.205	172.901	126.743	78.5302
1236	Q3TIV5	89.7	96.8963	93.2302	NA	NA	NA	98.7993	104.007	107.806	NA	NA	NA
1237	Q3TJZ6	100.1	91.3367	100.921	90.2	69.0154	82.806	99.4201	99.2932	99.1395	143.003	93.3685	125.448
1238	Q3TLI0	97	94.2488	97.2633	95.1	86.9262	78.155	101.903	99.9952	99.7737	123.548	115.753	102.74
1239	Q3TLS3	115.2	85.1593	90.2288	NA	NA	NA	100.248	89.6647	111.928	NA	NA	NA
1240	Q3TMP8	NA	NA	NA	100	93.4481	96.3942	NA	NA	NA	99.2559	100.628	108.242
1241	Q3TPX4	100.6	82.8649	90.4164	NA	NA	NA	105.834	100.798	112.245	NA	NA	NA
1242	Q3TRR0	85.6	83.8356	88.2592	NA	NA	NA	106.455	111.63	117.424	NA	NA	NA
1243	Q3TTY0	NA	NA	NA	86	90.7226	67.0291	NA	NA	NA	168.394	85.4029	109.442
1244	Q3TTY5	NA	NA	NA	85.7	82.7405	73.4128	NA	NA	NA	118.931	143.178	98.6379
1245	Q3TVA9	96.4	96.7198	100.452	99.3	93.1561	86.0891	102.213	97.1869	96.3915	110.028	115.753	95.7368
1246	Q3TVP5	96.8	94.6901	95.0123	NA	NA	NA	102.006	96.7858	105.058	NA	NA	NA
1247	Q3TWI9	96.1	88.7775	104.298	82.9	89.3598	72.6833	114.318	95.2813	91.6354	161.36	103.754	95.8369
1248	Q3TWL2	96.8	91.2484	103.454	NA	NA	NA	105.11	100.898	92.2695	NA	NA	NA
1249	Q3TWN3	100.9	90.7189	91.7295	88	78.8469	75.328	100.455	78.7325	129.896	130.473	104.157	126.449
1250	Q3TXS7	98.4	94.2488	98.4826	93	92.0854	79.6142	98.2821	93.9775	106.749	120.91	105.972	109.942
1251	Q3TXX3	94.7	88.601	91.6357	NA	NA	NA	107.903	103.405	105.587	NA	NA	NA
1252	Q3TXX4	94.9	94.9548	96.4192	98.2	101.138	90.2841	102.834	102.503	98.5054	109.808	93.3685	106.441
1253	Q3TY60	86.1	100.603	102.328	85.8	86.5369	118.828	114.524	93.2754	92.1638	111.567	89.3353	104.84
1254	Q3TY86	101.8	85.5123	89.2909	NA	NA	NA	115.662	89.9656	110.449	NA	NA	NA
1255	Q3TZZ7	106.2	87.3655	90.7916	NA	NA	NA	112.455	96.8861	97.8712	NA	NA	NA
1256	Q3U0M1	97.3	96.102	94.4495	89.7	90.5279	81.3469	103.765	100.597	97.6598	130.692	104.863	105.24
1257	Q3U1F9	NA	NA	NA	91.8	79.6256	77.7902	NA	NA	NA	149.488	105.569	100.439
1258	Q3U1J4	116.6	82.3354	91.2606	121.6	102.793	59.1863	97.4544	107.618	96.4972	125.197	101.939	92.9357
1259	Q3U1Y4	95.3	84.4533	95.8564	88.1	83.3246	87.3658	111.524	97.7887	107.384	136.958	108.09	98.738
1260	Q3U213	NA	NA	NA	105.3	81.9618	78.8846	NA	NA	NA	172.901	84.8988	82.5317
1261	Q3U214	97.4	89.9247	95.0123	105.9	93.1561	79.7966	105.317	101.5	101.993	128.824	109.098	85.4329
1262	Q3U284	NA	NA	NA	82.2	73.3957	81.8941	NA	NA	NA	135.309	106.275	124.148
1263	Q3U3E2	90.7	92.2191	92.6675	NA	NA	NA	102.731	105.01	107.701	NA	NA	NA
1264	Q3U3R4	96.1	80.5704	89.5723	NA	NA	NA	115.042	98.0896	114.254	NA	NA	NA
1265	Q3U487	102.1	84.6298	91.3544	NA	NA	NA	103.869	101.6	108.758	NA	NA	NA
1266	Q3U4G3	88	87.9832	90.604	NA	NA	NA	119.18	102.503	103.79	NA	NA	NA
1267	Q3U5C7	89.9	88.3362	100.171	NA	NA	NA	123.008	92.8742	96.8143	NA	NA	NA
1268	Q3U5F4	145.4	66.186	81.6937	NA	NA	NA	86.902	90.0659	125.457	NA	NA	NA
1269	Q3U7R1	90.4	92.3956	101.859	NA	NA	NA	101.386	100.998	103.156	NA	NA	NA
1270	Q3UBX0	92.2	96.3668	101.296	96.3	79.1389	82.8972	109.455	102.703	87.0906	115.304	94.276	133.151
1271	Q3UDP0	117.7	71.4809	85.164	NA	NA	NA	97.4544	90.0659	133.701	NA	NA	NA
1272	Q3UDR8	NA	NA	NA	102	85.9528	76.6959	NA	NA	NA	117.832	121.097	98.2378
1273	Q3UDW8	101.3	105.809	86.5709	NA	NA	NA	108.524	101.6	84.871	NA	NA	NA
1274	Q3UE31	103.4	89.6599	96.9819	101.7	90.7226	83.9004	108.421	92.9745	99.5623	123.108	111.72	90.3347
1275	Q3UE37	120.2	83.1296	89.6661	81.4	93.6428	88.369	111.524	79.5348	108.652	139.926	108.09	91.035
1276	Q3UEZ8	98.5	97.0728	103.923	81.9	101.528	95.1175	102.834	96.0837	90.2614	115.634	103.351	101.839
1277	Q3UGP8	NA	NA	NA	105.4	82.7405	69.9474	NA	NA	NA	152.346	99.5191	95.6368
1278	Q3UGR5	102.6	80.7469	94.0744	NA	NA	NA	112.455	96.2843	106.538	NA	NA	NA
1279	Q3UGX3	111.5	81.9824	82.0689	NA	NA	NA	104.903	94.5793	118.798	NA	NA	NA
1280	Q3UGY8	113.2	79.5997	78.2233	88	94.5189	79.2494	105.11	93.0748	125.563	132.231	113.333	95.3367
1281	Q3UH60	99.9	91.9544	94.8247	90	90.3332	87.2746	103.351	98.4908	102.099	124.537	113.333	95.8369
1282	Q3UH66	101.3	89.0422	94.4495	92.1	86.3422	86.4539	108.214	93.476	105.058	133.001	97.2	107.041
1283	Q3UH68	95.7	91.4249	94.3557	NA	NA	NA	104.593	98.6914	106.221	NA	NA	NA
1284	Q3UH93	94.2	91.0719	102.516	88.6	71.7409	71.3153	104.696	99.0926	98.3997	185.432	97.5025	94.1362
1285	Q3UHB8	95.6	87.1008	90.2288	95.3	93.9349	84.0828	108.834	104.709	105.587	134.21	99.3175	95.3367
1286	Q3UHC7	113.9	72.0986	81.8813	NA	NA	NA	126.629	86.2547	114.993	NA	NA	NA
1287	Q3UHD1	89.8	86.6595	99.4206	NA	NA	NA	112.145	93.9775	109.814	NA	NA	NA
1288	Q3UHD2	87.8	93.3664	92.5737	97.3	87.3156	76.8783	104.179	92.7739	120.912	128.384	108.594	104.34
1289	Q3UHD3	95.5	86.5713	94.1681	NA	NA	NA	101.593	110.426	103.156	NA	NA	NA
1290	Q3UHD6	NA	NA	NA	90.4	88.9704	82.3501	NA	NA	NA	132.011	107.888	100.939
1291	Q3UHD9	96.4	99.1025	98.3888	96.9	81.7671	82.2589	96.213	98.7917	100.196	141.135	94.3768	106.941
1292	Q3UHE1	105.8	90.4542	97.2633	92.9	92.4747	76.2399	97.2475	92.9745	106.961	142.344	103.754	96.0369
1293	Q3UHF7	88.5	81.0999	94.5433	NA	NA	NA	121.352	99.6944	107.912	NA	NA	NA
1294	Q3UHG7	99.7	92.1309	96.3254	NA	NA	NA	102.731	100.396	99.2452	NA	NA	NA
1295	Q3UHH1	NA	NA	NA	47.7	53.3433	177.924	NA	NA	NA	56.1681	48.4992	203.278
1296	Q3UHH2	105.2	84.4533	95.1061	113.9	89.6518	77.8814	105.524	96.0837	105.692	119.591	104.258	96.4371
1297	Q3UHJ0	104.3	86.3065	105.892	101.4	90.7226	81.8029	102.317	95.0807	96.4972	129.373	102.947	95.9369
1298	Q3UHK1	97.1	94.3371	99.233	99.7	91.988	86.3627	103.765	101.399	93.9606	114.425	110.106	97.8376
1299	Q3UHK6	98.7	92.3074	88.9157	NA	NA	NA	112.766	105.512	92.5866	NA	NA	NA
1300	Q3UHL1	101.7	86.836	93.6054	113	90.0412	91.6521	103.662	104.809	100.831	108.379	110.913	85.4329
1301	Q3UHU5	106.2	93.8958	75.5971	92.2	81.6698	74.416	97.4544	99.4938	119.855	155.754	109.3	92.2355
1302	Q3UHX2	90.7	90.3659	90.8854	93.6	85.1741	73.4128	111.938	104.308	103.262	140.805	124.626	86.7334
1303	Q3UIA2	114.7	70.4219	96.7943	NA	NA	NA	84.5226	98.2902	129.579	NA	NA	NA
1304	Q3UIL6	NA	NA	NA	70.4	81.6698	90.5577	NA	NA	NA	124.977	92.461	141.054
1305	Q3UIU2	NA	NA	NA	94.6	88.0943	95.6647	NA	NA	NA	106.511	105.266	108.742
1306	Q3UJD6	115.2	88.1597	79.3489	NA	NA	NA	101.179	98.3905	110.343	NA	NA	NA
1307	Q3UJP5	NA	NA	NA	79	83.714	66.3907	NA	NA	NA	194.995	96.6959	89.0342
1308	Q3UJU9	101	91.5132	83.5695	84.9	99.386	80.9821	107.8	102.804	105.164	128.054	108.997	99.7384
1309	Q3ULD5	NA	NA	NA	91.7	85.0768	74.6896	NA	NA	NA	176.748	95.3851	83.6322
1310	Q3ULJ0	119.2	82.1589	84.2261	108.1	92.5721	69.5826	98.489	91.3698	117.953	128.494	114.341	90.3347
1311	Q3UM45	NA	NA	NA	96.9	83.5193	71.6801	NA	NA	NA	139.046	128.961	84.2324
1312	Q3UMB9	104.9	83.3061	89.8537	104.3	89.4571	77.2431	109.559	95.4819	109.709	114.535	119.383	96.5371
1313	Q3UMR0	114	81.5411	89.1971	NA	NA	NA	103.455	105.01	99.1395	NA	NA	NA
1314	Q3UMR5	NA	NA	NA	106	96.5631	81.9853	NA	NA	NA	117.722	115.349	83.4321
1315	Q3UN02	98.4	94.0723	95.8564	99.7	91.5013	88.7338	105.007	102.703	94.0663	115.414	98.41	106.441
1316	Q3UNH4	91.2	87.3655	101.296	109.9	89.7492	82.9884	110.697	111.329	88.676	121.789	107.384	89.6345
1317	Q3UPH1	119	81.5411	77.473	NA	NA	NA	103.662	91.771	120.806	NA	NA	NA
1318	Q3UPL0	122.3	75.805	77.473	103.5	98.1206	85.7243	94.9715	90.8683	134.018	117.722	88.0245	107.241
1319	Q3UR70	92.4	78.4525	95.9502	95.6	85.1741	102.504	103.351	107.317	115.733	102.553	92.2594	119.746
1320	Q3URD3	94.5	88.7775	101.203	95.5	87.3156	74.5984	109.145	101.7	95.2289	139.486	112.526	94.5364
1321	Q3USB7	124.4	73.9518	82.444	NA	NA	NA	91.8679	92.5733	129.79	NA	NA	NA
1322	Q3UTH8	119.8	81.3646	82.444	NA	NA	NA	99.7304	86.5556	124.083	NA	NA	NA
1323	Q3UTJ2	89.6	86.483	98.295	102	87.2183	87.0922	108.834	102.703	105.692	123.878	97.4017	103.54
1324	Q3UTQ8	96.2	92.2191	95.1061	NA	NA	NA	103.455	101.299	102.31	NA	NA	NA
1325	Q3UTZ3	92	91.0719	98.295	90.9	84.9794	97.8534	106.765	102.402	100.196	113.325	87.117	124.948
1326	Q3UU96	96.3	90.1894	97.3571	100.4	91.988	83.1708	102.524	100.196	104.213	124.097	110.409	91.5352
1327	Q3UUG6	119.3	77.57	85.9144	87.5	94.0322	90.7401	98.9028	92.1721	120.172	126.076	111.417	91.2351
1328	Q3UUJ4	102.8	98.7495	88.8219	NA	NA	NA	105.42	93.1751	101.253	NA	NA	NA
1329	Q3UUQ7	96.5	94.7783	98.3888	111.1	93.1561	73.5952	99.5235	101.399	99.3509	113.106	119.181	91.4352
1330	Q3UV17	NA	NA	NA	65.2	148.057	56.9063	NA	NA	NA	94.8592	139.549	95.7368
1331	Q3UVC0	93.3	89.7482	87.1337	100.3	85.1741	85.6331	104.903	108.721	108.123	122.229	111.518	96.5371
1332	Q3UVG3	105.1	87.4537	83.5695	99.1	98.8019	77.3343	100.972	99.8949	115.733	109.588	115.954	100.038
1333	Q3UVK0	94.5	93.6311	95.1061	NA	NA	NA	108.731	104.408	93.8549	NA	NA	NA
1334	Q3UVL4	110.6	81.1881	78.2233	87.9	96.3684	79.979	101.386	90.6677	132.75	142.454	106.174	90.5348
1335	Q3UVU3	99	92.8369	99.4206	NA	NA	NA	98.7993	101.299	98.6111	NA	NA	NA
1336	Q3UVX5	91.3	89.7482	95.9502	107.2	87.5103	82.0765	108.11	105.612	100.196	115.304	113.03	96.0369
1337	Q3UYC0	102.2	95.7491	97.5447	97.4	96.4657	93.3848	105.834	88.5615	100.091	104.092	104.056	103.24
1338	Q3UYH7	96.2	91.6896	105.142	91.9	98.9966	77.9726	102.213	93.9775	100.725	126.186	116.257	90.7349
1339	Q3UZB0	NA	NA	NA	92.7	89.9438	80.8909	NA	NA	NA	130.363	114.039	94.6364
1340	Q3UZP4	101	92.5721	92.1047	104.5	103.572	100.498	106.041	101.399	97.6598	70.1277	116.358	99.8384
1341	Q3UZV7	94.8	112.075	96.6068	87.4	84.8821	82.4412	97.2475	95.6825	90.6841	140.585	110.207	97.7376
1342	Q3V038	94.2	92.3956	96.2316	NA	NA	NA	104.076	98.2902	105.481	NA	NA	NA
1343	Q3V0G7	NA	NA	NA	101.1	91.7933	90.8313	NA	NA	NA	103.323	105.972	105.841
1344	Q3V132	95	102.103	105.048	NA	NA	NA	95.6957	95.0807	95.0175	NA	NA	NA
1345	Q3V1U8	94.7	93.4546	102.61	NA	NA	NA	107.903	100.697	90.2614	NA	NA	NA
1346	Q3V3V9	99.4	94.6901	93.9806	96.1	78.4575	97.3062	110.49	87.6588	104.636	129.483	104.157	95.6368
1347	Q3V4B5	NA	NA	NA	90.6	81.9618	73.96	NA	NA	NA	152.236	107.787	98.6379
1348	Q3ZK22	103	90.3659	97.9199	NA	NA	NA	101.903	99.2932	98.0826	NA	NA	NA
1349	Q3ZT31	92.3	84.3651	93.5116	NA	NA	NA	109.662	109.323	102.944	NA	NA	NA
1350	Q45VK7	96.4	92.1309	83.4757	NA	NA	NA	103.248	105.211	111.506	NA	NA	NA
1351	Q497I4	157.6	61.4206	52.1489	NA	NA	NA	206.91	54.5611	66.4806	NA	NA	NA
1352	Q4ACU6	96.5	85.777	97.1695	100.8	94.9083	81.5293	109.869	96.3846	106.115	112.666	113.333	97.3374
1353	Q4JIM5	109.9	84.9828	92.7612	97.2	80.599	84.9947	103.248	91.1692	110.132	136.958	99.9224	103.14
1354	Q4KMM3	135.9	72.0986	71.3765	92.9	97.3418	80.3437	84.626	84.9508	147.758	126.845	111.115	93.4359
1355	Q4KUS2	105.8	86.0418	98.2012	83.4	90.3332	93.6584	101.075	94.2784	105.904	125.197	100.83	107.141
1356	Q4PJX1	96.3	87.1008	92.9488	NA	NA	NA	105.524	105.211	104.741	NA	NA	NA
1357	Q4QQM4	94.4	91.6896	98.295	NA	NA	NA	106.041	104.408	95.546	NA	NA	NA
1358	Q4U2R1	94	94.5136	94.9185	99.8	95.0056	73.2304	106.869	98.3905	101.782	136.078	106.476	92.8357
1359	Q4V9Z5	95.4	93.5429	99.3268	63.8	62.9802	100.498	106.248	100.898	94.3834	144.652	101.838	128.75
1360	Q4VAE3	NA	NA	NA	96.8	99.97	70.0386	NA	NA	NA	149.159	105.972	82.8319
1361	Q4VBD2	99.2	100.426	94.9185	NA	NA	NA	99.2132	102.001	93.2207	NA	NA	NA
1362	Q4VC33	NA	NA	NA	94.7	92.8641	79.7054	NA	NA	NA	121.349	106.476	106.541
1363	Q501J6	NA	NA	NA	85	83.2273	61.6485	NA	NA	NA	164.657	104.157	108.842
1364	Q504M8	97	90.6307	91.7295	96.3	86.8289	89.281	106.145	103.305	102.416	137.178	93.9735	98.5379
1365	Q505F5	100.3	85.6888	88.9157	100.5	90.8199	74.0512	113.386	96.6855	107.701	104.312	115.652	115.444
1366	Q50H33	NA	NA	NA	88.7	88.5811	102.413	NA	NA	NA	130.912	88.7303	100.839
1367	Q52KF3	95.4	90.0129	93.6992	90.2	89.8465	88.7338	99.0063	102.703	110.449	133.55	98.3092	101.139
1368	Q52KR3	112.7	94.1606	101.109	84.5	102.112	91.7432	91.9713	85.1514	104.636	119.701	101.032	100.939
1369	Q56A07	98.2	93.1016	93.2302	102.7	86.0502	89.281	100.972	109.022	95.7574	121.02	108.997	92.9357
1370	Q570Y9	104	86.483	83.7571	118.7	99.386	60.919	108.007	101.901	108.652	115.963	109.501	98.3378
1371	Q571E4	NA	NA	NA	115.7	74.6612	72.1361	NA	NA	NA	135.199	108.392	97.9377
1372	Q571I9	NA	NA	NA	98.4	88.9704	46.8748	NA	NA	NA	92.7708	117.669	157.761
1373	Q587J6	93.1	90.9837	103.36	NA	NA	NA	120.008	89.1633	93.7492	NA	NA	NA
1374	Q58A65	106.4	98.8377	82.8192	NA	NA	NA	98.5924	100.898	103.156	NA	NA	NA
1375	Q59J78	NA	NA	NA	93.5	91.404	74.416	NA	NA	NA	146.191	112.123	86.6333
1376	Q5BLK4	97.8	89.3952	87.6026	NA	NA	NA	106.869	101.901	108.546	NA	NA	NA
1377	Q5DQR4	96.3	96.5433	100.64	88.8	88.6784	93.2936	100.868	99.4938	95.3346	120.47	108.291	100.839
1378	Q5DTJ9	167.5	69.9806	66.6868	92.5	88.6784	78.8846	71.9011	79.4345	140.994	138.387	103.653	101.139
1379	Q5DTL9	108.8	84.3651	94.4495	107.8	91.696	90.8313	102.834	92.6736	108.863	101.454	108.291	98.6379
1380	Q5DTN8	99.4	86.9243	92.5737	NA	NA	NA	103.351	103.506	106.01	NA	NA	NA
1381	Q5DTT2	90.8	90.5424	96.3254	92.9	102.404	73.4128	103.972	96.3846	113.514	144.212	100.527	90.5348
1382	Q5DTY9	99.3	85.424	93.6054	115.2	86.8289	76.1487	104.489	100.497	108.652	136.738	101.334	87.2336
1383	Q5DU25	99.7	96.808	97.8261	87.4	92.5721	72.5009	102.731	97.6884	94.7004	150.148	109.501	92.8357
1384	Q5DU31	110.9	80.9234	83.5695	111.8	79.5283	82.5324	98.5924	101.299	118.376	119.481	119.383	88.8342
1385	Q5EBJ4	87.2	89.6599	87.9778	89.6	91.696	80.8909	103.662	113.335	110.026	148.06	104.964	88.7341
1386	Q5EG47	104.8	83.3061	92.2923	NA	NA	NA	104.8	94.8801	112.562	NA	NA	NA
1387	Q5F2E7	78.9	79.5114	81.1309	NA	NA	NA	112.248	117.246	125.774	NA	NA	NA
1388	Q5F2E8	98.2	91.9544	96.8881	96.1	82.8379	98.6741	105.317	103.606	94.3834	105.851	119.786	95.6368
1389	Q5FWH7	92	87.0125	97.9199	NA	NA	NA	106.455	108.821	98.8224	NA	NA	NA
1390	Q5FWK3	124.9	76.6875	75.8785	93.8	85.1741	82.9884	89.5919	91.6707	136.555	133.55	102.443	104.54
1391	Q5GH67	NA	NA	NA	88.2	88.3864	91.9256	NA	NA	NA	119.921	96.1917	115.745
1392	Q5GIG6	97.6	90.0129	88.7282	NA	NA	NA	114.731	90.1662	110.977	NA	NA	NA
1393	Q5H8C4	102.2	76.158	75.9723	NA	NA	NA	116.8	102.603	121.969	NA	NA	NA
1394	Q5HZI1	NA	NA	NA	93.9	88.5811	81.4381	NA	NA	NA	131.242	108.997	98.2378
1395	Q5HZI2	97.6	86.483	91.4481	92.4	86.4395	80.0702	115.559	96.7858	104.318	145.421	103.351	96.3371
1396	Q5HZJ5	NA	NA	NA	67.4	80.4043	95.9383	NA	NA	NA	178.946	73.1017	109.542
1397	Q5KU39	85	121.253	108.425	90.2	91.1119	90.7401	83.3846	81.7413	105.587	126.516	108.291	94.2362
1398	Q5M8N0	118.3	79.8644	85.7268	100	95.5897	101.775	98.3855	97.9893	113.197	87.4947	113.131	98.4379
1399	Q5MJS3	NA	NA	NA	94.6	96.0764	95.1175	NA	NA	NA	121.679	52.5324	139.654
1400	Q5NCF2	106.5	95.7491	90.3226	111.6	93.8375	63.6549	101.903	93.5763	102.31	121.789	120.794	91.6352
1401	Q5NCX5	96.3	100.779	88.6344	NA	NA	NA	103.972	94.479	106.01	NA	NA	NA
1402	Q5PR68	101.9	97.3375	85.4454	NA	NA	NA	119.697	104.91	80.749	NA	NA	NA
1403	Q5PR69	96.3	101.044	89.1971	NA	NA	NA	110.49	96.8861	95.8631	NA	NA	NA
1404	Q5PR73	101.4	91.7779	89.7599	107	93.7402	77.7902	105.627	101.199	101.253	123.658	110.913	88.9342
1405	Q5QNQ6	121.9	74.6578	79.724	111.6	96.6604	95.0263	100.455	92.7739	125.774	92.3311	102.443	99.3382
1406	Q5RJI5	96.1	92.3956	95.575	89	95.395	79.6142	102.938	98.1899	105.587	144.872	97.5025	97.2374
1407	Q5RKR3	98	90.1012	86.7585	NA	NA	NA	107.903	100.096	109.18	NA	NA	NA
1408	Q5SNZ0	104.5	93.9841	95.3875	116.7	83.5193	77.0607	111.214	86.355	99.0338	104.642	119.786	98.838
1409	Q5SP85	100.2	94.7783	94.7309	101.1	93.1561	71.6801	99.7304	97.2872	103.684	123.108	117.568	96.0369
1410	Q5SQX6	101.1	99.0142	89.7599	107.6	99.094	81.4381	98.6959	98.1899	103.367	120.47	103.048	89.6345
1411	Q5SRX1	116.2	77.217	84.0385	90.8	87.2183	85.1771	92.9024	87.7591	136.872	135.639	103.754	99.9384
1412	Q5SS80	NA	NA	NA	93.1	86.9262	95.7559	NA	NA	NA	123.438	94.5785	106.641
1413	Q5SSH7	98	77.8347	96.8881	88.8	85.8555	74.0512	118.249	96.5852	105.587	150.807	104.964	100.539
1414	Q5SSH8	102.2	101.397	94.3557	NA	NA	NA	104.593	91.9716	94.7004	NA	NA	NA
1415	Q5SSL4	127.6	75.9815	80.5682	90.8	96.4657	80.4349	93.6266	91.2695	125.668	128.824	112.728	92.8357
1416	Q5SSM3	112.5	78.8054	84.7888	109.6	98.8019	82.4412	106.145	89.063	123.026	105.851	108.09	95.0366
1417	Q5SSZ5	108.8	80.6587	87.1337	95.2	87.8997	81.3469	113.076	92.2724	111.506	147.18	106.275	86.0331
1418	Q5SVL6	124.6	75.3638	84.3199	NA	NA	NA	92.6955	95.3816	121.969	NA	NA	NA
1419	Q5SWP3	96.9	89.6599	90.4164	86.8	85.9528	81.3469	105.11	106.113	103.156	138.497	113.131	97.5375
1420	Q5SWU9	109.8	86.3065	87.5088	92.6	90.9173	69.4002	102.11	98.1899	108.335	103.433	107.888	136.853
1421	Q5SXY1	91	97.2493	103.547	NA	NA	NA	99.3166	100.697	97.1314	NA	NA	NA
1422	Q5U3K5	91.7	102.632	103.078	98.9	89.8465	83.9916	116.076	79.4345	95.9688	123.768	106.376	98.6379
1423	Q5U458	NA	NA	NA	130.9	98.5099	74.6896	NA	NA	NA	115.084	116.055	66.1254
1424	Q5U4C1	90.6	91.8661	90.3226	34.1	110.386	99.0389	107.8	103.907	106.961	129.154	117.064	110.342
1425	Q5U4F6	NA	NA	NA	105	78.4575	50.0666	NA	NA	NA	155.314	139.044	80.3309
1426	Q5XG73	86.1	160.964	78.3171	NA	NA	NA	91.0402	86.0541	78.5295	NA	NA	NA
1427	Q5XJV6	97.6	93.5429	89.2909	NA	NA	NA	106.352	106.013	97.9769	NA	NA	NA
1428	Q5XJY5	111.2	79.9527	86.5709	107.2	86.6342	67.6675	96.3164	92.6736	127.254	120.8	101.032	119.546
1429	Q5XKN4	98.3	89.7482	95.2937	NA	NA	NA	106.145	100.196	101.253	NA	NA	NA
1430	Q5Y5T1	96.8	92.3956	98.295	NA	NA	NA	109.248	110.727	82.0173	NA	NA	NA
1431	Q60597	NA	NA	NA	76.1	93.4481	110.712	NA	NA	NA	108.159	97.4017	111.543
1432	Q60598	111.6	90.1894	94.1681	99.2	83.6166	81.6205	95.9026	92.2724	106.855	131.022	112.929	94.2362
1433	Q60605	85.6	85.6005	108.894	89.8	90.8199	127.675	99.8339	103.305	107.595	85.9559	108.493	91.1351
1434	Q60610	96	91.6896	96.6068	103.5	82.3512	74.0512	104.903	94.0778	107.595	139.266	105.367	99.6383
1435	Q60625	89.6	84.0121	94.4495	101.6	85.2714	80.2525	112.662	111.429	99.7737	141.355	103.956	91.035
1436	Q60629	NA	NA	NA	79.3	77.5814	81.0733	NA	NA	NA	154.874	120.693	91.5352
1437	Q60631	83.3	82.8649	101.39	95.7	93.8375	72.1361	112.662	99.2932	112.88	133.88	117.87	90.0346
1438	Q60634	96.8	89.8364	96.2316	114.1	93.5455	76.2399	107.696	104.609	95.546	121.02	102.746	94.2362
1439	Q60673	97.2	91.8661	98.764	98.4	89.2624	89.281	105.731	103.305	93.2207	116.733	100.427	106.241
1440	Q60676	107.4	92.3074	90.135	NA	NA	NA	92.2817	103.606	105.058	NA	NA	NA
1441	Q60692	100.2	91.5132	98.9516	122.9	105.713	62.4693	96.4199	97.4878	106.01	87.2749	98.1075	123.247
1442	Q60710	NA	NA	NA	94.4	83.5193	68.3059	NA	NA	NA	153.336	105.972	100.339
1443	Q60714	100.1	92.0426	98.764	89.9	84.4927	80.0702	101.696	103.305	94.0663	133.55	119.584	95.4367
1444	Q60720	NA	NA	NA	95.3	97.3418	82.8972	NA	NA	NA	115.524	103.351	106.241
1445	Q60737	98.7	87.189	95.8564	90.3	86.9262	83.8092	102.524	101.7	105.587	107.17	120.693	111.343
1446	Q60738	NA	NA	NA	97.9	88.9704	71.0417	NA	NA	NA	167.515	100.527	80.631
1447	Q60749	92.6	83.9238	92.3861	NA	NA	NA	115.456	108.621	99.3509	NA	NA	NA
1448	Q60751	97.8	90.1012	93.9806	NA	NA	NA	102.213	104.609	102.31	NA	NA	NA
1449	Q60760	92.1	86.13	82.444	95.7	95.0056	94.9351	116.594	96.8861	119.644	112.006	102.947	98.6379
1450	Q60770	101.3	93.5429	97.2633	NA	NA	NA	96.1095	99.4938	102.416	NA	NA	NA
1451	Q60771	87	82.9531	98.4826	104.5	101.722	118.646	114.214	115.441	93.5378	81.6691	95.3851	92.0354
1452	Q60780	92.9	83.3061	98.764	94.8	89.9438	88.2778	105.834	106.615	104.424	133.99	110.308	84.6326
1453	Q60790	94.8	91.3367	95.4812	NA	NA	NA	100.351	105.812	102.839	NA	NA	NA
1454	Q60803	96.1	93.6311	96.4192	93.4	91.5013	82.4412	103.041	98.2902	102.839	123.768	116.257	94.4363
1455	Q60823	136.8	79.4232	76.2537	NA	NA	NA	91.0402	81.641	129.473	NA	NA	NA
1456	Q60829	89.9	88.8657	110.019	97	79.8203	95.5735	102.317	107.116	91.3183	95.6286	120.189	110.142
1457	Q60838	100.3	89.3952	85.0702	NA	NA	NA	121.042	82.644	114.465	NA	NA	NA
1458	Q60841	106.2	97.0728	87.6964	NA	NA	NA	105.42	85.7532	108.969	NA	NA	NA
1459	Q60854	103.8	86.3065	93.5116	NA	NA	NA	109.972	103.405	94.3834	NA	NA	NA
1460	Q60864	100.1	87.8067	101.859	84.5	92.4747	85.7243	105.42	104.007	91.2126	121.679	101.838	114.744
1461	Q60865	95.5	82.6001	88.4468	NA	NA	NA	112.973	108.22	105.164	NA	NA	NA
1462	Q60870	96.7	95.6608	92.1047	118.2	79.5283	73.8688	102.834	103.506	99.2452	90.1327	129.365	108.742
1463	Q60872	NA	NA	NA	58.3	73.7851	105.879	NA	NA	NA	114.974	90.3436	155.66
1464	Q60875	98.1	90.9837	93.2302	86.3	87.705	82.1677	103.144	98.2902	107.489	129.483	114.039	102.74
1465	Q60902	104.7	104.662	102.891	100.7	94.7136	82.5324	96.1095	93.7769	85.2938	121.459	106.678	95.3367
1466	Q60930	97.6	95.2196	102.703	95	91.0146	97.0326	101.593	106.715	84.9767	118.052	107.888	90.7349
1467	Q60931	95.3	87.895	98.764	88.5	92.4747	137.341	108.11	109.423	91.1069	92.8807	71.6901	110.342
1468	Q60932	93.1	92.0426	103.36	99.8	90.6252	107.338	105.834	106.815	88.4646	97.4973	101.233	100.439
1469	Q60960	113.9	96.9845	85.4454	NA	NA	NA	92.799	95.7828	105.587	NA	NA	NA
1470	Q60996	119.7	78.7172	81.5061	NA	NA	NA	98.1786	87.5585	128.839	NA	NA	NA
1471	Q61016	98	87.0125	97.4509	100.7	91.2093	91.5609	113.697	104.809	89.9443	110.468	109.4	96.237
1472	Q61024	112.4	84.1886	85.7268	NA	NA	NA	101.593	95.181	113.831	NA	NA	NA
1473	Q61036	158.2	59.0379	63.1227	NA	NA	NA	85.1433	78.4316	155.579	NA	NA	NA
1474	Q61037	104.2	87.0125	87.9778	98.2	86.8289	83.3532	104.593	93.6766	115.205	137.727	96.6959	99.9384
1475	Q61070	NA	NA	NA	72.3	74.7585	98.127	NA	NA	NA	131.792	94.4776	129.75
1476	Q61072	96.9	93.3664	88.1654	95.7	84.59	84.4476	112.973	100.196	99.5623	135.969	111.115	90.935
1477	Q61081	126.4	82.5119	79.6302	NA	NA	NA	88.5573	89.765	126.937	NA	NA	NA
1478	Q61097	97.8	96.6315	96.1378	99.3	94.0322	87.3658	104.282	89.5644	105.798	120.25	106.174	93.7361
1479	Q61102	NA	NA	NA	121.7	88.0943	89.0986	NA	NA	NA	104.422	116.862	79.2305
1480	Q61112	NA	NA	NA	96.7	100.067	76.0575	NA	NA	NA	123.328	115.652	90.1347
1481	Q61120	104.8	91.4249	94.6371	93.7	98.8019	81.8029	103.972	93.9775	101.993	115.744	115.349	95.4367
1482	Q61137	96.7	87.9832	96.7943	92.8	79.0416	75.1456	103.558	103.004	103.262	159.271	106.88	92.8357
1483	Q61140	117.6	86.9243	84.5075	NA	NA	NA	91.9713	87.9597	123.977	NA	NA	NA
1484	Q61144	94.3	96.808	86.1019	NA	NA	NA	117.732	97.1869	98.8224	NA	NA	NA
1485	Q61147	101.3	68.1274	85.2578	NA	NA	NA	128.181	81.5408	132.644	NA	NA	NA
1486	Q61151	114.3	79.5997	88.0716	80.1	83.1299	92.8376	94.7646	94.0778	122.709	146.081	94.276	106.341
1487	Q61165	87.6	95.0431	103.078	97.1	92.0854	75.8751	103.144	98.892	101.993	123.987	116.358	97.0373
1488	Q61166	95.6	94.9548	95.8564	NA	NA	NA	106.145	94.6795	103.262	NA	NA	NA
1489	Q61171	138.8	73.1576	77.5668	114.9	98.3152	76.5135	85.6606	88.3609	131.798	109.698	112.829	88.434
1490	Q61176	NA	NA	NA	143.2	122.651	59.8246	NA	NA	NA	92.1113	79.9581	102.239
1491	Q61187	133.6	89.1305	78.7861	NA	NA	NA	83.0742	88.2606	119.432	NA	NA	NA
1492	Q61194	108.3	88.0715	85.0702	NA	NA	NA	112.766	104.609	92.9037	NA	NA	NA
1493	Q61206	96.4	86.0418	92.4799	NA	NA	NA	107.49	104.107	105.587	NA	NA	NA
1494	Q61207	94	97.3375	104.861	63.5	98.9966	91.1961	97.6613	94.9804	100.196	158.722	92.8643	98.3378
1495	Q61210	100.7	85.5123	96.7943	NA	NA	NA	108.834	86.7562	113.619	NA	NA	NA
1496	Q61220	91.2	95.0431	99.8895	NA	NA	NA	102.317	109.222	91.7411	NA	NA	NA
1497	Q61233	106.1	76.158	88.8219	NA	NA	NA	108.007	100.998	113.936	NA	NA	NA
1498	Q61234	112.3	81.9824	87.2275	NA	NA	NA	101.903	94.6795	115.099	NA	NA	NA
1499	Q61282	95.9	84.7181	94.1681	NA	NA	NA	98.489	106.916	111.928	NA	NA	NA
1500	Q61285	109.4	91.2484	85.0702	NA	NA	NA	98.2821	96.8861	110.871	NA	NA	NA
1501	Q61290	87.6	87.0125	95.0123	NA	NA	NA	116.697	113.435	91.6354	NA	NA	NA
1502	Q61301	99.8	96.455	91.4481	106	79.3336	72.4097	104.282	103.806	94.172	133.77	123.214	89.2343
1503	Q61315	81.5	92.4839	91.8233	NA	NA	NA	105.42	108.42	111.823	NA	NA	NA
1504	Q61316	112.6	89.3952	93.1364	116.8	95.2003	69.5826	99.5235	101.299	94.7004	102.993	117.366	99.0381
1505	Q61330	93.6	93.8076	95.6688	90.7	84.2007	77.8814	109.352	100.998	97.0257	145.641	106.376	99.4382
1506	Q61334	96.8	89.7482	97.6385	95.7	91.2093	89.0074	105.11	102.402	99.0338	122.119	106.779	96.0369
1507	Q61335	93.2	93.1899	99.7019	103	97.4392	88.5514	108.214	103.205	92.3752	100.905	108.896	99.9384
1508	Q61361	96.2	75.5403	99.7957	NA	NA	NA	103.144	106.615	111.823	NA	NA	NA
1509	Q61391	NA	NA	NA	98.9	89.4571	77.7902	NA	NA	NA	129.264	98.3092	108.842
1510	Q61411	96.2	92.0426	102.797	97.1	87.3156	89.6457	106.352	100.597	91.7411	111.017	115.854	99.1381
1511	Q61414	NA	NA	NA	78.8	78.1655	78.0638	NA	NA	NA	98.7063	135.314	131.451
1512	Q61418	96.9	92.4839	97.6385	122.8	88.4837	73.6864	108.214	98.9923	96.0744	104.312	116.156	95.4367
1513	Q61481	112.6	84.8946	83.4757	90.9	94.3242	77.1519	97.6613	92.0718	122.603	128.824	109.098	102.139
1514	Q61490	95.2	91.6014	104.767	106.2	84.59	81.3469	106.145	103.907	87.9361	116.623	120.492	92.1354
1515	Q61503	93	118.341	84.4137	NA	NA	NA	105.11	101.299	84.871	NA	NA	NA
1516	Q61527	99.8	87.6302	97.2633	NA	NA	NA	129.836	80.1366	97.0257	NA	NA	NA
1517	Q61543	85.6	85.3358	86.6647	96.7	87.8023	85.1771	115.766	112.733	106.644	125.856	108.09	98.0377
1518	Q61545	76.1	84.5416	100.64	89	103.085	87.457	117.214	121.76	91.1069	127.505	97.9058	96.237
1519	Q61548	153.6	77.8347	74.8468	120.5	92.6694	79.4318	79.4533	81.7413	127.042	107.72	106.275	93.8361
1520	Q61553	101.7	90.1894	94.7309	94.3	82.7405	73.1392	106.455	101.299	96.2858	157.403	108.795	89.4344
1521	Q61584	97.9	93.1016	96.7006	103.4	95.0056	79.523	103.144	100.497	98.8224	127.945	109.602	86.7334
1522	Q61595	103.5	92.5721	83.8509	NA	NA	NA	99.5235	104.509	107.595	NA	NA	NA
1523	Q61598	105.1	86.3948	90.5102	93.5	91.5013	92.3816	87.6262	91.5704	131.587	113.765	90.7469	117.745
1524	Q61625	NA	NA	NA	98.2	95.7844	88.0954	NA	NA	NA	134.65	108.19	76.9296
1525	Q61644	102.8	85.777	101.39	98	91.696	108.523	103.869	105.512	91.1069	111.127	95.7884	92.7357
1526	Q61655	125.4	75.5403	78.6923	NA	NA	NA	96.8337	86.0541	132.75	NA	NA	NA
1527	Q61656	91.6	84.8946	91.9171	104.1	94.7136	86.8187	116.904	101.6	105.587	103.872	107.182	102.539
1528	Q61699	119.3	79.4232	81.9751	100.8	90.3332	72.0449	96.5233	96.3846	120.384	126.076	118.576	95.1366
1529	Q61701	102.7	75.6285	85.3516	NA	NA	NA	127.974	86.5556	116.896	NA	NA	NA
1530	Q61735	99.5	93.2781	97.6385	128.7	97.0498	77.6079	101.489	100.497	97.7655	92.9906	108.09	94.7364
1531	Q61739	105.4	87.9832	94.9185	NA	NA	NA	99.7304	96.8861	106.432	NA	NA	NA
1532	Q61749	NA	NA	NA	83.6	86.0502	68.6706	NA	NA	NA	151.797	117.467	98.1377
1533	Q61753	117.9	72.5398	73.4399	109.8	105.129	68.2147	100.558	95.2813	136.766	120.58	115.148	83.5321
1534	Q61768	109.2	79.7762	84.8826	101.6	86.9262	76.9695	105.11	96.5852	118.376	124.647	110.913	101.339
1535	Q61771	102.7	92.4839	84.4137	92	97.8285	74.5984	93.7301	97.7887	121.018	133.77	113.131	91.8353
1536	Q61772	92.9	99.1025	74.1902	96.7	89.2624	89.281	116.283	99.4938	110.026	95.7386	122.408	105.24
1537	Q61781	NA	NA	NA	85.5	115.155	55.812	NA	NA	NA	121.899	123.92	101.239
1538	Q61792	99.7	88.7775	93.793	93.1	89.9438	83.0796	102.834	106.314	99.7737	115.524	120.794	98.4379
1539	Q61809	95.3	100.691	90.604	NA	NA	NA	103.455	97.6884	102.099	NA	NA	NA
1540	Q61823	NA	NA	NA	93.4	75.1479	58.4567	NA	NA	NA	120.03	140.557	116.745
1541	Q61831	112.5	78.5407	86.3833	100.6	83.8113	82.2589	101.282	97.9893	117.213	124.757	120.492	90.1347
1542	Q61879	88.3	84.5416	104.392	100.5	90.7226	94.9351	101.489	106.214	106.221	110.797	106.275	96.0369
1543	Q61885	95.6	90.9837	91.5419	102.7	94.7136	93.1112	102.317	103.606	107.172	114.315	101.536	93.1358
1544	Q61937	96.3	89.0422	103.641	94	84.8821	79.2494	101.386	99.4938	100.514	122.888	117.467	103.64
1545	Q61990	126.5	76.6875	78.0358	NA	NA	NA	92.3851	88.1603	133.278	NA	NA	NA
1546	Q62048	101.9	94.9548	97.4509	94.1	83.714	84.7212	106.972	103.205	84.9767	139.816	96.3934	104.34
1547	Q62059	94.1	85.9535	96.3254	NA	NA	NA	104.489	102.703	108.123	NA	NA	NA
1548	Q62073	106.4	81.7176	96.1378	NA	NA	NA	113.593	92.5733	101.888	NA	NA	NA
1549	Q62083	114	92.0426	88.2592	90.3	86.8289	84.3564	91.7644	85.5526	120.172	138.497	107.283	95.5367
1550	Q62092	104	88.3362	83.0068	NA	NA	NA	118.663	106.514	91.424	NA	NA	NA
1551	Q62108	91.4	92.6604	93.324	92.9	79.5283	91.6521	113.904	99.0926	100.514	129.264	108.594	99.5383
1552	Q62132	98.8	89.2187	92.4799	90.7	95.2976	89.4633	102.11	98.1899	110.766	113.106	113.333	98.0377
1553	Q62159	94.7	92.2191	95.0123	NA	NA	NA	103.144	110.326	94.9118	NA	NA	NA
1554	Q62167	96.8	92.1309	93.8868	92.8	91.988	76.0575	105.007	97.889	105.375	131.132	104.661	106.141
1555	Q62178	95	98.573	96.4192	100.2	80.015	78.2462	95.2819	102.001	102.205	156.743	99.1158	90.8349
1556	Q62186	NA	NA	NA	80.7	88.289	93.7496	NA	NA	NA	119.041	105.67	112.743
1557	Q62188	114.1	87.3655	87.3213	89	89.8465	64.5668	100.144	90.9686	112.351	123.438	125.332	111.343
1558	Q62192	NA	NA	NA	91.7	82.7405	79.8878	NA	NA	NA	140.585	116.963	91.8353
1559	Q62205	97.8	87.0125	106.455	100.5	79.2362	98.0358	111.007	96.184	91.8467	114.974	107.787	99.1381
1560	Q62241	96.1	88.601	83.9447	NA	NA	NA	106.558	103.606	113.936	NA	NA	NA
1561	Q62261	110.9	82.2471	90.8854	98.8	90.0412	80.4349	94.7646	95.8831	118.164	125.526	110.812	96.4371
1562	Q62277	91.6	99.4555	97.7323	89.8	102.988	96.8502	100.455	99.8949	100.302	108.379	95.2843	105.14
1563	Q62283	95.1	93.3664	105.142	70.5	103.766	88.9162	104.386	102.703	88.4646	110.248	113.333	112.743
1564	Q62288	90.1	91.3367	100.077	NA	NA	NA	113.49	100.296	95.1232	NA	NA	NA
1565	Q62313	87.3	83.2178	91.2606	84.8	93.0588	81.4381	118.559	111.329	101.042	122.668	96.9984	122.447
1566	Q62351	91.9	92.4839	97.2633	130.4	85.8555	65.4788	106.662	104.308	97.7655	97.7171	141.868	80.0308
1567	Q62361	88.2	87.189	103.36	NA	NA	NA	105.938	103.907	102.31	NA	NA	NA
1568	Q62393	NA	NA	NA	127	108.147	82.5324	NA	NA	NA	66.5004	129.163	82.8319
1569	Q62406	115.3	71.9221	94.6371	NA	NA	NA	95.5922	83.9479	133.278	NA	NA	NA
1570	Q62407	91.4	86.0418	92.9488	NA	NA	NA	111.731	102.302	107.912	NA	NA	NA
1571	Q62415	100.9	87.1008	90.3226	88.6	84.006	97.5798	107.386	98.3905	108.018	102.773	110.812	114.744
1572	Q62417	99.1	84.1003	94.0744	150	93.9349	65.114	108.938	100.396	105.587	116.293	104.661	72.6279
1573	Q62418	131	68.5687	85.0702	NA	NA	NA	100.558	82.0422	128.522	NA	NA	NA
1574	Q62419	117.5	82.5119	91.3544	114.5	102.793	111.715	94.6612	96.2843	109.92	76.7228	99.015	89.3344
1575	Q62420	138.4	76.4227	86.1957	97.3	97.5365	112.901	86.1779	82.9449	123.766	98.8163	82.1764	107.341
1576	Q62421	105.4	87.3655	98.0137	103.1	96.4657	77.7902	104.179	90.5674	105.904	124.867	113.333	86.6333
1577	Q62425	97.4	85.3358	112.739	105.8	102.112	84.5388	100.351	92.5733	101.888	117.612	103.149	87.3336
1578	Q62433	100.6	91.7779	89.9475	NA	NA	NA	100.972	101.299	106.644	NA	NA	NA
1579	Q62442	97	97.161	99.3268	109.6	110.094	87.0922	99.2132	98.6914	98.0826	110.907	81.3697	100.239
1580	Q62443	97.9	93.2781	99.4206	103.2	94.1295	80.5261	103.455	102.402	93.3264	119.591	110.812	93.1358
1581	Q62446	88.6	83.1296	82.3502	NA	NA	NA	123.318	113.636	102.416	NA	NA	NA
1582	Q62448	105.9	80.9234	92.6675	NA	NA	NA	112.248	90.4671	110.871	NA	NA	NA
1583	Q62465	98	85.0711	89.1971	93.2	96.4657	93.8408	109.455	100.798	110.343	117.063	98.8133	100.239
1584	Q63810	104.5	92.7486	93.4178	129	68.334	71.2241	91.661	94.5793	114.148	107.39	131.785	94.4363
1585	Q63844	129.4	77.3935	75.7847	88.4	90.6252	79.523	92.799	86.1544	133.701	153.665	104.157	88.1339
1586	Q63912	98.4	85.3358	86.6647	105.3	83.3246	81.8029	106.972	107.618	107.489	124.977	112.224	94.5364
1587	Q63932	138.2	74.746	71.0951	94.5	95.0056	85.8155	88.6608	84.4493	138.88	106.401	118.273	99.7384
1588	Q63943	NA	NA	NA	102.3	78.6522	72.3185	NA	NA	NA	134.869	97.6034	118.045
1589	Q63959	99.9	108.104	90.135	100.7	99.5807	78.7934	105.214	94.0778	91.0012	137.837	104.258	81.7314
1590	Q64008	NA	NA	NA	100.5	99.2887	74.7808	NA	NA	NA	131.132	108.594	88.6341
1591	Q64096	111.2	93.6311	84.6013	101.1	88.4837	74.2336	105.007	90.768	106.115	142.454	112.325	85.733
1592	Q640M6	89.4	93.1016	95.4812	106.8	96.3684	90.7401	109.972	101.199	101.465	122.119	66.8502	117.245
1593	Q640R3	101.4	90.8072	102.61	95	82.7405	79.7054	105.938	99.2932	89.7329	137.288	108.795	99.7384
1594	Q64105	96.6	88.8657	95.575	128.6	90.1385	80.7997	108.938	83.3461	118.798	113.106	105.065	83.132
1595	Q64133	106.3	92.2191	94.4495	93.3	85.4661	85.1771	100.558	96.4849	100.619	136.628	108.795	93.3359
1596	Q64152	90.5	89.6599	87.0399	NA	NA	NA	101.593	109.624	113.831	NA	NA	NA
1597	Q641K1	119.2	88.4245	63.2165	NA	NA	NA	107.8	97.889	117.741	NA	NA	NA
1598	Q641P0	92.1	84.2768	94.6371	107.6	82.5459	74.5072	112.248	100.597	108.546	149.818	101.334	89.2343
1599	Q64237	106.6	93.8076	94.2619	91.8	86.1475	74.872	102.42	97.0867	95.9688	134.869	114.744	101.039
1600	Q64288	NA	NA	NA	102.8	87.1209	75.0544	NA	NA	NA	142.674	103.25	93.2359
1601	Q64310	NA	NA	NA	96.2	88.8731	93.1112	NA	NA	NA	123.878	122.609	76.2293
1602	Q64322	98.4	90.0129	94.7309	94.3	92.6694	79.7054	103.455	102.302	102.205	125.746	112.425	97.2374
1603	Q64331	86.4	81.6294	95.575	92.8	88.3864	90.4665	110.283	112.833	105.798	116.293	99.8216	112.443
1604	Q64332	129.5	68.8334	89.5723	104.3	99.678	89.3722	110.904	76.5259	119.961	110.028	104.964	91.035
1605	Q64373	114.8	79.8644	82.5378	NA	NA	NA	108.007	88.2606	120.806	NA	NA	NA
1606	Q64378	NA	NA	NA	103.7	89.9438	80.4349	NA	NA	NA	105.851	130.171	90.2347
1607	Q64430	NA	NA	NA	99.6	84.006	70.5858	NA	NA	NA	130.912	125.231	93.4359
1608	Q64433	NA	NA	NA	104.8	102.501	108.615	NA	NA	NA	104.532	85.5038	91.035
1609	Q64442	NA	NA	NA	124.1	106.589	61.4662	NA	NA	NA	111.237	95.5868	103.04
1610	Q64444	88.2	108.633	95.3875	110.6	88.289	71.1329	101.593	100.597	93.6435	119.921	126.642	86.0331
1611	Q64471	106.6	83.5708	96.8881	NA	NA	NA	106.041	95.7828	102.839	NA	NA	NA
1612	Q64487	94.8	98.3965	102.234	100.5	101.235	87.457	101.593	96.8861	95.0175	118.711	109.703	82.7318
1613	Q64514	119.2	77.8347	88.5406	79.2	77.5814	58.7303	98.7993	99.2932	109.709	139.486	126.844	124.048
1614	Q64516	NA	NA	NA	93.7	96.7578	86.2715	NA	NA	NA	116.733	111.215	95.9369
1615	Q64518	95.8	89.0422	98.8578	91.3	96.2711	100.863	104.179	100.697	102.099	135.419	96.7967	80.0308
1616	Q64520	155.7	72.8928	66.4992	NA	NA	NA	80.5913	75.4227	145.539	NA	NA	NA
1617	Q64521	NA	NA	NA	98.7	96.4657	88.6426	NA	NA	NA	114.095	108.392	93.7361
1618	Q64735	99.5	87.1008	97.6385	NA	NA	NA	105.214	98.9923	102.733	NA	NA	NA
1619	Q64737	111.6	82.9531	85.0702	103.9	64.635	78.155	107.179	95.3816	110.871	188.509	78.9498	94.2362
1620	Q66GT5	NA	NA	NA	90.1	89.5545	82.7148	NA	NA	NA	130.253	110.812	98.9381
1621	Q66JS6	104.1	87.542	103.36	NA	NA	NA	111.835	99.8949	83.2857	NA	NA	NA
1622	Q66L42	98.7	83.8356	92.3861	NA	NA	NA	105.524	101.7	110.343	NA	NA	NA
1623	Q66L44	105.1	95.9256	103.735	NA	NA	NA	100.662	99.7946	83.2857	NA	NA	NA
1624	Q68ED2	97.3	96.808	91.5419	NA	NA	NA	102.213	99.6944	102.839	NA	NA	NA
1625	Q68ED7	95.1	89.1305	95.4812	NA	NA	NA	109.041	88.6618	114.571	NA	NA	NA
1626	Q68EF0	114	83.1296	75.6909	NA	NA	NA	107.076	96.8861	117.319	NA	NA	NA
1627	Q68FD5	129	72.8928	72.7833	110.8	99.7754	82.2589	89.6953	91.3698	140.571	108.929	105.266	93.0358
1628	Q68FE2	98	93.8958	94.0744	107.9	88.7757	79.2494	102.524	97.1869	104.953	128.274	104.863	93.4359
1629	Q68FE7	96.5	97.0728	98.4826	NA	NA	NA	108.524	93.0748	96.0744	NA	NA	NA
1630	Q68FF6	107.1	83.9238	91.1668	95.2	87.8997	80.5261	102.006	94.0778	114.359	140.585	105.266	94.0362
1631	Q68FL4	103.3	89.0422	102.891	110.5	93.2535	90.5577	102.006	97.1869	95.8631	117.612	104.964	83.232
1632	Q68FL6	98.9	83.8356	88.4468	105.1	92.1827	56.268	114.421	105.311	101.57	105.741	121.298	121.947
1633	Q68FM6	95.1	84.7181	94.0744	NA	NA	NA	107.696	112.532	97.6598	NA	NA	NA
1634	Q69Z26	NA	NA	NA	113	87.997	81.3469	NA	NA	NA	108.709	108.392	101.139
1635	Q69Z98	100.3	90.5424	88.2592	99.8	95.0056	87.457	103.765	97.889	110.977	112.336	100.83	104.54
1636	Q69ZF3	90.9	92.1309	103.36	83.4	77.7761	66.7555	100.558	102.904	100.196	144.102	119.685	113.644
1637	Q69ZH9	102.6	84.1003	81.5061	88.5	72.1303	89.3722	104.696	107.417	112.88	153.665	105.771	94.7364
1638	Q69ZK0	93.2	90.2777	90.5102	NA	NA	NA	110.386	97.5881	109.92	NA	NA	NA
1639	Q69ZK9	102.1	83.6591	94.4495	90.8	88.5811	81.5293	105.938	107.116	98.6111	126.186	116.761	98.2378
1640	Q69ZP3	95.2	98.0435	90.5102	98.9	94.2269	81.2557	106.765	99.5941	100.091	129.593	100.83	97.2374
1641	Q69ZS6	89.6	93.1016	106.361	104.6	95.2976	102.14	108.938	100.798	90.5784	108.049	76.6307	111.243
1642	Q69ZS7	117.8	76.864	84.1323	NA	NA	NA	94.2473	100.798	120.172	NA	NA	NA
1643	Q69ZS8	99.3	84.9828	90.0413	NA	NA	NA	110.386	98.3905	109.497	NA	NA	NA
1644	Q69ZU6	95.4	92.1309	105.423	NA	NA	NA	101.8	96.2843	98.6111	NA	NA	NA
1645	Q69ZX8	108.3	94.6901	87.5088	106.8	78.3602	71.8625	100.248	98.5911	101.253	170.483	85.5038	94.1362
1646	Q69ZZ6	100.2	89.307	94.2619	NA	NA	NA	105.214	98.892	103.367	NA	NA	NA
1647	Q6A039	NA	NA	NA	87.5	81.0857	92.7464	NA	NA	NA	142.674	98.3092	100.239
1648	Q6A065	97.4	92.3074	95.0123	108.7	93.7402	80.8909	99.8339	101.7	104.424	120.14	102.544	95.3367
1649	Q6A0A9	89.9	82.1589	91.8233	90.3	91.988	85.5419	112.145	106.214	110.766	129.483	105.065	99.4382
1650	Q6A152	NA	NA	NA	97.4	86.8289	72.7745	NA	NA	NA	150.148	104.762	93.1358
1651	Q6A4J8	102.3	88.601	85.8206	89.3	94.9083	85.2683	102.213	97.7887	115.733	125.087	108.291	98.5379
1652	Q6AW69	95	101.309	90.8854	NA	NA	NA	94.9715	102.503	104.953	NA	NA	NA
1653	Q6AXF6	93.6	96.8963	98.0137	105.1	88.4837	78.8846	104.076	101.098	95.8631	123.108	113.434	92.9357
1654	Q6DFV3	106.7	86.3948	89.9475	81.7	89.6518	73.7776	100.144	102.804	105.904	169.274	105.67	86.5333
1655	Q6DID7	NA	NA	NA	97	104.448	79.8878	NA	NA	NA	103.543	109.703	105.14
1656	Q6EDY6	93.9	88.601	90.604	NA	NA	NA	111.11	104.107	103.473	NA	NA	NA
1657	Q6GQS1	NA	NA	NA	89.4	83.3246	75.4192	NA	NA	NA	159.161	109.4	89.1343
1658	Q6GQT5	98.2	105.103	89.3847	113	87.2183	69.8562	106.145	112.231	77.0498	142.674	84.2938	107.441
1659	Q6GQT9	96.8	83.5708	102.141	94.8	86.6342	77.6991	116.697	104.007	87.8304	140.255	107.081	97.1374
1660	Q6GV12	100.4	87.4537	94.5433	NA	NA	NA	106.248	102.503	100.091	NA	NA	NA
1661	Q6GYP7	100.8	91.3367	96.044	95.3	99.5807	83.4444	105.007	95.181	102.522	113.325	114.543	94.2362
1662	Q6I6G8	112.7	83.5708	94.3557	89.5	80.6964	95.5735	111.11	90.0659	100.091	139.926	91.3519	105.04
1663	Q6IFX2	82.7	79.8644	80.0992	72.1	114.085	63.7461	82.6604	153.252	115.099	125.197	127.751	100.339
1664	Q6IME9	68.2	70.7749	97.9199	79.2	104.545	74.5984	89.4884	142.822	125.034	106.181	144.086	92.0354
1665	Q6IR34	NA	NA	NA	110.5	96.4657	77.2431	NA	NA	NA	123.108	96.4942	97.9377
1666	Q6IRU2	NA	NA	NA	109.9	85.5635	76.4223	NA	NA	NA	127.615	120.996	82.2316
1667	Q6IRU5	100.5	80.9234	84.4137	110.3	100.943	101.045	101.282	105.411	121.335	91.2319	115.349	77.7299
1668	Q6KAR6	99	88.5127	93.6992	NA	NA	NA	109.662	95.4819	105.375	NA	NA	NA
1669	Q6NS52	107.3	92.4839	99.4206	77.7	96.1737	90.4665	99.2132	100.998	90.1557	104.862	130.171	99.7384
1670	Q6NS60	95.7	90.3659	91.7295	68.3	69.4047	100.863	106.352	101.098	106.221	158.062	75.1183	131.651
1671	Q6NS65	103.8	94.1606	99.8895	61.6	92.0854	124.665	97.351	101.901	92.1638	155.204	89.2345	77.4298
1672	Q6NS82	101.6	83.3061	96.9819	93.7	80.307	83.9004	101.593	102.904	105.481	113.435	116.559	113.043
1673	Q6NVE8	NA	NA	NA	103.2	98.0232	84.8123	NA	NA	NA	121.789	102.242	90.935
1674	Q6NVF0	111.5	97.4258	101.109	95.1	92.0854	88.0042	91.8679	88.2606	98.8224	122.119	101.838	101.639
1675	Q6NVG1	102	91.0719	95.4812	86.1	95.979	83.4444	108.938	97.5881	95.6517	123.658	114.744	97.5375
1676	Q6NXH9	NA	NA	NA	70.4	133.261	70.221	NA	NA	NA	91.2319	128.961	104.74
1677	Q6NXK7	106.3	96.1903	95.0123	114.2	94.5189	81.9853	97.6613	98.2902	96.1801	116.733	106.275	87.2336
1678	Q6NXK8	105.3	95.7491	85.3516	NA	NA	NA	101.489	100.396	102.522	NA	NA	NA
1679	Q6NZJ6	120.3	82.7766	89.0095	92.2	85.0768	70.9505	93.2128	86.355	121.335	168.834	87.2179	102.439
1680	Q6NZL0	95.4	86.5713	95.575	87.9	90.3332	90.7401	109.766	102.101	102.205	129.154	108.695	94.4363
1681	Q6P069	106.2	78.4525	88.353	105.1	97.8285	81.6205	106.765	96.4849	117.424	118.382	103.956	94.0362
1682	Q6P1B3	NA	NA	NA	111	85.0768	86.1803	NA	NA	NA	128.604	97.5025	93.4359
1683	Q6P1D5	97	97.9553	98.4826	95.6	87.2183	74.0512	99.0063	94.6795	102.522	137.727	110.409	98.838
1684	Q6P1F6	112.5	80.6587	88.4468	87.1	95.5897	86.7275	101.386	98.7917	111.4	133.221	105.266	94.1362
1685	Q6P1J0	NA	NA	NA	61.9	67.5552	113.357	NA	NA	NA	138.277	82.6805	136.653
1686	Q6P2L7	NA	NA	NA	88.9	90.0412	84.7212	NA	NA	NA	134.32	99.4183	105.04
1687	Q6P4S6	110.5	83.3943	87.6964	95.4	99.8727	92.1992	101.593	95.0807	114.888	118.931	100.628	93.0358
1688	Q6P4T0	89.5	95.3961	77.6606	104.4	96.0764	86.7275	111.524	96.9864	121.546	124.867	96.4942	92.5356
1689	Q6P4T1	105.7	78.8054	85.4454	NA	NA	NA	112.766	112.231	98.1883	NA	NA	NA
1690	Q6P542	103.1	84.8063	86.5709	NA	NA	NA	113.076	100.697	104.318	NA	NA	NA
1691	Q6P549	NA	NA	NA	86.3	83.714	75.9663	NA	NA	NA	131.132	99.2166	126.849
1692	Q6P5D3	88.3	78.4525	101.296	NA	NA	NA	97.351	105.11	122.498	NA	NA	NA
1693	Q6P5E4	96.7	95.9256	99.3268	92.9	90.8199	82.3501	103.144	96.8861	97.6598	140.255	102.141	94.7364
1694	Q6P5E8	103.6	95.7491	92.4799	100.3	90.0412	81.6205	99.5235	93.0748	106.01	128.824	106.779	94.6364
1695	Q6P5F6	92.9	88.1597	100.734	87	93.8375	86.4539	108.317	109.122	91.2126	119.481	110.51	103.64
1696	Q6P5F7	96.8	87.4537	105.798	93	92.28	89.1898	109.352	98.4908	92.3752	112.006	103.956	109.442
1697	Q6P5F9	128	72.4516	74.0027	NA	NA	NA	106.662	82.3431	132.855	NA	NA	NA
1698	Q6P5U7	105.6	90.1012	85.0702	82.6	94.5189	83.6268	104.282	95.6825	111.4	156.413	92.7635	94.3363
1699	Q6P6J9	98.1	74.9225	84.3199	NA	NA	NA	114.214	96.2843	127.571	NA	NA	NA
1700	Q6P8X1	125.8	91.2484	90.6978	103.1	101.625	90.1929	81.1086	79.4345	123.026	112.666	104.46	87.4336
1701	Q6P9K8	83.8	69.8924	85.9144	98.1	82.8379	74.9632	141.526	102.202	112.668	145.421	101.536	101.739
1702	Q6P9K9	101.4	92.4839	97.5447	100	92.7668	79.2494	101.696	101.5	95.3346	127.725	108.291	94.2362
1703	Q6P9Q4	NA	NA	NA	94.5	72.7143	81.1645	NA	NA	NA	148.389	95.1834	112.443
1704	Q6P9R2	147.6	72.8046	78.9737	NA	NA	NA	80.3844	86.1544	129.156	NA	NA	NA
1705	Q6P9S0	93.1	83.9238	91.2606	NA	NA	NA	110.593	94.9804	119.327	NA	NA	NA
1706	Q6PA06	93.9	92.1309	96.044	95.1	88.4837	81.4381	110.49	101.7	96.3915	131.132	109.098	97.3374
1707	Q6PAJ1	105.7	84.1886	92.4799	103.9	94.4216	88.7338	104.179	95.7828	110.026	105.741	111.82	94.8365
1708	Q6PAK3	99.1	95.4843	92.7612	107.8	90.2359	75.4192	100.144	100.396	102.416	128.824	112.728	87.8338
1709	Q6PAL8	107.3	83.3061	83.4757	97.6	85.5635	80.0702	100.041	98.5911	120.912	129.923	116.459	93.0358
1710	Q6PAM0	115.3	90.1894	78.3171	NA	NA	NA	96.7303	94.7798	117.213	NA	NA	NA
1711	Q6PAR5	102.2	78.0112	91.8233	110.5	90.4306	68.1235	101.282	100.196	120.067	142.234	105.67	87.6337
1712	Q6PB44	124.6	86.836	85.5392	NA	NA	NA	91.5575	87.7591	115.945	NA	NA	NA
1713	Q6PB66	NA	NA	NA	94.2	95.0056	79.6142	NA	NA	NA	118.052	113.938	100.539
1714	Q6PB70	88.5	99.4555	97.0757	NA	NA	NA	107.593	97.9893	98.9281	NA	NA	NA
1715	Q6PB93	98	85.6005	85.0702	89.3	87.5103	86.5451	106.352	101.399	116.684	125.526	110.005	102.639
1716	Q6PCP5	99	85.9535	94.2619	103.8	109.996	80.7085	103.455	103.305	105.798	109.368	106.678	89.4344
1717	Q6PCZ4	98.3	88.0715	97.6385	NA	NA	NA	104.386	94.8801	108.229	NA	NA	NA
1718	Q6PD03	98.6	100.25	78.3171	NA	NA	NA	96.213	76.4257	142.896	NA	NA	NA
1719	Q6PD19	134.4	77.0405	67.062	NA	NA	NA	87.9366	86.4553	143.319	NA	NA	NA
1720	Q6PD26	91.1	86.2183	101.39	NA	NA	NA	106.041	100.898	105.798	NA	NA	NA
1721	Q6PD28	111	88.5127	94.3557	NA	NA	NA	105.834	85.0511	106.749	NA	NA	NA
1722	Q6PDC0	105.7	92.3956	101.953	108.1	92.28	87.457	95.4888	95.4819	98.7168	78.1517	124.222	106.941
1723	Q6PDC8	88.4	95.7491	97.6385	100	111.554	97.8534	105.214	101.801	101.253	103.982	77.4374	106.741
1724	Q6PDG8	102.8	96.9845	90.3226	NA	NA	NA	107.593	88.4612	104.53	NA	NA	NA
1725	Q6PDH0	92.4	80.2174	99.4206	NA	NA	NA	110.904	97.3875	112.351	NA	NA	NA
1726	Q6PDI5	101.8	86.483	89.9475	98.3	89.5545	69.0354	105.834	98.5911	109.603	138.277	112.627	96.5371
1727	Q6PDI6	104.3	83.9238	114.334	NA	NA	NA	85.3502	98.6914	103.473	NA	NA	NA
1728	Q6PDL0	109.5	84.0121	86.8523	90.5	80.4043	70.4034	99.627	94.3787	118.693	160.59	115.047	89.5344
1729	Q6PDS0	91.2	89.8364	103.735	NA	NA	NA	110.179	104.007	91.1069	NA	NA	NA
1730	Q6PDS3	111.3	88.0715	86.7585	96.1	99.386	80.4349	111.731	87.6588	106.855	139.596	97.9058	89.5344
1731	Q6PE13	106.9	92.6604	98.764	87.8	86.9262	76.6047	100.662	98.2902	92.4809	136.518	117.265	98.4379
1732	Q6PER3	113	87.9832	87.0399	107.6	89.5545	81.8029	94.3508	98.0896	111.4	129.044	109.3	84.9327
1733	Q6PEV3	99.1	92.2191	89.1971	NA	NA	NA	103.144	105.411	101.888	NA	NA	NA
1734	Q6PF93	99.3	88.4245	92.9488	90.8	96.1737	88.0954	108.007	98.2902	104.636	112.996	113.938	97.9377
1735	Q6PFD5	97.5	87.2773	94.3557	NA	NA	NA	107.696	101.399	103.367	NA	NA	NA
1736	Q6PFE7	87.5	96.5433	106.924	NA	NA	NA	104.179	96.3846	97.4484	NA	NA	NA
1737	Q6PFX7	100.2	93.7194	82.6316	NA	NA	NA	90.1091	109.222	115.839	NA	NA	NA
1738	Q6PGC1	94.1	101.132	97.9199	NA	NA	NA	96.7303	100.396	98.7168	NA	NA	NA
1739	Q6PGD0	93.7	93.1899	101.109	NA	NA	NA	106.558	98.892	96.4972	NA	NA	NA
1740	Q6PGE7	87.5	90.6307	100.546	90.2	94.1295	99.5861	112.042	103.405	96.3915	113.325	103.048	98.6379
1741	Q6PGF3	112.4	60.6264	67.2496	NA	NA	NA	141.63	118.951	96.8143	NA	NA	NA
1742	Q6PGF7	127.4	72.5398	80.2868	85.6	105.713	78.4286	87.6262	95.4819	132.01	131.352	110.51	90.6349
1743	Q6PGH0	111.7	85.8653	86.2895	89.2	85.4661	87.457	101.8	96.3846	110.66	104.532	106.779	126.149
1744	Q6PGL7	88.1	93.1899	95.8564	NA	NA	NA	116.283	97.7887	99.668	NA	NA	NA
1745	Q6PGN3	94.6	89.7482	92.7612	98.5	87.413	80.8909	105.938	102.703	105.798	132.561	108.896	94.4363
1746	Q6PH08	96.8	90.3659	94.8247	101.6	94.4216	90.5577	99.4201	104.809	104.636	108.269	110.005	94.4363
1747	Q6PHN9	98.7	93.7194	96.9819	104.4	99.094	95.2087	101.696	100.396	98.6111	105.521	101.435	92.8357
1748	Q6PHQ8	104.6	94.8666	93.2302	NA	NA	NA	88.1435	107.317	101.888	NA	NA	NA
1749	Q6PHS6	105.9	88.7775	97.2633	NA	NA	NA	108.421	97.4878	92.798	NA	NA	NA
1750	Q6PHS9	94.1	89.5717	101.109	113.2	88.289	87.0922	103.041	103.305	99.4566	119.371	114.139	78.7303
1751	Q6PHU5	93.9	89.9247	98.5764	80.9	84.1033	93.5672	107.903	104.709	95.546	127.945	106.981	107.741
1752	Q6PHZ2	112.6	83.7473	93.1364	95.6	91.5987	98.2182	94.6612	89.8653	118.481	105.082	114.442	93.636
1753	Q6PIC6	95.8	90.9837	102.985	104.6	94.1295	89.1898	105.938	107.818	86.0337	117.612	102.141	92.5356
1754	Q6PIE5	97.4	89.9247	104.579	112.8	93.7402	86.2715	105.42	107.919	84.2369	110.248	113.232	83.7322
1755	Q6PNC0	101.4	85.6888	92.5737	101.2	98.0232	91.8344	105.317	98.7917	108.335	118.711	99.7208	90.5348
1756	Q6Q477	94.5	93.2781	98.4826	93.9	91.1119	95.9383	106.869	101.199	95.7574	125.197	96.3934	97.8376
1757	Q6QD59	93.8	91.0719	99.7957	NA	NA	NA	109.041	96.8861	99.9851	NA	NA	NA
1758	Q6QI06	97.5	91.1602	100.171	86.4	82.5459	87.457	103.869	99.9952	97.5541	129.703	107.182	108.542
1759	Q6R0H7	NA	NA	NA	99.6	89.8465	85.9979	NA	NA	NA	94.7493	120.391	108.342
1760	Q6R891	99.3	94.7783	111.801	NA	NA	NA	90.4195	88.7621	103.684	NA	NA	NA
1761	Q6RHR9	106.7	97.0728	86.8523	87.5	84.3954	72.6833	103.662	95.8831	100.196	155.754	117.467	87.8338
1762	Q6TEK5	90	87.6302	98.9516	82.4	99.4833	97.215	108.731	102.302	103.684	110.028	113.232	96.4371
1763	Q6URW6	91	86.483	102.516	94.6	89.6518	92.0168	104.282	104.408	102.205	126.186	99.3175	99.0381
1764	Q6VGS5	NA	NA	NA	95.6	106.881	56.6328	NA	NA	NA	105.301	99.7208	137.853
1765	Q6VN19	NA	NA	NA	97.2	88.8731	71.3153	NA	NA	NA	139.926	104.561	102.339
1766	Q6VNB8	102.8	88.4245	93.5116	97.7	91.7933	81.5293	103.662	96.6855	106.538	121.13	112.224	97.1374
1767	Q6WQJ1	100.5	81.5411	83.7571	NA	NA	NA	103.351	117.848	106.115	NA	NA	NA
1768	Q6WVG3	96.9	82.7766	90.9792	94.6	91.7933	86.9099	103.351	105.712	113.091	123.548	111.115	93.1358
1769	Q6X893	91.5	89.4835	101.203	95	90.3332	91.8344	110.697	104.609	92.9037	121.899	110.913	90.6349
1770	Q6Y685	90.4	84.4533	94.3557	NA	NA	NA	112.042	99.0926	112.245	NA	NA	NA
1771	Q6Y7W8	84.2	100.956	104.861	NA	NA	NA	99.627	83.4464	116.367	NA	NA	NA
1772	Q6ZPE2	103.4	87.1008	93.1364	98.7	94.0322	82.8972	105.214	97.1869	105.692	117.942	107.283	100.239
1773	Q6ZPF3	127.1	72.2751	87.0399	109.3	87.0236	89.4633	106.455	84.8505	117.002	121.24	105.266	88.5341
1774	Q6ZPJ0	98.9	95.9256	93.2302	NA	NA	NA	106.869	94.7798	100.725	NA	NA	NA
1775	Q6ZPJ3	99.1	95.9256	95.2937	NA	NA	NA	112.662	82.4434	105.164	NA	NA	NA
1776	Q6ZPQ6	104.4	93.1016	99.3268	95.7	89.8465	79.7966	99.2132	94.8801	98.9281	128.824	107.888	100.239
1777	Q6ZPR4	NA	NA	NA	88.9	95.687	88.825	NA	NA	NA	133.001	102.242	93.0358
1778	Q6ZPS6	NA	NA	NA	87	93.3508	73.0481	NA	NA	NA	163.338	97.6034	91.7353
1779	Q6ZQ06	89.7	93.0134	111.989	92	65.8031	56.9063	117.421	84.6499	92.6923	126.296	151.648	112.743
1780	Q6ZQ08	117.4	79.5997	80.9433	NA	NA	NA	103.558	87.4582	125.563	NA	NA	NA
1781	Q6ZQ18	97.1	93.0134	95.9502	NA	NA	NA	105.731	105.612	92.5866	NA	NA	NA
1782	Q6ZQ29	96.4	85.5123	93.5116	92.7	94.5189	74.7808	104.386	104.809	107.278	152.896	101.233	88.7341
1783	Q6ZQ38	129.1	76.158	75.5033	103.5	98.4126	73.6864	88.5573	86.2547	140.148	115.524	115.854	94.6364
1784	Q6ZQ58	103.5	89.8364	98.8578	101	100.554	82.5324	97.9717	95.5822	105.058	122.449	96.1917	98.4379
1785	Q6ZQ82	99.2	87.3655	89.0095	92.1	91.1119	93.476	108.524	99.4938	108.546	113.106	103.149	106.741
1786	Q6ZQB6	NA	NA	NA	103.5	85.5635	78.7934	NA	NA	NA	114.974	85.3021	133.051
1787	Q6ZQI3	95.9	95.5726	97.9199	106.1	106.687	91.6521	104.076	103.706	92.2695	116.403	68.4635	110.042
1788	Q6ZQK5	113.8	90.1894	89.0095	85.1	109.023	91.1049	84.9364	76.0245	138.563	107.39	107.686	98.4379
1789	Q6ZWN5	91.9	88.6892	97.0757	87.6	87.413	82.806	106.248	107.517	99.668	101.894	114.139	125.848
1790	Q6ZWQ0	NA	NA	NA	98.3	89.9438	87.8218	NA	NA	NA	137.397	93.5702	95.1366
1791	Q6ZWR6	131.7	81.2764	82.6316	NA	NA	NA	111.317	79.3342	107.172	NA	NA	NA
1792	Q6ZWU9	82.3	91.3367	90.7916	88.9	95.687	108.797	109.455	109.122	108.758	60.7846	111.72	127.449
1793	Q6ZWV3	89.4	91.6014	96.6068	80.4	94.7136	108.979	110.076	106.815	96.1801	104.862	100.225	108.042
1794	Q6ZWV7	88.1	93.5429	89.1971	81.7	83.8113	105.058	104.593	110.025	105.692	115.854	87.117	125.248
1795	Q6ZWX6	97	95.2196	93.1364	101	85.5635	58.8215	100.972	104.91	99.0338	150.148	120.693	90.4348
1796	Q6ZWY8	NA	NA	NA	91.4	83.2273	101.592	NA	NA	NA	115.524	82.0755	125.248
1797	Q71KT5	103.4	92.4839	95.7626	NA	NA	NA	102.524	91.771	104.847	NA	NA	NA
1798	Q71LX4	104.6	82.0706	88.2592	100.3	96.2711	77.1519	104.489	97.0867	116.79	125.856	106.174	96.5371
1799	Q71M36	97.9	85.777	107.205	78.6	97.9259	82.9884	105.524	99.4938	94.4891	153.555	110.711	80.3309
1800	Q766D5	93	91.1602	91.1668	NA	NA	NA	105.317	108.922	101.57	NA	NA	NA
1801	Q76K27	NA	NA	NA	71.6	83.0326	69.4914	NA	NA	NA	200.271	96.2926	89.2343
1802	Q76MZ3	119.3	73.9518	80.7557	NA	NA	NA	90.8333	90.1662	140.677	NA	NA	NA
1803	Q78IK2	NA	NA	NA	106.3	96.6604	76.5135	NA	NA	NA	111.457	120.391	89.8346
1804	Q78PY7	94.6	96.9845	90.9792	97.8	94.3242	58.2743	102.42	103.806	101.57	128.714	122.71	102.639
1805	Q78ZA7	105.6	89.0422	101.296	100	87.8997	80.7997	87.4193	90.3668	117.213	136.188	97.9058	100.239
1806	Q791T5	NA	NA	NA	109.8	101.138	82.2589	NA	NA	NA	106.181	114.644	85.733
1807	Q791V5	NA	NA	NA	113.4	102.404	76.4223	NA	NA	NA	118.272	110.711	80.2309
1808	Q7M6Y3	118.5	89.0422	98.4826	99.3	87.413	79.067	94.1439	91.3698	98.9281	114.535	120.794	100.439
1809	Q7M6Z0	94.2	92.1309	98.0137	NA	NA	NA	108.11	101.199	96.7086	NA	NA	NA
1810	Q7M729	90.8	109.869	95.8564	112	94.7136	85.1771	100.765	102.804	87.302	126.516	90.5453	92.5356
1811	Q7M750	101.3	85.1593	94.3557	94.5	83.5193	82.3501	115.145	99.8949	95.8631	135.529	109.501	97.5375
1812	Q7M759	NA	NA	NA	89.4	91.404	92.8376	NA	NA	NA	127.505	106.981	92.9357
1813	Q7SIG6	NA	NA	NA	92.1	84.2007	76.6047	NA	NA	NA	136.958	123.113	90.8349
1814	Q7TMB8	99.2	90.3659	97.4509	88.1	94.0322	92.4728	104.489	98.4908	100.725	125.746	96.4942	103.84
1815	Q7TMC8	NA	NA	NA	98.9	86.8289	81.5293	NA	NA	NA	122.009	111.921	100.439
1816	Q7TME0	91.3	87.8067	99.3268	NA	NA	NA	109.972	109.423	93.0094	NA	NA	NA
1817	Q7TMF3	NA	NA	NA	109.9	104.448	90.7401	NA	NA	NA	86.1757	118.273	87.7337
1818	Q7TMK9	89.6	81.4529	84.5075	96.8	89.3598	74.872	111.835	122.06	103.79	132.231	109.905	100.038
1819	Q7TMM9	134.1	74.3048	77.942	98.7	104.934	101.592	87.9366	81.0393	140.36	96.7278	104.762	90.3347
1820	Q7TMQ7	131.3	70.1571	74.5654	NA	NA	NA	110.904	91.0689	118.058	NA	NA	NA
1821	Q7TN29	113.8	82.0706	101.203	105.5	93.6428	100.498	97.4544	82.9449	114.676	99.2559	107.485	91.1351
1822	Q7TN79	93.1	87.0125	106.736	119.3	71.8383	99.0389	110.904	104.91	87.4077	77.0525	114.845	114.344
1823	Q7TN99	104	69.8924	87.2275	NA	NA	NA	131.491	85.9538	117.319	NA	NA	NA
1824	Q7TNC4	NA	NA	NA	88.6	93.3508	87.7306	NA	NA	NA	111.567	114.24	104.54
1825	Q7TNF0	NA	NA	NA	98.5	88.3864	78.9758	NA	NA	NA	129.154	109.501	97.9377
1826	Q7TNG5	95.4	84.8063	96.3254	NA	NA	NA	112.766	108.32	93.8549	NA	NA	NA
1827	Q7TNI2	96.9	94.4253	99.4206	NA	NA	NA	100.558	102.603	95.6517	NA	NA	NA
1828	Q7TNM2	100.3	89.0422	93.324	97.2	90.9173	71.9537	118.456	98.1899	91.8467	140.365	106.577	97.2374
1829	Q7TNR6	97.3	89.8364	99.233	NA	NA	NA	98.9028	103.907	101.465	NA	NA	NA
1830	Q7TPB0	100.8	87.1008	94.2619	NA	NA	NA	100.351	106.013	102.839	NA	NA	NA
1831	Q7TPD3	100.7	93.3664	88.7282	86.5	83.3246	70.221	106.455	99.8949	101.993	163.228	107.081	96.137
1832	Q7TPH6	99.9	94.5136	99.3268	102.7	92.6694	78.2462	105.214	97.5881	93.0094	125.966	111.619	91.1351
1833	Q7TPM6	94.1	93.0134	89.2909	106	96.0764	76.2399	106.455	101.801	106.644	127.065	110.207	86.9334
1834	Q7TPR4	103.1	85.6888	101.109	84.8	82.5459	74.5072	96.8337	93.476	111.294	166.086	110.61	87.8338
1835	Q7TPS5	106.1	88.4245	94.4495	93.7	90.5279	86.9099	106.869	94.479	100.831	120.91	103.653	105.341
1836	Q7TQ95	101.5	92.0426	95.9502	100.7	92.28	85.2683	102.938	102.603	95.2289	118.382	107.586	96.5371
1837	Q7TQD2	90.1	86.836	94.0744	101.5	89.6518	86.4539	108.628	110.526	101.465	122.998	103.855	96.8372
1838	Q7TQF7	122	90.8072	98.295	127.1	99.1913	75.8751	90.1091	84.1485	105.058	96.0683	110.005	91.3351
1839	Q7TQG1	89.9	95.3961	86.7585	NA	NA	NA	106.558	106.916	105.692	NA	NA	NA
1840	Q7TQH0	89.2	83.7473	95.7626	NA	NA	NA	112.455	100.096	111.294	NA	NA	NA
1841	Q7TQI3	118	79.0702	87.3213	NA	NA	NA	91.4541	89.4641	128.628	NA	NA	NA
1842	Q7TQK5	95.4	83.3943	83.0068	102.1	94.6162	71.0417	110.697	103.606	117.741	133.77	114.442	87.5337
1843	Q7TSC1	93.7	83.5708	87.6964	107.5	96.7578	84.4476	109.041	105.211	113.936	130.143	88.932	93.8361
1844	Q7TSF4	99.9	93.5429	82.3502	NA	NA	NA	105.11	104.308	106.538	NA	NA	NA
1845	Q7TSH2	91.2	87.9832	89.7599	103.5	94.0322	67.0291	109.869	99.5941	114.042	130.143	101.435	107.341
1846	Q7TSJ2	87.1	86.13	88.6344	96.9	94.2269	90.7401	109.455	109.222	112.245	116.953	98.6116	102.74
1847	Q7TSK2	95.5	93.4546	100.827	NA	NA	NA	104.076	96.184	100.091	NA	NA	NA
1848	Q7TT15	NA	NA	NA	90	82.0592	78.7022	NA	NA	NA	148.169	109.905	95.6368
1849	Q7TT37	99.3	90.0129	93.1364	101.6	90.2359	77.4255	103.351	98.9923	106.538	126.626	106.174	100.339
1850	Q7TT50	99	90.2777	91.1668	108.1	80.4043	79.7054	106.455	102.101	102.205	117.063	114.24	102.139
1851	Q80SW1	102.9	86.3065	106.455	95.2	94.2269	89.6457	101.386	102.603	90.3671	118.272	111.215	91.9354
1852	Q80SY4	NA	NA	NA	74.4	102.696	72.7745	NA	NA	NA	131.352	129.163	92.7357
1853	Q80SZ7	99.8	89.8364	100.827	NA	NA	NA	106.041	100.196	93.6435	NA	NA	NA
1854	Q80T23	107.4	106.251	92.7612	NA	NA	NA	89.5919	91.6707	100.725	NA	NA	NA
1855	Q80T41	97	93.6311	92.5737	80.6	79.8203	109.344	110.593	106.314	90.1557	132.231	90.8477	107.141
1856	Q80TA6	103.6	93.4546	88.8219	NA	NA	NA	106.352	92.5733	106.327	NA	NA	NA
1857	Q80TA9	NA	NA	NA	72.2	102.696	91.3785	NA	NA	NA	146.521	95.1834	94.3363
1858	Q80TB8	117.9	78.7172	76.5351	91.1	94.1295	87.1834	112.455	87.1573	122.286	111.567	108.997	106.941
1859	Q80TE4	94.5	86.483	92.2923	90.6	76.2186	73.3216	112.766	97.4878	108.758	187.63	95.8892	84.9327
1860	Q80TE7	NA	NA	NA	90.1	82.3512	85.5419	NA	NA	NA	131.572	108.795	103.94
1861	Q80TI0	93.5	91.1602	100.171	99.5	87.413	77.6079	111.731	104.408	89.2044	134.65	111.014	92.9357
1862	Q80TJ1	141.4	69.2747	73.6275	89.1	95.2003	80.4349	83.2811	81.0393	148.287	141.684	107.989	88.9342
1863	Q80TK0	84.6	88.1597	89.4785	NA	NA	NA	103.455	109.824	116.896	NA	NA	NA
1864	Q80TL0	132.8	70.5101	74.9406	NA	NA	NA	96.1095	96.6855	124.823	NA	NA	NA
1865	Q80TL1	96.1	93.2781	93.8868	NA	NA	NA	109.662	104.208	93.2207	NA	NA	NA
1866	Q80TL4	117.6	83.7473	85.3516	101	84.7847	90.8313	96.8337	94.0778	115.416	114.535	105.065	103.94
1867	Q80TL7	107.2	81.9824	83.8509	NA	NA	NA	100.765	99.4938	120.384	NA	NA	NA
1868	Q80TM9	125.3	75.452	81.7875	NA	NA	NA	97.351	83.5467	131.693	NA	NA	NA
1869	Q80TN4	92.6	91.6014	90.9792	75.1	94.4216	82.4412	99.0063	93.1751	124.717	147.07	109.4	95.2366
1870	Q80TN5	85.3	89.6599	84.9764	104.3	95.2976	84.174	113.697	114.739	103.896	118.711	108.392	90.0346
1871	Q80TN7	87.6	95.9256	91.073	NA	NA	NA	109.662	103.706	102.733	NA	NA	NA
1872	Q80TQ2	116	75.7168	80.9433	NA	NA	NA	97.4544	91.5704	133.595	NA	NA	NA
1873	Q80TR1	96.4	92.3074	102.891	101.8	83.8113	67.3939	97.6613	97.5881	103.262	145.861	113.938	92.5356
1874	Q80TS3	93.1	94.9548	102.797	96.7	87.0236	83.718	106.352	102.603	89.4158	130.253	104.863	99.5383
1875	Q80TT2	101.1	92.7486	98.8578	99.8	89.5545	88.0042	103.041	94.0778	100.408	113.106	114.644	95.0366
1876	Q80TT8	92.8	86.3948	88.9157	NA	NA	NA	114.007	92.0718	118.904	NA	NA	NA
1877	Q80TV8	96.7	93.5429	92.1985	97.2	91.1119	78.3374	101.593	97.1869	109.92	136.628	103.855	96.0369
1878	Q80TY0	109.1	99.279	96.7006	102.6	97.8285	89.8281	96.1095	91.5704	96.3915	110.248	104.561	94.4363
1879	Q80TZ3	115.1	76.511	88.8219	105.3	90.9173	80.8909	125.077	79.5348	109.18	117.063	115.854	91.2351
1880	Q80U12	110.7	83.9238	86.9461	93.2	89.3598	72.3185	109.972	103.506	97.2371	133.66	121.903	93.2359
1881	Q80U22	97.1	91.3367	98.8578	NA	NA	NA	105.11	100.096	97.8712	NA	NA	NA
1882	Q80U23	95.4	90.5424	94.1681	86.8	93.7402	87.8218	104.593	98.5911	108.018	126.735	105.972	100.139
1883	Q80U28	108.1	78.0112	85.7268	102.6	91.5987	87.1834	112.869	91.6707	118.058	121.569	96.2926	101.639
1884	Q80U30	104	88.0715	89.0095	94.2	93.2535	82.0765	103.144	96.8861	111.083	122.449	107.586	101.939
1885	Q80U49	101	91.5132	91.1668	105.2	92.1827	75.7839	104.179	94.7798	108.758	123.878	103.25	101.939
1886	Q80U56	133.9	77.1287	75.222	NA	NA	NA	89.4884	87.6588	131.693	NA	NA	NA
1887	Q80U57	92.9	83.3943	89.1971	NA	NA	NA	112.559	95.7828	119.644	NA	NA	NA
1888	Q80U63	97.1	109.604	101.765	96.4	82.5459	103.416	97.2475	92.473	88.7817	100.905	99.6199	114.944
1889	Q80U87	97.3	90.6307	87.7902	NA	NA	NA	103.455	103.405	109.18	NA	NA	NA
1890	Q80U95	125.7	79.1584	78.3171	NA	NA	NA	87.6262	91.1692	132.644	NA	NA	NA
1891	Q80UG2	97.8	91.6896	97.3571	97.9	97.7312	88.0954	108.214	100.798	94.4891	114.864	104.762	96.7372
1892	Q80UG5	107.2	85.9535	95.2937	89.9	85.5635	80.7997	102.213	100.396	100.196	120.03	118.374	107.041
1893	Q80UJ7	106.4	84.5416	83.8509	105.4	90.3332	71.7713	99.8339	98.892	119.644	134.54	110.308	91.3351
1894	Q80UM7	NA	NA	NA	80.4	79.2362	82.0765	NA	NA	NA	155.314	99.015	108.742
1895	Q80UP3	105.3	93.1899	90.2288	96.3	86.4395	86.3627	98.9028	97.6884	105.481	131.572	100.527	100.939
1896	Q80UP8	93.5	94.9548	92.1047	93.7	91.404	79.7054	103.558	107.016	99.3509	136.958	103.351	97.8376
1897	Q80UU9	99.4	93.1899	96.044	96.1	94.1295	76.0575	104.179	99.6944	97.8712	130.363	115.854	90.3347
1898	Q80UW0	107.6	85.0711	94.5433	NA	NA	NA	107.8	115.942	79.5864	NA	NA	NA
1899	Q80UW2	99	94.1606	97.0757	95.2	88.8731	83.1708	104.903	92.473	102.733	132.451	111.72	91.1351
1900	Q80V26	99	81.0999	92.5737	97.5	90.0412	88.6426	101.179	99.0926	120.278	110.138	103.956	109.542
1901	Q80V91	NA	NA	NA	105.2	81.2804	89.5545	NA	NA	NA	110.577	114.946	98.5379
1902	Q80VC9	99.9	89.0422	92.0109	90.6	87.413	77.2431	106.248	97.2872	107.066	151.577	97.9058	99.9384
1903	Q80VD1	95	88.1597	93.9806	NA	NA	NA	112.042	98.7917	103.684	NA	NA	NA
1904	Q80VP0	90.9	95.6608	90.6978	91.6	91.1119	86.1803	103.144	103.907	106.538	118.821	109.905	103.14
1905	Q80VP1	128.2	74.0401	81.8813	NA	NA	NA	94.2473	92.1721	124.294	NA	NA	NA
1906	Q80VP9	97.4	94.2488	92.5737	86.6	90.1385	66.6643	104.489	101.5	100.302	130.802	124.424	105.441
1907	Q80W04	95.3	91.8661	93.6054	86.3	79.9176	85.0859	104.386	104.408	101.253	149.488	119.584	83.6322
1908	Q80W47	108.1	91.7779	94.9185	98.2	93.1561	95.0263	96.1095	94.3787	105.375	110.577	87.0162	115.144
1909	Q80WC7	112.3	87.1008	90.2288	88	88.1917	86.8187	107.49	86.4553	108.546	129.483	97.6034	111.643
1910	Q80WG5	NA	NA	NA	98.1	83.9086	78.7022	NA	NA	NA	131.022	117.87	93.2359
1911	Q80WJ7	92.8	90.5424	88.353	NA	NA	NA	110.076	105.913	104.001	NA	NA	NA
1912	Q80WM4	96.5	91.6014	98.3888	92.2	89.0678	83.5356	103.972	98.9923	101.042	120.47	115.148	100.939
1913	Q80WQ2	99	92.3956	100.921	93.6	89.7492	86.4539	101.8	95.4819	100.514	118.602	107.586	104.74
1914	Q80WT0	86.8	91.7779	93.8868	NA	NA	NA	119.18	104.809	94.5947	NA	NA	NA
1915	Q80X50	82.3	84.9828	88.5406	NA	NA	NA	107.283	101.399	129.156	NA	NA	NA
1916	Q80X71	102.2	99.1025	96.2316	106.7	84.8821	78.155	98.9028	94.6795	98.294	115.194	127.852	88.8342
1917	Q80X80	93.9	90.5424	93.2302	72.5	87.6076	107.794	115.869	103.305	94.172	134.1	90.8477	107.141
1918	Q80XI3	114	87.4537	80.2868	NA	NA	NA	95.9026	91.9716	123.554	NA	NA	NA
1919	Q80XI4	111.5	83.2178	91.073	88.9	87.6076	91.0137	99.8339	103.305	103.156	116.073	107.787	108.842
1920	Q80XK6	118.5	84.1003	82.913	72.7	89.4571	78.4286	92.799	86.4553	128.733	160.37	110.913	93.536
1921	Q80XN0	NA	NA	NA	88.8	91.2093	96.0295	NA	NA	NA	129.044	98.0067	97.7376
1922	Q80XR2	95.5	94.6901	98.8578	95.7	97.0498	91.8344	102.731	101.7	96.2858	109.258	106.376	99.0381
1923	Q80Y17	96.1	102.015	103.829	76.1	98.7046	80.2525	105.317	74.8209	106.961	129.593	100.729	116.845
1924	Q80Y24	94.6	89.4835	94.9185	104.2	90.8199	72.6833	106.352	101.7	104.213	123.768	116.66	94.6364
1925	Q80Y55	93.3	93.5429	105.236	NA	NA	NA	102.006	90.8683	104.847	NA	NA	NA
1926	Q80Y98	NA	NA	NA	109.4	119.633	60.3718	NA	NA	NA	135.309	93.1668	86.0331
1927	Q80YA3	130	66.4507	93.2302	NA	NA	NA	93.937	101.299	109.392	NA	NA	NA
1928	Q80YA9	99.8	86.13	94.7309	100.8	91.8907	78.611	106.352	98.3905	106.432	130.583	103.855	96.9373
1929	Q80YE4	96.3	90.4542	94.0744	NA	NA	NA	110.904	95.9834	103.473	NA	NA	NA
1930	Q80YF9	94	90.1012	90.9792	NA	NA	NA	109.972	104.509	101.888	NA	NA	NA
1931	Q80YN3	90.9	86.3065	101.015	94.3	95.5897	97.671	107.179	112.432	92.9037	108.159	96.1917	106.741
1932	Q80YS6	87.3	101.926	98.0137	NA	NA	NA	102.524	98.6914	100.514	NA	NA	NA
1933	Q80YV4	113.9	82.9531	79.2551	NA	NA	NA	96.3164	96.7858	124.717	NA	NA	NA
1934	Q80YX1	111.2	96.8963	96.7943	NA	NA	NA	97.7648	94.7798	91.6354	NA	NA	NA
1935	Q80Z10	NA	NA	NA	99.4	98.0232	82.806	NA	NA	NA	109.588	126.945	83.5321
1936	Q80Z19	107.4	107.486	87.9778	NA	NA	NA	118.663	76.8268	90.5784	NA	NA	NA
1937	Q80Z24	91.3	92.3074	100.827	79.6	92.5721	94.4791	106.455	104.609	94.4891	128.274	107.787	98.0377
1938	Q80Z38	96.4	84.8946	93.324	NA	NA	NA	98.0752	94.2784	125.774	NA	NA	NA
1939	Q80ZA4	NA	NA	NA	93.5	82.2538	86.6363	NA	NA	NA	120.14	127.348	91.5352
1940	Q80ZI2	112.4	99.8085	85.164	NA	NA	NA	110.386	87.3579	95.0175	NA	NA	NA
1941	Q80ZJ1	95.8	91.9544	98.3888	126.3	95.2003	73.3216	106.455	101.399	96.3915	88.7038	119.483	96.237
1942	Q80ZJ7	103.3	89.1305	95.3875	105.6	94.5189	85.8155	104.593	87.9597	111.083	116.843	107.384	90.3347
1943	Q80ZJ8	42.8	56.214	40.7061	NA	NA	NA	185.288	217.643	57.0739	NA	NA	NA
1944	Q80ZS3	NA	NA	NA	93.1	88.8731	79.067	NA	NA	NA	128.934	117.467	95.1366
1945	Q80ZU4	100.7	96.102	78.4109	NA	NA	NA	110.904	86.9567	119.221	NA	NA	NA
1946	Q80ZW2	97.7	95.8373	99.9833	84.9	82.7405	91.5609	102.42	99.3935	94.0663	122.668	115.249	103.84
1947	Q810J8	107.9	83.2178	86.7585	83.8	98.7046	88.1866	110.49	88.06	117.002	148.06	102.242	82.1316
1948	Q810U3	95.6	86.483	99.8895	102	92.7668	83.1708	107.283	111.93	89.5215	122.668	106.476	94.3363
1949	Q810U4	97.4	92.0426	102.61	94	83.6166	90.1017	99.7304	99.8949	98.1883	126.735	109.098	97.7376
1950	Q811D0	109.8	91.2484	89.6661	96.8	83.6166	80.3437	97.5579	99.6944	103.05	143.993	107.182	91.9354
1951	Q811L6	95.1	81.5411	94.0744	NA	NA	NA	110.283	103.104	108.758	NA	NA	NA
1952	Q811P8	104.2	87.2773	90.4164	90.4	92.6694	73.504	104.179	96.9864	109.075	140.475	106.073	100.739
1953	Q811Q9	99.4	93.9841	86.9461	94.5	98.3152	83.718	103.455	99.7946	107.806	107.939	116.963	98.6379
1954	Q811S7	90.5	99.279	87.415	NA	NA	NA	106.972	94.6795	112.14	NA	NA	NA
1955	Q812A2	121.5	79.1584	83.6633	NA	NA	NA	96.213	94.8801	118.376	NA	NA	NA
1956	Q812A5	101.3	90.0129	85.9144	NA	NA	NA	117.732	88.1603	109.18	NA	NA	NA
1957	Q812E0	109.5	78.4525	89.2909	NA	NA	NA	110.283	92.473	113.619	NA	NA	NA
1958	Q8BFQ6	NA	NA	NA	59.4	53.246	52.2553	NA	NA	NA	307.99	88.6295	60.6233
1959	Q8BFQ8	122.8	84.7181	78.9737	NA	NA	NA	102.11	86.355	118.587	NA	NA	NA
1960	Q8BFR2	93.6	93.4546	88.8219	NA	NA	NA	108.524	85.9538	121.652	NA	NA	NA
1961	Q8BFR4	NA	NA	NA	94.1	86.5369	79.7054	NA	NA	NA	152.676	102.645	88.9342
1962	Q8BFR5	117.2	86.2183	89.3847	99.9	101.722	82.6236	98.9028	86.5556	114.042	117.612	107.787	91.035
1963	Q8BFT9	93.5	93.9841	96.7006	85.3	91.3066	85.3595	103.144	102.402	100.619	127.395	106.476	105.841
1964	Q8BFU8	89.4	89.5717	98.295	111	98.1206	64.1108	118.352	100.697	94.5947	150.588	90.5453	91.2351
1965	Q8BFX3	100.8	93.4546	95.2937	NA	NA	NA	96.213	99.8949	104.741	NA	NA	NA
1966	Q8BFY6	101.4	90.9837	91.7295	NA	NA	NA	100.558	103.606	102.733	NA	NA	NA
1967	Q8BFY9	112.6	81.5411	78.5985	NA	NA	NA	102.42	97.889	121.124	NA	NA	NA
1968	Q8BFZ3	78.8	86.13	112.176	NA	NA	NA	133.767	84.9508	95.2289	NA	NA	NA
1969	Q8BFZ9	90.6	88.7775	99.9833	83.5	95.2976	89.4633	104.903	109.624	96.8143	133.111	105.065	95.2366
1970	Q8BG21	96.1	104.486	90.7916	NA	NA	NA	89.4884	90.6677	118.164	NA	NA	NA
1971	Q8BG26	NA	NA	NA	82.6	84.6874	95.1175	NA	NA	NA	121.569	103.956	112.443
1972	Q8BG32	104.1	92.9251	107.956	86.7	90.8199	81.5293	100.351	86.5556	97.4484	93.9799	104.561	141.454
1973	Q8BG39	97	96.455	93.1364	101	97.4392	99.8597	99.5235	103.104	100.936	96.9477	101.032	100.939
1974	Q8BG40	119.6	89.1305	82.1626	NA	NA	NA	92.5921	85.0511	124.083	NA	NA	NA
1975	Q8BG51	NA	NA	NA	105.5	94.7136	72.7745	NA	NA	NA	123.987	120.895	84.7326
1976	Q8BG58	91.8	85.777	91.9171	NA	NA	NA	124.663	102.101	95.8631	NA	NA	NA
1977	Q8BG92	105.5	73.7753	83.2882	94.2	91.5013	74.416	127.87	98.7917	105.692	136.848	107.081	99.5383
1978	Q8BGA2	93.3	90.1894	98.1074	NA	NA	NA	104.903	100.396	104.107	NA	NA	NA
1979	Q8BGB5	92.9	88.0715	88.7282	NA	NA	NA	112.766	110.225	99.2452	NA	NA	NA
1980	Q8BGC4	114.4	82.7766	99.233	NA	NA	NA	87.9366	101.7	105.164	NA	NA	NA
1981	Q8BGD5	99.2	90.9837	95.3875	92	71.3516	89.5545	106.041	103.706	95.2289	126.626	106.476	115.644
1982	Q8BGD9	97	90.7189	101.39	84.3	83.3246	85.4507	109.248	99.9952	91.8467	135.419	121.702	92.4356
1983	Q8BGF8	88.8	95.0431	104.204	100.9	101.138	84.2652	106.145	97.1869	98.0826	106.73	109.703	96.9373
1984	Q8BGH2	NA	NA	NA	105.7	96.3684	86.6363	NA	NA	NA	112.996	105.972	92.3355
1985	Q8BGH4	96.9	89.2187	95.7626	101.6	84.4927	69.1266	109.041	100.396	99.668	146.081	107.182	96.6372
1986	Q8BGK5	96	95.3078	90.3226	70	60.7413	89.8281	96.4199	108.922	103.473	157.842	80.7648	145.456
1987	Q8BGK9	NA	NA	NA	96.7	97.8285	85.2683	NA	NA	NA	125.526	97.0992	99.0381
1988	Q8BGN3	95.2	88.601	94.4495	92.3	87.8023	90.2841	108.938	104.408	99.668	126.076	109.3	95.4367
1989	Q8BGN5	94.5	94.5136	98.764	79.9	101.333	89.5545	106.352	100.597	95.2289	108.489	112.526	107.441
1990	Q8BGN8	89.1	92.3074	102.141	85.4	96.2711	96.5766	108.007	100.697	97.9769	100.245	111.921	107.641
1991	Q8BGQ1	100.1	90.4542	92.3861	NA	NA	NA	105.42	97.7887	105.164	NA	NA	NA
1992	Q8BGQ7	99.8	87.7185	93.5116	103.9	120.801	82.6236	105.42	105.11	99.8794	80.1302	101.939	107.341
1993	Q8BGR6	109.1	87.1008	78.4109	NA	NA	NA	102.938	108.721	106.432	NA	NA	NA
1994	Q8BGT6	NA	NA	NA	78.4	78.1655	100.954	NA	NA	NA	147.51	81.4706	115.544
1995	Q8BGT8	149	77.8347	74.5654	NA	NA	NA	78.4187	84.8505	129.896	NA	NA	NA
1996	Q8BGU2	92	102.632	89.1971	NA	NA	NA	91.2471	107.818	106.644	NA	NA	NA
1997	Q8BGU5	101	93.8076	100.921	96.8	83.5193	82.1677	97.351	89.3639	107.595	139.156	107.888	93.7361
1998	Q8BGV8	95.6	88.0715	90.135	88.9	79.6256	71.4977	111.524	93.3757	113.619	154.325	106.275	105.24
[truncated: 1,581 more rows]

## Sheet: E1
Checked	Protein FDR Confidence: Combined	Master	Accession	Description	Exp. q-value: Combined	Sum PEP Score	Coverage [%]	# Peptides	# PSMs	# Unique Peptides	# Protein Groups	# AAs	MW [kDa]	calc. pI	Score Sequest HT: Sequest HT	# Peptides (by Search Engine): Sequest HT	# Razor Peptides	Abundance Ratio: (127N) / (126)	Abundance Ratio: (127C) / (126)	Abundance Ratio: (128N) / (126)	Abundance Ratio: (129N) / (126)	Abundance Ratio: (129C) / (126)	Abundance Ratio: (130N) / (126)	Abundance Ratio: (130C) / (126)	Abundance Ratio: (131) / (126)	Abundances (Grouped): 126	Abundances (Grouped): 127N	Abundances (Grouped): 127C	Abundances (Grouped): 128N	Abundances (Grouped): 129N	Abundances (Grouped): 129C	Abundances (Grouped): 130N	Abundances (Grouped): 130C	Abundances (Grouped): 131	Found in Sample: [S73] F9: 126, Sample	Found in Sample: [S74] F9: 127N, Sample	Found in Sample: [S75] F9: 127C, Sample	Found in Sample: [S76] F9: 128N, Sample	Found in Sample: [S77] F9: 129N, Sample	Found in Sample: [S78] F9: 129C, Sample	Found in Sample: [S79] F9: 130N, Sample	Found in Sample: [S80] F9: 130C, Sample	Found in Sample: [S81] F9: 131, Sample
FALSE	High	Master Protein	Q9JHU4	Cytoplasmic dynein 1 heavy chain 1 OS=Mus musculus OX=10090 GN=Dync1h1 PE=1 SV=2	0	1727.48	46	212	1186	211	1	4644	531.7	6.42	3861.43	212	1	1.339	1.4	1.617	1.411	1.52	1.374	1.354	1.453	72.2	96.7	101	116.7	101.8	109.7	99.2	97.8	104.9	High	High	High	High	High	High	High	High	High
FALSE	High	Master Protein	Q61879	Myosin-10 OS=Mus musculus OX=10090 GN=Myh10 PE=1 SV=2	0	1350.49	57	144	743	115	1	1976	228.9	5.54	2652.48	144	24	0.676	0.951	1.046	0.944	1.09	0.984	0.905	1.01	104.6	70.7	99.4	109.4	98.7	114	102.9	94.7	105.6	High	High	High	High	High	High	High	High	High
FALSE	High	Master Protein	Q8VDD5	Myosin-9 OS=Mus musculus OX=10090 GN=Myh9 PE=1 SV=4	0	1026.02	56	126	565	101	1	1960	226.2	5.66	2012.54	126	4	1.127	1.028	1.113	1.044	1.1	1.079	0.992	1.073	94.2	106.2	96.8	104.8	98.3	103.6	101.6	93.4	101.1	High	High	High	High	High	High	High	High	High
FALSE	High	Master Protein	Q6PIC6	Sodium/potassium-transporting ATPase subunit alpha-3 OS=Mus musculus OX=10090 GN=Atp1a3 PE=1 SV=1	0	842.131	55	62	841	38	1	1013	111.6	5.41	3105.63	62	24	0.554	1.394	1.262	1.331	1.23	1.347	1.475	1.291	82.7	45.8	115.2	104.3	110	101.7	111.4	121.9	106.8	High	High	High	High	High	High	High	High	High
FALSE	High	Master Protein	Q8BPN8	DmX-like protein 2 OS=Mus musculus OX=10090 GN=Dmxl2 PE=1 SV=3	0	830.487	35	90	530	87	1	3032	338	6.42	1863.88	90	1	0.427	1.511	1.064	1.491	1.061	1.333	1.535	1.108	85.5	36.5	129.1	90.9	127.4	90.7	114	131.2	94.7	High	High	High	High	High	High	High	High	High
FALSE	High	Master Protein	Q99104	Unconventional myosin-Va OS=Mus musculus OX=10090 GN=Myo5a PE=1 SV=2	0	754.512	46	96	511	95	1	1853	215.4	8.63	1785.99	96	1	0.536	0.796	0.767	0.819	0.794	0.816	0.805	0.758	126.9	68	101	97.4	103.9	100.7	103.6	102.1	96.2	High	High	High	High	High	High	High	High	High
FALSE	High	Master Protein	P16546	Spectrin alpha chain, non-erythrocytic 1 OS=Mus musculus OX=10090 GN=Sptan1 PE=1 SV=4	0	664.475	43	90	202	90	1	2472	284.4	5.33	744.83	90	0	0.243	0.471	0.439	0.471	0.458	0.454	0.438	0.426	204.6	49.6	96.4	89.8	96.4	93.8	92.8	89.6	87.1	High	High	High	High	High	High	High	High	High
FALSE	High	Master Protein	Q68FD5	Clathrin heavy chain 1 OS=Mus musculus OX=10090 GN=Cltc PE=1 SV=3	0	633.133	44	67	411	67	1	1675	191.4	5.69	1429.41	67	0	2.902	1.043	0.982	0.947	0.926	0.996	1.052	1.004	82.9	240.6	86.5	81.4	78.5	76.8	82.6	87.2	83.3	High	High	High	High	High	High	High	High	High
FALSE	High	Master Protein	P50516	V-type proton ATPase catalytic subunit A OS=Mus musculus OX=10090 GN=Atp6v1a PE=1 SV=2	0	596.992	69	43	964	43	1	617	68.3	5.58	3319.52	43	0	1.13	1.649	1.013	1.664	1.056	1.432	1.66	1.059	77.2	87.2	127.2	78.2	128.4	81.5	110.5	128.1	81.7	High	High	High	High	High	High	High	High	High
FALSE	High	Master Protein	Q8VDN2	Sodium/potassium-transporting ATPase subunit alpha-1 OS=Mus musculus OX=10090 GN=Atp1a1 PE=1 SV=1	0	595.31	47	48	506	27	1	1023	112.9	5.45	1902.39	48	0	0.251	1.234	1.135	1.244	1.235	1.218	1.306	1.203	91.6	23	113	104	114	113.2	111.5	119.6	110.2	High	High	High	High	High	High	High	High	High
FALSE	High	Master Protein	Q6PIE5	Sodium/potassium-transporting ATPase subunit alpha-2 OS=Mus musculus OX=10090 GN=Atp1a2 PE=1 SV=1	0	590.157	48	49	498	26	1	1020	112.1	5.55	1856.74	49	1	0.703	1.218	1.176	1.183	1.267	1.169	1.281	1.207	88.2	62	107.4	103.8	104.3	111.7	103.1	112.9	106.5	High	High	High	High	High	High	High	High	High
FALSE	High	Master Protein	Q9QYR6	Microtubule-associated protein 1A OS=Mus musculus OX=10090 GN=Map1a PE=1 SV=2	0	583.304	38	82	259	80	1	2776	300	5	930.65	82	2	0.704	0.436	0.617	0.439	0.659	0.521	0.427	0.585	167	117.5	72.9	103.1	73.3	110	87.1	71.3	97.7	High	High	High	High	High	High	High	High	High
FALSE	High	Master Protein	Q9DBG3	AP-2 complex subunit beta OS=Mus musculus OX=10090 GN=Ap2b1 PE=1 SV=1	0	516.565	51	54	374	28	1	937	104.5	5.38	1389.87	54	23	0.173	0.936	0.717	0.924	0.692	0.951	0.934	0.706	128	22.1	119.8	91.7	118.2	88.5	121.8	119.6	90.3	High	High	High	High	High	High	High	High	High
FALSE	High	Master Protein	O88737	Protein bassoon OS=Mus musculus OX=10090 GN=Bsn PE=1 SV=4	0	507.829	32	80	155	78	1	3942	418.6	7.71	499.13	80	1	0.512	0.821	0.789	0.806	0.832	0.912	0.784	0.817	123.7	63.4	101.6	97.6	99.7	103	112.9	97	101.2	High	High	High	High	High	High	High	High	High
FALSE	High	Master Protein	P17426	AP-2 complex subunit alpha-1 OS=Mus musculus OX=10090 GN=Ap2a1 PE=1 SV=1	0	499.624	62	56	424	37	1	977	107.6	7.03	1449.33	56	16	0.43	0.941	0.715	0.921	0.696	0.948	0.924	0.698	123.7	53.3	116.5	88.5	114	86.1	117.3	114.3	86.3	High	High	High	High	High	High	High	High	High
FALSE	High	Master Protein	Q7TMM9	Tubulin beta-2A chain OS=Mus musculus OX=10090 GN=Tubb2a PE=1 SV=1	0	490.044	82	27	766	3	1	445	49.9	4.89	2621.09	27	8	0.773	1.259	1.882	1.345	1.988	1.293	1.287	1.884	70.8	54.8	89.2	133.3	95.2	140.8	91.5	91.1	133.4	High	High	High	High	High	High	High	High	High
FALSE	High	Master Protein	P46460	Vesicle-fusing ATPase OS=Mus musculus OX=10090 GN=Nsf PE=1 SV=2	0	481.339	53	54	520	54	1	744	82.6	6.95	1760.47	54	0	0.316	1.439	1.271	1.452	1.279	1.381	1.454	1.267	82.9	26.2	119.3	105.3	120.3	106	114.5	120.5	105	High	High	High	High	High	High	High	High	High
FALSE	High	Master Protein	P68372	Tubulin beta-4B chain OS=Mus musculus OX=10090 GN=Tubb4b PE=1 SV=1	0	479.801	82	27	780	1	1	445	49.8	4.89	2646.99	27	36	1.116	1.295	1.913	1.352	1.958	1.342	1.286	1.879	68.5	76.4	88.7	131	92.6	134.1	91.9	88.1	128.7	High	High	High	High	High	High	High	High	High
FALSE	High	Master Protein	Q9CWF2	Tubulin beta-2B chain OS=Mus musculus OX=10090 GN=Tubb2b PE=1 SV=1	0	474.256	82	26	731	1	1	445	49.9	4.89	2471.9	26	0	0.01	1.533	2.164	1.624	2.013	1.561	1.532	1.927	67.4		103.3	145.9	109.5	135.7	105.2	103.2	129.9	High	Not Found	High	High	High	High	High	High	High
FALSE	High	Master Protein	P62814	V-type proton ATPase subunit B, brain isoform OS=Mus musculus OX=10090 GN=Atp6v1b2 PE=1 SV=1	0	467.334	74	31	588	31	1	511	56.5	5.81	2076.74	31	0	1.1	1.378	0.965	1.405	1.012	1.287	1.355	1.057	85.2	93.7	117.5	82.2	119.8	86.2	109.7	115.5	90.1	High	High	High	High	High	High	High	High	High
FALSE	High	Master Protein	Q9D6F9	Tubulin beta-4A chain OS=Mus musculus OX=10090 GN=Tubb4a PE=1 SV=3	0	445.942	83	26	688	6	1	444	49.6	4.88	2325.06	26	0	6.264	1.354	1.905	1.436	1.859	1.291	1.32	1.856	49.2	308.3	66.6	93.8	70.7	91.5	63.6	65	91.4	High	High	High	High	High	High	High	High	High
FALSE	High	Master Protein	P39053	Dynamin-1 OS=Mus musculus OX=10090 GN=Dnm1 PE=1 SV=2	0	444.175	60	51	366	37	1	867	97.7	7.74	1328.66	51	14	0.546	1.097	0.96	1.13	0.973	1.114	1.158	1.039	99.8	54.5	109.5	95.8	112.8	97.1	111.2	115.6	103.7	High	High	High	High	High	High	High	High	High
FALSE	High	Master Protein	Q920I9	WD repeat-containing protein 7 OS=Mus musculus OX=10090 GN=Wdr7 PE=1 SV=3	0	443.695	30	48	272	48	1	1489	163.3	6.9	983.18	48	0	0.222	1.325	1.038	1.346	1.063	1.211	1.369	1.104	93	20.6	123.2	96.5	125.2	98.9	112.6	127.3	102.7	High	High	High	High	High	High	High	High	High
FALSE	High	Master Protein	P68369	Tubulin alpha-1A chain OS=Mus musculus OX=10090 GN=Tuba1a PE=1 SV=1	0	440.535	69	29	713	8	1	451	50.1	5.06	2976.45	29	25	1.965	1.404	2.173	1.36	2.083	1.395	1.334	2.013	61.1	120.1	85.8	132.8	83.1	127.3	85.3	81.5	123	High	High	High	High	High	High	High	High	High
FALSE	High	Master Protein	P60710	Actin, cytoplasmic 1 OS=Mus musculus OX=10090 GN=Actb PE=1 SV=1	0	431.506	63	27	771	11	1	375	41.7	5.48	2898.52	27	18	4.337	1.1	1.596	1.072	1.65	1.123	1.072	1.612	61.8	268.1	68	98.6	66.3	102	69.4	66.3	99.6	High	High	High	High	High	High	High	High	High
FALSE	High	Master Protein	O08599	Syntaxin-binding protein 1 OS=Mus musculus OX=10090 GN=Stxbp1 PE=1 SV=2	0	428.961	60	41	328	41	1	594	67.5	6.96	1024.08	41	0	0.975	1.2	0.968	1.198	0.964	1.093	1.24	1.007	93.3	91	112	90.3	111.8	90	102	115.7	93.9	High	High	High	High	High	High	High	High	High
FALSE	High	Master Protein	Q6URW6	Myosin-14 OS=Mus musculus OX=10090 GN=Myh14 PE=1 SV=1	0	426.886	36	61	196	49	1	2000	228.4	5.55	613.94	61	0	0.237	0.776	0.867	0.806	0.943	0.781	0.736	0.874	128.2	30.3	99.5	111.1	103.4	120.9	100.1	94.4	112	High	High	High	High	High	High	High	High	High
FALSE	High	Master Protein	P99024	Tubulin beta-5 chain OS=Mus musculus OX=10090 GN=Tubb5 PE=1 SV=1	0	423.564	78	25	716	3	1	444	49.6	4.89	2409.42	25	0	0.894	1.311	1.849	1.417	2.041	1.322	1.326	1.955	68.6	61.3	90	126.9	97.2	140.1	90.7	91	134.2	High	High	High	High	High	High	High	High	High
FALSE	High	Master Protein	P28652	Calcium/calmodulin-dependent protein kinase type II subunit beta OS=Mus musculus OX=10090 GN=Camk2b PE=1 SV=2	0	417.837	64	31	545	17	1	542	60.4	7.28	1875.93	31	6	0.676	0.912	1.234	0.928	1.34	0.984	0.912	1.238	97.6	65.9	89	120.4	90.6	130.8	96	89	120.8	High	High	High	High	High	High	High	High	High
FALSE	High	Master Protein	P68368	Tubulin alpha-4A chain OS=Mus musculus OX=10090 GN=Tuba4a PE=1 SV=1	0	414.443	63	26	613	5	1	448	49.9	5.06	2526.55	26	1	2.487	1.258	2.272	1.174	2.369	1.373	1.29	2.257	58.1	144.6	73.2	132.1	68.2	137.7	79.8	75	131.2	High	High	High	High	High	High	High	High	High
FALSE	High	Master Protein	Q9ERD7	Tubulin beta-3 chain OS=Mus musculus OX=10090 GN=Tubb3 PE=1 SV=1	0	409.189	74	25	567	11	1	450	50.4	4.93	1839.23	25	1	0.128	1.156	1.633	1.217	1.705	1.213	1.129	1.663	83	10.7	95.9	135.5	101	141.5	100.7	93.7	138	High	High	High	High	High	High	High	High	High
FALSE	High	Master Protein	Q9JMH9	Unconventional myosin-XVIIIa OS=Mus musculus OX=10090 GN=Myo18a PE=1 SV=2	0	408.629	33	56	144	55	1	2050	232.6	6.28	485.55	56	0	0.466	0.925	1.018	1.001	1.077	0.97	0.876	0.987	108.2	50.4	100.1	110.2	108.3	116.5	105	94.8	106.7	High	High	High	High	High	High	High	High	High
FALSE	High	Master Protein	P17427	AP-2 complex subunit alpha-2 OS=Mus musculus OX=10090 GN=Ap2a2 PE=1 SV=2	0	398.223	49	49	435	30	1	938	104	6.93	1287.22	49	0	0.351	1.001	0.735	0.983	0.734	0.95	0.969	0.73	120.7	42.4	120.9	88.8	118.7	88.6	114.7	117.1	88.1	High	High	High	High	High	High	High	High	High
FALSE	High	Master Protein	Q9Z1G4	V-type proton ATPase 116 kDa subunit a isoform 1 OS=Mus musculus OX=10090 GN=Atp6v0a1 PE=1 SV=3	0	394.652	32	31	453	31	1	839	96.4	6.76	1651.11	31	0	1.963	1.22	0.825	1.226	0.813	1.121	1.23	0.832	88	172.7	107.4	72.6	107.8	71.6	98.6	108.2	73.2	High	High	High	High	High	High	High	High	High
FALSE	High	Master Protein	P20357	Microtubule-associated protein 2 OS=Mus musculus OX=10090 GN=Map2 PE=1 SV=2	0	391.058	37	55	191	55	1	1828	199	4.91	672.39	55	0	0.279	0.288	0.264	0.276	0.309	0.296	0.271	0.298	274.3	76.6	79.1	72.3	75.6	84.8	81.2	74.4	81.8	High	High	High	High	High	High	High	High	High
FALSE	High	Master Protein	P19096	Fatty acid synthase OS=Mus musculus OX=10090 GN=Fasn PE=1 SV=2	0	385.313	26	53	155	53	1	2504	272.3	6.58	514.35	53	0	0.358	1.327	1.662	1.396	1.698	1.33	1.294	1.592	77.2	27.7	102.5	128.3	107.7	131.1	102.7	99.9	122.9	High	High	High	High	High	High	High	High	High
FALSE	High	Master Protein	P11798	Calcium/calmodulin-dependent protein kinase type II subunit alpha OS=Mus musculus OX=10090 GN=Camk2a PE=1 SV=2	0	383.42	59	33	754	20	1	478	54.1	7.08	2561.11	33	14	1.982	1.266	1.734	1.249	1.748	1.317	1.285	1.692	67.8	134.4	85.8	117.5	84.7	118.6	89.3	87.1	114.7	High	High	High	High	High	High	High	High	High
FALSE	High	Master Protein	P01865	Ig gamma-2A chain C region, membrane-bound form OS=Mus musculus OX=10090 GN=Igh-1a PE=1 SV=3	0	383.159	41	17	997	13	1	398	43.9	6.29	3647.28	17	3	2.278	7.221	3.145	8.427	2.997	1.032	8.756	3.043	23.7	54.1	171.5	74.7	200.1	71.2	24.5	207.9	72.3	High	High	High	High	High	High	High	High	High
FALSE	High	Master Protein	P14873	Microtubule-associated protein 1B OS=Mus musculus OX=10090 GN=Map1b PE=1 SV=2	0	380.556	28	53	124	51	1	2464	270.1	4.83	406.44	53	0	0.568	0.502	0.607	0.507	0.634	0.513	0.469	0.582	167.2	95	83.9	101.5	84.9	106.1	85.7	78.4	97.3	High	High	High	High	High	High	High	High	High
FALSE	High	Master Protein	O35643	AP-1 complex subunit beta-1 OS=Mus musculus OX=10090 GN=Ap1b1 PE=1 SV=2	0	373.012	43	42	238	16	1	943	103.9	5.17	808.31	42	0	1.291	1.059	0.869	1.125	0.892	1.098	1.119	0.836	96.9	125.1	102.6	84.2	109	86.4	106.4	108.4	81	High	High	High	High	High	High	High	High	High
FALSE	High	Master Protein	Q8CHC4	Synaptojanin-1 OS=Mus musculus OX=10090 GN=Synj1 PE=1 SV=3	0	367.835	36	43	196	43	1	1574	172.5	6.89	691.08	43	0	0.524	1.526	1.364	1.526	1.33	1.589	1.611	1.417	75.7	39.7	115.5	103.2	115.5	100.7	120.3	122	107.3	High	High	High	High	High	High	High	High	High
FALSE	High	Master Protein	P16858	Glyceraldehyde-3-phosphate dehydrogenase OS=Mus musculus OX=10090 GN=Gapdh PE=1 SV=2	0	365.309	63	23	536	22	1	333	35.8	8.25	1955.63	23	1	0.896	1.619	1.967	1.707	1.6	1.672	1.651	1.829	64.6	57.9	104.5	127	110.2	103.3	107.9	106.6	118.1	High	High	High	High	High	High	High	High	High
FALSE	High	Master Protein	P63318	Protein kinase C gamma type OS=Mus musculus OX=10090 GN=Prkcg PE=1 SV=1	0	351.967	55	40	297	37	1	697	78.3	7.46	936.16	40	4	0.517	1.577	1.223	1.609	1.219	1.557	1.629	1.277	77.5	40.1	122.3	94.8	124.8	94.5	120.7	126.3	99	High	High	High	High	High	High	High	High	High
FALSE	High	Master Protein	O55143	Sarcoplasmic/endoplasmic reticulum calcium ATPase 2 OS=Mus musculus OX=10090 GN=Atp2a2 PE=1 SV=2	0	350.184	41	40	148	32	1	1044	114.8	5.34	518.48	40	5	0.953	0.74	0.714	0.753	0.733	0.765	0.737	0.681	127.2	121.2	94.1	90.8	95.7	93.2	97.4	93.8	86.6	High	High	High	High	High	High	High	High	High
FALSE	High	Master Protein	Q62261	Spectrin beta chain, non-erythrocytic 1 OS=Mus musculus OX=10090 GN=Sptbn1 PE=1 SV=2	0	344.267	27	55	123	55	1	2363	274.1	5.58	396.73	55	0	0.622	0.455	0.453	0.47	0.498	0.457	0.431	0.463	185.6	115.5	84.4	84.1	87.3	92.5	84.9	79.9	85.8	High	High	High	High	High	High	High	High	High
FALSE	High	Master Protein	Q64332	Synapsin-2 OS=Mus musculus OX=10090 GN=Syn2 PE=1 SV=2	0	339.431	55	26	232	22	1	586	63.3	8.43	856.2	26	1	1.627	1.714	1.508	1.712	1.306	1.592	1.741	1.422	66.1	107.5	113.2	99.6	113.1	86.3	105.2	115	94	High	High	High	High	High	High	High	High	High
FALSE	High	Master Protein	Q9QXS1	Plectin OS=Mus musculus OX=10090 GN=Plec PE=1 SV=3	0	338.511	18	73	121	73	1	4691	533.9	5.96	358.61	73	0	0.435	0.726	0.757	0.741	0.815	0.703	0.619	0.828	135.9	59.1	98.7	102.8	100.6	110.8	95.6	84.1	112.5	High	High	High	High	High	High	High	High	High
FALSE	High	Master Protein	Q91XV3	Brain acid soluble protein 1 OS=Mus musculus OX=10090 GN=Basp1 PE=1 SV=3	0	337.97	93	23	127	23	1	226	22.1	4.51	601.5	23	0	0.63	1.504	1.335	1.413	1.227	1.403	1.575	1.164	80	50.4	120.3	106.8	113	98.2	112.2	126	93.1	High	High	High	High	High	High	High	High	High
FALSE	High	Master Protein	P01868	Ig gamma-1 chain C region secreted form OS=Mus musculus OX=10090 GN=Ighg1 PE=1 SV=1	0	329.489	57	17	943	17	1	324	35.7	7.4	3978.44	17	0	9.842	0.869	9.937	0.807	10.7	0.913	0.814	9.434	20.3	199.9	17.7	201.8	16.4	217.3	18.5	16.5	191.6	High	High	High	High	High	High	High	High	High
FALSE	High	Master Protein	Q7TSJ2	Microtubule-associated protein 6 OS=Mus musculus OX=10090 GN=Map6 PE=1 SV=2	0	321.907	54	41	132	41	1	906	96.4	9.5	478.16	41	0	0.59	0.485	0.502	0.487	0.536	0.489	0.479	0.504	177.5	104.6	86	89.1	86.4	95.1	86.8	85	89.4	High	High	High	High	High	High	High	High	High
FALSE	High	Master Protein	P63017	Heat shock cognate 71 kDa protein OS=Mus musculus OX=10090 GN=Hspa8 PE=1 SV=1	0	319.555	57	34	290	21	1	646	70.8	5.52	1014.61	34	12	0.806	1.007	1.095	0.927	0.994	1.021	0.966	1.101	100.9	81.4	101.6	110.5	93.5	100.3	103	97.5	111.1	High	High	High	High	High	High	High	High	High
FALSE	High	Master Protein	P46096	Synaptotagmin-1 OS=Mus musculus OX=10090 GN=Syt1 PE=1 SV=1	0	319.402	52	27	470	18	1	421	47.4	8.53	1485.76	27	10	0.176	1.402	0.891	1.356	0.844	1.142	1.356	0.918	99.1	17.5	138.9	88.2	134.4	83.6	113.1	134.3	90.9	High	High	High	High	High	High	High	High	High
FALSE	High	Master Protein	P03987	Ig gamma-3 chain C region OS=Mus musculus OX=10090 PE=1 SV=2	0	317.252	56	19	953	17	1	398	43.9	7.14	3452.36	19	2	1.1	0.074	0.075	0.066	0.096	0.676	0.059	0.079	279	306.9	20.8	20.9	18.4	26.9	188.5	16.5	22.1	High	High	High	High	High	High	High	High	High
FALSE	High	Master Protein	Q8BYI9	Tenascin-R OS=Mus musculus OX=10090 GN=Tnr PE=1 SV=2	0	314.702	33	32	157	32	1	1358	149.5	4.94	566.54	32	0	0.185	0.748	0.769	0.71	0.733	0.749	0.718	0.719	142.2	26.2	106.3	109.3	100.9	104.2	106.5	102.1	102.2	High	High	High	High	High	High	High	High	High
FALSE	High	Master Protein	O88935	Synapsin-1 OS=Mus musculus OX=10090 GN=Syn1 PE=1 SV=2	0	314.026	59	27	258	24	1	706	74.1	9.8	934.43	27	4	0.424	1.305	1.252	1.122	0.99	1.156	1.278	1.292	91.7	38.9	119.6	114.8	102.9	90.7	105.9	117.2	118.4	High	High	High	High	High	High	High	High	High
FALSE	High	Master Protein	P47857	ATP-dependent 6-phosphofructokinase, muscle type OS=Mus musculus OX=10090 GN=Pfkm PE=1 SV=3	0	310.743	47	35	174	30	1	780	85.2	8	638	35	5	2.416	0.815	0.887	0.798	0.86	0.853	0.779	0.828	97.4	235.4	79.5	86.4	77.8	83.8	83.1	75.9	80.7	High	High	High	High	High	High	High	High	High
FALSE	High	Master Protein	O08788	Dynactin subunit 1 OS=Mus musculus OX=10090 GN=Dctn1 PE=1 SV=3	0	307.996	40	44	96	44	1	1281	141.6	5.9	351.94	44	0	0.987	1.01	1.13	1.031	1.156	1.038	0.956	1.108	95.6	94.3	96.5	108	98.6	110.5	99.3	91.3	105.9	High	High	High	High	High	High	High	High	High
FALSE	High	Master Protein	O08553	Dihydropyrimidinase-related protein 2 OS=Mus musculus OX=10090 GN=Dpysl2 PE=1 SV=2	0	302.158	56	25	195	19	1	572	62.2	6.38	807.92	25	6	0.738	1.759	1.41	1.946	1.559	1.328	1.832	1.486	68.9	50.8	121.2	97.2	134.1	107.4	91.6	126.3	102.4	High	High	High	High	High	High	High	High	High
FALSE	High	Master Protein	Q9QWI6	SRC kinase signaling inhibitor 1 OS=Mus musculus OX=10090 GN=Srcin1 PE=1 SV=2	0	300.716	35	39	118	39	1	1250	134.8	9.32	432.71	39	0	0.45	0.858	0.901	0.931	1.003	0.885	0.885	0.946	114.5	51.5	98.3	103.1	106.6	114.9	101.3	101.3	108.3	High	High	High	High	High	High	High	High	High
FALSE	High	Master Protein	Q9WUA3	ATP-dependent 6-phosphofructokinase, platelet type OS=Mus musculus OX=10090 GN=Pfkp PE=1 SV=1	0	287.579	43	34	143	29	1	784	85.4	7.11	538.48	34	2	0.708	1.224	1.448	1.265	1.426	1.275	1.207	1.397	82.2	58.2	100.6	119	104	117.2	104.8	99.3	114.8	High	High	High	High	High	High	High	High	High
FALSE	High	Master Protein	Q9R0K7	Plasma membrane calcium-transporting ATPase 2 OS=Mus musculus OX=10090 GN=Atp2b2 PE=1 SV=2	0	286.31	31	38	119	24	1	1198	132.5	5.96	478.57	38	8	0.379	1.219	1.194	1.142	1.143	1.231	1.328	1.242	91.1	34.5	111.1	108.8	104	104.1	112.1	121	113.1	High	High	High	High	High	High	High	High	High
FALSE	High	Master Protein	P60879	Synaptosomal-associated protein 25 OS=Mus musculus OX=10090 GN=Snap25 PE=1 SV=1	0	283.483	81	23	148	23	1	206	23.3	4.77	582.04	23	0	0.68	1.19	0.969	1.095	0.993	1.116	1.134	0.995	98.1	66.7	116.8	95.1	107.4	97.4	109.5	111.3	97.6	High	High	High	High	High	High	High	High	High
FALSE	High	Master Protein	P13595	Neural cell adhesion molecule 1 OS=Mus musculus OX=10090 GN=Ncam1 PE=1 SV=3	0	277.392	39	30	208	30	1	1115	119.4	4.83	791.66	30	0	0.612	0.748	0.772	0.771	0.804	1.022	0.797	0.81	122.7	75.1	91.8	94.7	94.6	98.6	125.3	97.8	99.4	High	High	High	High	High	High	High	High	High
FALSE	High	Master Protein	Q8BVE3	V-type proton ATPase subunit H OS=Mus musculus OX=10090 GN=Atp6v1h PE=1 SV=1	0	276.905	48	21	190	21	1	483	55.8	6.61	709.78	21	0	0.4	1.689	1.047	1.708	1.069	1.477	1.723	1.073	80.5	32.2	135.9	84.2	137.4	86	118.8	138.6	86.4	High	High	High	High	High	High	High	High	High
FALSE	High	Master Protein	P50518	V-type proton ATPase subunit E 1 OS=Mus musculus OX=10090 GN=Atp6v1e1 PE=1 SV=2	0	272.704	76	26	343	26	1	226	26.1	8.43	1017.15	26	0	0.246	1.718	1.116	1.765	1.184	1.49	1.741	1.212	78.4	19.3	134.8	87.5	138.5	92.9	116.9	136.6	95	High	High	High	High	High	High	High	High	High
FALSE	High	Master Protein	P84091	AP-2 complex subunit mu OS=Mus musculus OX=10090 GN=Ap2m1 PE=1 SV=1	0	264.556	60	31	366	31	1	435	49.6	9.54	1181.25	31	0	0.213	0.972	0.758	0.937	0.679	0.993	0.966	0.756	123.7	26.3	120.2	93.8	115.9	84	122.9	119.5	93.6	High	High	High	High	High	High	High	High	High
FALSE	High	Master Protein	O54774	AP-3 complex subunit delta-1 OS=Mus musculus OX=10090 GN=Ap3d1 PE=1 SV=1	0	263.348	27	26	94	26	1	1199	135	7.37	378.36	26	0	0.413	1.047	1.005	1.048	0.976	1.064	1.007	0.883	106.6	44	111.6	107.1	111.8	104.1	113.4	107.3	94.1	High	High	High	High	High	High	High	High	High
FALSE	High	Master Protein	P12960	Contactin-1 OS=Mus musculus OX=10090 GN=Cntn1 PE=1 SV=1	0	261.106	40	34	131	33	1	1020	113.3	6.16	427.32	34	1	1.071	1.014	0.968	1.045	1.043	0.995	1.014	1.021	98.2	105.1	99.5	95	102.6	102.3	97.6	99.5	100.2	High	High	High	High	High	High	High	High	High
FALSE	High	Master Protein	P70704	Phospholipid-transporting ATPase IA OS=Mus musculus OX=10090 GN=Atp8a1 PE=1 SV=2	0	260.525	32	36	176	35	1	1164	131.3	6.84	604.75	36	1	0.229	1.342	1.009	1.337	1.044	1.203	1.328	1.014	94.7	21.7	127	95.5	126.6	98.8	113.9	125.7	96	High	High	High	High	High	High	High	High	High
FALSE	High	Master Protein	Q9JIS5	Synaptic vesicle glycoprotein 2A OS=Mus musculus OX=10090 GN=Sv2a PE=1 SV=1	0	259.206	33	24	448	23	1	742	82.6	5.57	1743.75	24	1	0.309	1.113	0.748	1.014	0.7	1.003	1.021	0.76	117.4	36.2	130.6	87.8	119.1	82.2	117.8	119.9	89.2	High	High	High	High	High	High	High	High	High
FALSE	High	Master Protein	Q923T9	Calcium/calmodulin-dependent protein kinase type II subunit gamma OS=Mus musculus OX=10090 GN=Camk2g PE=1 SV=1	0	256.828	45	26	312	12	1	529	59.6	7.58	1004.18	26	0	1.004	0.901	1.22	0.986	1.283	0.96	0.9	1.16	95.6	96	86.2	116.6	94.2	122.7	91.8	86.1	110.9	High	High	High	High	High	High	High	High	High
FALSE	High	Master Protein	P61264	Syntaxin-1B OS=Mus musculus OX=10090 GN=Stx1b PE=1 SV=1	0	254.111	72	26	251	22	1	288	33.2	5.38	851.42	26	1	1.968	1.259	1.02	1.304	1.096	1.209	1.332	1.117	79.6	156.7	100.2	81.2	103.8	87.2	96.2	106	88.9	High	High	High	High	High	High	High	High	High
FALSE	High	Master Protein	P46097	Synaptotagmin-2 OS=Mus musculus OX=10090 GN=Syt2 PE=1 SV=1	0	253.406	42	20	231	12	1	422	47.2	7.99	800.19	20	0	0.954	0.928	0.698	0.892	0.679	1.008	0.935	0.697	115.5	110.2	107.2	80.7	103	78.4	116.5	108	80.5	High	High	High	High	High	High	High	High	High
FALSE	High	Master Protein	P01867	Ig gamma-2B chain C region OS=Mus musculus OX=10090 GN=Igh-3 PE=1 SV=3	0	253.247	38	17	307	16	1	404	44.2	6.52	1229.42	17	0	5.179	0.674	3.728	0.608	3.515	0.747	0.638	3.342	46.3	239.9	31.2	172.7	28.1	162.8	34.6	29.5	154.8	High	High	High	High	High	High	High	High	High
FALSE	High	Master Protein	P01837	Immunoglobulin kappa constant OS=Mus musculus OX=10090 GN=Igkc PE=1 SV=2	0	250.818	100	12	847	12	1	107	11.9	5.9	3404.1	12	0	1.226	0.499	0.982	0.441	0.851	0.693	0.496	0.829	128.3	157.3	64	125.9	56.6	109.1	88.8	63.7	106.3	High	High	High	High	High	High	High	High	High
FALSE	High	Master Protein	Q8R0S2	IQ motif and SEC7 domain-containing protein 1 OS=Mus musculus OX=10090 GN=Iqsec1 PE=1 SV=2	0	250.441	42	33	103	29	1	961	107.9	7.14	336.7	33	3	0.248	1.097	1.166	1.196	1.227	1.18	1.097	1.178	95.9	23.7	105.2	111.8	114.6	117.6	113.1	105.2	112.9	High	High	High	High	High	High	High	High	High
FALSE	High	Master Protein	Q8BRT1	CLIP-associating protein 2 OS=Mus musculus OX=10090 GN=Clasp2 PE=1 SV=1	0	247.257	37	34	84	32	1	1286	140.7	8.63	264.37	34	1	0.43	0.725	0.744	0.731	0.773	0.759	0.685	0.764	136.1	58.5	98.7	101.3	99.6	105.2	103.4	93.3	104	High	High	High	High	High	High	High	High	High
FALSE	High	Master Protein	Q6ZPE2	Myotubularin-related protein 5 OS=Mus musculus OX=10090 GN=Sbf1 PE=1 SV=2	0	245.724	29	38	88	38	1	1867	208.6	7.12	291.41	38	0	2.383	0.872	0.829	0.939	0.908	0.92	0.863	0.879	93.8	223.6	81.8	77.8	88.1	85.2	86.4	81	82.4	High	High	High	High	High	High	High	High	High
FALSE	High	Master Protein	Q91V92	ATP-citrate synthase OS=Mus musculus OX=10090 GN=Acly PE=1 SV=1	0	244.599	39	38	112	38	1	1091	119.7	7.44	341.89	38	0	0.318	1.263	1.334	1.251	1.356	1.278	1.227	1.284	87.3	27.8	110.2	116.5	109.2	118.4	111.5	107.1	112.1	High	High	High	High	High	High	High	High	High
FALSE	High	Master Protein	P14094	Sodium/potassium-transporting ATPase subunit beta-1 OS=Mus musculus OX=10090 GN=Atp1b1 PE=1 SV=1	0	243.845	42	21	206	21	1	304	35.2	8.65	758.05	21	0	1.485	1.363	1.251	1.312	1.28	1.296	1.43	1.383	76.3	113.3	104	95.4	100.1	97.6	98.8	109.1	105.5	High	High	High	High	High	High	High	High	High
FALSE	High	Master Protein	G5E829	Plasma membrane calcium-transporting ATPase 1 OS=Mus musculus OX=10090 GN=Atp2b1 PE=1 SV=1	0	243.49	25	30	100	14	1	1220	134.7	5.91	346.68	30	1	0.128	1.129	1.106	1.146	1.242	1.126	1.184	1.184	97.4	12.4	109.9	107.7	111.6	120.9	109.6	115.3	115.2	High	High	High	High	High	High	High	High	High
FALSE	High	Master Protein	Q3UHJ0	AP2-associated protein kinase 1 OS=Mus musculus OX=10090 GN=Aak1 PE=1 SV=2	0	241.338	40	24	90	24	1	959	103.3	6.7	347.37	24	0	0.451	0.928	0.945	1.089	0.919	1.038	0.986	0.976	108	48.7	100.2	102.1	117.7	99.2	112.1	106.5	105.4	High	High	High	High	High	High	High	High	High
FALSE	High	Master Protein	Q9JJZ2	Tubulin alpha-8 chain OS=Mus musculus OX=10090 GN=Tuba8 PE=1 SV=1	0	239.69	40	17	338	2	1	449	50	5.1	1396.3	17	0																		High	Not Found	High	High	High	High	High	High	High
FALSE	High	Master Protein	Q91ZX7	Prolow-density lipoprotein receptor-related protein 1 OS=Mus musculus OX=10090 GN=Lrp1 PE=1 SV=1	0	239.545	13	42	72	41	1	4545	504.4	5.36	208.65	42	1	0.681	1.025	0.842	1.003	0.912	1.001	0.977	0.899	107.9	73.5	110.6	90.8	108.2	98.5	108	105.5	97	High	High	High	High	High	High	High	High	High
FALSE	High	Master Protein	O08539	Myc box-dependent-interacting protein 1 OS=Mus musculus OX=10090 GN=Bin1 PE=1 SV=1	0	238.111	46	24	115	22	1	588	64.4	5.03	425.49	24	0	0.578	1.527	1.24	1.596	1.291	1.589	1.607	1.354	76.4	44.1	116.6	94.7	121.9	98.6	121.4	122.8	103.5	High	High	High	High	High	High	High	High	High
FALSE	High	Master Protein	Q60902	Epidermal growth factor receptor substrate 15-like 1 OS=Mus musculus OX=10090 GN=Eps15l1 PE=1 SV=3	0	237.343	38	30	104	30	1	907	99.2	5.02	353.53	30	0	0.515	0.958	0.816	0.997	0.894	0.999	0.985	0.906	111.5	57.4	106.9	91	111.2	99.7	111.4	109.8	101.1	High	High	High	High	High	High	High	High	High
FALSE	High	Master Protein	P28663	Beta-soluble NSF attachment protein OS=Mus musculus OX=10090 GN=Napb PE=1 SV=2	0	235.677	68	21	123	17	1	298	33.5	5.47	490.59	21	4	1.172	1.471	1.274	1.548	1.34	1.442	1.604	1.383	73.6	86.2	108.2	93.7	113.9	98.6	106.1	118	101.7	High	High	High	High	High	High	High	High	High
FALSE	High	Master Protein	Q6PHZ2	Calcium/calmodulin-dependent protein kinase type II subunit delta OS=Mus musculus OX=10090 GN=Camk2d PE=1 SV=1	0	232.608	53	28	338	14	1	499	56.3	7.25	1053.99	28	0	1.323	0.946	1.273	1.028	1.363	0.968	0.941	1.234	89.3	118.1	84.5	113.7	91.8	121.8	86.5	84	110.2	High	High	High	High	High	High	High	High	High
FALSE	High	Master Protein	P63011	Ras-related protein Rab-3A OS=Mus musculus OX=10090 GN=Rab3a PE=1 SV=1	0	229.174	65	17	217	8	1	220	25	5.03	748.69	17	10	0.088	0.938	0.744	0.967	0.753	0.887	0.945	0.753	127.2	11.3	119.3	94.7	123	95.8	112.8	120.2	95.8	High	High	High	High	High	High	High	High	High
FALSE	High	Master Protein	Q9JME5	AP-3 complex subunit beta-2 OS=Mus musculus OX=10090 GN=Ap3b2 PE=1 SV=2	0	229.082	33	33	144	27	1	1082	119.1	5.63	448.41	33	4	1.885	1.19	1.178	1.143	1.101	1.33	1.223	1.263	79.6	149.9	94.6	93.7	91	87.6	105.8	97.3	100.5	High	High	High	High	High	High	High	High	High
FALSE	High	Master Protein	Q68FF6	ARF GTPase-activating protein GIT1 OS=Mus musculus OX=10090 GN=Git1 PE=1 SV=1	0	227.008	43	26	99	24	1	770	85.2	6.93	334.17	26	0	2.154	1.038	1.259	0.939	1.219	1.155	1.075	1.241	81.2	175	84.3	102.3	76.3	99	93.8	87.3	100.8	High	High	High	High	High	High	High	High	High
FALSE	High	Master Protein	Q8K1M6	Dynamin-1-like protein OS=Mus musculus OX=10090 GN=Dnm1l PE=1 SV=2	0	226.099	50	31	87	31	1	742	82.6	7.05	314.7	31	0	2.13	1.029	1.017	1.036	1.024	1.019	0.952	1.015	88.1	187.5	90.6	89.6	91.2	90.1	89.7	83.8	89.4	High	High	High	High	High	High	High	High	High
FALSE	High	Master Protein	P28738	Kinesin heavy chain isoform 5C OS=Mus musculus OX=10090 GN=Kif5c PE=1 SV=3	0	224.344	48	43	101	31	1	956	109.2	6.19	283.59	43	4	0.368	1.299	1.436	1.341	1.437	1.311	1.216	1.369	83.5	30.7	108.5	119.9	112	120	109.5	101.6	114.4	High	High	High	High	High	High	High	High	High
FALSE	High	Master Protein	P20029	Endoplasmic reticulum chaperone BiP OS=Mus musculus OX=10090 GN=Hspa5 PE=1 SV=3	0	224.301	47	29	150	26	1	655	72.4	5.16	508.4	29	0	0.218	0.95	0.9	0.978	0.929	0.922	0.964	0.93	115.5	25.1	109.8	103.9	112.9	107.3	106.5	111.4	107.5	High	High	High	High	High	High	High	High	High
FALSE	High	Master Protein	Q80U28	MAP kinase-activating death domain protein OS=Mus musculus OX=10090 GN=Madd PE=1 SV=2	0	220.365	26	36	84	36	1	1577	175.1	6.04	269.89	36	0	0.01	1.139	1.064	0.994	0.932	0.85	0.934	1.093	112.4		128	119.6	111.7	104.8	95.6	105	122.9	High	High	High	High	High	High	High	High	High
FALSE	High	Master Protein	Q9JLN9	Serine/threonine-protein kinase mTOR OS=Mus musculus OX=10090 GN=Mtor PE=1 SV=2	0	216.397	18	38	78	38	1	2549	288.6	7.17	271	38	0	0.508	1.181	1.146	1.265	1.294	1.165	1.214	1.219	90.1	45.8	106.3	103.3	114	116.6	104.9	109.3	109.8	High	High	High	High	High	High	High	High	High
FALSE	High	Master Protein	P15105	Glutamine synthetase OS=Mus musculus OX=10090 GN=Glul PE=1 SV=6	0	213.719	59	22	206	22	1	373	42.1	7.08	768.32	22	0	0.278	1.628	1.322	1.745	1.313	1.597	1.691	1.375	75.3	21	122.6	99.6	131.4	98.9	120.3	127.4	103.6	High	High	High	High	High	High	High	High	High
FALSE	High	Master Protein	Q7TQF7	Amphiphysin OS=Mus musculus OX=10090 GN=Amph PE=1 SV=1	0	213.014	48	28	115	26	1	686	75	4.63	385.99	28	2	0.105	1.403	1.189	1.592	1.15	1.329	1.402	1.369	85.4	8.9	119.8	101.6	136	98.2	113.5	119.7	116.9	High	High	High	High	High	High	High	High	High
FALSE	High	Master Protein	P11881	Inositol 1,4,5-trisphosphate receptor type 1 OS=Mus musculus OX=10090 GN=Itpr1 PE=1 SV=2	0	208.113	20	40	74	39	1	2749	313	6.04	221.09	40	0	0.338	0.68	0.676	0.64	0.653	0.702	0.667	0.696	148.7	50.2	101.1	100.6	95.1	97.1	104.4	99.3	103.5	High	High	High	High	High	High	High	High	High
FALSE	High	Master Protein	Q9WV92	Band 4.1-like protein 3 OS=Mus musculus OX=10090 GN=Epb41l3 PE=1 SV=1	0	205.53	40	29	79	28	1	929	103.3	5.31	249.61	29	0	0.317	0.907	0.828	0.905	0.889	0.926	0.896	0.948	118.2	37.4	107.1	97.9	107	105	109.5	105.9	112	High	High	High	High	High	High	High	High	High
FALSE	High	Master Protein	P62823	Ras-related protein Rab-3C OS=Mus musculus OX=10090 GN=Rab3c PE=1 SV=1	0	204.431	53	16	156	8	1	227	25.9	5.24	493.43	16	1	0.18	1.187	0.921	1.236	0.848	1.021	1.245	0.898	105.4	19	125.1	97.1	130.3	89.4	107.7	131.3	94.7	High	High	High	High	High	High	High	High	High
FALSE	High	Master Protein	Q8CHG7	Rap guanine nucleotide exchange factor 2 OS=Mus musculus OX=10090 GN=Rapgef2 PE=1 SV=2	0	203.408	30	30	56	30	1	1496	166.3	6.61	200.82	30	0	0.954	1.03	1.073	1.119	1.178	1.198	1.098	1.094	92.4	88.2	95.1	99.1	103.4	108.8	110.6	101.4	101.1	High	High	High	High	High	High	High	High	High
FALSE	High	Master Protein	Q9Z0R4	Intersectin-1 OS=Mus musculus OX=10090 GN=Itsn1 PE=1 SV=2	0	203.01	24	38	99	32	1	1714	194.2	7.91	297.18	38	5	0.31	0.889	0.818	0.901	0.935	0.93	0.91	0.891	118.7	36.8	105.5	97.1	107	111	110.4	108	105.7	High	High	High	High	High	High	High	High	High
FALSE	High	Master Protein	O35633	Vesicular inhibitory amino acid transporter OS=Mus musculus OX=10090 GN=Slc32a1 PE=1 SV=3	0	200.687	33	16	209	16	1	525	57.3	6.64	722.94	16	0	0.346	0.689	0.554	0.672	0.548	0.833	0.669	0.54	153.8	53.3	105.9	85.1	103.4	84.3	128.2	102.9	83.1	High	High	High	High	High	High	High	High	High
FALSE	High	Master Protein	O35526	Syntaxin-1A OS=Mus musculus OX=10090 GN=Stx1a PE=1 SV=3	0	200.227	66	21	114	17	1	288	33	5.24	415.89	21	0	1.459	1.546	1.134	1.525	1.098	1.311	1.562	1.183	76.2	111.2	117.7	86.3	116.1	83.6	99.8	119	90.1	High	High	High	High	High	High	High	High	High
FALSE	High	Master Protein	P47708	Rabphilin-3A OS=Mus musculus OX=10090 GN=Rph3a PE=1 SV=2	0	200.15	47	26	75	26	1	681	75.4	8.27	264.19	26	0	0.01	1.441	1.331	1.509	1.397	1.331	1.492	1.363	82.8		119.4	110.2	125	115.7	110.2	123.6	112.9	High	High	High	High	High	High	High	High	High
FALSE	High	Master Protein	Q8BZ98	Dynamin-3 OS=Mus musculus OX=10090 GN=Dnm3 PE=1 SV=1	0	199.821	36	27	136	16	1	863	97.1	8.35	432.81	27	1	1.168	0.969	0.814	0.996	0.856	0.94	0.987	0.92	104	121.5	100.8	84.7	103.6	89.1	97.8	102.7	95.7	High	High	High	High	High	High	High	High	High
FALSE	High	Master Protein	Q03517	Secretogranin-2 OS=Mus musculus OX=10090 GN=Scg2 PE=1 SV=1	0	197.053	51	25	86	25	1	617	70.6	4.75	314.66	25	0	0.74	1.214	1.183	1.165	1.145	1.2	1.222	1.257	88.9	65.7	107.9	105.1	103.6	101.8	106.6	108.6	111.7	High	High	High	High	High	High	High	High	High
FALSE	High	Master Protein	P52480	Pyruvate kinase PKM OS=Mus musculus OX=10090 GN=Pkm PE=1 SV=4	0	195.266	49	23	97	23	1	531	57.8	7.47	321.71	23	0	0.414	1.122	1.051	1.146	1.106	1.071	1.191	1.1	97.8	40.5	109.7	102.8	112.1	108.1	104.7	116.5	107.6	High	High	High	High	High	High	High	High	High
FALSE	High	Master Protein	P62737	Actin, aortic smooth muscle OS=Mus musculus OX=10090 GN=Acta2 PE=1 SV=1	0	194.967	41	19	501	3	1	377	42	5.39	1566.99	19	0	4.374	1.095	1.624	1.139	1.2	1.121	1.066	1.36	64.4	281.6	70.5	104.5	73.4	77.3	72.2	68.6	87.6	High	High	High	High	High	High	High	High	High
FALSE	High	Master Protein	Q8K0U4	Heat shock 70 kDa protein 12A OS=Mus musculus OX=10090 GN=Hspa12a PE=1 SV=1	0	194.432	39	23	78	23	1	675	74.8	6.77	250.94	23	0	0.144	1.017	1.206	1.03	1.272	1.051	0.985	1.193	101.1	14.6	102.8	122	104.2	128.7	106.3	99.7	120.6	High	High	High	High	High	High	High	High	High
FALSE	High	Master Protein	P63044	Vesicle-associated membrane protein 2 OS=Mus musculus OX=10090 GN=Vamp2 PE=1 SV=2	0	194.329	46	8	330	5	1	116	12.7	8.13	1456.8	8	0	0.503	1.196	0.737	1.174	0.762	1.017	1.118	0.74	109.1	54.9	130.6	80.5	128.1	83.2	111	122	80.7	High	High	High	High	High	High	High	High	High
FALSE	High	Master Protein	P07724	Serum albumin OS=Mus musculus OX=10090 GN=Alb PE=1 SV=3	0	193.193	48	26	173	26	1	608	68.6	6.07	575.08	26	0	0.579	1.06	0.873	0.807	0.643	0.872	0.789	0.828	120.8	70	128.1	105.5	97.5	77.6	105.4	95.3	100	High	High	High	High	High	High	High	High	High
FALSE	High	Master Protein	P68404	Protein kinase C beta type OS=Mus musculus OX=10090 GN=Prkcb PE=1 SV=4	0	191.921	38	25	141	16	1	671	76.7	7.01	587.88	25	6	0.226	1.759	1.255	1.687	1.184	1.714	1.725	1.26	76.2	17.3	134.1	95.6	128.6	90.2	130.6	131.5	96	High	High	High	High	High	High	High	High	High
FALSE	High	Master Protein	P06837	Neuromodulin OS=Mus musculus OX=10090 GN=Gap43 PE=1 SV=1	0	190.997	86	21	74	20	1	227	23.6	4.73	275.16	21	1	0.352	1.313	1.149	1.14	0.991	1.248	1.302	1.08	94	33.1	123.5	108	107.1	93.2	117.3	122.4	101.5	High	High	High	High	High	High	High	High	High
FALSE	High	Master Protein	Q9QXL2	Kinesin-like protein KIF21A OS=Mus musculus OX=10090 GN=Kif21a PE=1 SV=2	0	190.725	23	30	69	29	1	1672	186.4	6.27	236.77	30	0	1.201	0.951	1.767	0.939	1.886	0.984	0.908	1.737	79.1	95	75.3	139.9	74.3	149.2	77.9	71.9	137.4	High	High	High	High	High	High	High	High	High
FALSE	High	Master Protein	P51863	V-type proton ATPase subunit d 1 OS=Mus musculus OX=10090 GN=Atp6v0d1 PE=1 SV=2	0	190.577	47	17	253	17	1	351	40.3	5	840.66	17	0	0.117	1.325	0.862	1.318	0.871	1.235	1.363	0.946	99.6	11.7	132	85.8	131.2	86.7	123	135.8	94.2	High	High	High	High	High	High	High	High	High
FALSE	High	Master Protein	Q8BLE7	Vesicular glutamate transporter 2 OS=Mus musculus OX=10090 GN=Slc17a6 PE=1 SV=1	0	189.527	34	19	126	18	1	582	64.5	6.68	384.72	19	1	3.687	1.508	1.065	1.451	1.094	1.295	1.515	1.093	65.7	242.1	99	69.9	95.3	71.8	85	99.5	71.8	High	High	High	High	High	High	High	High	High
FALSE	High	Master Protein	Q99KJ8	Dynactin subunit 2 OS=Mus musculus OX=10090 GN=Dctn2 PE=1 SV=3	0	189.327	60	23	72	23	1	402	44.1	5.26	266.77	23	0	1.739	1.177	1.327	1.276	1.147	1.191	1.12	1.33	79.6	138.4	93.7	105.6	101.6	91.3	94.8	89.1	105.8	High	High	High	High	High	High	High	High	High
FALSE	High	Master Protein	Q60932	Voltage-dependent anion-selective channel protein 1 OS=Mus musculus OX=10090 GN=Vdac1 PE=1 SV=3	0	188.8	68	16	68	14	1	296	32.3	8.43	294.38	16	1	1.417	1.103	0.99	1.183	1.084	1.167	1.177	1.087	88.2	124.9	97.2	87.3	104.3	95.6	102.9	103.8	95.9	High	High	High	High	High	High	High	High	High
FALSE	High	Master Protein	P16330	2',3'-cyclic-nucleotide 3'-phosphodiesterase OS=Mus musculus OX=10090 GN=Cnp PE=1 SV=3	0	188.4	50	24	124	24	1	420	47.1	8.97	394.87	24	0	0.411	0.951	0.963	0.937	1.034	0.936	1.012	1.004	109.1	44.8	103.7	105.1	102.2	112.9	102.1	110.4	109.6	High	High	High	High	High	High	High	High	High
FALSE	High	Master Protein	Q9WTT4	V-type proton ATPase subunit G 2 OS=Mus musculus OX=10090 GN=Atp6v1g2 PE=1 SV=1	0	185.829	47	10	155	10	1	118	13.6	10.26	515.85	10	0	0.498	1.617	1.065	1.665	1.174	1.463	1.63	1.15	79.9	39.8	129.2	85.1	133	93.8	116.9	130.3	91.9	High	High	High	High	High	High	High	High	High
FALSE	High	Master Protein	O88485	Cytoplasmic dynein 1 intermediate chain 1 OS=Mus musculus OX=10090 GN=Dync1i1 PE=1 SV=2	0	183.191	40	22	83	20	1	628	70.7	5.12	317.66	22	1	0.983	1.467	1.693	1.564	1.793	1.48	1.47	1.729	68.3	67.1	100.2	115.6	106.8	122.5	101.1	100.4	118.1	High	High	High	High	High	High	High	High	High
FALSE	High	Master Protein	Q9JLM8	Serine/threonine-protein kinase DCLK1 OS=Mus musculus OX=10090 GN=Dclk1 PE=1 SV=1	0	182.385	38	25	112	24	1	756	84.1	8.87	359.35	25	0	0.125	0.869	0.86	0.895	0.878	0.924	0.887	0.842	123.6	15.5	107.4	106.3	110.7	108.5	114.3	109.6	104.1	High	High	High	High	High	High	High	High	High
FALSE	High	Master Protein	Q01853	Transitional endoplasmic reticulum ATPase OS=Mus musculus OX=10090 GN=Vcp PE=1 SV=4	0	182.03	42	25	60	25	1	806	89.3	5.26	200.72	25	0	0.625	0.966	1.227	0.946	1.271	0.993	0.921	1.272	97.6	61	94.3	119.8	92.3	124	96.9	89.9	124.1	High	High	High	High	High	High	High	High	High
FALSE	High	Master Protein	P57746	V-type proton ATPase subunit D OS=Mus musculus OX=10090 GN=Atp6v1d PE=1 SV=1	0	182	69	21	156	21	1	247	28.4	9.45	516.53	21	0	0.336	1.555	1.013	1.564	0.976	1.372	1.554	1.125	85.8	28.8	133.3	86.9	134.1	83.7	117.7	133.2	96.5	High	High	High	High	High	High	High	High	High
FALSE	High	Master Protein	P42669	Transcriptional activator protein Pur-alpha OS=Mus musculus OX=10090 GN=Pura PE=1 SV=1	0	170.66	50	13	85	12	1	321	34.9	6.44	347.36	13	1	0.592	1.416	1.393	1.175	1.11	1.623	1.496	1.539	79.3	47	112.4	110.5	93.2	88.1	128.8	118.7	122.1	High	High	High	High	High	High	High	High	High
FALSE	High	Master Protein	P17710	Hexokinase-1 OS=Mus musculus OX=10090 GN=Hk1 PE=1 SV=3	0	168.698	32	27	66	27	1	974	108.2	6.8	217.96	27	0	0.371	1.373	1.395	1.39	1.448	1.334	1.335	1.374	81.7	30.3	112.2	113.9	113.5	118.3	108.9	109	112.2	High	High	High	High	High	High	High	High	High
FALSE	High	Master Protein	Q6Q477	Plasma membrane calcium-transporting ATPase 4 OS=Mus musculus OX=10090 GN=Atp2b4 PE=1 SV=1	0	167.886	18	20	61	9	1	1205	133	6.13	232.69	20	0	1.199	1.266	1.085	1.238	1.099	1.136	1.208	1.084	87.2	104.6	110.5	94.6	108	95.9	99.1	105.4	94.6	High	High	High	High	High	High	High	High	High
FALSE	High	Master Protein	P10126	Elongation factor 1-alpha 1 OS=Mus musculus OX=10090 GN=Eef1a1 PE=1 SV=3	0	167.623	46	22	154	13	1	462	50.1	9.01	493.04	22	8	0.207	1.372	1.384	1.217	1.058	1.297	1.28	1.294	89	18.4	122.2	123.2	108.4	94.2	115.4	113.9	115.2	High	High	High	High	High	High	High	High	High
FALSE	High	Master Protein	Q6VNB8	WD repeat and FYVE domain-containing protein 3 OS=Mus musculus OX=10090 GN=Wdfy3 PE=1 SV=1	0	167.295	11	29	52	29	1	3508	392.1	6.8	163.88	29	0	2.076	1.191	1.057	1.236	1.167	1.229	1.201	1.097	80	166.1	95.2	84.6	98.8	93.3	98.3	96	87.7	High	High	High	High	High	High	High	High	High
FALSE	High	Master Protein	Q9QYX7	Protein piccolo OS=Mus musculus OX=10090 GN=Pclo PE=1 SV=4	0	164.934	8	28	47	26	1	5068	550.5	6.51	149.05	28	0	0.01	0.962	1.017	1.062	1.103	1.045	1.023	1.066	108.7		104.6	110.6	115.4	119.9	113.6	111.2	115.9	High	Not Found	High	High	High	High	High	High	High
FALSE	High	Master Protein	Q5SWU9	Acetyl-CoA carboxylase 1 OS=Mus musculus OX=10090 GN=Acaca PE=1 SV=1	0	162.883	15	30	58	30	1	2345	265.1	6.39	175.67	30	0	1.389	1.03	1.259	1.037	1.344	1.044	0.972	1.224	87.4	121.4	90	110	90.6	117.5	91.2	84.9	107	High	High	High	High	High	High	High	High	High
FALSE	High	Master Protein	Q99P72	Reticulon-4 OS=Mus musculus OX=10090 GN=Rtn4 PE=1 SV=2	0	161.387	37	22	52	22	1	1162	126.5	4.54	200.41	22	0	0.218	0.691	0.719	0.727	0.76	0.751	0.703	0.796	141.4	30.8	97.7	101.6	102.9	107.4	106.2	99.4	112.5	High	High	High	High	High	High	High	High	High
FALSE	High	Master Protein	P11499	Heat shock protein HSP 90-beta OS=Mus musculus OX=10090 GN=Hsp90ab1 PE=1 SV=3	0	161.223	36	22	63	11	1	724	83.2	5.03	201.2	22	5	1.467	1.126	1.001	1.135	1.094	1.104	1.097	1.038	89.5	131.2	100.8	89.5	101.5	97.8	98.8	98.1	92.8	High	High	High	High	High	High	High	High	High
FALSE	High	Master Protein	Q8BX70	Vacuolar protein sorting-associated protein 13C OS=Mus musculus OX=10090 GN=Vps13c PE=1 SV=2	0	161.069	10	30	44	30	1	3748	419.8	6.81	140.55	30	0	0.606	0.842	0.765	0.834	0.795	0.842	0.759	0.762	124.9	75.7	105.2	95.5	104.2	99.3	105.2	94.8	95.2	High	High	High	High	High	High	High	High	High
FALSE	High	Master Protein	P12382	ATP-dependent 6-phosphofructokinase, liver type OS=Mus musculus OX=10090 GN=Pfkl PE=1 SV=4	0	159.542	33	22	76	15	1	780	85.3	7.17	274.64	22	0	1.067	1.095	1.305	1.141	1.332	1.071	1.107	1.222	87	92.8	95.3	113.6	99.3	115.9	93.2	96.3	106.3	High	High	High	High	High	High	High	High	High
FALSE	High	Master Protein	O88487	Cytoplasmic dynein 1 intermediate chain 2 OS=Mus musculus OX=10090 GN=Dync1i2 PE=1 SV=1	0	158.723	40	19	56	18	1	612	68.4	5.29	189.45	19	0	0.591	1.536	1.853	1.637	1.863	1.541	1.491	1.751	67.9	40.1	104.2	125.8	111.1	126.4	104.6	101.2	118.8	High	High	High	High	High	High	High	High	High
FALSE	High	Master Protein	Q9CWZ7	Gamma-soluble NSF attachment protein OS=Mus musculus OX=10090 GN=Napg PE=1 SV=1	0	158.215	66	21	90	21	1	312	34.7	5.41	280.34	21	0	0.2	1.772	1.402	1.831	1.4	1.449	1.901	1.521	72.1	14.4	127.9	101.1	132.1	101	104.5	137.1	109.8	High	High	High	High	High	High	High	High	High
FALSE	High	Master Protein	P05064	Fructose-bisphosphate aldolase A OS=Mus musculus OX=10090 GN=Aldoa PE=1 SV=2	0	157.65	62	21	87	16	1	364	39.3	8.09	306.68	21	2	0.293	1.098	1.064	1.141	1.154	1.089	1.151	1.119	98.8	29	108.5	105.1	112.7	114	107.6	113.7	110.5	High	High	High	High	High	High	High	High	High
FALSE	High	Master Protein	Q8BG39	Synaptic vesicle glycoprotein 2B OS=Mus musculus OX=10090 GN=Sv2b PE=1 SV=1	0	157.582	31	18	187	16	1	683	77.4	5.57	666.68	18	1	0.068	1.606	0.98	1.505	0.943	1.259	1.589	1.022	90.2	6.2	145	88.5	135.8	85.1	113.6	143.3	92.3	High	High	High	High	High	High	High	High	High
FALSE	High	Master Protein	O08638	Myosin-11 OS=Mus musculus OX=10090 GN=Myh11 PE=1 SV=1	0	157.185	13	25	152	5	1	1972	226.9	5.45	462	25	0	0.01	0.915	1.138	0.981	1.218	0.942	1.121	1.585	101.1		92.6	115	99.2	123.1	95.3	113.3	160.3	High	High	High	High	High	High	High	High	High
FALSE	High	Master Protein	P70398	Probable ubiquitin carboxyl-terminal hydrolase FAF-X OS=Mus musculus OX=10090 GN=Usp9x PE=1 SV=2	0	157.076	12	26	57	26	1	2559	290.5	5.87	171.24	26	0	0.727	1.214	1.104	1.221	1.141	0.992	1.159	1.066	93.5	68	113.6	103.2	114.2	106.7	92.8	108.4	99.7	High	High	High	High	High	High	High	High	High
FALSE	High	Master Protein	Q7TPH6	E3 ubiquitin-protein ligase MYCBP2 OS=Mus musculus OX=10090 GN=Mycbp2 PE=1 SV=2	0	155.635	9	26	33	26	1	4711	517.4	7.12	118.29	26	0	0.311	0.974	0.878	0.998	0.95	0.945	0.956	0.903	113.7	35.4	110.7	99.8	113.5	108	107.5	108.7	102.7	High	High	High	High	High	High	High	High	High
FALSE	High	Master Protein	Q9Z1G3	V-type proton ATPase subunit C 1 OS=Mus musculus OX=10090 GN=Atp6v1c1 PE=1 SV=4	0	154.472	45	21	210	21	1	382	43.9	7.46	683.27	21	0	0.246	1.683	1.098	1.692	1.04	1.464	1.701	1.122	81.5	20	137.1	89.5	137.9	84.7	119.3	138.6	91.4	High	High	High	High	High	High	High	High	High
FALSE	High	Master Protein	Q3UGY8	Brefeldin A-inhibited guanine nucleotide-exchange protein 3 OS=Mus musculus OX=10090 GN=Arfgef3 PE=1 SV=1	0	154.115	11	20	39	20	1	2170	239.9	5.88	134.35	20	0	0.01	1.116	1.439	1.146	1.414	1.066	1.043	1.295	94.5		105.6	136	108.3	133.7	100.8	98.6	122.5	High	High	High	High	High	High	High	High	High
FALSE	High	Master Protein	P18872	Guanine nucleotide-binding protein G(o) subunit alpha OS=Mus musculus OX=10090 GN=Gnao1 PE=1 SV=3	0	153.982	46	14	150	13	1	354	40.1	5.53	464.65	14	1	0.387	1.259	1.227	1.127	1.105	1.331	1.374	1.31	88.9	34.5	112	109.1	100.2	98.3	118.4	122.2	116.5	High	High	High	High	High	High	High	High	High
FALSE	High	Master Protein	Q0KL02	Triple functional domain protein OS=Mus musculus OX=10090 GN=Trio PE=1 SV=3	0	153.753	11	25	36	21	1	3102	347.6	6.35	121.94	25	2	1.685	1.071	0.989	1.101	1.059	1.097	1.054	0.986	89.6	151	96	88.7	98.7	94.9	98.3	94.4	88.4	High	High	High	High	High	High	High	High	High
FALSE	High	Master Protein	Q9DB05	Alpha-soluble NSF attachment protein OS=Mus musculus OX=10090 GN=Napa PE=1 SV=1	0	151.707	68	17	68	13	1	295	33.2	5.45	253.95	17	0	0.01	1.514	1.243	1.559	1.27	1.435	1.535	1.346	82.5		125	102.6	128.7	104.9	118.4	126.7	111.1	High	High	High	High	High	High	High	High	High
FALSE	High	Master Protein	P63101	14-3-3 protein zeta/delta OS=Mus musculus OX=10090 GN=Ywhaz PE=1 SV=1	0	150.522	63	16	85	13	1	245	27.8	4.79	280.7	16	1	0.712	1.312	1.267	1.347	1.202	1.31	1.405	1.269	83.1	59.2	109.1	105.4	112	99.9	108.9	116.8	105.5	High	High	High	High	High	High	High	High	High
FALSE	High	Master Protein	A2AN08	E3 ubiquitin-protein ligase UBR4 OS=Mus musculus OX=10090 GN=Ubr4 PE=1 SV=1	0	147.233	6	23	40	23	1	5180	571.9	6.06	116.18	23	0	1.295	1.029	1.079	1.08	1.12	1.033	0.956	1.031	93.5	121.1	96.3	100.9	101	104.8	96.6	89.4	96.4	High	High	High	High	High	High	High	High	High
FALSE	High	Master Protein	Q61768	Kinesin-1 heavy chain OS=Mus musculus OX=10090 GN=Kif5b PE=1 SV=3	0	145.901	29	24	50	14	1	963	109.5	6.44	162.49	24	0	1.243	1.383	1.537	1.434	1.648	1.307	1.28	1.602	72.4	90	100.1	111.3	103.8	119.3	94.6	92.6	116	High	High	High	High	High	High	High	High	High
FALSE	High	Master Protein	O55131	Septin-7 OS=Mus musculus OX=10090 GN=Sept7 PE=1 SV=1	0	144.53	40	19	105	18	1	436	50.5	8.57	292.08	19	1	0.355	1.302	1.302	1.333	1.435	1.283	1.382	1.413	83.3	29.6	108.5	108.5	111	119.5	106.9	115.1	117.7	High	High	High	High	High	High	High	High	High
FALSE	High	Master Protein	Q61644	Protein kinase C and casein kinase substrate in neurons protein 1 OS=Mus musculus OX=10090 GN=Pacsin1 PE=1 SV=1	0	144.041	51	19	52	19	1	441	50.5	5.24	179.01	19	0	0.55	1.207	1.157	1.247	1.224	1.151	1.224	1.199	90.4	49.7	109.1	104.5	112.7	110.6	104	110.6	108.3	High	High	High	High	High	High	High	High	High
FALSE	High	Master Protein	P11983	T-complex protein 1 subunit alpha OS=Mus musculus OX=10090 GN=Tcp1 PE=1 SV=3	0	141.77	39	20	47	20	1	556	60.4	6.16	154.79	20	0	59.389	1.032	1.07	1.129	1.18	1.085	1.038	1.117	13.2	785.6	13.6	14.1	14.9	15.6	14.3	13.7	14.8	High	High	High	High	High	High	High	High	High
FALSE	High	Master Protein	P17182	Alpha-enolase OS=Mus musculus OX=10090 GN=Eno1 PE=1 SV=3	0	141.705	41	17	71	15	1	434	47.1	6.8	267.66	17	2	0.214	1.27	1.328	1.303	1.464	1.286	1.392	1.435	84.2	18	106.9	111.8	109.7	123.2	108.2	117.1	120.8	High	High	High	High	High	High	High	High	High
FALSE	High	Master Protein	Q8K0T0	Reticulon-1 OS=Mus musculus OX=10090 GN=Rtn1 PE=1 SV=1	0	141.472	32	16	69	15	1	780	83.5	4.58	272.42	16	0	0.342	0.7	0.658	0.7	0.653	0.761	0.687	0.643	146.5	50.1	102.5	96.4	102.6	95.7	111.5	100.6	94.2	High	High	High	High	High	High	High	High	High
FALSE	High	Master Protein	Q62442	Vesicle-associated membrane protein 1 OS=Mus musculus OX=10090 GN=Vamp1 PE=1 SV=1	0	141.007	45	8	167	5	1	118	12.9	6.65	639.66	8	3	0.458	1.101	0.733	0.805	0.719	0.9	0.899	0.852	120.5	55.2	132.7	88.3	97	86.7	108.5	108.4	102.7	High	High	High	High	High	High	High	High	High
FALSE	High	Master Protein	Q8K021	Secretory carrier-associated membrane protein 1 OS=Mus musculus OX=10090 GN=Scamp1 PE=1 SV=1	0	140.795	40	13	190	13	1	338	38	7.71	794.33	13	0	1.425	1.095	0.943	1.159	1.026	1.1	1.148	1.01	90.9	129.5	99.5	85.7	105.3	93.2	99.9	104.3	91.8	High	High	High	High	High	High	High	High	High
FALSE	High	Master Protein	P27773	Protein disulfide-isomerase A3 OS=Mus musculus OX=10090 GN=Pdia3 PE=1 SV=2	0	139.823	40	24	78	24	1	505	56.6	6.21	228.7	24	0	0.01	0.924	0.9	0.971	0.979	0.954	0.948	1.009	117.1		108.2	105.4	113.7	114.7	111.7	111.1	118.1	High	High	High	High	High	High	High	High	High
FALSE	High	Master Protein	Q8CCN5	Breast carcinoma-amplified sequence 3 homolog OS=Mus musculus OX=10090 GN=Bcas3 PE=1 SV=2	0	139.33	24	16	49	16	1	928	101	6.7	189.11	16	0	0.421	1.244	1.069	1.323	1.128	1.186	1.254	1.11	92.4	38.9	115	98.8	122.3	104.3	109.6	116	102.6	High	High	High	High	High	High	High	High	High
FALSE	High	Master Protein	P48318	Glutamate decarboxylase 1 OS=Mus musculus OX=10090 GN=Gad1 PE=1 SV=2	0	137.774	29	19	69	18	1	593	66.6	7.17	208.27	19	1	0.463	1.117	1.072	1.177	1.086	1.182	1.12	1.059	97	45	108.4	104	114.2	105.4	114.7	108.7	102.7	High	High	High	High	High	High	High	High	High
FALSE	High	Master Protein	Q61037	Tuberin OS=Mus musculus OX=10090 GN=Tsc2 PE=1 SV=1	0	137.624	14	19	46	19	1	1814	201.9	6.98	140.11	19	0	1.208	1.03	1.133	1.081	1.288	1.023	0.989	1.187	90.6	109.4	93.2	102.6	97.9	116.6	92.7	89.5	107.5	High	High	High	High	High	High	High	High	High
FALSE	High	Master Protein	Q8CI94	Glycogen phosphorylase, brain form OS=Mus musculus OX=10090 GN=Pygb PE=1 SV=3	0	136.532	32	24	71	19	1	843	96.7	6.73	228.03	24	3	0.01	1.105	1.184	1.051	0.999	1.151	0.955	1.018	106.4		117.6	125.9	111.7	106.3	122.4	101.6	108.2	High	High	High	High	High	High	High	High	High
FALSE	High	Master Protein	Q6PAJ1	Breakpoint cluster region protein OS=Mus musculus OX=10090 GN=Bcr PE=1 SV=3	0	136.36	24	20	47	20	1	1270	143	6.92	157.81	20	0	0.449	0.976	1.176	1.014	1.252	1.034	0.947	1.227	99.2	44.5	96.8	116.6	100.6	124.2	102.5	93.9	121.7	High	High	High	High	High	High	High	High	High
FALSE	High	Master Protein	Q9ES97	Reticulon-3 OS=Mus musculus OX=10090 GN=Rtn3 PE=1 SV=2	0	134.979	27	19	50	18	1	964	103.8	4.92	158.57	19	0	0.341	0.753	0.678	0.656	0.661	0.755	0.737	0.632	144.9	49.4	109.1	98.2	95	95.7	109.4	106.8	91.5	High	High	High	High	High	High	High	High	High
FALSE	High	Master Protein	Q9Z0H8	CAP-Gly domain-containing linker protein 2 OS=Mus musculus OX=10090 GN=Clip2 PE=1 SV=2	0	132.67	25	25	44	23	1	1047	115.8	6.48	144.47	25	2	0.451	0.941	1.109	0.881	1.119	1.033	0.924	1.081	105.4	47.5	99.2	116.9	92.8	117.9	108.9	97.4	114	High	High	High	High	High	High	High	High	High
FALSE	High	Master Protein	Q8C0T5	Signal-induced proliferation-associated 1-like protein 1 OS=Mus musculus OX=10090 GN=Sipa1l1 PE=1 SV=2	0	131.341	19	26	46	25	1	1782	196.9	8.13	116.44	26	1	0.01	0.656	0.641	0.678	0.703	0.705	0.655	0.716	156.4		102.6	100.2	106.1	109.9	110.3	102.5	112	High	High	High	High	High	High	High	High	High
FALSE	High	Master Protein	Q8BJI1	Sodium-dependent neutral amino acid transporter SLC6A17 OS=Mus musculus OX=10090 GN=Slc6a17 PE=1 SV=1	0	130.634	25	16	143	16	1	727	81	6.23	492.64	16	0	0.11	1.74	1.272	1.821	1.16	1.364	1.642	1.232	79.4	8.7	138.1	100.9	144.5	92	108.3	130.3	97.8	High	High	High	High	High	High	High	High	High
FALSE	High	Master Protein	Q810U3	Neurofascin OS=Mus musculus OX=10090 GN=Nfasc PE=1 SV=1	0	129.906	18	17	37	16	1	1240	137.9	6.19	149.35	17	1	0.509	0.96	0.93	0.99	1.017	0.999	0.986	0.999	107.3	54.6	103	99.8	106.2	109.1	107.2	105.7	107.2	High	High	High	High	High	High	High	High	High
FALSE	High	Master Protein	P28740	Kinesin-like protein KIF2A OS=Mus musculus OX=10090 GN=Kif2a PE=1 SV=2	0	129.853	33	20	94	20	1	705	79.7	6.73	292.36	20	0	2.198	0.727	1.137	0.732	1.188	0.797	0.706	1.076	94.1	206.9	68.4	107.1	68.9	111.8	75	66.5	101.2	High	High	High	High	High	High	High	High	High
FALSE	High	Master Protein	P35564	Calnexin OS=Mus musculus OX=10090 GN=Canx PE=1 SV=1	0	129.757	37	22	62	22	1	591	67.2	4.64	207.29	22	0	0.87	0.958	0.837	0.858	0.765	1.004	0.753	0.806	114.6	99.7	109.8	96	98.4	87.7	115.1	86.3	92.4	High	High	High	High	High	High	High	High	High
FALSE	High	Master Protein	P14211	Calreticulin OS=Mus musculus OX=10090 GN=Calr PE=1 SV=1	0	129.411	48	17	81	17	1	416	48	4.49	277.82	17	0	0.495	0.883	0.814	0.894	0.676	0.925	0.879	0.79	122.4	60.6	108	99.6	109.4	82.7	113.1	107.6	96.6	High	High	High	High	High	High	High	High	High
FALSE	High	Master Protein	P97427	Dihydropyrimidinase-related protein 1 OS=Mus musculus OX=10090 GN=Crmp1 PE=1 SV=1	0	128.588	28	15	85	10	1	572	62.1	7.12	317.63	15	0	0.01	1.577	1.574	0.952	1.045	1.334	1.604	1.625	84		132.5	132.3	80	87.8	112.1	134.8	136.5	High	Not Found	High	High	High	High	High	High	High
FALSE	High	Master Protein	P80315	T-complex protein 1 subunit delta OS=Mus musculus OX=10090 GN=Cct4 PE=1 SV=3	0	128.154	46	18	41	18	1	539	58	8.02	125.37	18	0	0.01	1.002	1.065	1.076	1.089	1.029	0.963	1.054	108.7		108.9	115.8	117	118.4	111.9	104.7	114.6	High	High	High	High	High	High	High	High	High
FALSE	High	Master Protein	P80560	Receptor-type tyrosine-protein phosphatase N2 OS=Mus musculus OX=10090 GN=Ptprn2 PE=1 SV=2	0	127.87	27	21	44	21	1	1001	111.4	5.95	168.26	21	0	3.208	1.073	0.912	1.041	0.915	1.046	1.026	0.932	80.7	258.8	86.6	73.6	84	73.9	84.4	82.8	75.2	High	High	High	High	High	High	High	High	High
FALSE	High	Master Protein	P48320	Glutamate decarboxylase 2 OS=Mus musculus OX=10090 GN=Gad2 PE=1 SV=1	0	127.736	28	14	115	13	1	585	65.2	6.9	359.2	14	0	0.519	1.503	1.418	1.476	1.387	1.486	1.515	1.409	76.8	39.8	115.5	109	113.4	106.5	114.2	116.4	108.3	High	High	High	High	High	High	High	High	High
FALSE	High	Master Protein	Q9QXY6	EH domain-containing protein 3 OS=Mus musculus OX=10090 GN=Ehd3 PE=1 SV=2	0	126.335	45	18	35	13	1	535	60.8	6.46	122.66	18	3	1.545	1.237	1.127	1.253	1.127	1.208	1.257	1.12	82.8	127.9	102.4	93.3	103.7	93.3	100	104	92.7	High	High	High	High	High	High	High	High	High
FALSE	High	Master Protein	Q8R1Q8	Cytoplasmic dynein 1 light intermediate chain 1 OS=Mus musculus OX=10090 GN=Dync1li1 PE=1 SV=1	0	126.093	42	18	57	18	1	523	56.6	6.42	206.49	18	0	2.814	1.513	1.653	1.534	1.611	1.31	1.445	1.521	62.5	175.8	94.6	103.3	95.9	100.7	81.8	90.3	95.1	High	High	High	High	High	High	High	High	High
FALSE	High	Master Protein	P07901	Heat shock protein HSP 90-alpha OS=Mus musculus OX=10090 GN=Hsp90aa1 PE=1 SV=4	0	125.013	25	16	48	7	1	733	84.7	5.01	168.36	16	0	0.01	1.188	0.961	1.153	0.905	1.093	1.085	0.922	108.3		128.7	104.1	124.9	98	118.4	117.6	99.9	High	Not Found	High	High	High	High	High	High	High
FALSE	High	Master Protein	Q9Z268	RasGAP-activating-like protein 1 OS=Mus musculus OX=10090 GN=Rasal1 PE=1 SV=2	0	124.505	31	18	59	18	1	799	89.3	6.37	183.99	18	0	0.01	1.505	1.13	1.568	1.181	1.398	1.508	1.148	86.2		129.7	97.5	135.2	101.9	120.5	130.1	99	High	High	High	High	High	High	High	High	High
FALSE	High	Master Protein	Q3UHD9	Arf-GAP with GTPase, ANK repeat and PH domain-containing protein 2 OS=Mus musculus OX=10090 GN=Agap2 PE=1 SV=1	0	124.307	25	18	33	18	1	1186	124.4	9.89	112.55	18	0	0.211	0.671	0.633	0.693	0.657	0.699	0.646	0.662	153.2	32.4	102.8	97.1	106.2	100.7	107.1	99	101.5	High	High	High	High	High	High	High	High	High
FALSE	High	Master Protein	P05063	Fructose-bisphosphate aldolase C OS=Mus musculus OX=10090 GN=Aldoc PE=1 SV=4	0	123.282	54	15	40	10	1	363	39.4	7.12	156.11	15	0	0.37	1.004	1.01	0.99	1.044	0.994	0.981	1.059	106.5	39.4	106.9	107.5	105.4	111.2	105.9	104.5	112.7	High	High	High	High	High	High	High	High	High
FALSE	High	Master Protein	P62821	Ras-related protein Rab-1A OS=Mus musculus OX=10090 GN=Rab1A PE=1 SV=3	0	123.282	75	14	176	7	1	205	22.7	6.21	563.79	14	6	0.134	0.799	0.666	0.76	0.558	0.754	0.803	0.658	146.8	19.6	117.3	97.7	111.5	81.9	110.6	117.8	96.7	High	High	High	High	High	High	High	High	High
FALSE	High	Master Protein	Q62188	Dihydropyrimidinase-related protein 3 OS=Mus musculus OX=10090 GN=Dpysl3 PE=1 SV=1	0	122.436	31	13	78	9	1	570	61.9	6.49	288.16	13	0	0.01	1.838	1.082	1.787	1.034	1.057	1.751	1.023	85.1		156.4	92.1	152.2	88	90	149.1	87.1	High	Not Found	High	High	High	High	High	High	High
FALSE	High	Master Protein	Q80TJ1	Calcium-dependent secretion activator 1 OS=Mus musculus OX=10090 GN=Cadps PE=1 SV=3	0	122.402	22	21	42	17	1	1355	153	5.74	132.1	21	1	0.354	1.137	1.001	1.155	0.987	1.123	1.06	1.001	102.1	36.1	116	102.2	117.9	100.8	114.6	108.2	102.1	High	High	High	High	High	High	High	High	High
FALSE	High	Master Protein	P16125	L-lactate dehydrogenase B chain OS=Mus musculus OX=10090 GN=Ldhb PE=1 SV=2	0	122.217	40	14	70	12	1	334	36.5	6.05	221.12	14	2	2.256	1.276	1.586	1.398	1.612	1.348	1.322	1.553	67.4	152.1	86	106.9	94.3	108.7	90.9	89.1	104.7	High	High	High	High	High	High	High	High	High
FALSE	High	Master Protein	Q80UP3	Diacylglycerol kinase zeta OS=Mus musculus OX=10090 GN=Dgkz PE=1 SV=2	0	122.209	25	18	42	18	1	929	104	8.09	137.22	18	0	0.01	0.719	0.819	0.751	0.856	0.81	0.721	0.847	138		99.2	113	103.6	118.1	111.7	99.5	116.9	High	High	High	High	High	High	High	High	High
FALSE	High	Master Protein	P80313	T-complex protein 1 subunit eta OS=Mus musculus OX=10090 GN=Cct7 PE=1 SV=1	0	122.092	38	16	45	16	1	544	59.6	7.84	150.78	16	0	0.546	1.117	1.131	1.165	1.17	1.154	1.112	1.139	94.4	51.5	105.4	106.8	110	110.5	108.9	105	107.5	High	High	High	High	High	High	High	High	High
FALSE	High	Master Protein	Q2PFD7	PH and SEC7 domain-containing protein 3 OS=Mus musculus OX=10090 GN=Psd3 PE=1 SV=2	0	121	18	19	48	19	1	1037	114.7	6.24	175.07	19	0	0.251	0.549	0.569	0.533	0.531	0.655	0.528	0.517	175.4	44.1	96.3	99.7	93.5	93.1	114.8	92.5	90.6	High	High	High	High	High	High	High	High	High
FALSE	High	Master Protein	P42932	T-complex protein 1 subunit theta OS=Mus musculus OX=10090 GN=Cct8 PE=1 SV=3	0	120.909	38	20	62	20	1	548	59.5	5.62	190.11	20	0	0.579	1.252	1.326	1.342	1.446	1.324	1.287	1.433	81.9	47.4	102.6	108.6	109.9	118.4	108.4	105.4	117.4	High	High	High	High	High	High	High	High	High
FALSE	High	Master Protein	Q80VP0	Tectonin beta-propeller repeat-containing protein 1 OS=Mus musculus OX=10090 GN=Tecpr1 PE=1 SV=1	0	120.896	19	20	51	20	1	1166	130.2	6.48	163.08	20	0	3.649	1.315	1.001	1.315	1.013	1.185	1.31	0.996	70.4	256.9	92.6	70.5	92.6	71.3	83.4	92.2	70.1	High	High	High	High	High	High	High	High	High
FALSE	High	Master Protein	Q8JZP2	Synapsin-3 OS=Mus musculus OX=10090 GN=Syn3 PE=1 SV=2	0	120.779	37	14	79	12	1	579	63.3	9.38	276.85	14	0	0.141	1.072	1.121	1.154	1.283	1.098	1.15	1.203	97.6	13.7	104.7	109.4	112.6	125.2	107.2	112.2	117.4	High	High	High	High	High	High	High	High	High
FALSE	High	Master Protein	Q3TXX4	Vesicular glutamate transporter 1 OS=Mus musculus OX=10090 GN=Slc17a7 PE=1 SV=2	0	120.464	16	11	170	10	1	560	61.6	7.34	570.07	11	0	0.175	1.758	1.006	1.79	1.025	1.282	1.783	1.03	83	14.5	145.9	83.5	148.5	85	106.3	147.9	85.4	High	High	High	High	High	High	High	High	High
FALSE	High	Master Protein	Q3TDK6	Protein rogdi homolog OS=Mus musculus OX=10090 GN=Rogdi PE=1 SV=2	0	119.478	43	12	104	12	1	287	32.1	8.18	386.32	12	0	0.064	1.371	1.05	1.444	1.133	1.273	1.427	1.133	91	5.8	124.7	95.5	131.4	103	115.8	129.8	103	High	High	High	High	High	High	High	High	High
FALSE	High	Master Protein	Q3UHL1	CaM kinase-like vesicle-associated protein OS=Mus musculus OX=10090 GN=Camkv PE=1 SV=2	0	119.002	43	15	34	15	1	512	54.8	5.54	133.92	15	0	0.468	1.277	1.091	1.156	1.034	1.209	1.145	1.144	94.5	44.2	120.7	103.1	109.2	97.7	114.3	108.2	108.1	High	High	High	High	High	High	High	High	High
FALSE	High	Master Protein	P80317	T-complex protein 1 subunit zeta OS=Mus musculus OX=10090 GN=Cct6a PE=1 SV=3	0	117.622	35	14	50	14	1	531	58	7.08	156.22	14	0	1.759	1.027	1.112	1.09	1.188	1.096	1.017	1.151	86.2	151.6	88.5	95.9	94	102.4	94.5	87.7	99.2	High	High	High	High	High	High	High	High	High
FALSE	High	Master Protein	Q3TXS7	26S proteasome non-ATPase regulatory subunit 1 OS=Mus musculus OX=10090 GN=Psmd1 PE=1 SV=1	0	117.528	28	19	43	19	1	953	105.7	5.39	125	19	0	0.01	0.965	0.911	0.991	0.985	0.978	0.883	0.933	117.7		113.6	107.2	116.7	115.9	115.2	103.9	109.8	High	High	High	High	High	High	High	High	High
FALSE	High	Master Protein	Q71LX4	Talin-2 OS=Mus musculus OX=10090 GN=Tln2 PE=1 SV=3	0	116.826	12	19	30	17	1	2375	253.5	5.8	109.06	19	1	0.031	0.722	0.772	0.781	0.889	0.783	0.733	0.846	137.3	4.2	99.2	105.9	107.2	122.1	107.6	100.6	116.1	High	High	High	High	High	High	High	High	High
FALSE	High	Master Protein	Q04690	Neurofibromin OS=Mus musculus OX=10090 GN=Nf1 PE=1 SV=1	0	116.687	9	20	37	20	1	2841	319.4	7.39	123.58	20	0	1.31	0.977	0.95	0.943	0.98	0.949	0.903	0.936	100.6	131.7	98.3	95.6	94.8	98.6	95.4	90.8	94.2	High	High	High	High	High	High	High	High	High
FALSE	High	Master Protein	Q62420	Endophilin-A1 OS=Mus musculus OX=10090 GN=Sh3gl2 PE=1 SV=2	0	116.239	53	15	78	12	1	352	39.9	5.39	292.14	15	2	11.528	1.141	1.201	1.254	1.232	1.223	1.159	1.242	42.9	494.5	49	51.5	53.8	52.9	52.5	49.7	53.3	High	High	High	High	High	High	High	High	High
FALSE	High	Master Protein	O35098	Dihydropyrimidinase-related protein 4 OS=Mus musculus OX=10090 GN=Dpysl4 PE=1 SV=1	0	115.931	34	13	36	11	1	572	61.9	6.98	146.62	13	0	0.581	1.191	1.207	1.188	1.275	1.096	1.158	1.237	90.6	52.7	107.9	109.4	107.7	115.5	99.3	105	112.1	High	High	High	High	High	High	High	High	High
FALSE	High	Master Protein	Q9D8N0	Elongation factor 1-gamma OS=Mus musculus OX=10090 GN=Eef1g PE=1 SV=3	0	114.108	34	14	66	14	1	437	50	6.74	206.2	14	0	0.01	0.732	0.937	0.78	1.027	0.794	0.719	0.957	129.6		94.8	121.4	101.1	133.1	102.8	93.2	124	High	High	High	High	High	High	High	High	High
FALSE	High	Master Protein	P51150	Ras-related protein Rab-7a OS=Mus musculus OX=10090 GN=Rab7a PE=1 SV=2	0	114.052	69	14	86	14	1	207	23.5	6.7	253.85	14	0	0.335	0.914	0.797	0.906	0.777	0.929	0.956	0.825	121	40.5	110.6	96.4	109.6	94	112.4	115.7	99.8	High	High	High	High	High	High	High	High	High
FALSE	High	Master Protein	Q64331	Unconventional myosin-VI OS=Mus musculus OX=10090 GN=Myo6 PE=1 SV=1	0	113.637	20	22	36	22	1	1265	146.3	8.85	119.45	22	0	0.01	0.625	0.574	0.624	0.637	0.612	0.551	0.605	172.1		107.6	98.8	107.4	109.6	105.4	94.9	104.2	High	High	High	High	High	High	High	High	High
FALSE	High	Master Protein	P58252	Elongation factor 2 OS=Mus musculus OX=10090 GN=Eef2 PE=1 SV=2	0	113.505	30	22	52	21	1	858	95.3	6.83	175.26	22	1	0.81	1.261	1.643	1.266	1.71	1.306	1.23	1.676	75.6	61.2	95.4	124.2	95.7	129.3	98.8	93	126.7	High	High	High	High	High	High	High	High	High
FALSE	High	Master Protein	Q80U49	Centrosomal protein of 170 kDa protein B OS=Mus musculus OX=10090 GN=Cep170b PE=1 SV=2	0	113.353	20	21	25	21	1	1574	170.7	6.87	80.87	21	0	0.01	0.722	0.966	0.752	0.949	0.805	0.705	0.905	132.3		95.5	127.7	99.5	125.5	106.4	93.3	119.7	High	Not Found	High	High	High	High	High	High	High
FALSE	High	Master Protein	O88448	Kinesin light chain 2 OS=Mus musculus OX=10090 GN=Klc2 PE=1 SV=1	0	112.028	35	19	44	15	1	599	66.6	7.21	146.98	19	3	0.089	1.192	1.252	1.232	1.271	1.159	1.109	1.234	94.4	8.4	112.5	118.2	116.2	119.9	109.4	104.6	116.4	High	High	High	High	High	High	High	High	High
FALSE	High	Master Protein	Q9CZT8	Ras-related protein Rab-3B OS=Mus musculus OX=10090 GN=Rab3b PE=1 SV=1	0	111.03	45	11	101	6	1	219	24.7	5.11	306.81	11	0	0.207	1.069	0.937	1.058	0.832	0.985	1.043	0.847	112.8	23.4	120.6	105.7	119.4	93.8	111.1	117.7	95.5	High	High	High	High	High	High	High	High	High
FALSE	High	Master Protein	Q8R361	Rab11 family-interacting protein 5 OS=Mus musculus OX=10090 GN=Rab11fip5 PE=1 SV=2	0	110.76	41	16	37	16	1	645	69.5	9.07	122.55	16	0	0.756	0.977	0.82	0.999	0.871	0.922	0.949	0.828	110.8	83.7	108.2	90.9	110.7	96.6	102.2	105.2	91.7	High	High	High	High	High	High	High	High	High
FALSE	High	Master Protein	P08113	Endoplasmin OS=Mus musculus OX=10090 GN=Hsp90b1 PE=1 SV=2	0	110.668	27	18	35	16	1	802	92.4	4.82	101.32	18	0	0.01	0.841	0.781	0.864	0.833	0.848	0.848	0.828	131.4	0.9	110.5	102.7	113.5	109.5	111.4	111.4	108.8	High	High	High	High	High	High	High	High	High
FALSE	High	Master Protein	Q9JKD3	Secretory carrier-associated membrane protein 5 OS=Mus musculus OX=10090 GN=Scamp5 PE=1 SV=1	0	110.589	29	4	212	4	1	235	26.1	8.54	659.71	4	0	0.01	1.351	0.819	1.248	0.74	1.163	1.326	0.78	106.8		144.3	87.5	133.3	79	124.2	141.6	83.3	High	High	High	High	High	High	High	High	High
FALSE	High	Master Protein	Q9ES28	Rho guanine nucleotide exchange factor 7 OS=Mus musculus OX=10090 GN=Arhgef7 PE=1 SV=2	0	110.43	21	16	49	14	1	862	97	6.8	147.82	16	1	0.01	1.064	1.109	1.119	1.162	1.125	1.092	1.081	102.8		109.4	114.1	115	119.5	115.7	112.3	111.2	High	High	High	High	High	High	High	High	High
FALSE	High	Master Protein	Q6PNC0	DmX-like protein 1 OS=Mus musculus OX=10090 GN=Dmxl1 PE=1 SV=1	0	110.333	7	17	26	14	1	3013	335.8	6.42	88.13	17	0	1.759	1.007	0.988	1.11	1.212	0.956	1.035	1.079	88.7	156	89.3	87.7	98.5	107.5	84.8	91.8	95.7	High	High	High	High	High	High	High	High	High
FALSE	High	Master Protein	P0DP27	Calmodulin-2 OS=Mus musculus OX=10090 GN=Calm2 PE=1 SV=1	0	109.172	77	11	85	11	1	149	16.8	4.22	214.38	11	0	0.373	1.108	1.058	0.959	0.758	1.038	1.08	1.024	107.2	40	118.8	113.4	102.8	81.2	111.2	115.7	109.7	High	High	High	High	High	High	High	High	High
FALSE	High	Master Protein	Q9EPW0	Type I inositol 3,4-bisphosphate 4-phosphatase OS=Mus musculus OX=10090 GN=Inpp4a PE=1 SV=1	0	109.115	22	17	41	17	1	939	105.5	7.05	142.89	17	0	1.003	0.928	0.949	0.939	1.006	0.97	0.934	0.932	103.9	104.3	96.5	98.6	97.6	104.5	100.8	97.1	96.8	High	High	High	High	High	High	High	High	High
FALSE	High	Master Protein	Q04447	Creatine kinase B-type OS=Mus musculus OX=10090 GN=Ckb PE=1 SV=1	0	109.056	31	10	65	9	1	381	42.7	5.67	252.28	10	0	5.519	1.183	1.083	1.159	1.108	1.16	1.174	1.087	62.2	343.2	73.6	67.3	72.1	68.9	72.1	73	67.6	High	High	High	High	High	High	High	High	High
FALSE	High	Master Protein	Q8K596	Sodium/calcium exchanger 2 OS=Mus musculus OX=10090 GN=Slc8a2 PE=1 SV=1	0	107.771	23	13	38	13	1	921	100.6	5.12	161.77	13	0	8.686	1.561	1.263	2.033	0.697	0.83	0.81	1.243	49.7	431.4	77.5	62.7	101	34.6	41.2	40.2	61.7	High	High	High	High	High	High	High	High	High
FALSE	High	Master Protein	A2A5R2	Brefeldin A-inhibited guanine nucleotide-exchange protein 2 OS=Mus musculus OX=10090 GN=Arfgef2 PE=1 SV=1	0	107.625	12	19	26	16	1	1792	202.1	6.55	78.65	19	0	4.237	1.045	1.052	1.059	1.064	1.019	0.94	1.056	72.2	305.8	75.4	75.9	76.4	76.8	73.5	67.8	76.2	High	High	High	High	High	High	High	High	High
FALSE	High	Master Protein	P62874	Guanine nucleotide-binding protein G(I)/G(S)/G(T) subunit beta-1 OS=Mus musculus OX=10090 GN=Gnb1 PE=1 SV=3	0	107.239	31	9	75	4	1	340	37.4	6	300.91	9	0	0.01	1.037	1.034	1.092	1.127	1.175	1.154	1.152	102.6		106.4	106.1	112	115.6	120.6	118.4	118.2	High	Not Found	High	High	High	High	High	High	High
FALSE	High	Master Protein	Q922S4	cGMP-dependent 3',5'-cyclic phosphodiesterase OS=Mus musculus OX=10090 GN=Pde2a PE=1 SV=4	0	107.047	21	15	32	15	1	939	105.6	5.41	99.25	15	0	1.514	1.214	0.908	1.197	0.96	1.035	1.165	0.912	90.9	137.6	110.3	82.5	108.8	87.2	94	105.9	82.8	High	High	High	High	High	High	High	High	High
FALSE	High	Master Protein	Q3UNH4	G protein-regulated inducer of neurite outgrowth 1 OS=Mus musculus OX=10090 GN=Gprin1 PE=1 SV=2	0	106.747	27	21	32	21	1	932	95.4	7.93	85.81	21	0	0.846	0.896	0.883	0.907	0.941	0.971	0.885	0.906	109.3	92.5	98	96.5	99.1	102.8	106.1	96.7	99	High	High	High	High	High	High	High	High	High
FALSE	High	Master Protein	Q9EPJ9	ADP-ribosylation factor GTPase-activating protein 1 OS=Mus musculus OX=10090 GN=Arfgap1 PE=1 SV=2	0	106.285	45	15	38	15	1	414	45.3	5.57	122.37	15	0	0.827	0.984	0.937	0.974	0.857	1.008	0.953	0.883	106.9	88.4	105.1	100.1	104.1	91.6	107.7	101.8	94.3	High	High	High	High	High	High	High	High	High
FALSE	High	Master Protein	Q8BLK3	Limbic system-associated membrane protein OS=Mus musculus OX=10090 GN=Lsamp PE=1 SV=1	0	105.989	33	11	78	11	1	341	38.1	6.65	256.65	11	0	0.184	1.003	0.886	0.998	0.905	1.079	1.061	1.022	110.6	20.4	110.9	98	110.4	100.1	119.3	117.3	113	High	High	High	High	High	High	High	High	High
FALSE	High	Master Protein	Q91V41	Ras-related protein Rab-14 OS=Mus musculus OX=10090 GN=Rab14 PE=1 SV=3	0	105.956	60	14	98	12	1	215	23.9	6.21	315.29	14	0	0.113	1.012	0.718	0.917	0.53	0.892	0.974	0.626	132.7	15	134.3	95.3	121.8	70.4	118.3	129.3	83	High	High	High	High	High	High	High	High	High
FALSE	High	Master Protein	O35954	Membrane-associated phosphatidylinositol transfer protein 1 OS=Mus musculus OX=10090 GN=Pitpnm1 PE=1 SV=1	0	105.856	21	18	37	17	1	1243	134.9	6.06	127.51	18	0	0.216	1.057	1.044	0.986	0.993	0.937	0.926	1.002	110.3	23.8	116.6	115.2	108.7	109.5	103.4	102.1	110.5	High	High	High	High	High	High	High	High	High
FALSE	High	Master Protein	Q8VEK3	Heterogeneous nuclear ribonucleoprotein U OS=Mus musculus OX=10090 GN=Hnrnpu PE=1 SV=1	0	105.64	25	16	37	16	1	800	87.9	6.24	130.69	16	0	0.353	1.152	0.986	1.192	1.12	0.949	1.203	1.039	100.1	35.3	115.3	98.6	119.3	112.1	95	120.4	104	High	High	High	High	High	High	High	High	High
FALSE	High	Master Protein	P62880	Guanine nucleotide-binding protein G(I)/G(S)/G(T) subunit beta-2 OS=Mus musculus OX=10090 GN=Gnb2 PE=1 SV=3	0	105.037	33	10	108	3	1	340	37.3	6	385.96	10	4	0.27	1.247	0.981	1.188	0.89	1.185	1.267	0.99	99.8	26.9	124.5	97.9	118.5	88.8	118.3	126.5	98.8	High	High	High	High	High	High	High	High	High
FALSE	High	Master Protein	P17183	Gamma-enolase OS=Mus musculus OX=10090 GN=Eno2 PE=1 SV=2	0	104.768	27	8	43	5	1	434	47.3	5.11	182.87	8	0	0.938	1.358	1.266	1.368	1.368	1.279	1.438	1.363	79.1	74.2	107.4	100.1	108.2	108.2	101.1	113.7	107.8	High	High	High	High	High	High	High	High	High
FALSE	High	Master Protein	Q3THE2	Myosin regulatory light chain 12B OS=Mus musculus OX=10090 GN=Myl12b PE=1 SV=2	0	104.38	60	11	98	5	1	172	19.8	4.84	367.58	11	5	0.606	1.054	1.123	0.999	0.94	0.997	0.918	0.94	104.9	63.6	110.6	117.9	104.8	98.6	104.6	96.3	98.6	High	High	High	High	High	High	High	High	High
FALSE	High	Master Protein	P62631	Elongation factor 1-alpha 2 OS=Mus musculus OX=10090 GN=Eef1a2 PE=1 SV=1	0	104.24	38	17	117	8	1	463	50.4	9.03	366.78	17	0	0.01	1.249	1.081	1.254	0.996	1.227	1.222	1.035	99.3		124	107.3	124.5	99	121.8	121.4	102.8	High	Not Found	High	High	High	High	High	High	High
FALSE	High	Master Protein	P20444	Protein kinase C alpha type OS=Mus musculus OX=10090 GN=Prkca PE=1 SV=3	0	104.006	17	13	69	4	1	672	76.8	7.14	232.66	13	0	0.01	0.943	0.665	0.762	0.228	0.965	0.931	0.553	148.8		140.3	99	113.4	33.9	143.7	138.6	82.3	High	Not Found	High	High	High	High	High	High	High
FALSE	High	Master Protein	Q9QXV0	ProSAAS OS=Mus musculus OX=10090 GN=Pcsk1n PE=1 SV=2	0	103.949	48	10	159	10	1	258	27.3	5.85	542.37	10	0	0.29	1.265	1.114	1.25	1.17	1.208	1.268	1.239	91.8	26.6	116.1	102.3	114.7	107.4	110.9	116.4	113.7	High	High	High	High	High	High	High	High	High
FALSE	High	Master Protein	E9Q3L2	Phosphatidylinositol 4-kinase alpha OS=Mus musculus OX=10090 GN=Pi4ka PE=1 SV=2	0	103.513	12	19	31	19	1	2105	236.9	7.06	91.09	19	0	3.383	1.001	0.968	1.039	1.009	0.977	0.974	0.949	79.6	269.4	79.7	77.1	82.8	80.3	77.8	77.5	75.6	High	High	High	High	High	High	High	High	High
FALSE	High	Master Protein	Q3UHK1	Proton myo-inositol cotransporter OS=Mus musculus OX=10090 GN=Slc2a13 PE=1 SV=2	0	103.102	19	12	45	12	1	637	69	6.86	160.59	12	0	0.24	1.078	1.029	1.094	0.923	1.054	1.007	0.99	107	25.7	115.3	110	117	98.7	112.8	107.7	105.8	High	High	High	High	High	High	High	High	High
FALSE	High	Master Protein	Q6PGN3	Serine/threonine-protein kinase DCLK2 OS=Mus musculus OX=10090 GN=Dclk2 PE=1 SV=1	0	102.689	23	14	26	13	1	756	82.9	8.44	86.98	14	0	0.471	0.753	0.695	0.729	0.78	0.817	0.676	0.739	135.1	63.7	101.8	93.9	98.5	105.4	110.4	91.4	99.8	High	High	High	High	High	High	High	High	High
FALSE	High	Master Protein	Q8BLQ9	Cell adhesion molecule 2 OS=Mus musculus OX=10090 GN=Cadm2 PE=1 SV=2	0	102.405	20	8	27	8	1	435	47.5	5.41	127.97	8	0	0.132	0.803	0.781	0.844	0.883	0.974	0.852	0.856	126.3	16.7	101.5	98.6	106.6	111.5	123	107.6	108.1	High	High	High	High	High	High	High	High	High
FALSE	High	Master Protein	Q8R570	Synaptosomal-associated protein 47 OS=Mus musculus OX=10090 GN=Snap47 PE=1 SV=1	0	102.215	47	15	30	15	1	413	46.5	5.76	107.61	15	0	0.244	1.079	0.939	1.042	0.907	1.036	1.077	0.912	109.3	26.7	117.9	102.6	113.8	99.2	113.2	117.7	99.6	High	High	High	High	High	High	High	High	High
FALSE	High	Master Protein	Q76MZ3	Serine/threonine-protein phosphatase 2A 65 kDa regulatory subunit A alpha isoform OS=Mus musculus OX=10090 GN=Ppp2r1a PE=1 SV=3	0	102.039	34	17	41	17	1	589	65.3	5.11	116.82	17	0	0.01	1.157	1.17	1.169	1.139	1.146	1.103	1.132	99.8		115.5	116.8	116.7	113.7	114.4	110.2	113	High	High	High	High	High	High	High	High	High
FALSE	High	Master Protein	E9Q401	Ryanodine receptor 2 OS=Mus musculus OX=10090 GN=Ryr2 PE=1 SV=1	0	101.955	5	21	38	21	1	4966	564.5	6.09	98	21	0	1.527	0.875	0.796	0.93	0.96	0.891	0.897	0.893	102.6	156.7	89.8	81.7	95.5	98.5	91.5	92.1	91.6	High	High	High	High	High	High	High	High	High
FALSE	High	Master Protein	P46471	26S proteasome regulatory subunit 7 OS=Mus musculus OX=10090 GN=Psmc2 PE=1 SV=5	0	101.521	43	16	35	16	1	433	48.6	5.95	107.43	16	0	0.838	1.107	1.465	1.14	1.607	1.138	1.124	1.483	82.6	69.1	91.4	121	94.1	132.7	93.9	92.8	122.5	High	High	High	High	High	High	High	High	High
FALSE	High	Master Protein	Q9CQD1	Ras-related protein Rab-5A OS=Mus musculus OX=10090 GN=Rab5a PE=1 SV=1	0	101.503	51	8	53	5	1	215	23.6	8.15	157.08	8	0	0.647	0.97	0.818	0.979	0.895	0.925	0.952	0.829	112.3	72.6	108.9	91.8	110	100.5	103.9	106.9	93.1	High	High	High	High	High	High	High	High	High
FALSE	High	Master Protein	Q62419	Endophilin-A2 OS=Mus musculus OX=10090 GN=Sh3gl1 PE=1 SV=1	0	101.329	43	14	44	11	1	368	41.5	5.72	150.06	14	0	0.691	1.15	1.039	1.258	1.084	1.173	1.225	1.097	92.6	64	106.5	96.2	116.6	100.4	108.7	113.4	101.6	High	High	High	High	High	High	High	High	High
FALSE	High	Master Protein	P60469	Liprin-alpha-3 OS=Mus musculus OX=10090 GN=Ppfia3 PE=1 SV=2	0	101.114	23	21	38	20	1	1194	133.3	5.64	117.07	21	0	0.01	0.989	1.084	1.027	1.119	0.993	0.922	1.094	109.4		108.2	118.5	112.4	122.4	108.6	100.9	119.6	High	High	High	High	High	High	High	High	High
FALSE	High	Master Protein	Q5RJI5	Serine/threonine-protein kinase BRSK1 OS=Mus musculus OX=10090 GN=Brsk1 PE=1 SV=1	0	100.776	25	16	43	12	1	778	85.1	9.32	116.81	16	0	0.01	0.986	0.958	1	0.943	0.957	0.95	0.945	116.3		114.7	111.4	116.3	109.6	111.2	110.5	109.9	High	High	High	High	High	High	High	High	High
FALSE	High	Master Protein	O35609	Secretory carrier-associated membrane protein 3 OS=Mus musculus OX=10090 GN=Scamp3 PE=1 SV=3	0	100.721	24	8	39	8	1	349	38.4	7.64	175.96	8	0	15.566	1.032	0.875	1.017	0.913	1.037	1.019	0.926	38.5	599.1	39.7	33.7	39.1	35.1	39.9	39.2	35.6	High	High	High	High	High	High	High	High	High
FALSE	High	Master Protein	P80318	T-complex protein 1 subunit gamma OS=Mus musculus OX=10090 GN=Cct3 PE=1 SV=1	0	100.313	40	21	42	21	1	545	60.6	6.7	113.24	21	0	1.302	1.055	1.036	1.072	1.015	1.075	1.038	0.985	94	122.3	99.1	97.3	100.7	95.3	101	97.5	92.6	High	High	High	High	High	High	High	High	High
FALSE	High	Master Protein	P17156	Heat shock-related 70 kDa protein 2 OS=Mus musculus OX=10090 GN=Hspa2 PE=1 SV=2	0	100.077	21	14	118	2	1	633	69.6	5.67	385.43	14	0	0.01	0.939	1.114	0.949	0.979	0.903	0.945	1.096	113.6		106.7	126.5	107.8	111.2	102.5	107.3	124.5	High	Not Found	High	High	High	High	High	High	High
FALSE	High	Master Protein	Q9D1G1	Ras-related protein Rab-1B OS=Mus musculus OX=10090 GN=Rab1b PE=1 SV=1	0	99.589	75	13	145	6	1	201	22.2	5.73	461.34	13	0	0.01	0.755	0.687	0.737	0.63	0.774	0.781	0.632	150.1		113.3	103.1	110.6	94.6	116.2	117.3	94.8	High	Not Found	High	High	High	High	High	High	High
FALSE	High	Master Protein	Q9DBT5	AMP deaminase 2 OS=Mus musculus OX=10090 GN=Ampd2 PE=1 SV=1	0	99.306	26	18	45	18	1	798	92	6.23	138.94	18	0	0.639	1.122	1.234	1.138	1.222	1.117	1.085	1.139	92.8	59.3	104.1	114.6	105.7	113.4	103.7	100.7	105.7	High	High	High	High	High	High	High	High	High
FALSE	High	Master Protein	Q9Z1B3	1-phosphatidylinositol 4,5-bisphosphate phosphodiesterase beta-1 OS=Mus musculus OX=10090 GN=Plcb1 PE=1 SV=2	0	99.038	20	17	32	17	1	1216	138.3	6.13	95.4	17	0	0.01	1.26	1.118	1.328	1.152	1.234	1.318	1.159	94		118.5	105.2	124.9	108.4	116	124	109	High	Not Found	High	High	High	High	High	High	High
FALSE	High	Master Protein	P97434	Myosin phosphatase Rho-interacting protein OS=Mus musculus OX=10090 GN=Mprip PE=1 SV=2	0	98.446	23	16	27	16	1	1024	116.3	6.21	81.56	16	0	0.01	0.754	0.884	0.778	0.96	0.778	0.704	0.92	132.8		100.1	117.4	103.3	127.5	103.4	93.4	122.1	High	Not Found	High	High	High	High	High	High	High
FALSE	High	Master Protein	Q9QXZ0	Microtubule-actin cross-linking factor 1 OS=Mus musculus OX=10090 GN=Macf1 PE=1 SV=2	0	98.424	5	24	26	24	1	7354	831.4	5.43	61.42	24	0	0.589	0.602	0.588	0.657	0.648	0.611	0.562	0.667	151.9	89.5	91.5	89.3	99.9	98.4	92.8	85.3	101.3	High	High	High	High	High	High	High	High	High
FALSE	High	Master Protein	P62196	26S proteasome regulatory subunit 8 OS=Mus musculus OX=10090 GN=Psmc5 PE=1 SV=1	0	97.791	44	15	29	13	1	406	45.6	7.55	96.4	15	1	0.01	0.857	0.773	0.884	0.81	0.909	0.84	0.77	131.5		112.7	101.7	116.2	106.5	119.5	110.4	101.3	High	Not Found	High	High	High	High	High	High	High
FALSE	High	Master Protein	P35278	Ras-related protein Rab-5C OS=Mus musculus OX=10090 GN=Rab5c PE=1 SV=2	0	97.699	50	8	67	5	1	216	23.4	8.41	231.74	8	3	1.248	0.99	0.878	0.996	0.876	0.965	0.989	0.882	102	127.3	101	89.5	101.6	89.3	98.4	100.9	89.9	High	High	High	High	High	High	High	High	High
FALSE	High	Master Protein	Q9Z0R6	Intersectin-2 OS=Mus musculus OX=10090 GN=Itsn2 PE=1 SV=2	0	97.521	14	24	39	18	1	1659	188.8	8.13	97.05	24	0	0.223	1.139	1.067	1.251	1.114	1.283	1.249	1.129	95.2	21.2	108.4	101.6	119.1	106.1	122.2	118.9	107.5	High	High	High	High	High	High	High	High	High
FALSE	High	Master Protein	Q80Z24	Neuronal growth regulator 1 OS=Mus musculus OX=10090 GN=Negr1 PE=1 SV=1	0	97.163	26	8	26	8	1	348	37.9	6.52	119.5	8	0	0.439	0.999	0.862	1.083	1.067	1.093	1.111	1.092	102.9	45.2	102.8	88.7	111.4	109.8	112.4	114.3	112.4	High	High	High	High	High	High	High	High	High
FALSE	High	Master Protein	O35239	Tyrosine-protein phosphatase non-receptor type 9 OS=Mus musculus OX=10090 GN=Ptpn9 PE=1 SV=2	0	96.525	24	13	36	13	1	593	67.9	8.1	122.05	13	0	0.594	1.004	0.736	0.999	0.782	0.936	0.983	0.771	115.3	68.5	115.7	84.9	115.2	90.2	108	113.3	88.9	High	High	High	High	High	High	High	High	High
FALSE	High	Master Protein	P14824	Annexin A6 OS=Mus musculus OX=10090 GN=Anxa6 PE=1 SV=3	0	96.117	32	20	34	19	1	673	75.8	5.5	97.28	20	1	0.868	1.353	1.233	0.66	0.602	0.638	0.641	1.391	107.3	93.2	145.2	132.3	70.8	64.6	68.5	68.7	149.3	High	High	High	High	High	High	High	High	High
FALSE	High	Master Protein	P63328	Serine/threonine-protein phosphatase 2B catalytic subunit alpha isoform OS=Mus musculus OX=10090 GN=Ppp3ca PE=1 SV=1	0	96.114	32	13	46	9	1	521	58.6	5.86	158.22	13	4	0.01	1.167	1.235	1.238	1.245	1.161	1.16	1.25	95.2		111.1	117.6	117.8	118.5	110.5	110.4	119	High	Not Found	High	High	High	High	High	High	High
FALSE	High	Master Protein	Q9JKK7	Tropomodulin-2 OS=Mus musculus OX=10090 GN=Tmod2 PE=1 SV=2	0	95.851	44	13	26	12	1	351	39.5	5.35	102.74	13	0	0.743	0.689	0.67	0.651	0.606	0.67	0.629	0.631	143.1	106.3	98.7	95.8	93.2	86.7	95.9	90	90.4	High	High	High	High	High	High	High	High	High
FALSE	High	Master Protein	Q9JJK2	LanC-like protein 2 OS=Mus musculus OX=10090 GN=Lancl2 PE=1 SV=1	0	95.464	30	9	40	9	1	450	50.7	7.28	166.67	9	0	0.01	1.19	1.01	1.143	1.083	1.122	1.171	1.045	102.7		122.2	103.7	117.4	111.3	115.2	120.3	107.3	High	High	High	High	High	High	High	High	High
FALSE	High	Master Protein	P68510	14-3-3 protein eta OS=Mus musculus OX=10090 GN=Ywhah PE=1 SV=2	0	95.128	56	15	48	11	1	246	28.2	4.89	139.86	15	1	0.209	1.303	1.213	1.324	1.312	1.267	1.335	1.332	87.4	18.3	113.9	106.1	115.7	114.7	110.8	116.7	116.5	High	High	High	High	High	High	High	High	High
FALSE	High	Master Protein	Q6GYP7	Ral GTPase-activating protein subunit alpha-1 OS=Mus musculus OX=10090 GN=Ralgapa1 PE=1 SV=1	0	94.594	10	16	31	14	1	2035	229.2	6.1	83.21	16	2	0.823	0.987	1.054	1.052	1.082	1.041	0.988	1.054	99.1	81.6	97.8	104.5	104.3	107.2	103.1	97.9	104.4	High	High	High	High	High	High	High	High	High
FALSE	High	Master Protein	Q9Z140	Copine-6 OS=Mus musculus OX=10090 GN=Cpne6 PE=1 SV=1	0	93.613	38	18	38	17	1	557	61.7	5.59	108.22	18	1	0.01	1.235	0.996	1.269	1.03	1.312	1.237	1.096	98.1		121.1	97.7	124.5	101.1	128.7	121.3	107.5	High	Not Found	High	High	High	High	High	High	High
FALSE	High	Master Protein	P28660	Nck-associated protein 1 OS=Mus musculus OX=10090 GN=Nckap1 PE=1 SV=2	0	93.549	16	15	30	15	1	1128	128.7	6.62	94.91	15	0	1.255	1.14	1.286	1.253	1.437	1.268	1.236	1.339	80.3	100.7	91.5	103.2	100.6	115.4	101.7	99.2	107.5	High	High	High	High	High	High	High	High	High
FALSE	High	Master Protein	P40124	Adenylyl cyclase-associated protein 1 OS=Mus musculus OX=10090 GN=Cap1 PE=1 SV=4	0	92.648	42	12	27	12	1	474	51.5	7.52	95.63	12	0	0.672	1.429	0.941	1.43	0.971	1.387	1.285	0.972	89.2	60	127.5	84	127.6	86.6	123.7	114.6	86.8	High	High	High	High	High	High	High	High	High
FALSE	High	Master Protein	P80314	T-complex protein 1 subunit beta OS=Mus musculus OX=10090 GN=Cct2 PE=1 SV=4	0	92.447	33	13	31	13	1	535	57.4	6.4	104.51	13	0	0.604	1.071	1.167	1.184	1.31	1.09	1.068	1.258	92.3	55.8	98.8	107.7	109.3	120.9	100.5	98.6	116.1	High	High	High	High	High	High	High	High	High
FALSE	High	Master Protein	Q922B2	Aspartate--tRNA ligase, cytoplasmic OS=Mus musculus OX=10090 GN=Dars PE=1 SV=2	0	92.046	34	17	35	17	1	501	57.1	6.49	102.16	17	0	0.966	1.01	1.102	1.029	1.069	1.078	0.941	1.027	97.6	94.3	98.6	107.5	100.4	104.3	105.2	91.9	100.3	High	High	High	High	High	High	High	High	High
FALSE	High	Master Protein	P09103	Protein disulfide-isomerase OS=Mus musculus OX=10090 GN=P4hb PE=1 SV=2	0	91.63	30	12	31	12	1	509	57	4.88	110.28	12	0	3.57	0.895	0.826	0.806	0.715	0.937	0.933	0.903	85	303.6	76.1	70.2	68.5	60.8	79.7	79.4	76.8	High	High	High	High	High	High	High	High	High
FALSE	High	Master Protein	Q8BGN8	Synaptoporin OS=Mus musculus OX=10090 GN=Synpr PE=1 SV=1	0	91.337	36	8	77	7	1	265	29.2	6.3	258.7	8	0	0.176	0.836	0.632	0.897	0.675	0.91	0.884	0.691	134.3	23.6	112.3	84.9	120.4	90.7	122.2	118.8	92.8	High	High	High	High	High	High	High	High	High
FALSE	High	Master Protein	Q2M3X8	Phosphatase and actin regulator 1 OS=Mus musculus OX=10090 GN=Phactr1 PE=1 SV=1	0	90.654	26	15	41	15	1	580	66.2	6.96	120.17	15	0	0.456	1.112	1.231	1.2	1.359	1.18	1.119	1.288	90.5	41.3	100.6	111.4	108.6	123	106.8	101.3	116.5	High	High	High	High	High	High	High	High	High
FALSE	High	Master Protein	Q9R1T4	Septin-6 OS=Mus musculus OX=10090 GN=Sept6 PE=1 SV=4	0	90.564	33	12	26	7	1	434	49.6	6.43	100.59	12	4	0.495	1.162	1.061	1.16	1.062	1.187	1.132	1.077	96.4	47.7	112.1	102.3	111.8	102.4	114.4	109.1	103.8	High	High	High	High	High	High	High	High	High
FALSE	High	Master Protein	P39054	Dynamin-2 OS=Mus musculus OX=10090 GN=Dnm2 PE=1 SV=2	0	90.042	17	16	109	3	1	870	98.1	7.43	318.23	16	0	0.01	0.587	0.788	0.604	0.744	0.688	0.519	0.739	158.8		93.1	125.1	96	118.1	109.2	82.3	117.4	High	Not Found	High	High	High	High	High	High	High
FALSE	High	Master Protein	Q9Z2Q6	Septin-5 OS=Mus musculus OX=10090 GN=Sept5 PE=1 SV=2	0	89.957	33	12	49	11	1	369	42.7	6.67	171.79	12	1	0.01	1.202	1.338	1.244	1.494	1.148	1.239	1.43	89.2		107.2	119.3	110.9	133.2	102.3	110.5	127.5	High	High	High	High	High	High	High	High	High
FALSE	High	Master Protein	Q8CC35	Synaptopodin OS=Mus musculus OX=10090 GN=Synpo PE=1 SV=2	0	89.919	22	12	25	12	1	929	99.5	9.42	105.55	12	0	1.579	0.363	0.361	0.378	0.427	0.399	0.364	0.43	169.8	268	61.7	61.2	64.2	72.6	67.7	61.8	73	High	High	High	High	High	High	High	High	High
FALSE	High	Master Protein	Q812A2	SLIT-ROBO Rho GTPase-activating protein 3 OS=Mus musculus OX=10090 GN=Srgap3 PE=1 SV=1	0	89.91	16	15	26	13	1	1099	124.3	6.67	90.17	15	0	0.01	1.225	1.314	1.195	1.399	1.223	1.157	1.299	91.7		112.4	120.5	109.6	128.3	112.2	106.1	119.1	High	High	High	High	High	High	High	High	High
FALSE	High	Master Protein	Q9DBS2	Tumor protein p63-regulated gene 1-like protein OS=Mus musculus OX=10090 GN=Tprg1l PE=1 SV=1	0	89.362	53	10	45	10	1	266	29.8	7.37	188.12	10	0	0.01	1.329	0.876	1.433	0.967	1.13	1.447	0.956	98.5		130.9	86.3	141.1	95.2	111.3	142.5	94.2	High	High	High	High	High	High	High	High	High
FALSE	High	Master Protein	B2RQC6	CAD protein OS=Mus musculus OX=10090 GN=Cad PE=1 SV=1	0	89.229	12	19	36	19	1	2225	243.1	6.43	96.44	19	0	1.258	1.06	1.166	1.148	1.222	1.02	1.014	1.202	89.2	112.2	94.5	104	102.4	109	91	90.4	107.2	High	High	High	High	High	High	High	High	High
FALSE	High	Master Protein	Q6P9K8	Caskin-1 OS=Mus musculus OX=10090 GN=Caskin1 PE=1 SV=2	0	89.004	15	14	24	14	1	1431	150.4	9.17	75.23	14	0	0.01	0.352	0.35	0.349	0.367	0.374	0.353	0.387	254.8		89.7	89.3	88.9	93.5	95.3	89.9	98.6	High	High	High	High	High	High	High	High	High
FALSE	High	Master Protein	Q5SQX6	Cytoplasmic FMR1-interacting protein 2 OS=Mus musculus OX=10090 GN=Cyfip2 PE=1 SV=2	0	88.514	13	17	51	8	1	1253	145.6	7.05	129.42	17	6	0.69	0.939	0.933	0.967	1.027	0.937	0.905	0.961	107.7	74.3	101.1	100.4	104.1	110.5	100.9	97.4	103.5	High	Not Found	High	High	High	High	High	High	High
FALSE	High	Master Protein	Q8VD37	SH3-containing GRB2-like protein 3-interacting protein 1 OS=Mus musculus OX=10090 GN=Sgip1 PE=1 SV=1	0	88.346	19	11	27	11	1	806	86	7.87	122.23	11	0	0.613	1.353	1.166	1.445	1.172	1.438	1.425	1.171	83.5	51.2	113	97.3	120.6	97.8	120	118.9	97.8	High	High	High	High	High	High	High	High	High
FALSE	High	Master Protein	Q9WV80	Sorting nexin-1 OS=Mus musculus OX=10090 GN=Snx1 PE=1 SV=1	0	88.25	25	12	32	11	1	522	58.9	5.22	83.46	12	1	0.274	1.239	0.975	1.21	0.93	1.08	1.128	0.984	102	28	126.4	99.5	123.4	94.9	110.2	115.1	100.4	High	High	High	High	High	High	High	High	High
FALSE	High	Master Protein	O08919	Numb-like protein OS=Mus musculus OX=10090 GN=Numbl PE=1 SV=3	0	87.946	21	15	51	8	1	604	64.1	8.82	149.8	15	2	3.257	1.02	0.888	1.065	0.936	1.061	1.005	0.882	81	263.8	82.6	71.9	86.2	75.8	85.9	81.4	71.4	High	High	High	High	High	High	High	High	High
FALSE	High	Master Protein	Q80SW1	S-adenosylhomocysteine hydrolase-like protein 1 OS=Mus musculus OX=10090 GN=Ahcyl1 PE=1 SV=1	0	87.845	35	16	37	7	1	530	58.9	6.89	110.57	16	6	0.4	1.172	1.164	1.257	1.192	1.206	1.233	1.184	91.8	36.7	107.6	106.8	115.3	109.4	110.6	113.2	108.6	High	Not Found	High	High	High	High	High	High	High
FALSE	High	Master Protein	Q8CBE3	WD repeat-containing protein 37 OS=Mus musculus OX=10090 GN=Wdr37 PE=1 SV=1	0	87.701	25	15	66	15	1	496	55	7.23	204.13	15	0	0.293	1.342	1.497	1.501	1.498	1.391	1.309	1.432	79.9	23.4	107.3	119.7	119.9	119.7	111.2	104.6	114.4	High	High	High	High	High	High	High	High	High
FALSE	High	Master Protein	Q6NZL0	Protein SOGA3 OS=Mus musculus OX=10090 GN=Soga3 PE=1 SV=2	0	87.519	21	16	24	14	1	945	103.4	6.14	73.78	16	2	0.828	0.754	0.709	0.761	0.769	0.774	0.696	0.756	127.7	105.7	96.3	90.5	97.2	98.2	98.8	88.9	96.6	High	High	High	High	High	High	High	High	High
FALSE	High	Master Protein	Q99JY9	Actin-related protein 3 OS=Mus musculus OX=10090 GN=Actr3 PE=1 SV=3	0	87.467	33	12	34	12	1	418	47.3	5.88	127.89	12	0	0.265	1.289	1.186	1.355	1.249	1.361	1.287	1.239	88	23.3	113.4	104.3	119.2	109.9	119.7	113.2	109	High	High	High	High	High	High	High	High	High
FALSE	High	Master Protein	Q922D8	C-1-tetrahydrofolate synthase, cytoplasmic OS=Mus musculus OX=10090 GN=Mthfd1 PE=1 SV=4	0	87.453	19	16	34	16	1	935	101.1	7.14	103.7	16	0	0.41	1.169	1.372	1.171	1.416	1.174	1.078	1.375	88.5	36.3	103.5	121.5	103.7	125.4	104	95.4	121.7	High	High	High	High	High	High	High	High	High
FALSE	High	Master Protein	O70318	Band 4.1-like protein 2 OS=Mus musculus OX=10090 GN=Epb41l2 PE=1 SV=2	0	87.396	21	13	15	12	1	988	109.9	5.43	60.8	13	0	0.332	0.971	0.967	0.924	1.033	0.931	0.912	0.942	112.3	37.3	109	108.6	103.8	116	104.6	102.5	105.8	High	High	High	High	High	High	High	High	High
FALSE	High	Master Protein	O08532	Voltage-dependent calcium channel subunit alpha-2/delta-1 OS=Mus musculus OX=10090 GN=Cacna2d1 PE=1 SV=1	0	87.381	14	13	33	13	1	1103	124.6	5.3	101.51	13	0	1.115	1.044	1.035	1.069	1.083	1.038	1.039	1.105	94.5	105.3	98.6	97.8	100.9	102.3	98.1	98.2	104.4	High	High	High	High	High	High	High	High	High
FALSE	High	Master Protein	E9PUL5	Proline-rich transmembrane protein 2 OS=Mus musculus OX=10090 GN=Prrt2 PE=1 SV=1	0	86.81	37	9	30	9	1	346	35.9	4.63	148.69	9	0	1.056	1.407	1.136	1.598	0.881	1.23	1.485	1.215	81.8	86.3	115	92.9	130.6	72	100.6	121.4	99.4	High	High	High	High	High	High	High	High	High
FALSE	High	Master Protein	Q3UU96	Serine/threonine-protein kinase MRCK alpha OS=Mus musculus OX=10090 GN=Cdc42bpa PE=1 SV=2	0	86.756	13	18	24	16	1	1719	195.4	6.51	65.46	18	0	0.01	0.996	1.012	1.073	1.047	1.04	0.983	1.121	108.8		108.3	110.1	116.7	113.9	113.2	106.9	122	High	High	High	High	High	High	High	High	High
FALSE	High	Master Protein	P16054	Protein kinase C epsilon type OS=Mus musculus OX=10090 GN=Prkce PE=1 SV=1	0	86.529	22	17	27	16	1	737	83.5	7.03	86.3	17	0	0.527	1.128	0.908	1.075	0.975	1.129	1	1.002	102.9	54.3	116.1	93.4	110.7	100.4	116.2	102.9	103.1	High	High	High	High	High	High	High	High	High
FALSE	High	Master Protein	P35276	Ras-related protein Rab-3D OS=Mus musculus OX=10090 GN=Rab3d PE=1 SV=1	0	86.193	47	10	111	1	1	219	24.4	4.93	354.6	10	0																		High	High	High	High	High	High	High	High	High
FALSE	High	Master Protein	P62334	26S proteasome regulatory subunit 10B OS=Mus musculus OX=10090 GN=Psmc6 PE=1 SV=1	0	86.036	47	15	26	15	1	389	44.1	7.49	80.03	15	0	1.568	0.96	1.053	1.041	1.155	1.006	0.953	1.172	90.8	142.4	87.2	95.6	94.5	104.9	91.4	86.6	106.5	High	High	High	High	High	High	High	High	High
FALSE	High	Master Protein	Q02819	Nucleobindin-1 OS=Mus musculus OX=10090 GN=Nucb1 PE=1 SV=2	0	85.897	37	13	19	13	1	459	53.4	5.07	68.4	13	0	0.01	1.068	0.99	1.077	1.026	1.13	1.102	1.109	105.9		113	104.8	114.1	108.6	119.6	116.7	117.4	High	Not Found	High	High	High	High	High	High	High
FALSE	High	Master Protein	P62259	14-3-3 protein epsilon OS=Mus musculus OX=10090 GN=Ywhae PE=1 SV=1	0	85.72	52	13	53	11	1	255	29.2	4.74	158.32	13	0	0.01	1.096	1.075	1.061	1.061	1.044	1.078	1.105	105.6		115.7	113.5	112.1	112.1	110.3	113.9	116.7	High	High	High	High	High	High	High	High	High
FALSE	High	Master Protein	P61982	14-3-3 protein gamma OS=Mus musculus OX=10090 GN=Ywhag PE=1 SV=2	0	85.027	52	13	67	7	1	247	28.3	4.89	200.79	13	0	0.177	1.448	1.384	0.915	0.886	0.877	0.904	1.447	99.6	17.6	144.2	137.8	91.2	88.2	87.3	90	144.1	High	High	High	High	High	High	High	High	High
FALSE	High	Master Protein	Q9WUB3	Glycogen phosphorylase, muscle form OS=Mus musculus OX=10090 GN=Pygm PE=1 SV=3	0	84.62	21	18	46	13	1	842	97.2	7.11	117.33	18	0	0.01	1.198	1.145	1.167	1.272	1.127	1.062	1.141	98.8		118.3	113.1	115.3	125.6	111.3	104.9	112.8	High	Not Found	High	High	High	High	High	High	High
FALSE	High	Master Protein	Q9R0N5	Synaptotagmin-5 OS=Mus musculus OX=10090 GN=Syt5 PE=1 SV=1	0	84.581	24	9	128	5	1	386	43.1	9.6	388.73	9	0	0.01	1.023	0.897	1.086	0.969	1.114	1.032	0.98	111.1		113.7	99.7	120.7	107.7	123.8	114.6	108.8	High	Not Found	High	High	High	High	High	High	High
FALSE	High	Master Protein	Q60605	Myosin light polypeptide 6 OS=Mus musculus OX=10090 GN=Myl6 PE=1 SV=3	0	84.533	67	10	152	8	1	151	16.9	4.65	453.29	10	2	1.582	1.015	1.374	1.039	1.246	1.062	0.954	1.3	85.1	134.6	86.4	117	88.4	106.1	90.4	81.2	110.6	High	High	High	High	High	High	High	High	High
FALSE	High	Master Protein	P68254	14-3-3 protein theta OS=Mus musculus OX=10090 GN=Ywhaq PE=1 SV=1	0	84.504	54	12	41	9	1	245	27.8	4.78	126.49	12	0	2.986	1.101	1.178	1.15	1.106	1.088	1.144	1.157	75.6	225.7	83.2	89	86.9	83.6	82.2	86.5	87.4	High	High	High	High	High	High	High	High	High
FALSE	High	Master Protein	P59644	Phosphatidylinositol 4,5-bisphosphate 5-phosphatase A OS=Mus musculus OX=10090 GN=Inpp5j PE=1 SV=2	0	84.252	19	10	23	10	1	1003	107.5	9.36	92.84	10	0	0.552	1.26	1.009	1.189	0.912	1.143	1.195	0.89	98.3	54.3	123.9	99.3	116.9	89.7	112.4	117.5	87.6	High	High	High	High	High	High	High	High	High
FALSE	High	Master Protein	P06151	L-lactate dehydrogenase A chain OS=Mus musculus OX=10090 GN=Ldha PE=1 SV=3	0	84.195	33	11	38	9	1	332	36.5	7.74	126.96	11	0	0.01	1.413	1.586	1.468	1.499	1.399	1.31	1.418	81.1		114.6	128.6	119.1	121.6	113.5	106.3	115.1	High	Not Found	High	High	High	High	High	High	High
FALSE	High	Master Protein	Q6ZPQ6	Membrane-associated phosphatidylinositol transfer protein 2 OS=Mus musculus OX=10090 GN=Pitpnm2 PE=1 SV=2	0	84.127	13	14	35	13	1	1335	147.9	7.93	111.37	14	0	1.358	0.948	0.936	0.969	0.982	0.949	0.919	0.949	99.9	135.6	94.7	93.5	96.8	98.1	94.8	91.8	94.8	High	High	High	High	High	High	High	High	High
FALSE	High	Master Protein	Q8CH72	E3 ubiquitin-protein ligase TRIM32 OS=Mus musculus OX=10090 GN=Trim32 PE=1 SV=2	0	84.08	31	16	22	16	1	655	72	6.9	73.02	16	0	5.03	0.782	0.962	0.86	0.992	0.864	0.786	0.976	73.5	369.5	57.4	70.7	63.2	72.9	63.5	57.7	71.7	High	High	High	High	High	High	High	High	High
FALSE	High	Master Protein	Q9R1L5	Microtubule-associated serine/threonine-protein kinase 1 OS=Mus musculus OX=10090 GN=Mast1 PE=1 SV=3	0	83.772	14	15	27	13	1	1570	170.9	8.44	80.71	15	1	3.809	0.92	0.921	0.931	1.028	0.871	0.878	0.937	79.7	303.5	73.3	73.4	74.2	81.9	69.4	70	74.7	High	High	High	High	High	High	High	High	High
FALSE	High	Master Protein	Q6PGE7	Sodium-dependent proline transporter OS=Mus musculus OX=10090 GN=Slc6a7 PE=1 SV=1	0	83.637	14	7	42	7	1	637	71	6.61	132.94	7	0	0.631	1.151	0.938	1.085	0.943	1.087	1.091	0.875	102.3	64.5	117.7	95.9	110.9	96.4	111.1	111.6	89.5	High	High	High	High	High	High	High	High	High
FALSE	High	Master Protein	Q99N28	Cell adhesion molecule 3 OS=Mus musculus OX=10090 GN=Cadm3 PE=1 SV=1	0	83.575	25	8	19	8	1	396	42.9	5.8	77.37	8	0	0.01	1.055	0.943	0.993	0.973	1.079	1.069	1.057	110.2		116.2	103.9	109.4	107.2	118.9	117.8	116.4	High	High	High	High	High	High	High	High	High
FALSE	High	Master Protein	P08752	Guanine nucleotide-binding protein G(i) subunit alpha-2 OS=Mus musculus OX=10090 GN=Gnai2 PE=1 SV=5	0	83.494	42	12	45	7	1	355	40.5	5.45	148.19	12	3	1.025	0.983	0.928	0.952	0.941	1.004	0.966	1.006	102.2	104.8	100.5	94.8	97.3	96.1	102.6	98.8	102.8	High	High	High	High	High	High	High	High	High
FALSE	High	Master Protein	Q6PHN9	Ras-related protein Rab-35 OS=Mus musculus OX=10090 GN=Rab35 PE=1 SV=1	0	83.423	62	13	85	10	1	201	23	8.29	260.76	13	0	1.357	1.049	0.862	1.071	0.867	1.011	1.059	0.908	98	133	102.8	84.5	104.9	85	99.1	103.7	88.9	High	High	High	High	High	High	High	High	High
FALSE	High	Master Protein	O35295	Transcriptional activator protein Pur-beta OS=Mus musculus OX=10090 GN=Purb PE=1 SV=3	0	83.164	61	12	28	11	1	324	33.9	5.43	91	12	0	0.01	1.279	1.106	1.209	0.93	1.427	1.258	1.171	95.9		122.7	106.1	116	89.2	136.9	120.7	112.3	High	High	High	High	High	High	High	High	High
FALSE	High	Master Protein	Q8BXK8	Arf-GAP with GTPase, ANK repeat and PH domain-containing protein 1 OS=Mus musculus OX=10090 GN=Agap1 PE=1 SV=1	0	82.941	20	13	27	8	1	857	94.4	7.94	88	13	4	1.873	0.893	0.925	0.879	0.895	0.929	0.856	0.87	98.7	184.8	88.1	91.3	86.7	88.3	91.7	84.5	85.8	High	High	High	High	High	High	High	High	High
FALSE	High	Master Protein	P43006	Excitatory amino acid transporter 2 OS=Mus musculus OX=10090 GN=Slc1a2 PE=1 SV=1	0	82.831	15	9	34	9	1	572	62	6.68	138.5	9	0	0.115	1.295	1.218	1.297	1.353	1.215	1.374	1.242	89	10.2	115.3	108.5	115.4	120.5	108.2	122.4	110.6	High	High	High	High	High	High	High	High	High
FALSE	High	Master Protein	Q9Z218	Dipeptidyl aminopeptidase-like protein 6 OS=Mus musculus OX=10090 GN=Dpp6 PE=1 SV=1	0	82.481	24	20	76	19	1	804	91.2	6.68	203.81	20	1	0.344	1.26	0.959	1.161	0.953	1.082	1.207	1.01	100.3	34.5	126.3	96.1	116.4	95.5	108.5	121	101.3	High	High	High	High	High	High	High	High	High
FALSE	High	Master Protein	P14685	26S proteasome non-ATPase regulatory subunit 3 OS=Mus musculus OX=10090 GN=Psmd3 PE=1 SV=3	0	82.37	33	16	46	16	1	530	60.7	8.44	119.5	16	0	1.078	1.18	1.222	1.177	1.232	1.138	1.066	1.171	87.7	94.5	103.5	107.1	103.2	108	99.8	93.5	102.7	High	High	High	High	High	High	High	High	High
FALSE	High	Master Protein	Q99NE5	Regulating synaptic membrane exocytosis protein 1 OS=Mus musculus OX=10090 GN=Rims1 PE=1 SV=2	0	82.06	12	15	34	14	1	1463	163.1	9.42	105.47	15	0	0.43	0.737	0.758	0.76	0.786	0.851	0.714	0.807	131.5	56.5	96.9	99.6	100	103.4	111.9	93.9	106.2	High	High	High	High	High	High	High	High	High
FALSE	High	Master Protein	P01864	Ig gamma-2A chain C region secreted form OS=Mus musculus OX=10090 PE=1 SV=1	0	81.948	18	6	68	4	1	335	36.6	8.22	289.53	6	0	0.01	0.221	0.218	0.211	0.279	0.236	0.205	0.248	343.8		76	74.9	72.6	96	81.1	70.4	85.3	High	Not Found	High	High	High	High	High	High	High
FALSE	High	Master Protein	Q9QZS3	Protein numb homolog OS=Mus musculus OX=10090 GN=Numb PE=1 SV=1	0	81.847	26	15	40	8	1	653	70.8	8.65	118.12	15	0	0.01	0.796	0.804	0.724	0.851	0.773	0.695	0.829	139.1		110.7	111.8	100.7	118.4	107.5	96.6	115.3	High	High	High	High	High	High	High	High	High
FALSE	High	Master Protein	Q8VHJ5	Serine/threonine-protein kinase MARK1 OS=Mus musculus OX=10090 GN=Mark1 PE=1 SV=2	0	81.186	20	14	37	11	1	795	88.3	9.39	118.3	14	2	0.219	0.744	0.682	0.75	0.733	0.75	0.73	0.686	143	31.3	106.3	97.5	107.2	104.8	107.2	104.4	98.2	High	High	High	High	High	High	High	High	High
FALSE	High	Master Protein	Q60673	Receptor-type tyrosine-protein phosphatase-like N OS=Mus musculus OX=10090 GN=Ptprn PE=1 SV=2	0	81.051	15	10	17	10	1	979	106	7.09	82.03	10	0	0.979	1.134	1.048	1.167	1.115	1.206	1.185	1.164	90	88.1	102.1	94.3	105	100.3	108.6	106.7	104.8	High	High	High	High	High	High	High	High	High
FALSE	High	Master Protein	P62761	Visinin-like protein 1 OS=Mus musculus OX=10090 GN=Vsnl1 PE=1 SV=2	0	80.962	69	14	39	13	1	191	22.1	5.15	132.56	14	1	0.01	1.474	1.446	1.45	1.389	1.435	1.558	1.46	80.3		118.3	116	116.4	111.5	115.2	125.1	117.2	High	Not Found	High	High	High	High	High	High	High
FALSE	High	Master Protein	P53994	Ras-related protein Rab-2A OS=Mus musculus OX=10090 GN=Rab2a PE=1 SV=1	0	80.877	48	10	47	4	1	212	23.5	6.54	167.81	10	3	0.155	0.952	0.775	0.957	0.771	0.931	0.973	0.765	123.6	19.1	117.7	95.8	118.3	95.3	115.1	120.3	94.6	High	Not Found	High	High	High	High	High	High	High
FALSE	High	Master Protein	Q6PH08	ERC protein 2 OS=Mus musculus OX=10090 GN=Erc2 PE=1 SV=2	0	80.872	18	16	25	14	1	957	110.6	7.03	75.05	16	1	1.465	0.91	0.885	0.932	0.876	0.945	0.9	0.912	102	149.4	92.8	90.2	95	89.3	96.4	91.8	93	High	High	High	High	High	High	High	High	High
FALSE	High	Master Protein	Q6IRU5	Clathrin light chain B OS=Mus musculus OX=10090 GN=Cltb PE=1 SV=1	0	80.645	42	13	54	13	1	229	25.2	4.63	197.22	13	0	0.127	1.029	1.035	1.016	1.051	0.991	1.032	1.103	107.3	13.6	110.5	111.1	109.1	112.8	106.4	110.7	118.4	High	High	High	High	High	High	High	High	High
FALSE	High	Master Protein	P99027	60S acidic ribosomal protein P2 OS=Mus musculus OX=10090 GN=Rplp2 PE=1 SV=3	0	80.581	84	6	30	6	1	115	11.6	4.54	122.81	6	0	0.01	0.617	0.553	0.586	0.495	0.603	0.624	0.571	178.3		109.9	98.6	104.5	88.3	107.4	111.3	101.8	High	Not Found	High	High	High	High	High	High	High
FALSE	High	Master Protein	Q8BP92	Reticulocalbin-2 OS=Mus musculus OX=10090 GN=Rcn2 PE=1 SV=1	0	80.417	37	11	28	11	1	320	37.2	4.42	91.91	11	0	0.01	0.818	0.701	0.809	0.766	0.836	0.718	0.815	139.2		113.9	97.7	112.7	106.7	116.4	99.9	113.5	High	Not Found	High	High	High	High	High	High	High
FALSE	High	Master Protein	P27671	Ras-specific guanine nucleotide-releasing factor 1 OS=Mus musculus OX=10090 GN=Rasgrf1 PE=1 SV=2	0	80.2	15	16	34	15	1	1262	144	7.17	98.74	16	1	0.01	1.003	1.059	0.983	1.094	1.027	0.986	1.032	110		110.3	116.5	108.1	120.3	112.9	108.5	113.4	High	Not Found	High	High	High	High	High	High	High
FALSE	High	Master Protein	P10637	Microtubule-associated protein tau OS=Mus musculus OX=10090 GN=Mapt PE=1 SV=3	0	79.989	24	16	50	16	1	733	76.2	6.79	148	16	0	1.205	1.388	1.329	1.234	1.269	1.321	1.385	1.366	78.3	94.3	108.7	104	96.6	99.3	103.4	108.4	106.9	High	High	High	High	High	High	High	High	High
FALSE	High	Master Protein	Q03141	MAP/microtubule affinity-regulating kinase 3 OS=Mus musculus OX=10090 GN=Mark3 PE=1 SV=2	0	79.876	19	13	26	10	1	753	84.3	9.51	81.3	13	0	1.111	0.784	0.701	0.765	0.8	0.831	0.788	0.743	119.6	132.9	93.8	83.9	91.5	95.7	99.4	94.3	88.9	High	High	High	High	High	High	High	High	High
FALSE	High	Master Protein	P31324	cAMP-dependent protein kinase type II-beta regulatory subunit OS=Mus musculus OX=10090 GN=Prkar2b PE=1 SV=3	0	79.797	39	12	27	12	1	416	46.1	4.98	74.83	12	0	0.01	1	0.858	1.01	0.927	0.951	0.988	0.881	118.2		118.2	101.4	119.3	109.6	112.4	116.7	104.1	High	High	High	High	High	High	High	High	High
FALSE	High	Master Protein	D3YVF0	A-kinase anchor protein 5 OS=Mus musculus OX=10090 GN=Akap5 PE=1 SV=2	0	79.752	32	10	20	10	1	745	79.4	4.75	80.32	10	0	0.01	1.011	0.938	1.077	1.158	1.027	1.059	1.142	107		108.2	100.4	115.2	123.9	109.9	113.3	122.2	High	High	High	High	High	High	High	High	High
FALSE	High	Master Protein	Q8K212	Phosphofurin acidic cluster sorting protein 1 OS=Mus musculus OX=10090 GN=Pacs1 PE=1 SV=2	0	79.651	21	13	31	13	1	961	104.8	7.74	95.34	13	0	0.411	0.997	1.093	1.034	1.141	1.05	0.97	1.084	102.5	42.1	102.2	112	106	116.9	107.6	99.5	111.1	High	High	High	High	High	High	High	High	High
FALSE	High	Master Protein	Q8R366	Immunoglobulin superfamily member 8 OS=Mus musculus OX=10090 GN=Igsf8 PE=1 SV=2	0	79.645	16	8	18	8	1	611	65	7.99	73.66	8	0	1.13	0.984	1.67	0.969	1.778	1	0.943	1.718	80.4	90.9	79.1	134.3	77.9	143	80.4	75.8	138.2	High	High	High	High	High	High	High	High	High
FALSE	High	Master Protein	P47757	F-actin-capping protein subunit beta OS=Mus musculus OX=10090 GN=Capzb PE=1 SV=3	0	79.55	42	12	22	12	1	277	31.3	5.74	71.83	12	0	1.254	0.968	0.85	0.883	0.787	0.86	0.886	0.774	108.9	136.6	105.4	92.6	96.2	85.8	93.6	96.5	84.3	High	High	High	High	High	High	High	High	High
FALSE	High	Master Protein	Q8R5H6	Wiskott-Aldrich syndrome protein family member 1 OS=Mus musculus OX=10090 GN=Wasf1 PE=1 SV=2	0	79.545	22	10	23	9	1	559	61.5	6.37	89.8	10	0	0.626	0.927	0.943	0.884	0.931	0.934	0.873	0.964	111.4	69.7	103.2	105	98.4	103.7	104	97.2	107.4	High	High	High	High	High	High	High	High	High
FALSE	High	Master Protein	Q8BH66	Atlastin-1 OS=Mus musculus OX=10090 GN=Atl1 PE=1 SV=1	0	79.538	24	12	24	11	1	558	63.3	6.49	86.38	12	0	0.01	0.751	0.704	0.792	0.784	0.837	0.752	0.724	141.9		106.5	99.9	112.4	111.2	118.7	106.7	102.8	High	High	High	High	High	High	High	High	High
FALSE	High	Master Protein	Q8R307	Vacuolar protein sorting-associated protein 18 homolog OS=Mus musculus OX=10090 GN=Vps18 PE=1 SV=2	0	79.198	16	12	18	12	1	973	110.1	6.09	59.74	12	0	0.01	1.243	1.132	1.216	1.131	1.241	1.219	1.081	97.1		120.8	110	118.2	109.9	120.6	118.4	105	High	Not Found	High	High	High	High	High	High	High
FALSE	High	Master Protein	Q3TLI0	Trafficking protein particle complex subunit 10 OS=Mus musculus OX=10090 GN=Trappc10 PE=1 SV=2	0	79.034	14	15	22	15	1	1259	141.5	5.96	66.63	15	0	0.01	1.137	0.922	1.097	0.977	1.054	1.095	0.974	109		124	100.5	119.5	106.5	114.9	119.4	106.2	High	High	High	High	High	High	High	High	High
FALSE	High	Master Protein	Q920N7	Synaptotagmin-12 OS=Mus musculus OX=10090 GN=Syt12 PE=1 SV=1	0	78.943	31	12	87	12	1	421	46.7	5.64	225.06	12	0	0.237	1.155	0.813	1.046	0.764	1.071	1.09	0.828	112.4	26.6	129.9	91.4	117.6	86	120.4	122.5	93.1	High	High	High	High	High	High	High	High	High
FALSE	High	Master Protein	P42859	Huntingtin OS=Mus musculus OX=10090 GN=Htt PE=1 SV=2	0	78.901	8	18	30	18	1	3119	344.5	6.29	68.9	18	0	0.01	1.175	1.204	1.237	1.246	1.125	1.18	1.205	96		112.8	115.6	118.8	119.6	108	113.4	115.7	High	Not Found	High	High	High	High	High	High	High
FALSE	High	Master Protein	Q8BXR1	Probable cationic amino acid transporter OS=Mus musculus OX=10090 GN=Slc7a14 PE=1 SV=1	0	78.697	18	8	29	8	1	771	83.9	5.35	92.5	8	0	0.01	1.095	0.87	1.164	0.916	1.11	1.195	1.056	107.1		117.2	93.2	124.6	98	118.9	128	113.1	High	High	High	High	High	High	High	High	High
FALSE	High	Master Protein	P30275	Creatine kinase U-type, mitochondrial OS=Mus musculus OX=10090 GN=Ckmt1 PE=1 SV=1	0	78.632	26	11	50	9	1	418	47	8.16	144.33	11	2	4.784	1.011	0.961	1.041	1.07	1.051	1.008	1.002	69.6	333	70.4	66.9	72.5	74.5	73.1	70.2	69.7	High	High	High	High	High	High	High	High	High
FALSE	High	Master Protein	Q3U0M1	Trafficking protein particle complex subunit 9 OS=Mus musculus OX=10090 GN=Trappc9 PE=1 SV=2	0	78.359	16	18	47	18	1	1148	128.2	6.47	115.11	18	0	0.487	0.975	0.714	0.898	0.72	0.868	0.907	0.721	123.4	60.1	120.4	88.2	110.9	88.9	107.2	112	89	High	High	High	High	High	High	High	High	High
FALSE	High	Master Protein	P60122	RuvB-like 1 OS=Mus musculus OX=10090 GN=Ruvbl1 PE=1 SV=1	0	78.064	22	6	20	6	1	456	50.2	6.42	76.63	6	0	0.01	1.242	1.487	1.355	1.648	1.209	1.175	1.468	85		105.6	126.5	115.2	140.1	102.8	99.9	124.9	High	Not Found	High	High	High	High	High	High	High
FALSE	High	Master Protein	O70439	Syntaxin-7 OS=Mus musculus OX=10090 GN=Stx7 PE=1 SV=3	0	77.756	46	10	45	10	1	261	29.8	5.78	177.07	10	0	0.475	1.159	1.064	1.196	1.146	1.144	1.193	1.106	94.9	45.1	110	101	113.5	108.7	108.6	113.2	104.9	High	High	High	High	High	High	High	High	High
FALSE	High	Master Protein	P37040	NADPH--cytochrome P450 reductase OS=Mus musculus OX=10090 GN=Por PE=1 SV=2	0	77.74	19	13	22	13	1	678	77	5.53	66.08	13	0	0.759	0.843	0.69	0.858	0.753	0.863	0.794	0.755	123	93.4	103.7	84.9	105.5	92.7	106.2	97.7	92.9	High	High	High	High	High	High	High	High	High
FALSE	High	Master Protein	O54983	Ketimine reductase mu-crystallin OS=Mus musculus OX=10090 GN=Crym PE=1 SV=1	0	77.653	38	11	40	11	1	313	33.5	5.67	118.31	11	0	0.01	1.232	1.621	1.311	1.626	1.26	1.156	1.555	83.6		103	135.5	109.7	136	105.4	96.7	130.1	High	High	High	High	High	High	High	High	High
FALSE	High	Master Protein	P62082	40S ribosomal protein S7 OS=Mus musculus OX=10090 GN=Rps7 PE=2 SV=1	0	77.471	45	12	48	12	1	194	22.1	10.1	164.28	12	0	0.774	0.269	0.249	0.262	0.283	0.295	0.253	0.255	247.3	191.4	66.4	61.7	64.7	69.9	73	62.6	63.1	High	High	High	High	High	High	High	High	High
FALSE	High	Master Protein	P60904	DnaJ homolog subfamily C member 5 OS=Mus musculus OX=10090 GN=Dnajc5 PE=1 SV=1	0	77.028	50	8	49	8	1	198	22.1	5.07	246.68	8	0	0.01	1.009	0.611	0.859	0.553	0.864	0.788	0.515	145.2		146.5	88.8	124.7	80.3	125.4	114.4	74.8	High	Not Found	High	High	High	High	High	High	High
FALSE	High	Master Protein	P12970	60S ribosomal protein L7a OS=Mus musculus OX=10090 GN=Rpl7a PE=1 SV=2	0	76.929	37	12	51	12	1	266	30	10.56	166.52	12	0	0.4	0.704	0.657	0.764	0.737	0.709	0.755	0.712	139.8	55.9	98.4	91.8	106.8	103	99.2	105.5	99.6	High	High	High	High	High	High	High	High	High
FALSE	High	Master Protein	Q03265	ATP synthase subunit alpha, mitochondrial OS=Mus musculus OX=10090 GN=Atp5f1a PE=1 SV=1	0	76.827	32	16	39	16	1	553	59.7	9.19	127.41	16	0	4.39	0.949	0.972	0.944	0.962	0.888	0.925	0.948	75.1	329.9	71.3	73	70.9	72.3	66.7	69.5	71.3	High	High	High	High	High	High	High	High	High
FALSE	High	Master Protein	P14869	60S acidic ribosomal protein P0 OS=Mus musculus OX=10090 GN=Rplp0 PE=1 SV=3	0	76.659	37	9	30	9	1	317	34.2	6.25	109.84	9	0	1.3	0.613	0.6	0.6	0.595	0.653	0.626	0.759	133.4	173.4	81.8	80.1	80	79.4	87.2	83.5	101.2	High	High	High	High	High	High	High	High	High
FALSE	High	Master Protein	Q8K0T7	Protein unc-13 homolog C OS=Mus musculus OX=10090 GN=Unc13c PE=1 SV=3	0	76.645	8	13	16	11	1	2210	249.7	6.07	59.95	13	2	2.555	0.703	0.747	0.809	0.86	0.779	0.76	0.856	99.3	253.6	69.8	74.1	80.3	85.4	77.3	75.4	84.9	High	High	High	High	High	High	High	High	High
FALSE	High	Master Protein	Q8BQZ4	Ral GTPase-activating protein subunit beta OS=Mus musculus OX=10090 GN=Ralgapb PE=1 SV=2	0	76.635	15	14	30	14	1	1484	165.1	6.77	92.42	14	0	0.01	0.939	0.904	0.995	0.94	1.013	0.889	1.101	115.7		108.6	104.5	115.1	108.7	117.1	102.9	127.4	High	Not Found	High	High	High	High	High	High	High
FALSE	High	Master Protein	Q9EQF6	Dihydropyrimidinase-related protein 5 OS=Mus musculus OX=10090 GN=Dpysl5 PE=1 SV=1	0	76.498	29	11	42	11	1	564	61.5	7.09	108.04	11	0	0.525	1.287	1.341	1.417	1.348	1.311	1.328	1.252	83.3	43.7	107.1	111.7	118	112.2	109.2	110.6	104.2	High	High	High	High	High	High	High	High	High
FALSE	High	Master Protein	P63213	Guanine nucleotide-binding protein G(I)/G(S)/G(O) subunit gamma-2 OS=Mus musculus OX=10090 GN=Gng2 PE=1 SV=2	0	76.264	65	6	33	6	1	71	7.8	7.99	114.39	6	0	0.476	1.254	1.147	1.328	1.215	1.293	1.347	1.305	86.8	41.4	108.9	99.6	115.3	105.5	112.3	116.9	113.3	High	High	High	High	High	High	High	High	High
FALSE	High	Master Protein	Q9CQV8	14-3-3 protein beta/alpha OS=Mus musculus OX=10090 GN=Ywhab PE=1 SV=3	0	75.982	52	12	42	6	1	246	28.1	4.83	127.9	12	0	0.01	1.082	0.98	1.029	0.855	1.073	1.039	1.094	110.4		119.5	108.2	113.5	94.4	118.5	114.7	120.8	High	Not Found	High	High	High	High	High	High	High
FALSE	High	Master Protein	Q03137	Ephrin type-A receptor 4 OS=Mus musculus OX=10090 GN=Epha4 PE=1 SV=2	0	75.894	18	12	21	10	1	986	109.7	6.51	66.05	12	2	0.39	1.053	0.892	1.015	0.973	0.956	1.037	0.95	108.9	42.5	114.7	97.1	110.4	105.9	104.1	112.9	103.4	High	High	High	High	High	High	High	High	High
FALSE	High	Master Protein	Q8VEK0	Cell cycle control protein 50A OS=Mus musculus OX=10090 GN=Tmem30a PE=1 SV=1	0	75.864	39	12	56	12	1	364	41	8.37	145.89	12	0	0.839	1.216	0.939	1.182	0.932	1.134	1.213	0.947	95.7	80.3	116.4	89.9	113.1	89.2	108.5	116.1	90.6	High	High	High	High	High	High	High	High	High
FALSE	High	Master Protein	Q91V14	Solute carrier family 12 member 5 OS=Mus musculus OX=10090 GN=Slc12a5 PE=1 SV=2	0	75.817	15	15	52	12	1	1138	126.2	6.74	117.79	15	1	2.842	1.266	1.259	1.247	1.269	1.501	1.34	1.176	69.8	198.3	88.3	87.8	87	88.5	104.7	93.5	82.1	High	High	High	High	High	High	High	High	High
FALSE	High	Master Protein	Q8BMG7	Rab3 GTPase-activating protein non-catalytic subunit OS=Mus musculus OX=10090 GN=Rab3gap2 PE=1 SV=2	0	75.316	13	14	23	14	1	1366	152.4	6.23	69.76	14	0	0.01	1.062	1.067	1.034	1.044	1.094	0.958	1.079	107.9		114.7	115.2	111.6	112.7	118.1	103.4	116.5	High	High	High	High	High	High	High	High	High
FALSE	High	Master Protein	Q60930	Voltage-dependent anion-selective channel protein 2 OS=Mus musculus OX=10090 GN=Vdac2 PE=1 SV=2	0	75.308	36	10	45	9	1	295	31.7	7.49	154.06	10	0	0.525	1.106	0.99	1.033	0.856	1.168	1.151	0.995	102	53.5	112.8	101	105.4	87.3	119.1	117.4	101.5	High	High	High	High	High	High	High	High	High
FALSE	High	Master Protein	P62192	26S proteasome regulatory subunit 4 OS=Mus musculus OX=10090 GN=Psmc1 PE=1 SV=1	0	75.175	37	14	34	12	1	440	49.2	6.21	95.06	14	0	3.883	1.054	1.189	1.149	1.184	1.106	1.083	1.12	70.5	273.7	74.3	83.8	81	83.5	77.9	76.4	78.9	High	High	High	High	High	High	High	High	High
FALSE	High	Master Protein	B2RSH2	Guanine nucleotide-binding protein G(i) subunit alpha-1 OS=Mus musculus OX=10090 GN=Gnai1 PE=1 SV=1	0	75.112	41	11	47	6	1	354	40.3	5.97	167.98	11	0	0.01	1.119	0.96	1.07	0.956	1.081	1.121	0.958	108.9		121.8	104.5	116.5	104.1	117.7	122.1	104.3	High	High	High	High	High	High	High	High	High
FALSE	High	Master Protein	Q62277	Synaptophysin OS=Mus musculus OX=10090 GN=Syp PE=1 SV=2	0	75.085	26	9	241	8	1	314	34	4.94	714.91	9	1	0.156	1.223	0.78	1.204	0.73	1.054	1.196	0.775	110.9	17.2	135.6	86.4	133.5	80.9	116.9	132.7	85.9	High	High	High	High	High	High	High	High	High
FALSE	High	Master Protein	P47754	F-actin-capping protein subunit alpha-2 OS=Mus musculus OX=10090 GN=Capza2 PE=1 SV=3	0	74.974	35	8	27	6	1	286	32.9	5.85	109.25	8	1	0.01	1.036	0.923	0.975	0.932	0.918	0.956	0.953	117		121.2	108	114.1	109	107.3	111.8	111.5	High	Not Found	High	High	High	High	High	High	High
FALSE	High	Master Protein	Q6ZQ38	Cullin-associated NEDD8-dissociated protein 1 OS=Mus musculus OX=10090 GN=Cand1 PE=1 SV=2	0	74.907	16	18	35	18	1	1230	136.2	5.78	101.78	18	0	1.387	1.203	0.996	1.153	0.964	1.188	1.084	0.948	90.7	125.8	109.1	90.3	104.6	87.4	107.7	98.3	86	High	High	High	High	High	High	High	High	High
FALSE	High	Master Protein	Q9ER00	Syntaxin-12 OS=Mus musculus OX=10090 GN=Stx12 PE=1 SV=1	0	74.637	40	11	91	11	1	274	31.2	5.44	281.9	11	0	0.355	1.221	1.121	1.217	1.068	1.137	1.237	1.057	95.6	33.9	116.7	107.2	116.4	102.1	108.7	118.3	101.1	High	High	High	High	High	High	High	High	High
FALSE	High	Master Protein	P63321	Ras-related protein Ral-A OS=Mus musculus OX=10090 GN=Rala PE=1 SV=1	0	74.555	36	7	21	7	1	206	23.5	7.11	89.83	7	0	0.212	0.852	0.754	0.635	0.581	0.839	0.922	0.789	136.7	29	116.5	103	86.8	79.4	114.6	126.1	107.8	High	High	High	High	High	High	High	High	High
FALSE	High	Master Protein	O08547	Vesicle-trafficking protein SEC22b OS=Mus musculus OX=10090 GN=Sec22b PE=1 SV=3	0	74.52	43	8	22	8	1	215	24.7	8.51	79.68	8	0	0.01	0.943	0.863	1.008	0.876	0.996	0.993	0.868	119.3		112.5	102.9	120.2	104.5	118.8	118.4	103.5	High	Not Found	High	High	High	High	High	High	High
FALSE	High	Master Protein	O88685	26S proteasome regulatory subunit 6A OS=Mus musculus OX=10090 GN=Psmc3 PE=1 SV=2	0	74.369	40	13	29	13	1	442	49.5	5.19	86.54	13	0	0.01	1.351	1.499	1.43	1.614	1.258	1.393	1.472	81.7		110.3	122.4	116.9	131.9	102.8	113.8	120.2	High	High	High	High	High	High	High	High	High
FALSE	High	Master Protein	Q6ZQ58	La-related protein 1 OS=Mus musculus OX=10090 GN=Larp1 PE=1 SV=3	0	73.892	18	13	25	13	1	1072	121.1	8.79	76.89	13	0	0.948	1.299	1.218	1.374	1.249	1.421	1.33	1.23	81.3	77	105.6	99	111.7	101.6	115.6	108.2	100	High	High	High	High	High	High	High	High	High
FALSE	High	Master Protein	Q5DQR4	Syntaxin-binding protein 5-like OS=Mus musculus OX=10090 GN=Stxbp5l PE=1 SV=1	0	73.744	16	12	19	12	1	1185	131.8	6.86	66.47	12	0	1.909	1.199	0.987	1.251	0.958	1.122	1.259	0.902	85	162.3	101.9	83.9	106.3	81.5	95.4	107	76.7	High	High	High	High	High	High	High	High	High
FALSE	High	Master Protein	Q7TQD2	Tubulin polymerization-promoting protein OS=Mus musculus OX=10090 GN=Tppp PE=1 SV=1	0	73.551	50	12	39	12	1	218	23.6	9.42	117.09	12	0	0.685	1.388	1.188	1.416	1.277	1.339	1.463	1.292	81.5	55.8	113	96.8	115.4	104	109.1	119.2	105.2	High	High	High	High	High	High	High	High	High
FALSE	High	Master Protein	Q99PJ0	Neurotrimin OS=Mus musculus OX=10090 GN=Ntm PE=1 SV=2	0	73.541	33	9	64	9	1	344	38	7.81	191.02	9	0	0.01	1.082	0.946	1.099	1	1.012	1.133	1.001	108.8		117.7	102.9	119.5	108.8	110.1	123.3	108.9	High	High	High	High	High	High	High	High	High
FALSE	High	Master Protein	Q8CGK7	Guanine nucleotide-binding protein G(olf) subunit alpha OS=Mus musculus OX=10090 GN=Gnal PE=1 SV=1	0	73.241	33	9	24	8	1	381	44.3	6.65	93.81	9	0	0.01	0.62	0.491	0.481	0.453	0.867	0.57	0.436	183		113.5	89.8	88.1	83	158.6	104.2	79.7	High	High	High	High	High	High	High	High	High
FALSE	High	Master Protein	P50396	Rab GDP dissociation inhibitor alpha OS=Mus musculus OX=10090 GN=Gdi1 PE=1 SV=3	0	72.95	32	10	30	8	1	447	50.5	5.08	90.65	10	2	0.973	1.036	0.937	1.032	0.989	1.076	1.085	0.973	98.9	96.2	102.5	92.7	102	97.8	106.4	107.3	96.2	High	High	High	High	High	High	High	High	High
FALSE	High	Master Protein	P63037	DnaJ homolog subfamily A member 1 OS=Mus musculus OX=10090 GN=Dnaja1 PE=1 SV=1	0	72.439	28	9	25	8	1	397	44.8	7.08	89.64	9	0	6.558	1.227	1.915	1.395	2.234	1.333	1.228	1.767	48.2	316.4	59.2	92.4	67.3	107.8	64.3	59.3	85.2	High	High	High	High	High	High	High	High	High
FALSE	High	Master Protein	Q62167	ATP-dependent RNA helicase DDX3X OS=Mus musculus OX=10090 GN=Ddx3x PE=1 SV=3	0	72.426	26	13	32	13	1	662	73.1	7.18	83.53	13	0	0.875	0.726	0.708	0.757	0.759	0.904	0.748	0.735	124.8	109.2	90.6	88.4	94.5	94.7	112.8	93.4	91.7	High	High	High	High	High	High	High	High	High
FALSE	High	Master Protein	Q7TPR4	Alpha-actinin-1 OS=Mus musculus OX=10090 GN=Actn1 PE=1 SV=1	0	72.425	18	12	22	7	1	892	103	5.38	72.15	12	3	0.794	0.406	0.39	0.438	0.403	0.353	0.356	0.384	198.9	157.8	80.6	77.7	87.2	80.2	70.3	70.9	76.4	High	High	High	High	High	High	High	High	High
FALSE	High	Master Protein	Q9R1R2	Tripartite motif-containing protein 3 OS=Mus musculus OX=10090 GN=Trim3 PE=1 SV=1	0	72.4	13	8	14	8	1	744	80.7	7.81	60.79	8	0	0.831	0.781	0.941	0.81	1.018	0.89	0.782	0.959	112.3	93.3	87.7	105.7	90.9	114.4	100	87.9	107.8	High	High	High	High	High	High	High	High	High
FALSE	High	Master Protein	P10852	4F2 cell-surface antigen heavy chain OS=Mus musculus OX=10090 GN=Slc3a2 PE=1 SV=1	0	72.299	22	10	26	10	1	526	58.3	5.91	97.75	10	0	0.503	1.376	1.209	1.392	1.222	1.313	1.467	1.315	83.4	42	114.7	100.7	116	101.9	109.4	122.3	109.6	High	High	High	High	High	High	High	High	High
FALSE	High	Master Protein	Q99JP7	Glutathione hydrolase 7 OS=Mus musculus OX=10090 GN=Ggt7 PE=1 SV=2	0	72.218	20	11	21	11	1	662	70.2	5.06	77.37	11	0	3.206	1.109	1.07	1.107	1.063	1.117	1.091	1.089	75.9	243.5	84.2	81.3	84.1	80.7	84.8	82.8	82.7	High	High	High	High	High	High	High	High	High
FALSE	High	Master Protein	Q8VDM4	26S proteasome non-ATPase regulatory subunit 2 OS=Mus musculus OX=10090 GN=Psmd2 PE=1 SV=1	0	71.949	14	11	22	11	1	908	100.1	5.17	66.17	11	0	0.397	1.232	1.147	1.182	0.991	1.19	1.15	1.033	96.6	38.3	119	110.7	114.1	95.7	114.9	111	99.7	High	High	High	High	High	High	High	High	High
FALSE	High	Master Protein	P62754	40S ribosomal protein S6 OS=Mus musculus OX=10090 GN=Rps6 PE=1 SV=1	0	71.738	29	7	29	7	1	249	28.7	10.84	112.75	7	0	0.197	0.337	0.376	0.336	0.375	0.359	0.338	0.347	245.6	48.4	82.8	92.3	82.4	92	88.1	83.1	85.3	High	High	High	High	High	High	High	High	High
FALSE	High	Master Protein	Q9Z1Q9	Valine--tRNA ligase OS=Mus musculus OX=10090 GN=Vars PE=1 SV=1	0	71.7	13	14	19	14	1	1263	140.1	7.77	66.38	14	0	0.826	0.768	0.963	0.79	0.906	0.814	0.741	0.874	117.1	96.8	90	112.8	92.6	106.1	95.4	86.8	102.4	High	High	High	High	High	High	High	High	High
FALSE	High	Master Protein	Q8C561	LMBR1 domain-containing protein 2 OS=Mus musculus OX=10090 GN=Lmbrd2 PE=1 SV=1	0	71.613	17	10	21	10	1	694	81	7.34	73.23	10	0	0.01	1.129	0.98	1.125	1.012	1.06	1.117	0.954	107.4		121.3	105.3	120.8	108.7	113.9	120	102.5	High	Not Found	High	High	High	High	High	High	High
FALSE	High	Master Protein	Q80YA9	Connector enhancer of kinase suppressor of ras 2 OS=Mus musculus OX=10090 GN=Cnksr2 PE=1 SV=1	0	71.395	13	11	22	11	1	1032	117.3	6.79	78.18	11	0	0.01	0.709	0.697	0.744	0.762	0.777	0.706	0.74	146.7		104	102.3	109.1	111.7	114	103.5	108.6	High	Not Found	High	High	High	High	High	High	High
FALSE	High	Master Protein	Q9EP53	Hamartin OS=Mus musculus OX=10090 GN=Tsc1 PE=1 SV=1	0	70.897	16	12	25	12	1	1161	128.7	6.37	88.04	12	0	0.01	1.05	1.147	1.035	1.229	1.038	0.995	1.206	103.5		108.6	118.7	107.1	127.2	107.4	102.9	124.7	High	High	High	High	High	High	High	High	High
FALSE	High	Master Protein	Q62465	Synaptic vesicle membrane protein VAT-1 homolog OS=Mus musculus OX=10090 GN=Vat1 PE=1 SV=3	0	70.556	33	10	25	10	1	406	43.1	6.37	89.72	10	0	0.862	1.183	1.14	1.227	1.27	1.15	1.199	1.202	87.9	75.8	104.1	100.2	107.9	111.7	101.2	105.5	105.7	High	High	High	High	High	High	High	High	High
FALSE	High	Master Protein	Q6ZWX6	Eukaryotic translation initiation factor 2 subunit 1 OS=Mus musculus OX=10090 GN=Eif2s1 PE=1 SV=3	0	70.422	35	9	33	9	1	315	36.1	5.08	108.75	9	0	1.221	1.109	1.048	1.114	1.123	1.412	1.051	1.023	89.1	108.8	98.8	93.4	99.3	100.1	125.8	93.6	91.1	High	High	High	High	High	High	High	High	High
FALSE	High	Master Protein	A2AQ07	Tubulin beta-1 chain OS=Mus musculus OX=10090 GN=Tubb1 PE=1 SV=1	0	70.385	12	7	234	1	1	451	50.4	5.07	624.11	7	0	0.01	0.919	0.889	0.878	1.07	1.012	0.874	1.328	112.9		103.8	100.4	99.2	120.8	114.2	98.7	150	High	Not Found	High	High	High	High	High	High	High
FALSE	High	Master Protein	P26645	Myristoylated alanine-rich C-kinase substrate OS=Mus musculus OX=10090 GN=Marcks PE=1 SV=2	0	70.186	29	5	13	5	1	309	29.6	4.34	78.96	5	0	0.01	1.084	1.355	1.041	1.348	1.029	1.129	1.278	97.1		105.3	131.7	101.2	131	99.9	109.7	124.2	High	Not Found	High	High	High	High	High	High	High
FALSE	High	Master Protein	Q9D8W5	26S proteasome non-ATPase regulatory subunit 12 OS=Mus musculus OX=10090 GN=Psmd12 PE=1 SV=4	0	70.025	33	12	25	11	1	456	52.9	7.06	70.39	12	0	0.01	1.282	1.199	1.387	1.036	1.256	1.37	1.102	93.4		119.8	112	129.6	96.8	117.3	128	103	High	High	High	High	High	High	High	High	High
FALSE	High	Master Protein	Q6PF93	Phosphatidylinositol 3-kinase catalytic subunit type 3 OS=Mus musculus OX=10090 GN=Pik3c3 PE=1 SV=1	0	69.474	16	11	13	11	1	887	101.4	6.73	44.12	11	0	0.01	0.997	1.003	1.082	1.101	1.009	0.997	1.048	109.2		108.9	109.5	118.3	120.3	110.3	108.9	114.5	High	Not Found	High	High	High	High	High	High	High
FALSE	High	Master Protein	P61021	Ras-related protein Rab-5B OS=Mus musculus OX=10090 GN=Rab5b PE=1 SV=1	0	69.347	45	7	37	4	1	215	23.7	8.13	105.16	7	0	0.01	0.953	0.788	0.985	0.855	0.902	0.928	0.835	124.2		118.4	97.8	122.4	106.2	112.1	115.2	103.7	High	Not Found	High	High	High	High	High	High	High
FALSE	High	Master Protein	Q3UYC0	Protein phosphatase 1H OS=Mus musculus OX=10090 GN=Ppm1h PE=1 SV=1	0	69.313	27	11	39	11	1	513	56.3	6.73	112.28	11	0	0.539	1.304	0.969	1.304	0.979	1.259	1.276	1.027	93.2	50.2	121.5	90.3	121.6	91.2	117.3	118.9	95.7	High	High	High	High	High	High	High	High	High
FALSE	High	Master Protein	P35293	Ras-related protein Rab-18 OS=Mus musculus OX=10090 GN=Rab18 PE=1 SV=2	0	69.273	61	10	32	10	1	206	23	5.36	99.59	10	0	1.443	1.203	0.943	1.302	1.018	0.944	1.324	0.975	88.6	127.9	106.7	83.6	115.4	90.2	83.7	117.4	86.4	High	High	High	High	High	High	High	High	High
FALSE	High	Master Protein	Q9JJ28	Protein flightless-1 homolog OS=Mus musculus OX=10090 GN=Flii PE=1 SV=1	0	69.186	15	12	23	12	1	1271	144.7	6.06	64.04	12	0	1.095	0.867	0.936	0.906	1.064	0.927	0.829	0.998	104.4	114.3	90.5	97.7	94.6	111	96.7	86.5	104.2	High	High	High	High	High	High	High	High	High
FALSE	High	Master Protein	P21279	Guanine nucleotide-binding protein G(q) subunit alpha OS=Mus musculus OX=10090 GN=Gnaq PE=1 SV=4	0	68.927	24	9	26	7	1	359	42.1	5.68	80.3	9	0	0.155	1.207	1.238	1.239	1.293	1.22	1.28	1.318	90.4	14	109.2	112	112	117	110.4	115.8	119.2	High	High	High	High	High	High	High	High	High
FALSE	High	Master Protein	Q9Z0P4	Paralemmin-1 OS=Mus musculus OX=10090 GN=Palm PE=1 SV=1	0	68.778	35	13	32	12	1	383	41.6	4.84	94.28	13	0	0.01	0.918	1.003	0.89	1.033	0.906	0.897	0.95	118.4		108.8	118.8	105.5	122.4	107.3	106.3	112.5	High	High	High	High	High	High	High	High	High
FALSE	High	Master Protein	P16014	Secretogranin-1 OS=Mus musculus OX=10090 GN=Chgb PE=1 SV=2	0	68.704	17	11	26	11	1	677	77.9	5.07	74.93	11	0	1.369	1.146	1.002	1.033	1.012	1.152	1.075	1.114	90.9	124.4	104.2	91	93.9	92	104.7	97.7	101.2	High	High	High	High	High	High	High	High	High
FALSE	High	Master Protein	P47856	Glutamine--fructose-6-phosphate aminotransferase [isomerizing] 1 OS=Mus musculus OX=10090 GN=Gfpt1 PE=1 SV=3	0	68.669	19	9	18	9	1	697	78.5	6.84	59.3	9	0	1.528	1.187	1.026	1.27	1.231	1.012	1.164	1.122	85.4	130.5	101.4	87.6	108.4	105.1	86.4	99.4	95.8	High	High	High	High	High	High	High	High	High
FALSE	High	Master Protein	Q3UH66	Serine/threonine-protein kinase WNK2 OS=Mus musculus OX=10090 GN=Wnk2 PE=1 SV=2	0	68.567	11	12	14	12	1	2149	227.4	5.91	43.09	12	0	0.01	0.785	0.744	0.818	0.806	0.809	0.79	0.76	138.2		108.4	102.8	113.1	111.4	111.8	109.2	105.1	High	Not Found	High	High	High	High	High	High	High
FALSE	High	Master Protein	Q61543	Golgi apparatus protein 1 OS=Mus musculus OX=10090 GN=Glg1 PE=1 SV=1	0	68.299	17	14	21	14	1	1175	133.6	6.84	67.77	14	0	0.01	0.989	0.961	0.949	1.015	0.95	0.916	0.994	115.8		114.5	111.3	109.9	117.5	109.9	106.1	115	High	Not Found	High	High	High	High	High	High	High
FALSE	High	Master Protein	Q8BXR9	Oxysterol-binding protein-related protein 6 OS=Mus musculus OX=10090 GN=Osbpl6 PE=1 SV=1	0	68.159	16	13	26	13	1	959	108.9	7.27	85.87	13	0	2.63	0.988	0.893	1.066	0.886	1.02	0.89	0.859	88	231.4	86.9	78.5	93.8	77.9	89.7	78.3	75.5	High	High	High	High	High	High	High	High	High
FALSE	High	Master Protein	P63216	Guanine nucleotide-binding protein G(I)/G(S)/G(O) subunit gamma-3 OS=Mus musculus OX=10090 GN=Gng3 PE=1 SV=1	0	68.123	75	5	14	5	1	75	8.3	7.78	69.04	5	0	0.01	1.057	1.015	1.145	1.138	1.139	1.152	1.138	102.4		108.3	104	117.3	116.6	116.7	118	116.6	High	High	High	High	High	High	High	High	High
FALSE	High	Master Protein	Q61584	Fragile X mental retardation syndrome-related protein 1 OS=Mus musculus OX=10090 GN=Fxr1 PE=1 SV=2	0	68.09	16	9	23	8	1	677	76.2	6.98	71.44	9	1	2.411	0.928	0.814	0.966	0.881	0.958	0.876	0.798	93.4	225.2	86.7	76.1	90.3	82.3	89.5	81.8	74.6	High	High	High	High	High	High	High	High	High
FALSE	High	Master Protein	Q9D1K2	V-type proton ATPase subunit F OS=Mus musculus OX=10090 GN=Atp6v1f PE=1 SV=2	0	67.886	50	9	66	9	1	119	13.4	5.82	207.46	9	0	0.633	1.413	0.963	1.421	1.028	1.245	1.391	1.026	88.9	56.3	125.6	85.7	126.4	91.4	110.7	123.7	91.3	High	High	High	High	High	High	High	High	High
FALSE	High	Master Protein	P17879	Heat shock 70 kDa protein 1B OS=Mus musculus OX=10090 GN=Hspa1b PE=1 SV=3	0	67.768	19	10	107	4	1	642	70.1	5.72	356.59	10	0	0.01	0.465	0.478	0.532	0.507	0.522	0.435	0.491	203.2		94.4	97.2	108	102.9	106.1	88.4	99.7	High	Not Found	High	High	High	High	High	High	High
FALSE	High	Master Protein	Q99KX1	Myeloid leukemia factor 2 OS=Mus musculus OX=10090 GN=Mlf2 PE=1 SV=1	0	67.582	41	8	45	8	1	247	28	6.98	150.19	8	0	2.592	1.297	1.214	1.314	1.305	1.3	1.311	1.363	70.9	183.8	91.9	86.1	93.2	92.5	92.1	92.9	96.6	High	High	High	High	High	High	High	High	High
FALSE	High	Master Protein	Q8R2R9	AP-3 complex subunit mu-2 OS=Mus musculus OX=10090 GN=Ap3m2 PE=1 SV=1	0	67.328	30	10	21	7	1	418	46.9	7.56	78.31	10	2	1.993	1.183	1.2	1.307	1.216	1.226	1.204	1.192	78.1	155.7	92.4	93.7	102.1	95	95.8	94	93.1	High	High	High	High	High	High	High	High	High
FALSE	High	Master Protein	Q9D832	DnaJ homolog subfamily B member 4 OS=Mus musculus OX=10090 GN=Dnajb4 PE=1 SV=1	0	67.072	26	8	15	7	1	337	37.8	8.59	58.74	8	1	0.01	1.057	1.028	1.009	0.95	0.965	1.027	0.878	113.7		120.2	116.9	114.8	108.1	109.8	116.8	99.9	High	High	High	High	High	High	High	High	High
FALSE	High	Master Protein	O55042	Alpha-synuclein OS=Mus musculus OX=10090 GN=Snca PE=1 SV=2	0	66.848	49	7	19	5	1	140	14.5	4.77	78.56	7	1	0.942	1.209	1.091	1.144	1.093	1.269	1.147	1.082	90.2	85	109.1	98.4	103.2	98.6	114.5	103.5	97.6	High	High	High	High	High	High	High	High	High
FALSE	High	Master Protein	Q60875	Rho guanine nucleotide exchange factor 2 OS=Mus musculus OX=10090 GN=Arhgef2 PE=1 SV=4	0	66.639	17	15	35	15	1	985	111.9	7.25	92.14	15	0	0.598	0.553	0.544	0.514	0.558	0.54	0.518	0.565	167	99.8	92.3	90.9	85.9	93.2	90.2	86.5	94.3	High	High	High	High	High	High	High	High	High
FALSE	High	Master Protein	Q9WV55	Vesicle-associated membrane protein-associated protein A OS=Mus musculus OX=10090 GN=Vapa PE=1 SV=2	0	66.531	40	9	33	8	1	249	27.8	8.4	121.62	9	1	0.236	0.749	0.703	0.771	0.784	0.797	0.742	0.729	138.2	32.7	103.6	97.2	106.6	108.3	110.1	102.6	100.7	High	High	High	High	High	High	High	High	High
FALSE	High	Master Protein	Q8VHI6	Wiskott-Aldrich syndrome protein family member 3 OS=Mus musculus OX=10090 GN=Wasf3 PE=1 SV=1	0	66.462	18	6	9	5	1	501	55.2	6.37	44.32	6	0	0.01	0.884	0.868	0.868	0.85	0.996	0.827	0.863	125.8		111.2	109.2	109.2	106.9	125.3	104	108.5	High	Not Found	High	High	High	High	High	High	High
FALSE	High	Master Protein	Q8R5C5	Beta-centractin OS=Mus musculus OX=10090 GN=Actr1b PE=1 SV=1	0	66.207	32	9	19	4	1	376	42.3	6.4	69.63	9	0	0.01	1.472	1.353	1.301	1.076	1.255	1.31	1.116	91.1		134.1	123.2	118.4	98	114.3	119.3	101.6	High	High	High	High	High	High	High	High	High
FALSE	High	Master Protein	Q8CGC7	Bifunctional glutamate/proline--tRNA ligase OS=Mus musculus OX=10090 GN=Eprs PE=1 SV=4	0	65.944	11	12	16	12	1	1512	170	7.66	63.41	12	0	0.726	1.01	0.973	0.998	0.972	1.118	0.94	0.994	103.1	74.9	104.2	100.3	102.9	100.2	115.2	96.9	102.4	High	High	High	High	High	High	High	High	High
FALSE	High	Master Protein	P14152	Malate dehydrogenase, cytoplasmic OS=Mus musculus OX=10090 GN=Mdh1 PE=1 SV=3	0	65.932	35	13	47	13	1	334	36.5	6.58	119.99	13	0	0.199	1.109	1.052	1.09	1.107	1.157	1.186	1.197	98.9	19.7	109.7	104.1	107.9	109.5	114.5	117.4	118.4	High	High	High	High	High	High	High	High	High
FALSE	High	Master Protein	Q60737	Casein kinase II subunit alpha OS=Mus musculus OX=10090 GN=Csnk2a1 PE=1 SV=2	0	65.794	31	9	35	8	1	391	45.1	7.74	108.02	9	0	0.01	0.855	0.853	0.874	0.898	0.944	0.86	0.961	124.2		106.2	106	108.5	111.5	117.3	106.9	119.4	High	High	High	High	High	High	High	High	High
FALSE	High	Master Protein	Q80WQ2	Protein VAC14 homolog OS=Mus musculus OX=10090 GN=Vac14 PE=1 SV=1	0	65.722	22	14	30	14	1	782	88	6.13	93.01	14	0	0.01	1.011	0.864	0.994	0.871	1.015	0.972	0.832	119		120.3	102.9	118.3	103.7	120.9	115.7	99.1	High	High	High	High	High	High	High	High	High
FALSE	High	Master Protein	Q6PGL7	WASH complex subunit 2 OS=Mus musculus OX=10090 GN=Washc2 PE=1 SV=1	0	65.721	15	11	15	11	1	1334	145.2	4.77	46.39	11	0	0.01	1.019	1.012	1.027	1.155	1.002	0.937	1.138	108.5		110.6	109.8	111.5	125.4	108.8	101.8	123.6	High	Not Found	High	High	High	High	High	High	High
FALSE	High	Master Protein	P63001	Ras-related C3 botulinum toxin substrate 1 OS=Mus musculus OX=10090 GN=Rac1 PE=1 SV=1	0	65.701	38	10	81	5	1	192	21.4	8.5	216.68	10	5	0.131	0.804	0.699	0.854	0.798	0.881	0.862	0.795	131.9	17.3	106.1	92.2	112.6	105.2	116.2	113.7	104.8	High	Not Found	High	High	High	High	High	High	High
FALSE	High	Master Protein	O70325	Phospholipid hydroperoxide glutathione peroxidase OS=Mus musculus OX=10090 GN=Gpx4 PE=1 SV=4	0	65.686	48	10	26	10	1	197	22.2	8.46	86.52	10	0	0.01	1.403	1.03	1.295	0.973	1.34	1.303	0.997	96.3		135.2	99.2	124.8	93.8	129.1	125.5	96	High	High	High	High	High	High	High	High	High
FALSE	High	Master Protein	P61027	Ras-related protein Rab-10 OS=Mus musculus OX=10090 GN=Rab10 PE=1 SV=1	0	65.665	38	9	119	6	1	200	22.5	8.38	315.76	9	0	1.374	1.061	0.815	1.04	0.854	0.972	1.04	0.826	100.2	137.7	106.3	81.7	104.2	85.6	97.4	104.2	82.7	High	High	High	High	High	High	High	High	High
FALSE	High	Master Protein	P63330	Serine/threonine-protein phosphatase 2A catalytic subunit alpha isoform OS=Mus musculus OX=10090 GN=Ppp2ca PE=1 SV=1	0	65.548	35	8	15	1	1	309	35.6	5.54	52.46	8	0	0.01	0.497	0.466	0.475	0.506	0.727	0.413	0.494	196.6		97.7	91.6	93.5	99.5	143	81.1	97	High	High	High	High	High	High	High	High	High
FALSE	High	Master Protein	Q80X80	Phospholipid transfer protein C2CD2L OS=Mus musculus OX=10090 GN=C2cd2l PE=1 SV=3	0	65.461	25	10	15	10	1	706	76.3	7.21	49.68	10	0	0.01	0.729	0.687	0.731	0.727	0.761	0.717	0.846	145.2		105.8	99.8	106.2	105.6	110.5	104.1	122.8	High	Not Found	High	High	High	High	High	High	High
FALSE	High	Master Protein	Q99J85	Neuronal pentraxin receptor OS=Mus musculus OX=10090 GN=Nptxr PE=1 SV=1	0	65.399	22	9	27	9	1	493	52.3	6.13	113.34	9	0	0.468	1.051	0.93	1.036	1.097	1.054	1.03	1.062	103.1	48.3	108.4	95.9	106.9	113.1	108.7	106.2	109.5	High	High	High	High	High	High	High	High	High
FALSE	High	Master Protein	Q9WTM5	RuvB-like 2 OS=Mus musculus OX=10090 GN=Ruvbl2 PE=1 SV=3	0	65.129	24	10	22	10	1	463	51.1	5.64	64.67	10	0	0.01	1.246	1.397	1.308	1.471	1.26	1.21	1.419	87.3		108.8	121.9	114.2	128.4	110	105.7	123.9	High	High	High	High	High	High	High	High	High
FALSE	High	Master Protein	P61164	Alpha-centractin OS=Mus musculus OX=10090 GN=Actr1a PE=1 SV=1	0	64.852	34	11	44	5	1	376	42.6	6.64	122.79	11	2	1.443	1.551	1.495	1.669	1.425	1.323	1.561	1.373	70.1	101.1	108.7	104.8	117	99.9	92.7	109.4	96.2	High	High	High	High	High	High	High	High	High
FALSE	High	Master Protein	P84096	Rho-related GTP-binding protein RhoG OS=Mus musculus OX=10090 GN=Rhog PE=1 SV=1	0	64.827	47	8	21	7	1	191	21.3	8.12	69.89	8	0	0.625	1.109	1.079	1.126	1.174	1.061	1.033	1.123	96.5	60.3	107	104.1	108.6	113.2	102.3	99.6	108.4	High	High	High	High	High	High	High	High	High
FALSE	High	Master Protein	P01807	Ig heavy chain V region X44 OS=Mus musculus OX=10090 PE=1 SV=1	0	64.604	61	6	264	5	1	119	13.2	7.94	838.55	6	1	5.815	0.818	7.128	0.645	6.707	0.919	0.627	6.971	29.4	170.9	24	209.4	19	197.1	27	18.4	204.8	High	High	High	High	High	High	High	High	High
FALSE	High	Master Protein	Q91WC3	Long-chain-fatty-acid--CoA ligase 6 OS=Mus musculus OX=10090 GN=Acsl6 PE=1 SV=1	0	64.414	23	13	16	13	1	697	78	7.34	49.58	13	0	1.712	0.746	0.699	0.82	0.707	0.821	0.788	0.663	113.1	193.7	84.4	79.1	92.8	80	92.9	89.1	75	High	High	High	High	High	High	High	High	High
FALSE	High	Master Protein	P60335	Poly(rC)-binding protein 1 OS=Mus musculus OX=10090 GN=Pcbp1 PE=1 SV=1	0	64.188	34	9	34	5	1	356	37.5	7.09	113.66	9	3	0.01	0.864	0.93	0.899	0.985	0.88	0.826	0.929	123		106.4	114.5	110.7	121.2	108.3	101.6	114.3	High	High	High	High	High	High	High	High	High
FALSE	High	Master Protein	P61294	Ras-related protein Rab-6B OS=Mus musculus OX=10090 GN=Rab6b PE=1 SV=1	0	64.117	47	10	80	4	1	208	23.4	5.53	234.35	10	4	3.844	0.894	0.752	0.926	0.776	0.863	0.846	0.786	84.2	323.7	75.3	63.3	78	65.3	72.7	71.2	66.2	High	High	High	High	High	High	High	High	High
FALSE	High	Master Protein	Q61753	D-3-phosphoglycerate dehydrogenase OS=Mus musculus OX=10090 GN=Phgdh PE=1 SV=3	0	64.074	24	10	18	10	1	533	56.5	6.54	54.72	10	0	0.539	1.163	1.243	1.154	1.215	1.125	1.093	1.192	92.6	49.9	107.6	115	106.8	112.5	104.2	101.1	110.3	High	High	High	High	High	High	High	High	High
FALSE	High	Master Protein	P01631	Ig kappa chain V-II region 26-10 OS=Mus musculus OX=10090 PE=1 SV=1	0	64.031	39	4	68	4	1	113	12.3	8.88	262.66	4	0	0.381	11.829	1.563	13.658	1.487	0.939	13.834	1.683	19.4	7.4	229.6	30.3	265.1	28.9	18.2	268.5	32.7	High	High	High	High	High	High	High	High	High
FALSE	High	Master Protein	Q9QY76	Vesicle-associated membrane protein-associated protein B OS=Mus musculus OX=10090 GN=Vapb PE=1 SV=3	0	63.965	29	8	30	7	1	243	26.9	7.78	105.99	8	0	1.788	0.713	0.706	0.783	0.822	0.785	0.78	0.764	110.5	197.7	78.9	78	86.6	90.9	86.7	86.2	84.4	High	High	High	High	High	High	High	High	High
FALSE	High	Master Protein	P18528	Ig heavy chain V region 6.96 OS=Mus musculus OX=10090 PE=4 SV=1	0	63.434	31	2	105	1	1	98	11	7.93	474.12	2	0	9.868	0.931	16.186	0.799	17.205	0.989	1.085	15.927	14.1	138.8	13.1	227.6	11.2	242	13.9	15.3	224	High	High	High	High	High	High	High	High	High
FALSE	High	Master Protein	Q7TT37	Elongator complex protein 1 OS=Mus musculus OX=10090 GN=Elp1 PE=1 SV=2	0	63.408	13	11	24	11	1	1333	149.5	6	68.17	11	0	0.01	1.065	1.09	1.05	1.205	1.022	0.966	1.131	105.5		112.4	115	110.9	127.1	107.9	101.9	119.3	High	High	High	High	High	High	High	High	High
FALSE	High	Master Protein	Q6ZWV3	60S ribosomal protein L10 OS=Mus musculus OX=10090 GN=Rpl10 PE=1 SV=3	0	63.294	34	7	28	7	1	214	24.6	10.08	90.34	7	0	0.01	0.543	0.539	0.564	0.61	0.549	0.564	0.581	181.8		98.8	98.1	102.5	110.8	99.8	102.5	105.6	High	Not Found	High	High	High	High	High	High	High
FALSE	High	Master Protein	P70392	Ras-specific guanine nucleotide-releasing factor 2 OS=Mus musculus OX=10090 GN=Rasgrf2 PE=1 SV=2	0	63.109	12	14	24	13	1	1189	135.6	7.85	65.57	14	0	0.789	0.935	1.005	1.008	1.158	0.93	0.887	1.042	102.8	81.1	96.1	103.3	103.6	119.1	95.6	91.2	107.1	High	High	High	High	High	High	High	High	High
FALSE	High	Master Protein	Q8K386	Ras-related protein Rab-15 OS=Mus musculus OX=10090 GN=Rab15 PE=1 SV=1	0	63.099	36	7	77	5	1	212	24.3	5.71	237.67	7	0	0.01	1.227	1.059	1.304	1.108	1.207	1.292	1.074	97.1		119.2	102.8	126.6	107.6	117.1	125.4	104.3	High	High	High	High	High	High	High	High	High
FALSE	High	Master Protein	P21107	Tropomyosin alpha-3 chain OS=Mus musculus OX=10090 GN=Tpm3 PE=1 SV=3	0	63.034	39	15	29	5	1	285	33	4.72	71.95	15	0	0.01	0.967	1.074	0.969	1.193	0.97	0.884	1.218	108.8		105.2	116.8	105.4	129.7	105.5	96.1	132.4	High	Not Found	High	High	High	High	High	High	High
FALSE	High	Master Protein	Q7TMB8	Cytoplasmic FMR1-interacting protein 1 OS=Mus musculus OX=10090 GN=Cyfip1 PE=1 SV=1	0	62.808	10	13	43	4	1	1253	145.1	6.9	100.14	13	0	0.01	0.859	0.812	0.819	0.888	0.877	0.81	0.807	131		112.5	106.3	107.2	116.3	114.8	106.1	105.8	High	Not Found	High	High	High	High	High	High	High
FALSE	High	Master Protein	Q80UJ7	Rab3 GTPase-activating protein catalytic subunit OS=Mus musculus OX=10090 GN=Rab3gap1 PE=1 SV=4	0	62.766	17	13	22	13	1	981	110.1	5.73	60.07	13	0	0.01	1.101	1.1	1.092	1.111	1.043	0.958	1.054	106.4		117.2	117	116.2	118.2	111	102	112.2	High	Not Found	High	High	High	High	High	High	High
FALSE	High	Master Protein	Q8CDG3	Deubiquitinating protein VCIP135 OS=Mus musculus OX=10090 GN=Vcpip1 PE=1 SV=1	0	62.735	13	10	16	10	1	1220	134.4	7.17	55.9	10	0	0.01	1.082	1.221	1.054	1.265	1.029	1.005	1.256	101		109.2	123.3	106.5	127.7	103.9	101.5	126.8	High	Not Found	High	High	High	High	High	High	High
FALSE	High	Master Protein	P02088	Hemoglobin subunit beta-1 OS=Mus musculus OX=10090 GN=Hbb-b1 PE=1 SV=2	0	62.384	49	6	25	3	1	147	15.8	7.65	94.09	6	2	0.01	0.756	0.703	0.718	0.719	0.748	0.707	0.742	147.7		111.7	103.8	106	106.2	110.5	104.4	109.7	High	High	High	High	High	High	High	High	High
FALSE	High	Master Protein	P17751	Triosephosphate isomerase OS=Mus musculus OX=10090 GN=Tpi1 PE=1 SV=4	0	62.325	32	9	31	9	1	299	32.2	5.74	88.86	9	0	0.01	1.375	1.415	1.527	1.662	1.43	1.593	1.645	77.3		106.2	109.3	118	128.4	110.5	123.1	127.1	High	Not Found	High	High	High	High	High	High	High
FALSE	High	Master Protein	Q91YJ2	Sorting nexin-4 OS=Mus musculus OX=10090 GN=Snx4 PE=1 SV=1	0	61.896	29	12	19	12	1	450	51.7	5.8	67.24	12	0	0.01	1.171	0.97	1.219	1.057	1.172	1.174	1.074	101.8		119.3	98.7	124.2	107.6	119.4	119.6	109.4	High	High	High	High	High	High	High	High	High
FALSE	High	Master Protein	Q9DBJ1	Phosphoglycerate mutase 1 OS=Mus musculus OX=10090 GN=Pgam1 PE=1 SV=3	0	61.883	26	5	16	5	1	254	28.8	7.18	63.73	5	0	1.121	1.109	1.094	1.199	1.226	1.213	1.201	1.339	85.7	96.1	95.1	93.7	102.7	105.1	104	102.9	114.8	High	High	High	High	High	High	High	High	High
FALSE	High	Master Protein	Q8CIE6	Coatomer subunit alpha OS=Mus musculus OX=10090 GN=Copa PE=1 SV=2	0	61.818	7	9	19	9	1	1224	138.3	7.65	54.86	9	0	0.01	0.997	1.165	0.996	1.211	1.106	0.988	1.256	103.2		102.9	120.3	102.8	125	114.1	102	129.7	High	Not Found	High	High	High	High	High	High	High
FALSE	High	Master Protein	Q8K400	Syntaxin-binding protein 5 OS=Mus musculus OX=10090 GN=Stxbp5 PE=1 SV=3	0	61.813	12	9	15	9	1	1152	127.6	7.21	45.17	9	0	9.217	1.195	1.16	1.178	1.193	1.159	1.144	1.104	49	452.1	58.6	56.9	57.8	58.5	56.9	56.1	54.1	High	High	High	High	High	High	High	High	High
FALSE	High	Master Protein	P62715	Serine/threonine-protein phosphatase 2A catalytic subunit beta isoform OS=Mus musculus OX=10090 GN=Ppp2cb PE=1 SV=1	0	61.612	33	8	13	1	1	309	35.6	5.43	49.58	8	5	0.01	1.06	1.109	1.128	1.137	1.075	0.99	1.19	103.6		109.8	114.8	116.9	117.7	111.3	102.6	123.3	High	High	High	High	High	High	High	High	High
FALSE	High	Master Protein	P62281	40S ribosomal protein S11 OS=Mus musculus OX=10090 GN=Rps11 PE=1 SV=3	0	61.595	50	10	40	10	1	158	18.4	10.3	117.18	10	0	0.01	0.344	0.354	0.331	0.393	0.375	0.355	0.377	254.2	2.7	87.3	90.1	84.2	100	95.4	90.2	95.8	High	High	High	High	High	High	High	High	High
FALSE	High	Master Protein	P01644	Ig kappa chain V-V region HP R16.7 OS=Mus musculus OX=10090 PE=1 SV=1	0	61.565	54	5	31	2	1	108	11.9	7.97	122.48	5	3	0.606	0.28	1.247	0.238	1.126	0.563	0.251	1.022	142.1	86.1	39.8	177.2	33.9	160.1	80	35.6	145.3	High	High	High	High	High	High	High	High	High
FALSE	High	Master Protein	O54991	Contactin-associated protein 1 OS=Mus musculus OX=10090 GN=Cntnap1 PE=1 SV=2	0	61.296	10	10	20	10	1	1385	156.2	7.06	61.72	10	0	0.01	1.016	1.145	1.134	1.223	1.059	1.103	1.193	101.4		103.1	116.1	115	124.1	107.4	111.9	121	High	High	High	High	High	High	High	High	High
FALSE	High	Master Protein	P59764	Dedicator of cytokinesis protein 4 OS=Mus musculus OX=10090 GN=Dock4 PE=1 SV=1	0	61.239	8	14	20	12	1	1978	226.4	7.65	56.61	14	1	0.01	0.919	0.826	0.907	0.819	0.893	0.884	0.827	127.2		116.8	105.1	115.4	104.1	113.6	112.5	105.2	High	High	High	High	High	High	High	High	High
FALSE	High	Master Protein	Q9ERB0	Synaptosomal-associated protein 29 OS=Mus musculus OX=10090 GN=Snap29 PE=1 SV=1	0	61.192	27	6	14	6	1	260	29.6	5.38	57.17	6	0	0.01	1.367	1	1.401	1.123	1.313	1.432	1.179	91.7		125.3	91.7	128.5	103	120.4	131.3	108.1	High	Not Found	High	High	High	High	High	High	High
FALSE	High	Master Protein	P48722	Heat shock 70 kDa protein 4L OS=Mus musculus OX=10090 GN=Hspa4l PE=1 SV=2	0	61.167	17	10	11	9	1	838	94.3	5.74	33.11	10	0	0.01	0.329	0.271	0.298	0.343	0.712	0.32	0.311	251.2		82.7	68	74.8	86.1	178.9	80.3	78	High	High	High	High	High	High	High	High	High
FALSE	High	Master Protein	P97441	Zinc transporter 3 OS=Mus musculus OX=10090 GN=Slc30a3 PE=1 SV=1	0	60.981	25	8	23	8	1	388	41.8	6.38	84.19	8	0	1.942	1.098	0.806	1.154	0.89	1.028	1.133	0.908	90.4	175.6	99.2	72.8	104.3	80.4	92.9	102.4	82	High	High	High	High	High	High	High	High	High
FALSE	High	Master Protein	Q8C1B7	Septin-11 OS=Mus musculus OX=10090 GN=Sept11 PE=1 SV=4	0	60.927	29	11	33	4	1	431	49.7	6.68	102.65	11	0	0.01	1.366	1.328	1.33	1.375	1.256	1.353	1.321	87.1		119	115.7	115.9	119.8	109.5	117.8	115.1	High	Not Found	High	High	High	High	High	High	High
FALSE	High	Master Protein	Q8C7M3	E3 ubiquitin-protein ligase TRIM9 OS=Mus musculus OX=10090 GN=Trim9 PE=1 SV=2	0	60.916	17	11	18	11	1	817	90.8	7.24	56.34	11	0	7.502	0.717	0.754	0.708	0.729	0.893	0.723	0.747	65.3	490.2	46.8	49.3	46.3	47.6	58.3	47.3	48.8	High	High	High	High	High	High	High	High	High
FALSE	High	Master Protein	A2AJI0	MAP7 domain-containing protein 1 OS=Mus musculus OX=10090 GN=Map7d1 PE=1 SV=1	0	60.868	18	10	16	10	1	846	93.2	10.15	52.1	10	0	0.24	0.658	0.625	0.667	0.7	0.682	0.603	0.661	154.2	37	101.5	96.4	102.9	107.9	105.2	92.9	101.9	High	High	High	High	High	High	High	High	High
FALSE	High	Master Protein	Q6PDS3	Sterile alpha and TIR motif-containing protein 1 OS=Mus musculus OX=10090 GN=Sarm1 PE=1 SV=1	0	60.827	16	9	12	9	1	724	79.6	6.27	42.31	9	0	2.134	0.977	1.015	1.072	1.175	1.028	0.968	1.076	86.2	183.9	84.2	87.5	92.4	101.2	88.5	83.4	92.7	High	High	High	High	High	High	High	High	High
FALSE	High	Master Protein	P14231	Sodium/potassium-transporting ATPase subunit beta-2 OS=Mus musculus OX=10090 GN=Atp1b2 PE=1 SV=2	0	60.721	24	6	23	6	1	290	33.3	8.31	110.74	6	0	0.115	1.246	1.165	1.267	1.224	1.248	1.344	1.277	91	10.5	113.5	106.1	115.4	111.4	113.6	122.3	116.2	High	High	High	High	High	High	High	High	High
FALSE	High	Master Protein	G3XA57	Rab11 family-interacting protein 2 OS=Mus musculus OX=10090 GN=Rab11fip2 PE=1 SV=1	0	60.63	24	10	23	10	1	512	58.2	9.45	68.26	10	0	0.01	0.857	0.754	0.858	0.785	0.838	0.842	0.757	134.5		115.3	101.4	115.4	105.6	112.7	113.3	101.8	High	Not Found	High	High	High	High	High	High	High
FALSE	High	Master Protein	Q8VHW2	Voltage-dependent calcium channel gamma-8 subunit OS=Mus musculus OX=10090 GN=Cacng8 PE=1 SV=1	0	60.627	28	5	13	5	1	423	43.4	9.2	48.31	5	0	0.485	1.039	0.917	1.116	1.162	1.101	1.105	1.069	100.1	48.5	104	91.8	111.7	116.3	110.2	110.5	107	High	High	High	High	High	High	High	High	High
FALSE	High	Master Protein	P35979	60S ribosomal protein L12 OS=Mus musculus OX=10090 GN=Rpl12 PE=1 SV=2	0	60.101	55	7	19	7	1	165	17.8	9.42	67.07	7	0	0.01	0.846	0.74	0.826	0.682	0.806	0.85	0.715	139.2		117.8	102.9	115	94.9	112.3	118.4	99.6	High	High	High	High	High	High	High	High	High
FALSE	High	Master Protein	P62702	40S ribosomal protein S4, X isoform OS=Mus musculus OX=10090 GN=Rps4x PE=1 SV=2	0	59.973	37	11	31	11	1	263	29.6	10.15	100.59	11	0	1.979	0.324	0.368	0.323	0.379	0.322	0.297	0.362	168.1	332.7	54.4	61.9	54.3	63.7	54.1	50	60.8	High	High	High	High	High	High	High	High	High
FALSE	High	Master Protein	Q8C8R3	Ankyrin-2 OS=Mus musculus OX=10090 GN=Ank2 PE=1 SV=2	0	59.657	5	13	29	10	1	3898	426	5.17	68.28	13	1	0.01	0.595	0.595	0.596	0.679	0.673	0.561	0.634	168.8		100.5	100.4	100.6	114.5	113.6	94.7	107	High	Not Found	High	High	High	High	High	High	High
FALSE	High	Master Protein	O55022	Membrane-associated progesterone receptor component 1 OS=Mus musculus OX=10090 GN=Pgrmc1 PE=1 SV=4	0	59.652	55	8	28	8	1	195	21.7	4.7	97.49	8	0	1.562	0.905	0.766	0.849	0.799	0.885	0.855	0.84	106.4	166.1	96.3	81.5	90.3	85	94.1	90.9	89.3	High	High	High	High	High	High	High	High	High
FALSE	High	Master Protein	Q61361	Brevican core protein OS=Mus musculus OX=10090 GN=Bcan PE=1 SV=2	0	59.421	14	10	19	10	1	883	95.8	4.93	60.01	10	0	0.497	0.703	0.904	0.693	0.918	0.733	0.677	0.875	128.6	63.9	90.4	116.3	89.1	118	94.2	87	112.4	High	High	High	High	High	High	High	High	High
FALSE	High	Master Protein	Q9Z2I9	Succinate--CoA ligase [ADP-forming] subunit beta, mitochondrial OS=Mus musculus OX=10090 GN=Sucla2 PE=1 SV=2	0	59.255	24	11	25	11	1	463	50.1	7.01	78.23	11	0	0.01	1.007	1.441	1.117	1.56	1.087	1.007	1.453	93		93.7	134.1	103.9	145.2	101.2	93.7	135.2	High	High	High	High	High	High	High	High	High
FALSE	High	Master Protein	P08226	Apolipoprotein E OS=Mus musculus OX=10090 GN=Apoe PE=1 SV=2	0	58.74	36	10	33	10	1	311	35.8	5.68	104.67	10	0	1.617	1.051	0.803	1.11	0.877	0.999	1.054	0.962	95	153.6	99.9	76.3	105.5	83.3	94.9	100.2	91.4	High	High	High	High	High	High	High	High	High
FALSE	High	Master Protein	Q8BHL5	Engulfment and cell motility protein 2 OS=Mus musculus OX=10090 GN=Elmo2 PE=1 SV=1	0	58.691	15	8	22	6	1	732	83.8	5.95	68.74	8	0	0.01	0.896	0.897	0.898	0.919	0.901	0.893	0.945	122.4		109.7	109.9	110	112.6	110.3	109.4	115.7	High	Not Found	High	High	High	High	High	High	High
FALSE	High	Master Protein	P61226	Ras-related protein Rap-2b OS=Mus musculus OX=10090 GN=Rap2b PE=1 SV=1	0	58.612	41	6	31	2	1	183	20.5	4.81	91.91	6	3	0.01	1.254	1.332	1.255	1.686	1.165	1.28	1.419	86.6		108.6	115.4	108.7	146.1	100.9	110.8	122.9	High	Not Found	High	High	High	High	High	High	High
FALSE	High	Master Protein	P62746	Rho-related GTP-binding protein RhoB OS=Mus musculus OX=10090 GN=Rhob PE=1 SV=1	0	58.505	37	5	31	4	1	196	22.1	5.24	113.88	5	0	0.01	0.876	0.703	0.879	0.701	0.997	0.871	0.695	133.9		117.2	94.1	117.7	93.9	133.5	116.6	93.1	High	Not Found	High	High	High	High	High	High	High
FALSE	High	Master Protein	O35226	26S proteasome non-ATPase regulatory subunit 4 OS=Mus musculus OX=10090 GN=Psmd4 PE=1 SV=1	0	58.426	28	6	9	6	1	376	40.7	4.79	35.7	6	0	0.01	0.842	1.135	1.255	1.267	1.053	1.332	1.71	93.8		79	106.5	117.8	118.9	98.8	125	160.4	High	Not Found	High	High	High	High	High	High	High
FALSE	High	Master Protein	Q8R3V5	Endophilin-B2 OS=Mus musculus OX=10090 GN=Sh3glb2 PE=1 SV=2	0	58.378	27	12	66	11	1	400	44.5	5.82	196.98	12	1	0.423	1.337	1.191	1.484	1.125	1.288	1.387	1.297	85.5	36.1	114.3	101.8	126.8	96.1	110.1	118.5	110.8	High	High	High	High	High	High	High	High	High
FALSE	High	Master Protein	P67984	60S ribosomal protein L22 OS=Mus musculus OX=10090 GN=Rpl22 PE=1 SV=2	0	58.247	55	5	32	5	1	128	14.8	9.19	70.24	5	0	0.01	0.616	0.472	0.538	0.499	0.592	0.563	0.478	189.1		116.5	89.3	101.8	94.4	112	106.5	90.5	High	Not Found	High	High	High	High	High	High	High
FALSE	High	Master Protein	Q02053	Ubiquitin-like modifier-activating enzyme 1 OS=Mus musculus OX=10090 GN=Uba1 PE=1 SV=1	0	58.23	15	11	15	11	1	1058	117.7	5.66	51.03	11	0	9.146	0.93	0.757	0.952	0.831	1.031	0.879	0.816	55.1	503.7	51.2	41.7	52.4	45.8	56.8	48.4	44.9	High	High	High	High	High	High	High	High	High
FALSE	High	Master Protein	E9PVA8	eIF-2-alpha kinase activator GCN1 OS=Mus musculus OX=10090 GN=Gcn1 PE=1 SV=1	0	58.215	7	12	14	12	1	2671	292.8	7.36	42.4	12	0	0.01	0.862	0.803	0.803	0.834	0.846	0.8	0.81	133.2		114.8	106.9	106.9	111	112.6	106.6	107.9	High	High	High	High	High	High	High	High	High
FALSE	High	Master Protein	P62242	40S ribosomal protein S8 OS=Mus musculus OX=10090 GN=Rps8 PE=1 SV=2	0	58.032	40	8	28	8	1	208	24.2	10.32	87.27	8	0	0.075	0.528	0.669	0.55	0.61	0.531	0.53	0.584	177.3	13.3	93.6	118.6	97.4	108.1	94.2	94	103.5	High	High	High	High	High	High	High	High	High
FALSE	High	Master Protein	Q02357	Ankyrin-1 OS=Mus musculus OX=10090 GN=Ank1 PE=1 SV=2	0	57.996	9	13	29	11	1	1862	204.1	6.55	71.61	13	0	0.01	0.83	0.832	0.771	0.807	0.826	0.752	0.771	136.6		113.4	113.7	105.3	110.3	112.8	102.7	105.3	High	High	High	High	High	High	High	High	High
FALSE	High	Master Protein	P54775	26S proteasome regulatory subunit 6B OS=Mus musculus OX=10090 GN=Psmc4 PE=1 SV=2	0	57.784	36	10	22	9	1	418	47.4	5.21	72.11	10	0	0.01	1.003	1.225	1.085	1.168	1.015	1.002	1.171	103.8		104.1	127.2	112.6	121.3	105.4	104	121.6	High	High	High	High	High	High	High	High	High
FALSE	High	Master Protein	Q9CYZ2	Tumor protein D54 OS=Mus musculus OX=10090 GN=Tpd52l2 PE=1 SV=1	0	57.745	40	10	23	10	1	220	24	6.15	57.37	10	0	1.834	0.753	0.643	0.712	0.672	0.657	0.652	0.652	118.8	217.9	89.5	76.4	84.6	79.8	78	77.5	77.4	High	High	High	High	High	High	High	High	High
FALSE	High	Master Protein	P99029	Peroxiredoxin-5, mitochondrial OS=Mus musculus OX=10090 GN=Prdx5 PE=1 SV=2	0	57.724	39	6	19	6	1	210	21.9	8.85	81.74	6	0	0.532	1.23	1.318	1.265	1.412	1.314	1.241	1.345	84.4	45	103.9	111.3	106.8	119.2	110.9	104.8	113.6	High	High	High	High	High	High	High	High	High
FALSE	High	Master Protein	Q9WU78	Programmed cell death 6-interacting protein OS=Mus musculus OX=10090 GN=Pdcd6ip PE=1 SV=3	0	57.614	16	9	14	9	1	869	96	6.52	51.6	9	0	0.01	1.371	1.179	1.607	1.341	1.447	1.41	1.073	86.3		118.3	101.8	138.7	115.7	124.9	121.7	92.6	High	Not Found	High	High	High	High	High	High	High
FALSE	High	Master Protein	P02089	Hemoglobin subunit beta-2 OS=Mus musculus OX=10090 GN=Hbb-b2 PE=1 SV=2	0	57.534	43	5	18	2	1	147	15.9	8.05	76.65	5	0	0.01	0.598	0.588	0.61	0.647	0.568	0.583	0.613	172.9		103.3	101.6	105.5	111.8	98.3	100.8	105.9	High	Not Found	High	High	High	High	High	High	High
FALSE	High	Master Protein	E9Q8I9	Protein furry homolog OS=Mus musculus OX=10090 GN=Fry PE=1 SV=1	0	57.392	8	16	18	16	1	3020	338.9	6.01	50.16	16	0	0.01	0.987	1.09	1.035	1.268	0.957	0.949	1.072	107.7		106.3	117.4	111.5	136.5	103.1	102.2	115.4	High	High	High	High	High	High	High	High	High
FALSE	High	Master Protein	Q7TT50	Serine/threonine-protein kinase MRCK beta OS=Mus musculus OX=10090 GN=Cdc42bpb PE=1 SV=2	0	57.37	11	18	22	15	1	1713	194.6	6.46	49.8	18	2	0.876	0.997	0.878	1.055	0.988	0.992	0.982	0.914	103.7	90.8	103.4	91	109.3	102.4	102.8	101.8	94.8	High	High	High	High	High	High	High	High	High
FALSE	High	Master Protein	O55029	Coatomer subunit beta' OS=Mus musculus OX=10090 GN=Copb2 PE=1 SV=2	0	56.904	11	8	21	8	1	905	102.4	5.3	66.47	8	0	0.01	1.048	1.255	1.146	1.266	1.084	1.108	1.252	98.3		102.9	123.3	112.7	124.4	106.5	108.8	123	High	High	High	High	High	High	High	High	High
FALSE	High	Master Protein	O08917	Flotillin-1 OS=Mus musculus OX=10090 GN=Flot1 PE=1 SV=1	0	56.875	26	10	17	10	1	428	47.5	7.15	51.49	10	0	0.395	0.943	0.74	0.875	0.84	0.883	0.839	0.947	120.6	47.7	113.7	89.2	105.6	101.4	106.5	101.2	114.3	High	High	High	High	High	High	High	High	High
FALSE	High	Master Protein	Q6PA06	Atlastin-2 OS=Mus musculus OX=10090 GN=Atl2 PE=1 SV=1	0	56.774	16	7	12	6	1	583	66.2	5.43	51.53	7	0	2.175	0.799	0.839	0.884	0.96	0.86	0.842	0.955	96.6	210.1	77.2	81.1	85.5	92.7	83.1	81.4	92.3	High	High	High	High	High	High	High	High	High
FALSE	High	Master Protein	Q922R8	Protein disulfide-isomerase A6 OS=Mus musculus OX=10090 GN=Pdia6 PE=1 SV=3	0	56.66	27	7	19	7	1	440	48.1	5.14	63.67	7	0	0.01	0.878	0.833	0.962	0.978	0.968	0.928	0.974	119.7		105.1	99.7	115.1	117.1	115.8	111	116.5	High	Not Found	High	High	High	High	High	High	High
FALSE	High	Master Protein	P47955	60S acidic ribosomal protein P1 OS=Mus musculus OX=10090 GN=Rplp1 PE=1 SV=1	0	56.549	67	3	10	3	1	114	11.5	4.32	58.47	3	0	0.01	0.577	0.587	0.64	0.663	0.64	0.635	0.607	168.3		97.1	98.7	107.8	111.5	107.7	106.9	102.2	High	Not Found	High	High	High	High	High	High	High
FALSE	High	Master Protein	Q9JKK1	Syntaxin-6 OS=Mus musculus OX=10090 GN=Stx6 PE=1 SV=1	0	56.509	56	7	33	7	1	255	29	4.92	100.88	7	0	0.118	0.906	0.891	0.968	0.973	0.973	0.957	1.007	115.5	13.6	104.6	102.9	111.8	112.4	112.4	110.6	116.3	High	High	High	High	High	High	High	High	High
FALSE	High	Master Protein	Q8BG32	26S proteasome non-ATPase regulatory subunit 11 OS=Mus musculus OX=10090 GN=Psmd11 PE=1 SV=3	0	56.461	20	7	19	7	1	422	47.4	6.48	56.9	7	0	0.01	1.33	1.434	1.39	1.603	1.334	1.343	1.479	82.5		109.7	118.2	114.7	132.2	110	110.8	122	High	High	High	High	High	High	High	High	High
FALSE	High	Master Protein	P47963	60S ribosomal protein L13 OS=Mus musculus OX=10090 GN=Rpl13 PE=1 SV=3	0	56.251	41	11	30	11	1	211	24.3	11.55	85.69	11	0	0.01	0.701	0.667	0.682	0.676	0.672	0.714	0.645	156.4		109.6	104.2	106.7	105.7	105	111.6	100.8	High	High	High	High	High	High	High	High	High
FALSE	High	Master Protein	O08795	Glucosidase 2 subunit beta OS=Mus musculus OX=10090 GN=Prkcsh PE=1 SV=1	0	56.178	20	10	16	10	1	521	58.8	4.46	58.27	10	0	0.01	0.86	0.865	0.912	0.943	0.924	0.839	0.971	123		105.8	106.5	112.2	116.1	113.7	103.3	119.4	High	Not Found	High	High	High	High	High	High	High
FALSE	High	Master Protein	P46638	Ras-related protein Rab-11B OS=Mus musculus OX=10090 GN=Rab11b PE=1 SV=3	0	56.124	49	11	83	11	1	218	24.5	5.94	249.61	11	0	0.01	0.908	0.713	0.921	0.694	0.855	0.909	0.744	133.4		121.2	95.2	122.9	92.6	114.1	121.4	99.3	High	High	High	High	High	High	High	High	High
FALSE	High	Master Protein	Q00493	Carboxypeptidase E OS=Mus musculus OX=10090 GN=Cpe PE=1 SV=2	0	56.107	26	11	31	11	1	476	53.2	5.19	90.65	11	0	1.135	1.011	0.995	1.04	0.991	1.084	1.028	1.047	96.4	109.4	97.5	96	100.3	95.6	104.6	99.2	101	High	High	High	High	High	High	High	High	High
FALSE	High	Master Protein	Q9Z0N1	Eukaryotic translation initiation factor 2 subunit 3, X-linked OS=Mus musculus OX=10090 GN=Eif2s3x PE=1 SV=2	0	55.604	29	10	19	10	1	472	51	8.4	67.67	10	0	1.284	0.878	0.907	0.858	0.893	1.204	0.851	0.867	103	132.2	90.4	93.4	88.3	91.9	124	87.6	89.2	High	High	High	High	High	High	High	High	High
FALSE	High	Master Protein	Q69Z98	Serine/threonine-protein kinase BRSK2 OS=Mus musculus OX=10090 GN=Brsk2 PE=1 SV=2	0	55.503	18	11	27	7	1	735	81.7	8.79	77.62	11	0	0.01	1.216	1.053	1.281	1.028	1.169	1.168	1.07	100.2		121.8	105.5	128.3	103	117.1	117	107.2	High	Not Found	High	High	High	High	High	High	High
FALSE	High	Master Protein	Q61207	Prosaposin OS=Mus musculus OX=10090 GN=Psap PE=1 SV=2	0	55.484	16	8	55	8	1	557	61.4	5.19	133.16	8	0	0.716	1.214	1.371	1.331	1.323	1.304	1.393	1.515	80.6	57.7	97.8	110.5	107.3	106.6	105.1	112.2	122.1	High	High	High	High	High	High	High	High	High
FALSE	High	Master Protein	Q8BHL3	TBC1 domain family member 10B OS=Mus musculus OX=10090 GN=Tbc1d10b PE=1 SV=2	0	55.445	19	7	17	7	1	798	87.2	8.9	59.87	7	0	0.01	1.002	0.846	0.969	0.898	1.004	0.932	0.866	119.7		120	101.3	116	107.5	120.2	111.5	103.7	High	Not Found	High	High	High	High	High	High	High
FALSE	High	Master Protein	P70296	Phosphatidylethanolamine-binding protein 1 OS=Mus musculus OX=10090 GN=Pebp1 PE=1 SV=3	0	55.366	55	6	16	6	1	187	20.8	5.4	53.08	6	0	0.01	1.129	1.066	1.091	1.162	1.128	1.174	1.191	100.7		113.7	107.3	109.8	117	113.6	118.1	119.9	High	Not Found	High	High	High	High	High	High	High
FALSE	High	Master Protein	Q68FL4	Putative adenosylhomocysteinase 3 OS=Mus musculus OX=10090 GN=Ahcyl2 PE=1 SV=1	0	54.833	17	10	29	1	1	613	66.9	7.36	78.75	10	0	0.01	1.645	1.25	1.122	1.18	1.209	0.979	1.364	92.3		151.8	115.4	103.5	108.9	111.6	90.4	125.9	High	Not Found	High	High	High	High	High	High	High
FALSE	High	Master Protein	P25444	40S ribosomal protein S2 OS=Mus musculus OX=10090 GN=Rps2 PE=1 SV=3	0	54.813	31	10	36	10	1	293	31.2	10.24	94.77	10	0	0.086	0.354	0.333	0.36	0.382	0.368	0.37	0.37	248.5	21.4	88	82.8	89.4	94.8	91.3	91.9	91.9	High	High	High	High	High	High	High	High	High
FALSE	High	Master Protein	Q3U214	Microtubule-associated serine/threonine-protein kinase 3 OS=Mus musculus OX=10090 GN=Mast3 PE=1 SV=3	0	54.724	12	10	11	8	1	1321	144.1	8.44	41.61	10	0	0.01	0.892	0.824	0.788	0.963	0.914	0.737	0.865	128.9		115	106.1	101.6	124.1	117.8	95	111.6	High	Not Found	High	High	High	High	High	High	High
FALSE	High	Master Protein	P62908	40S ribosomal protein S3 OS=Mus musculus OX=10090 GN=Rps3 PE=1 SV=1	0	54.605	40	9	32	9	1	243	26.7	9.66	86.25	9	0	0.01	0.315	0.31	0.321	0.317	0.308	0.312	0.307	282.1		88.8	87.3	90.5	89.6	86.9	88.1	86.6	High	Not Found	High	High	High	High	High	High	High
FALSE	High	Master Protein	Q8CGY8	UDP-N-acetylglucosamine--peptide N-acetylglucosaminyltransferase 110 kDa subunit OS=Mus musculus OX=10090 GN=Ogt PE=1 SV=2	0	54.561	11	9	31	9	1	1046	116.9	6.7	72.58	9	0	0.01	0.703	0.911	0.765	0.945	0.839	0.678	0.827	135		94.9	123	103.2	127.6	113.2	91.5	111.7	High	High	High	High	High	High	High	High	High
FALSE	High	Master Protein	P33175	Kinesin heavy chain isoform 5A OS=Mus musculus OX=10090 GN=Kif5a PE=1 SV=3	0	54.558	14	12	28	3	1	1027	116.9	5.94	68.51	12	0	0.01	1.126	1.418	1.271	1.486	1.186	1.135	1.449	89.4		100.6	126.7	113.6	132.8	106	101.4	129.5	High	Not Found	High	High	High	High	High	High	High
FALSE	High	Master Protein	Q61316	Heat shock 70 kDa protein 4 OS=Mus musculus OX=10090 GN=Hspa4 PE=1 SV=1	0	54.323	12	8	11	7	1	841	94.1	5.24	37.45	8	0	0.01	1.238	1.025	1.137	1.138	1.043	1.025	1.176	102.5		126.9	105	116.5	116.6	106.9	105.1	120.5	High	Not Found	High	High	High	High	High	High	High
FALSE	High	Master Protein	Q9CQ19	Myosin regulatory light polypeptide 9 OS=Mus musculus OX=10090 GN=Myl9 PE=1 SV=3	0	54.26	60	9	25	3	1	172	19.8	4.92	75.17	9	0	0.01	0.788	0.856	0.759	0.788	0.678	0.659	0.862	140.8		110.9	120.5	106.9	111	95.5	92.8	121.4	High	Not Found	High	High	High	High	High	High	High
FALSE	High	Master Protein	Q91VR5	ATP-dependent RNA helicase DDX1 OS=Mus musculus OX=10090 GN=Ddx1 PE=1 SV=1	0	54.237	15	11	29	11	1	740	82.4	7.21	78.58	11	0	0.01	0.725	0.776	0.865	0.904	0.787	0.774	0.827	135.2		98	104.9	116.9	122.3	106.3	104.6	111.8	High	High	High	High	High	High	High	High	High
FALSE	High	Master Protein	P09411	Phosphoglycerate kinase 1 OS=Mus musculus OX=10090 GN=Pgk1 PE=1 SV=4	0	54.121	24	8	32	8	1	417	44.5	7.9	109.91	8	0	0.01	1.049	1.002	1.129	1.093	1.072	1.133	1.064	105.4		110.6	105.6	118.9	115.2	113	119.4	112.1	High	High	High	High	High	High	High	High	High
FALSE	High	Master Protein	P97351	40S ribosomal protein S3a OS=Mus musculus OX=10090 GN=Rps3a PE=1 SV=3	0	54.117	39	15	49	15	1	264	29.9	9.73	124.24	15	0	0.29	0.194	0.156	0.197	0.221	0.23	0.192	0.207	334.9	97.1	65.1	52.2	66.1	74.2	77	64.3	69.2	High	High	High	High	High	High	High	High	High
FALSE	High	Master Protein	P01671	Ig kappa chain V-III region PC 7175 OS=Mus musculus OX=10090 PE=1 SV=1	0	54.065	74	5	40	2	1	111	12	7.37	200.86	5	2	1.871	0.851	2.186	0.88	2.459	0.918	0.787	2.334	67.7	126.7	57.7	148.1	59.6	166.6	62.2	53.3	158.1	High	Not Found	High	High	High	High	High	High	High
FALSE	High	Master Protein	P56564	Excitatory amino acid transporter 1 OS=Mus musculus OX=10090 GN=Slc1a3 PE=1 SV=2	0	54	17	8	9	8	1	543	59.6	8.4	41.86	8	0	0.866	1.133	1.114	1.077	1.081	1.083	1.17	1.029	94.2	81.6	106.8	104.9	101.5	101.8	102	110.2	97	High	High	High	High	High	High	High	High	High
FALSE	High	Master Protein	P60202	Myelin proteolipid protein OS=Mus musculus OX=10090 GN=Plp1 PE=1 SV=2	0	53.961	26	7	55	7	1	277	30.1	8.35	176.82	7	0	0.579	0.912	0.976	0.928	0.989	0.893	0.968	0.88	110.8	64.1	101.1	108.1	102.8	109.6	98.9	107.2	97.5	High	High	High	High	High	High	High	High	High
FALSE	High	Master Protein	P59279	Ras-related protein Rab-2B OS=Mus musculus OX=10090 GN=Rab2b PE=1 SV=1	0	53.362	36	7	22	1	1	216	24.2	6.68	74.32	7	0																		High	Not Found	High	High	High	High	High	High	High
FALSE	High	Master Protein	P35700	Peroxiredoxin-1 OS=Mus musculus OX=10090 GN=Prdx1 PE=1 SV=1	0	53.255	50	10	41	8	1	199	22.2	8.12	119.71	10	2	1.323	0.986	0.984	0.957	0.918	0.994	0.967	0.916	99.5	131.7	98.1	97.9	95.2	91.3	98.9	96.2	91.2	High	High	High	High	High	High	High	High	High
FALSE	High	Master Protein	Q9D7G0	Ribose-phosphate pyrophosphokinase 1 OS=Mus musculus OX=10090 GN=Prps1 PE=1 SV=4	0	53.243	28	7	11	7	1	318	34.8	6.98	40.67	7	0	0.01	0.899	1.204	1.216	1.278	0.965	0.956	1.212	103.1		92.7	124.1	125.4	131.8	99.5	98.6	124.9	High	Not Found	High	High	High	High	High	High	High
FALSE	High	Master Protein	Q9WVR4	Fragile X mental retardation syndrome-related protein 2 OS=Mus musculus OX=10090 GN=Fxr2 PE=1 SV=1	0	53.078	19	8	16	7	1	673	73.7	6.23	54.48	8	0	0.01	0.709	0.69	0.705	0.809	0.934	0.72	0.779	141.9		100.5	97.8	100	114.8	132.5	102.1	110.5	High	Not Found	High	High	High	High	High	High	High
FALSE	High	Master Protein	Q61548	Clathrin coat assembly protein AP180 OS=Mus musculus OX=10090 GN=Snap91 PE=1 SV=1	0	53.072	12	6	26	6	1	901	91.8	4.88	68.46	6	0	0.01	1.012	0.935	1.176	1.049	1.035	1.083	0.991	108.7		110	101.6	127.8	114.1	112.4	117.7	107.7	High	Not Found	High	High	High	High	High	High	High
FALSE	High	Master Protein	O88447	Kinesin light chain 1 OS=Mus musculus OX=10090 GN=Klc1 PE=1 SV=3	0	52.958	22	10	15	6	1	541	61.4	5.68	54.87	10	0	0.01	1.343	1.356	1.266	1.201	1.236	1.142	1.171	92.6		124.5	125.6	117.3	111.3	114.5	105.8	108.5	High	Not Found	High	High	High	High	High	High	High
FALSE	High	Master Protein	Q8BSS9	Liprin-alpha-2 OS=Mus musculus OX=10090 GN=Ppfia2 PE=1 SV=2	0	52.803	12	11	14	9	1	1257	143.1	6.11	39.73	11	0	7.898	1.022	1.103	1.051	1.163	1.036	0.942	1.2	54.8	433	56	60.5	57.6	63.8	56.8	51.6	65.8	High	High	High	High	High	High	High	High	High
FALSE	High	Master Protein	P03977	Ig kappa chain V-III region 50S10.1 OS=Mus musculus OX=10090 PE=1 SV=1	0	52.74	46	4	46	1	1	111	12	5.06	207.5	4	0	0.01	0.811	3.628	0.855	3.261	0.768	0.671	2.885	64.8		52.6	235.3	55.5	211.4	49.8	43.5	187.1	High	Not Found	High	High	High	High	High	High	High
FALSE	High	Master Protein	P61028	Ras-related protein Rab-8B OS=Mus musculus OX=10090 GN=Rab8b PE=1 SV=1	0	52.711	33	8	87	2	1	207	23.6	9.07	262.39	8	1	3.617	0.848	0.803	0.87	0.85	0.858	0.863	0.841	85.3	308.5	72.3	68.5	74.2	72.5	73.2	73.6	71.7	High	High	High	High	High	High	High	High	High
FALSE	High	Master Protein	P84086	Complexin-2 OS=Mus musculus OX=10090 GN=Cplx2 PE=1 SV=1	0	52.703	54	6	24	4	1	134	15.4	5.08	108.26	6	1	1.515	1.309	0.961	1.367	0.977	1.305	1.229	0.977	84.6	128.2	110.7	81.3	115.6	82.6	110.4	103.9	82.6	High	Not Found	High	High	High	High	High	High	High
FALSE	High	Master Protein	Q8CHH9	Septin-8 OS=Mus musculus OX=10090 GN=Sept8 PE=1 SV=4	0	52.667	21	8	29	4	1	429	49.8	6	92.04	8	0	0.01	1.264	1.234	1.363	1.406	1.191	1.325	1.306	89.2		112.7	110.1	121.6	125.4	106.2	118.2	116.5	High	Not Found	High	High	High	High	High	High	High
FALSE	High	Master Protein	Q62443	Neuronal pentraxin-1 OS=Mus musculus OX=10090 GN=Nptx1 PE=1 SV=1	0	52.644	18	7	20	7	1	432	47.1	6.44	71.1	7	0	2.235	1.095	1.005	1.217	1.127	1.125	1.178	1.13	81	181	88.7	81.4	98.6	91.3	91.1	95.4	91.5	High	High	High	High	High	High	High	High	High
FALSE	High	Master Protein	P58771	Tropomyosin alpha-1 chain OS=Mus musculus OX=10090 GN=Tpm1 PE=1 SV=1	0	52.616	37	15	31	5	1	284	32.7	4.74	84.93	15	6	0.215	0.924	1.06	0.822	1.001	0.949	0.844	1.058	114.3	24.6	105.6	121.2	94	114.4	108.5	96.4	120.9	High	High	High	High	High	High	High	High	High
FALSE	High	Master Protein	Q6PDL0	Cytoplasmic dynein 1 light intermediate chain 2 OS=Mus musculus OX=10090 GN=Dync1li2 PE=1 SV=2	0	52.466	20	9	34	9	1	492	54.2	6.28	94.48	9	0	0.259	1.207	1.377	0.843	1.139	1.309	1.166	1.443	92.4	23.9	111.5	127.2	77.9	105.2	120.9	107.7	133.3	High	High	High	High	High	High	High	High	High
FALSE	High	Master Protein	P32037	Solute carrier family 2, facilitated glucose transporter member 3 OS=Mus musculus OX=10090 GN=Slc2a3 PE=1 SV=1	0	52.433	10	7	37	7	1	493	53.4	4.98	103.88	7	0	0.539	1.616	1.133	1.529	1.115	1.362	1.589	1.075	82.1	44.2	132.7	93.1	125.6	91.6	111.9	130.5	88.3	High	High	High	High	High	High	High	High	High
FALSE	High	Master Protein	Q9Z2H2	Regulator of G-protein signaling 6 OS=Mus musculus OX=10090 GN=Rgs6 PE=1 SV=2	0	52.31	23	10	19	7	1	472	54.5	7.42	59.08	10	2	0.01	0.998	1.018	1.076	1.111	1.093	1.039	1.103	106.7		106.4	108.6	114.8	118.5	116.5	110.8	117.7	High	Not Found	High	High	High	High	High	High	High
FALSE	High	Master Protein	P62983	Ubiquitin-40S ribosomal protein S27a OS=Mus musculus OX=10090 GN=Rps27a PE=1 SV=2	0	52.243	53	7	38	7	1	156	17.9	9.64	126.69	7	0	0.621	0.843	0.74	0.856	0.824	0.894	0.817	0.74	122.7	76.3	103.4	90.8	105.1	101.1	109.7	100.3	90.7	High	High	High	High	High	High	High	High	High
FALSE	High	Master Protein	P31650	Sodium- and chloride-dependent GABA transporter 3 OS=Mus musculus OX=10090 GN=Slc6a11 PE=1 SV=2	0	52.178	8	6	19	6	1	627	69.9	6.98	70.01	6	0	0.247	1.235	1.219	1.3	1.442	1.205	1.387	1.287	87.2	21.5	107.7	106.3	113.3	125.8	105.1	120.9	112.2	High	High	High	High	High	High	High	High	High
FALSE	High	Master Protein	F6SEU4	Ras/Rap GTPase-activating protein SynGAP OS=Mus musculus OX=10090 GN=Syngap1 PE=1 SV=2	0	52.153	8	9	18	8	1	1340	148.1	8.98	55.63	9	0	0.524	0.736	0.775	0.787	0.771	0.733	0.737	0.727	132.5	69.5	97.6	102.7	104.3	102.2	97.1	97.6	96.4	High	High	High	High	High	High	High	High	High
FALSE	High	Master Protein	Q8BVI5	Syntaxin-16 OS=Mus musculus OX=10090 GN=Stx16 PE=1 SV=3	0	51.938	19	6	19	6	1	326	37.1	5.86	66.97	6	0	0.01	1.093	0.916	0.968	0.907	1.027	0.991	0.999	113.9		124.5	104.3	110.3	103.3	117	112.8	113.8	High	Not Found	High	High	High	High	High	High	High
FALSE	High	Master Protein	P56695	Wolframin OS=Mus musculus OX=10090 GN=Wfs1 PE=1 SV=1	0	51.898	12	9	16	9	1	890	100.5	7.97	44.66	9	0	0.832	0.775	0.78	0.86	0.936	0.855	0.835	0.856	116.5	96.9	90.2	90.9	100.1	109	99.5	97.2	99.7	High	High	High	High	High	High	High	High	High
FALSE	High	Master Protein	Q9D8E6	60S ribosomal protein L4 OS=Mus musculus OX=10090 GN=Rpl4 PE=1 SV=3	0	51.875	23	9	16	9	1	419	47.1	11	60.98	9	0	0.01	0.768	0.814	0.771	0.796	0.762	0.782	0.743	139.9		107.4	113.8	107.8	111.3	106.6	109.4	103.8	High	High	High	High	High	High	High	High	High
FALSE	High	Master Protein	Q5DU25	IQ motif and SEC7 domain-containing protein 2 OS=Mus musculus OX=10090 GN=Iqsec2 PE=1 SV=3	0	51.874	13	13	26	9	1	1478	161.7	8.56	58.04	13	0	2.198	0.805	0.826	0.858	0.876	0.911	0.754	0.795	99.8	219.2	80.3	82.4	85.6	87.4	90.8	75.2	79.3	High	High	High	High	High	High	High	High	High
FALSE	High	Master Protein	Q8BL86	Metallo-beta-lactamase domain-containing protein 2 OS=Mus musculus OX=10090 GN=Mblac2 PE=1 SV=2	0	51.85	36	9	26	9	1	279	31.2	6.86	80.61	9	0	3.677	0.994	0.854	1.03	0.896	1.032	1.003	0.89	79.1	290.9	78.6	67.5	81.5	70.9	81.6	79.3	70.4	High	High	High	High	High	High	High	High	High
FALSE	High	Master Protein	P01801	Ig heavy chain V-III region J606 OS=Mus musculus OX=10090 PE=1 SV=1	0	51.774	38	5	34	5	1	115	12.8	7.12	111.81	5	0	1.56	0.899	2.821	0.934	3.023	0.919	0.86	2.839	60.6	94.5	54.5	170.9	56.6	183.2	55.7	52.1	172	High	High	High	High	High	High	High	High	High
FALSE	High	Master Protein	Q4KUS2	Protein unc-13 homolog A OS=Mus musculus OX=10090 GN=Unc13a PE=1 SV=3	0	51.694	7	8	11	6	1	1712	193.7	5.25	36.61	8	0	0.01	0.571	0.512	0.654	0.55	0.49	0.538	0.491	187.3		106.9	95.9	122.6	103	91.7	100.7	91.9	High	Not Found	High	High	High	High	High	High	High
FALSE	High	Master Protein	Q6P8X1	Sorting nexin-6 OS=Mus musculus OX=10090 GN=Snx6 PE=1 SV=2	0	51.588	27	9	16	9	1	406	46.6	6.16	46.68	9	0	0.01	1.412	1.127	1.365	1.092	1.314	1.452	1.16	90.7		128.1	102.2	123.8	99.1	119.2	131.7	105.2	High	Not Found	High	High	High	High	High	High	High
FALSE	High	Master Protein	O35136	Neural cell adhesion molecule 2 OS=Mus musculus OX=10090 GN=Ncam2 PE=1 SV=1	0	51.586	14	11	18	11	1	837	93.1	6.07	55.25	11	0	0.01	1.071	0.95	1.076	0.952	1.04	1.071	0.976	110.6		118.5	105.1	119	105.3	115.1	118.5	108	High	High	High	High	High	High	High	High	High
FALSE	High	Master Protein	P01654	Ig kappa chain V-III region PC 2880/PC 1229 OS=Mus musculus OX=10090 PE=1 SV=1	0	51.57	46	4	44	1	1	111	12	5.34	199.87	4	1	0.01	0.791	1.626	0.756	1.854	0.683	0.682	1.781	98.1		77.6	159.5	74.2	181.9	67	66.9	174.8	High	High	High	High	High	High	High	High	High
FALSE	High	Master Protein	Q01405	Protein transport protein Sec23A OS=Mus musculus OX=10090 GN=Sec23a PE=1 SV=2	0	51.57	16	10	19	10	1	765	86.1	7.08	56.2	10	0	0.01	0.866	0.933	0.857	0.936	0.858	0.734	0.903	127		110	118.5	108.8	118.9	108.9	93.2	114.7	High	Not Found	High	High	High	High	High	High	High
FALSE	High	Master Protein	P62264	40S ribosomal protein S14 OS=Mus musculus OX=10090 GN=Rps14 PE=1 SV=3	0	51.547	35	6	14	6	1	151	16.3	10.05	61.11	6	0	1.458	0.548	0.483	0.523	0.529	0.519	0.465	0.556	148	215.8	81	71.4	77.4	78.3	76.9	68.9	82.4	High	High	High	High	High	High	High	High	High
FALSE	High	Master Protein	Q9CR95	Adaptin ear-binding coat-associated protein 1 OS=Mus musculus OX=10090 GN=Necap1 PE=1 SV=2	0	51.456	30	8	23	8	1	275	29.6	6.38	85.62	8	0	0.01	1.36	1.077	1.386	1.117	1.184	1.539	1.225	91		123.8	98	126.2	101.7	107.7	140	111.5	High	High	High	High	High	High	High	High	High
FALSE	High	Master Protein	Q99KI0	Aconitate hydratase, mitochondrial OS=Mus musculus OX=10090 GN=Aco2 PE=1 SV=1	0	51.307	17	10	12	10	1	780	85.4	7.93	39.23	10	0	5.03	0.659	0.599	0.63	0.602	0.921	0.561	0.612	84.8	426.5	55.9	50.8	53.4	51	78.1	47.6	51.9	High	High	High	High	High	High	High	High	High
FALSE	High	Master Protein	P63005	Platelet-activating factor acetylhydrolase IB subunit alpha OS=Mus musculus OX=10090 GN=Pafah1b1 PE=1 SV=2	0	51.219	22	7	17	6	1	410	46.6	7.37	63.57	7	1	2.202	1.431	1.471	1.503	1.401	1.196	1.449	1.314	69.4	152.8	99.3	102.1	104.3	97.2	83	100.5	91.2	High	High	High	High	High	High	High	High	High
FALSE	High	Master Protein	Q9Z1S5	Neuronal-specific septin-3 OS=Mus musculus OX=10090 GN=Sept3 PE=1 SV=2	0	51.115	25	8	27	8	1	350	40	6.81	94.62	8	0	0.278	0.784	0.792	0.793	0.806	0.918	0.808	0.804	128.9	35.8	101.1	102	102.2	103.9	118.3	104.2	103.6	High	High	High	High	High	High	High	High	High
FALSE	High	Master Protein	Q61937	Nucleophosmin OS=Mus musculus OX=10090 GN=Npm1 PE=1 SV=1	0	50.866	38	9	22	9	1	292	32.5	4.77	68.86	9	0	0.532	0.475	0.644	0.468	0.689	0.451	0.445	0.638	168.5	89.7	80.1	108.5	78.9	116	76	75	107.4	High	High	High	High	High	High	High	High	High
FALSE	High	Master Protein	Q80TV8	CLIP-associating protein 1 OS=Mus musculus OX=10090 GN=Clasp1 PE=1 SV=2	0	50.854	11	15	18	13	1	1535	169.1	9.03	41.54	15	0	0.459	0.593	0.547	0.617	0.595	0.585	0.563	0.568	162.8	74.8	96.5	89.1	100.5	96.8	95.3	91.6	92.6	High	High	High	High	High	High	High	High	High
FALSE	High	Master Protein	Q61490	CD166 antigen OS=Mus musculus OX=10090 GN=Alcam PE=1 SV=3	0	50.845	16	8	15	8	1	583	65.1	6.15	50.48	8	0	4.296	0.987	0.959	1.066	1.094	0.984	1.013	1.056	72.3	310.4	71.3	69.3	77	79	71.1	73.2	76.3	High	High	High	High	High	High	High	High	High
FALSE	High	Master Protein	P62835	Ras-related protein Rap-1A OS=Mus musculus OX=10090 GN=Rap1a PE=1 SV=1	0	50.815	52	9	21	3	1	184	21	6.67	64.22	9	4	0.01	1.256	1.124	1.276	1.056	1.218	1.284	1.106	96.6		121.3	108.5	123.2	102	117.6	124	106.8	High	Not Found	High	High	High	High	High	High	High
FALSE	High	Master Protein	Q5SSM3	Rho GTPase-activating protein 44 OS=Mus musculus OX=10090 GN=Arhgap44 PE=1 SV=1	0	50.778	14	9	13	9	1	814	88.9	6.6	42.01	9	0	0.01	1.004	0.803	0.999	0.888	0.806	0.904	0.905	123.2		123.6	98.9	123	109.3	99.2	111.3	111.5	High	High	High	High	High	High	High	High	High
FALSE	High	Master Protein	P01872	Immunoglobulin heavy constant mu OS=Mus musculus OX=10090 GN=Ighm PE=1 SV=2	0	50.762	16	6	18	6	1	454	49.9	7.01	56.96	6	0	0.363	0.442	1.134	0.387	1.189	0.419	0.351	1.061	141.8	51.5	62.7	160.8	54.9	168.6	59.5	49.7	150.5	High	High	High	High	High	High	High	High	High
FALSE	High	Master Protein	Q9JI91	Alpha-actinin-2 OS=Mus musculus OX=10090 GN=Actn2 PE=1 SV=2	0	50.751	12	8	13	5	1	894	103.8	5.45	45.76	8	0	2.901	0.456	0.544	0.455	0.582	0.499	0.39	0.628	120.7	350.2	55.1	65.6	55	70.2	60.2	47.1	75.8	High	High	High	High	High	High	High	High	High
FALSE	High	Master Protein	P47962	60S ribosomal protein L5 OS=Mus musculus OX=10090 GN=Rpl5 PE=1 SV=3	0	50.71	32	12	26	12	1	297	34.4	9.77	70.97	12	0	0.01	0.75	0.731	0.775	0.779	0.771	0.777	0.743	142.3		106.7	104	110.3	110.9	109.7	110.5	105.7	High	High	High	High	High	High	High	High	High
FALSE	High	Master Protein	Q6P5E8	Diacylglycerol kinase theta OS=Mus musculus OX=10090 GN=Dgkq PE=1 SV=1	0	50.69	17	10	19	10	1	934	102.2	7.52	54.44	10	0	0.705	1.433	1.226	1.426	1.312	1.392	1.399	1.298	80.4	56.7	115.2	98.6	114.7	105.5	112	112.5	104.4	High	High	High	High	High	High	High	High	High
FALSE	High	Master Protein	P62748	Hippocalcin-like protein 1 OS=Mus musculus OX=10090 GN=Hpcal1 PE=1 SV=2	0	50.618	49	10	24	2	1	193	22.3	5.5	74.3	10	0	0.01	1.286	0.864	0.987	0.63	0.955	1.027	0.57	123		158.1	106.3	121.3	77.4	117.4	126.3	70.1	High	High	High	High	High	High	High	High	High
FALSE	High	Master Protein	A2A690	Protein TANC2 OS=Mus musculus OX=10090 GN=Tanc2 PE=1 SV=1	0	50.546	8	10	13	10	1	1994	220.1	7.97	36.61	10	0	0.01	0.725	0.995	0.639	0.696	0.702	0.682	0.68	147.1		106.6	146.4	94	102.3	103.3	100.3	100	High	Not Found	High	High	High	High	High	High	High
FALSE	High	Master Protein	Q80TZ3	Putative tyrosine-protein phosphatase auxilin OS=Mus musculus OX=10090 GN=Dnajc6 PE=1 SV=2	0	50.54	9	9	34	9	1	938	102.2	7.23	97.05	9	0	0.386	1.218	1.16	1.317	1.202	1.259	1.288	1.223	89.5	34.6	109	103.8	117.9	107.6	112.7	115.3	109.5	High	High	High	High	High	High	High	High	High
FALSE	High	Master Protein	P24668	Cation-dependent mannose-6-phosphate receptor OS=Mus musculus OX=10090 GN=M6pr PE=1 SV=1	0	50.397	26	5	21	5	1	278	31.2	5.39	69.78	5	0	1.552	0.956	0.818	0.908	0.801	0.964	0.917	0.836	102.8	159.6	98.3	84.1	93.3	82.4	99.1	94.3	86	High	High	High	High	High	High	High	High	High
FALSE	High	Master Protein	P42567	Epidermal growth factor receptor substrate 15 OS=Mus musculus OX=10090 GN=Eps15 PE=1 SV=1	0	50.359	18	9	13	9	1	897	98.4	4.6	40.26	9	0	0.01	0.802	0.686	0.797	0.739	0.699	0.654	0.696	148.2		118.8	101.6	118.2	109.5	103.6	96.9	103.2	High	Not Found	High	High	High	High	High	High	High
FALSE	High	Master Protein	Q5HZI2	C2 calcium-dependent domain-containing protein 4C OS=Mus musculus OX=10090 GN=C2cd4cC2CD4 family PE=1 SV=1	0	50.259	26	7	17	7	1	419	44.6	9.73	55.95	7	0	0.01	0.851	0.806	0.868	0.858	0.899	0.842	0.862	128.8		109.7	103.8	111.8	110.6	115.8	108.4	111.1	High	Not Found	High	High	High	High	High	High	High
FALSE	High	Master Protein	Q8C419	Probable G-protein coupled receptor 158 OS=Mus musculus OX=10090 GN=Gpr158 PE=1 SV=2	0	50.057	12	10	13	10	1	1200	134.3	8.09	34.83	10	0	0.01	0.81	0.826	0.941	0.969	0.921	0.908	0.949	122.9		99.5	101.5	115.6	119.1	113.2	111.6	116.7	High	Not Found	High	High	High	High	High	High	High
FALSE	High	Master Protein	P17742	Peptidyl-prolyl cis-trans isomerase A OS=Mus musculus OX=10090 GN=Ppia PE=1 SV=2	0	50.044	55	12	37	11	1	164	18	7.9	84.62	12	0	0.536	1.259	1.242	1.274	1.327	1.241	1.367	1.336	85.1	45.6	107.1	105.6	108.3	112.9	105.5	116.3	113.6	High	High	High	High	High	High	High	High	High
FALSE	High	Master Protein	O88597	Beclin-1 OS=Mus musculus OX=10090 GN=Becn1 PE=1 SV=3	0	50.021	22	8	13	8	1	448	51.6	4.93	39.91	8	0	0.983	1.03	1.008	1.089	1.091	0.99	1.081	1.029	96.8	95.1	99.6	97.5	105.4	105.6	95.8	104.6	99.6	High	High	High	High	High	High	High	High	High
FALSE	High	Master Protein	Q8BLF1	Neutral cholesterol ester hydrolase 1 OS=Mus musculus OX=10090 GN=Nceh1 PE=1 SV=1	0	49.929	19	5	11	5	1	408	45.7	7.05	45.95	5	0	0.01	0.961	0.702	1.117	0.942	0.93	0.934	0.802	121.8		117.1	85.6	136.1	114.7	113.3	113.7	97.7	High	High	High	High	High	High	High	High	High
FALSE	High	Master Protein	Q07076	Annexin A7 OS=Mus musculus OX=10090 GN=Anxa7 PE=1 SV=2	0	49.899	19	9	15	9	1	463	49.9	6.18	49.67	9	0	0.478	0.856	0.765	0.855	0.826	0.869	0.849	0.798	123.4	58.9	105.6	94.4	105.5	101.9	107.1	104.7	98.4	High	High	High	High	High	High	High	High	High
FALSE	High	Master Protein	P35283	Ras-related protein Rab-12 OS=Mus musculus OX=10090 GN=Rab12 PE=1 SV=3	0	49.765	39	9	66	8	1	243	27.3	8.41	191.91	9	0	0.01	1.204	1.004	1.295	0.983	1.142	1.165	1.03	102		122.8	102.4	132.1	100.2	116.5	118.9	105.1	High	High	High	High	High	High	High	High	High
FALSE	High	Master Protein	Q9D394	Protein RUFY3 OS=Mus musculus OX=10090 GN=Rufy3 PE=1 SV=1	0	49.759	27	11	20	11	1	469	53	5.49	57.25	11	0	0.262	1.01	0.944	1.045	0.979	0.987	0.946	1.034	109.7	28.8	110.7	103.5	114.6	107.4	108.3	103.8	113.4	High	High	High	High	High	High	High	High	High
FALSE	High	Master Protein	Q8CGF6	WD repeat-containing protein 47 OS=Mus musculus OX=10090 GN=Wdr47 PE=1 SV=2	0	49.573	12	8	11	8	1	920	102.2	5.97	37.16	8	0	4.493	0.854	1.317	0.869	1.24	0.89	0.815	1.276	70.6	317.1	60.2	92.9	61.3	87.5	62.8	57.5	90	High	High	High	High	High	High	High	High	High
FALSE	High	Master Protein	P06330	Ig heavy chain V region AC38 205.12 OS=Mus musculus OX=10090 PE=1 SV=1	0	49.516	44	5	93	2	1	118	12.9	7.11	315.36	5	2	4.879	0.579	4.481	0.481	4.422	0.61	0.568	4.115	42.6	207.8	24.7	190.8	20.5	188.3	26	24.2	175.2	High	High	High	High	High	High	High	High	High
FALSE	High	Master Protein	Q61301	Catenin alpha-2 OS=Mus musculus OX=10090 GN=Ctnna2 PE=1 SV=3	0	49.468	17	11	14	11	1	953	105.2	5.71	35.69	11	0																		High	High	High	High	High	High	High	High	High
FALSE	High	Master Protein	Q9D0M5	Dynein light chain 2, cytoplasmic OS=Mus musculus OX=10090 GN=Dynll2 PE=1 SV=1	0	49.322	45	3	33	2	1	89	10.3	7.37	108.72	3	0	0.01	1.085	1.107	1.033	0.978	1.037	1.02	0.961	109.5		118.8	121.2	113.1	107	113.5	111.7	105.2	High	High	High	High	High	High	High	High	High
FALSE	High	Master Protein	P23819	Glutamate receptor 2 OS=Mus musculus OX=10090 GN=Gria2 PE=1 SV=3	0	49.263	8	6	13	3	1	883	98.6	7.39	46.83	6	2	0.01	0.928	0.832	0.848	0.83	0.886	0.819	0.774	130.1		120.7	108.2	110.4	107.9	115.3	106.6	100.7	High	Not Found	High	High	High	High	High	High	High
FALSE	High	Master Protein	Q64518	Sarcoplasmic/endoplasmic reticulum calcium ATPase 3 OS=Mus musculus OX=10090 GN=Atp2a3 PE=1 SV=3	0	49.194	12	11	29	3	1	1038	113.6	5.85	103.07	11	0																		High	Not Found	High	High	High	High	High	High	High
FALSE	High	Master Protein	A2AQ25	Sickle tail protein OS=Mus musculus OX=10090 GN=Skt PE=1 SV=1	0	49.084	7	12	22	12	1	1946	212.9	7.77	62.49	12	0	3.611	0.893	0.944	0.95	1.004	0.918	0.902	0.929	80.7	291.4	72.1	76.2	76.7	81	74.1	72.8	75	High	High	High	High	High	High	High	High	High
FALSE	High	Master Protein	Q921I1	Serotransferrin OS=Mus musculus OX=10090 GN=Tf PE=1 SV=1	0	48.864	20	11	18	11	1	697	76.7	7.18	47.2	11	0	2.248	1.061	1.096	1	1.164	1.047	0.979	1.184	83.5	187.7	88.6	91.5	83.5	97.2	87.4	81.7	98.9	High	High	High	High	High	High	High	High	High
FALSE	High	Master Protein	Q61990	Poly(rC)-binding protein 2 OS=Mus musculus OX=10090 GN=Pcbp2 PE=1 SV=1	0	48.801	28	8	21	3	1	362	38.2	6.79	63.01	8	1	22.402	0.923	1.104	0.92	1.13	0.956	0.824	1.089	29.7	664.4	27.4	32.7	27.3	33.5	28.3	24.4	32.3	High	High	High	High	High	High	High	High	High
FALSE	High	Master Protein	Q6A065	Centrosomal protein of 170 kDa OS=Mus musculus OX=10090 GN=Cep170 PE=1 SV=2	0	48.653	8	10	16	10	1	1588	174.9	7.17	38.65	10	0	0.01	0.712	0.849	0.767	0.964	0.824	0.714	0.896	133.8		95.3	113.5	102.6	129	110.3	95.5	119.9	High	High	High	High	High	High	High	High	High
FALSE	High	Master Protein	Q3UTZ3	Uncharacterized protein C7orf43 homolog OS=Mus musculus OX=10090 PE=1 SV=1	0	48.509	21	9	17	9	1	580	62.7	8.68	50.26	9	0	0.01	1.04	0.798	1.055	0.773	0.963	1.017	0.761	121.5		126.4	96.9	128.2	93.9	117	123.6	92.4	High	High	High	High	High	High	High	High	High
FALSE	High	Master Protein	P05201	Aspartate aminotransferase, cytoplasmic OS=Mus musculus OX=10090 GN=Got1 PE=1 SV=3	0	48.488	30	12	31	12	1	413	46.2	7.14	79.53	12	0	0.01	1.236	0.919	0.968	0.907	1.045	0.985	0.911	112.9		139.5	103.7	109.3	102.4	118	111.2	102.8	High	High	High	High	High	High	High	High	High
FALSE	High	Master Protein	Q8BHN3	Neutral alpha-glucosidase AB OS=Mus musculus OX=10090 GN=Ganab PE=1 SV=1	0	48.453	13	9	21	9	1	944	106.8	6.06	65.25	9	0	0.01	0.854	0.828	0.895	0.872	0.9	0.89	0.908	125.9		107.5	104.3	112.6	109.8	113.3	112.1	114.4	High	High	High	High	High	High	High	High	High
FALSE	High	Master Protein	Q8C996	Transmembrane protein 163 OS=Mus musculus OX=10090 GN=Tmem163 PE=1 SV=1	0	48.338	20	5	22	5	1	288	31.2	7.93	86.72	5	0	1.567	1.274	1.066	1.322	1.154	1.173	1.303	1.119	82	128.5	104.4	87.4	108.4	94.6	96.2	106.8	91.7	High	High	High	High	High	High	High	High	High
FALSE	High	Master Protein	P49615	Cyclin-dependent-like kinase 5 OS=Mus musculus OX=10090 GN=Cdk5 PE=1 SV=1	0	48.211	32	8	17	7	1	292	33.3	7.66	59.43	8	1	0.576	1.056	1.104	1.032	1.006	1.062	1.019	1.018	101.4	58.4	107.1	111.9	104.7	102	107.7	103.4	103.3	High	High	High	High	High	High	High	High	High
FALSE	High	Master Protein	Q9EP69	Phosphatidylinositide phosphatase SAC1 OS=Mus musculus OX=10090 GN=Sacm1l PE=1 SV=1	0	48.095	16	9	17	9	1	587	66.9	7.3	58.44	9	0	5.637	0.856	0.814	0.908	0.907	0.933	0.879	0.965	69.8	393.3	59.7	56.8	63.3	63.3	65.1	61.3	67.3	High	High	High	High	High	High	High	High	High
FALSE	High	Master Protein	Q9WTR5	Cadherin-13 OS=Mus musculus OX=10090 GN=Cdh13 PE=1 SV=2	0	48.087	12	7	12	7	1	714	78.1	5.12	41.42	7	0	0.73	1.024	0.873	1.037	0.978	1.072	1.099	0.995	102.2	74.6	104.6	89.2	106	99.9	109.6	112.3	101.7	High	High	High	High	High	High	High	High	High
FALSE	High	Master Protein	P62751	60S ribosomal protein L23a OS=Mus musculus OX=10090 GN=Rpl23a PE=1 SV=1	0	48.056	35	7	34	7	1	156	17.7	10.45	123.11	7	0	0.151	0.216	0.22	0.208	0.266	0.226	0.206	0.217	332.2	50.1	71.9	72.9	69.2	88.2	75	68.3	72.1	High	High	High	High	High	High	High	High	High
FALSE	High	Master Protein	Q8BMA6	Signal recognition particle subunit SRP68 OS=Mus musculus OX=10090 GN=Srp68 PE=1 SV=2	0	48.051	19	11	27	11	1	625	70.5	8.57	64.34	11	0	0.01	0.987	1.257	1.078	1.21	1.099	1.03	1.207	101.5		100.2	127.6	109.4	122.8	111.5	104.5	122.5	High	Not Found	High	High	High	High	High	High	High
FALSE	High	Master Protein	Q61411	GTPase HRas OS=Mus musculus OX=10090 GN=Hras PE=1 SV=2	0	47.984	41	6	17	4	1	189	21.3	5.31	58.66	6	2	6.044	0.863	0.854	0.853	0.894	0.959	0.855	0.87	68.2	412.4	58.9	58.3	58.2	61	65.4	58.3	59.4	High	Not Found	High	High	High	High	High	High	High
FALSE	High	Master Protein	Q60634	Flotillin-2 OS=Mus musculus OX=10090 GN=Flot2 PE=1 SV=2	0	47.87	20	8	15	8	1	428	47	5.2	46.83	8	0	0.01	1.28	1.094	1.287	1.203	1.258	1.288	1.182	93.8		120.1	102.6	120.8	112.9	118	120.8	110.9	High	Not Found	High	High	High	High	High	High	High
FALSE	High	Master Protein	Q99L43	Phosphatidate cytidylyltransferase 2 OS=Mus musculus OX=10090 GN=Cds2 PE=1 SV=1	0	47.584	14	7	15	7	1	444	51.3	7.05	52.85	7	0	0.01	1.275	0.931	1.268	0.911	0.929	1.276	0.903	106		135.1	98.7	134.3	96.5	98.4	135.3	95.7	High	High	High	High	High	High	High	High	High
FALSE	High	Master Protein	O70228	Probable phospholipid-transporting ATPase IIA OS=Mus musculus OX=10090 GN=Atp9a PE=1 SV=3	0	47.562	13	7	11	4	1	1047	118.5	7.69	33.8	7	3	0.01	1.082	1.007	1.07	0.995	1.044	0.997	1.009	109.7		118.7	110.5	117.4	109.2	114.5	109.4	110.7	High	Not Found	High	High	High	High	High	High	High
FALSE	High	Master Protein	Q9ER72	Cysteine--tRNA ligase, cytoplasmic OS=Mus musculus OX=10090 GN=Cars PE=1 SV=2	0	47.507	11	7	12	7	1	831	94.8	6.76	40.6	7	0	0.01	0.949	1.005	0.981	0.941	0.963	0.871	0.917	118		112	118.5	115.8	111.1	113.6	102.8	108.2	High	Not Found	High	High	High	High	High	High	High
FALSE	High	Master Protein	Q9WVJ2	26S proteasome non-ATPase regulatory subunit 13 OS=Mus musculus OX=10090 GN=Psmd13 PE=1 SV=1	0	47.329	32	10	22	10	1	376	42.8	5.71	63.24	10	0	0.01	1.34	1.35	1.372	1.418	1.162	1.213	1.294	88.7		118.8	119.7	121.7	125.7	103.1	107.5	114.7	High	High	High	High	High	High	High	High	High
FALSE	High	Master Protein	Q8VEH3	ADP-ribosylation factor-like protein 8A OS=Mus musculus OX=10090 GN=Arl8a PE=1 SV=1	0	47.127	31	6	38	3	1	186	21.4	7.77	122.34	6	3	0.01	1.403	1.162	1.442	1.059	1.292	1.425	1.135	90.7		127.3	105.5	130.9	96.1	117.2	129.3	103	High	High	High	High	High	High	High	High	High
FALSE	High	Master Protein	P04370	Myelin basic protein OS=Mus musculus OX=10090 GN=Mbp PE=1 SV=2	0	47.114	34	8	84	8	1	250	27.2	9.58	207.74	8	0	0.618	0.774	0.958	0.76	0.933	0.88	0.829	0.991	116.2	71.8	90	111.4	88.3	108.5	102.2	96.3	115.2	High	High	High	High	High	High	High	High	High
FALSE	High	Master Protein	P48036	Annexin A5 OS=Mus musculus OX=10090 GN=Anxa5 PE=1 SV=1	0	47.108	33	9	25	8	1	319	35.7	4.96	85.57	9	0	3.367	1.135	1.099	1.136	1.217	1.164	1.154	1.215	72.1	242.7	81.8	79.2	81.9	87.7	83.9	83.2	87.6	High	High	High	High	High	High	High	High	High
FALSE	High	Master Protein	Q8CI43	Myosin light chain 6B OS=Mus musculus OX=10090 GN=Myl6b PE=1 SV=1	0	47.097	30	7	82	5	1	207	22.7	5.53	226.19	7	0	0.01	1.205	1.219	1.313	1.261	1.14	1.215	1.253	93.7		112.9	114.2	123	118.1	106.8	113.9	117.4	High	Not Found	High	High	High	High	High	High	High
FALSE	High	Master Protein	Q6NVF0	Inositol polyphosphate 5-phosphatase OCRL-1 OS=Mus musculus OX=10090 GN=Ocrl PE=1 SV=1	0	47.044	17	12	20	12	1	900	104.2	6.27	44.84	12	0	1.815	0.963	0.786	0.941	0.817	1.01	0.954	0.802	99	179.7	95.4	77.8	93.2	80.9	100	94.5	79.4	High	High	High	High	High	High	High	High	High
FALSE	High	Master Protein	Q9JKC8	AP-3 complex subunit mu-1 OS=Mus musculus OX=10090 GN=Ap3m1 PE=1 SV=1	0	46.934	28	7	10	4	1	418	46.9	6.93	30.93	7	0	0.01	1.044	0.915	1.08	0.968	1.018	0.993	1.032	111.8		116.7	102.3	120.7	108.2	113.9	111	115.4	High	Not Found	High	High	High	High	High	High	High
FALSE	High	Master Protein	Q99LF4	tRNA-splicing ligase RtcB homolog OS=Mus musculus OX=10090 GN=Rtcb PE=1 SV=1	0	46.847	16	7	14	7	1	505	55.2	7.23	50.14	7	0	1.059	0.839	0.833	0.838	0.833	0.831	0.832	0.837	113.9	120.6	95.5	94.9	95.4	94.8	94.7	94.7	95.4	High	High	High	High	High	High	High	High	High
FALSE	High	Master Protein	Q91W86	Vacuolar protein sorting-associated protein 11 homolog OS=Mus musculus OX=10090 GN=Vps11 PE=1 SV=3	0	46.811	13	10	21	10	1	941	107.7	7.01	62.8	10	0	0.888	1.072	1.005	1.126	1.103	1.078	1.053	1.042	96.1	85.4	103	96.6	108.2	106	103.6	101.2	100.1	High	High	High	High	High	High	High	High	High
FALSE	High	Master Protein	Q8BGD5	Carnitine O-palmitoyltransferase 1, brain isoform OS=Mus musculus OX=10090 GN=Cpt1c PE=1 SV=1	0	46.805	11	5	8	5	1	798	90	7.49	33.62	5	0	3.859	0.748	0.671	0.82	0.768	0.805	0.781	0.773	88	339.7	65.9	59	72.2	67.6	70.8	68.7	68.1	High	High	High	High	High	High	High	High	High
FALSE	High	Master Protein	P84075	Neuron-specific calcium-binding protein hippocalcin OS=Mus musculus OX=10090 GN=Hpca PE=1 SV=2	0	46.662	48	10	24	1	1	193	22.4	4.97	67.32	10	7	0.464	1.193	1.035	1.09	1.11	1.163	1.112	1.149	96.6	44.8	115.2	99.9	105.3	107.2	112.4	107.5	111	High	Not Found	High	High	High	High	High	High	High
FALSE	High	Master Protein	P59281	Rho GTPase-activating protein 39 OS=Mus musculus OX=10090 GN=Arhgap39 PE=1 SV=2	0	46.606	12	8	13	8	1	1107	125.1	7.97	40.45	8	0	0.01	0.687	0.617	0.666	0.667	0.643	0.6	0.694	161.5		111	99.6	107.6	107.8	103.8	96.9	112	High	Not Found	High	High	High	High	High	High	High
FALSE	High	Master Protein	Q99JI6	Ras-related protein Rap-1b OS=Mus musculus OX=10090 GN=Rap1b PE=1 SV=2	0	46.572	43	8	19	2	1	184	20.8	5.78	59.51	8	0	15.606	1.11	1.06	1.144	1.111	1.101	1.14	1.18	36.8	574.4	40.9	39	42.1	40.9	40.5	42	43.4	High	High	High	High	High	High	High	High	High
FALSE	High	Master Protein	P80316	T-complex protein 1 subunit epsilon OS=Mus musculus OX=10090 GN=Cct5 PE=1 SV=1	0	46.543	24	13	18	13	1	541	59.6	6.02	38.41	13	0	0.01	0.775	0.875	0.883	0.975	0.968	0.77	0.95	125.1		96.9	109.4	110.5	122	121.1	96.3	118.8	High	Not Found	High	High	High	High	High	High	High
FALSE	High	Master Protein	Q9Z2H5	Band 4.1-like protein 1 OS=Mus musculus OX=10090 GN=Epb41l1 PE=1 SV=2	0	46.41	12	10	21	9	1	879	98.3	5.62	58.94	10	1	0.01	1.021	0.922	1.119	1.014	1.062	1.075	1.322	105.5		107.6	97.2	118	106.9	112	113.4	139.4	High	High	High	High	High	High	High	High	High
FALSE	High	Master Protein	P35279	Ras-related protein Rab-6A OS=Mus musculus OX=10090 GN=Rab6a PE=1 SV=4	0	46.271	35	8	68	2	1	208	23.6	5.54	195.72	8	0	0.01	1.012	1.03	1.077	1.138	1.084	1.041	1.077	106.4		107.7	109.6	114.6	121.1	115.4	110.7	114.6	High	Not Found	High	High	High	High	High	High	High
FALSE	High	Master Protein	P32883	GTPase KRas OS=Mus musculus OX=10090 GN=Kras PE=1 SV=1	0	46.211	30	4	14	2	1	189	21.6	6.77	54.73	4	0	0.01	1.04	0.854	1.026	0.828	0.943	1.024	0.908	118.1		122.8	100.8	121.2	97.8	111.3	120.9	107.2	High	High	High	High	High	High	High	High	High
FALSE	High	Master Protein	Q8VHH5	Arf-GAP with GTPase, ANK repeat and PH domain-containing protein 3 OS=Mus musculus OX=10090 GN=Agap3 PE=1 SV=1	0	46.179	11	9	18	4	1	910	97.9	7.75	58.21	9	0																		High	Not Found	High	High	High	High	High	High	High
FALSE	High	Master Protein	Q8C522	Endonuclease domain-containing 1 protein OS=Mus musculus OX=10090 GN=Endod1 PE=1 SV=2	0	46.165	17	6	12	6	1	501	55.2	6.16	44.65	6	0	0.01	0.888	0.744	0.938	0.823	0.892	0.855	0.79	129.9		115.4	96.6	121.8	106.9	115.8	111.1	102.6	High	Not Found	High	High	High	High	High	High	High
FALSE	High	Master Protein	Q99LR1	Monoacylglycerol lipase ABHD12 OS=Mus musculus OX=10090 GN=Abhd12 PE=1 SV=2	0	46.136	22	7	13	7	1	398	45.2	8.72	53.57	7	0	1.931	0.938	0.818	0.999	0.887	0.977	0.994	0.874	95.6	184.5	89.6	78.2	95.5	84.7	93.4	95	83.5	High	High	High	High	High	High	High	High	High
FALSE	High	Master Protein	P62830	60S ribosomal protein L23 OS=Mus musculus OX=10090 GN=Rpl23 PE=1 SV=1	0	46.071	50	6	27	6	1	140	14.9	10.51	82	6	0	7.091	0.414	0.403	0.417	0.461	0.457	0.412	0.427	81.2	575.9	33.6	32.7	33.8	37.4	37.1	33.5	34.7	High	High	High	High	High	High	High	High	High
FALSE	High	Master Protein	P55258	Ras-related protein Rab-8A OS=Mus musculus OX=10090 GN=Rab8a PE=1 SV=2	0	46.053	26	7	82	1	1	207	23.7	9.07	249.63	7	0																		High	High	High	High	High	High	High	High	High
FALSE	High	Master Protein	P12961	Neuroendocrine protein 7B2 OS=Mus musculus OX=10090 GN=Scg5 PE=1 SV=1	0	46	35	6	21	5	1	212	23.9	5.81	70.68	6	0	0.01	1.185	1.16	1.126	1.139	1.122	1.144	1.193	99.2		117.6	115.1	111.7	113.1	111.4	113.5	118.4	High	Not Found	High	High	High	High	High	High	High
FALSE	High	Master Protein	Q80XR2	Calcium-transporting ATPase type 2C member 1 OS=Mus musculus OX=10090 GN=Atp2c1 PE=1 SV=2	0	45.987	17	13	19	12	1	918	100.2	6.83	53.38	13	0	0.447	1.029	0.895	1.099	0.951	1.168	1.056	0.977	104.4	46.6	107.4	93.4	114.7	99.3	121.9	110.2	102	High	High	High	High	High	High	High	High	High
FALSE	High	Master Protein	Q3UPL0	Protein transport protein Sec31A OS=Mus musculus OX=10090 GN=Sec31a PE=1 SV=2	0	45.874	8	7	11	7	1	1230	133.5	6.76	40.32	7	0	2.478	1	1.534	1.081	1.587	1.025	1.004	1.675	72.7	180.1	72.7	111.5	78.5	115.3	74.5	73	121.8	High	High	High	High	High	High	High	High	High
FALSE	High	Master Protein	Q6NXK7	Inactive dipeptidyl peptidase 10 OS=Mus musculus OX=10090 GN=Dpp10 PE=1 SV=1	0	45.866	14	12	38	11	1	797	90.8	6.48	93.52	12	0	2.157	1.023	0.897	1.04	0.9	1.092	1.038	0.933	89.3	192.6	91.4	80.1	92.8	80.4	97.5	92.7	83.3	High	High	High	High	High	High	High	High	High
FALSE	High	Master Protein	Q80ZJ1	Ras-related protein Rap-2a OS=Mus musculus OX=10090 GN=Rap2a PE=1 SV=2	0	45.803	31	5	27	1	1	183	20.6	4.82	78.16	5	0																		High	Not Found	High	High	High	High	High	High	High
FALSE	High	Master Protein	O88844	Isocitrate dehydrogenase [NADP] cytoplasmic OS=Mus musculus OX=10090 GN=Idh1 PE=1 SV=2	0	45.778	25	11	23	11	1	414	46.6	7.17	65.14	11	0	2.567	1.168	1.353	1.137	1.218	1.138	1.014	1.154	76.6	196.6	89.5	103.6	87.1	93.3	87.2	77.7	88.4	High	High	High	High	High	High	High	High	High
FALSE	High	Master Protein	P18572	Basigin OS=Mus musculus OX=10090 GN=Bsg PE=1 SV=2	0	45.768	14	6	13	6	1	389	42.4	5.85	47.59	6	0	0.01	0.987	0.952	0.933	1.102	1.016	0.965	1.09	111.9		110.4	106.5	104.4	123.3	113.6	108	122	High	High	High	High	High	High	High	High	High
FALSE	High	Master Protein	P62141	Serine/threonine-protein phosphatase PP1-beta catalytic subunit OS=Mus musculus OX=10090 GN=Ppp1cb PE=1 SV=3	0	45.645	29	8	14	4	1	327	37.2	6.19	57.35	8	3	0.252	0.669	0.72	0.688	0.738	0.719	0.686	0.711	145.6	36.7	97.4	104.8	100.2	107.4	104.6	99.8	103.5	High	Not Found	High	High	High	High	High	High	High
FALSE	High	Master Protein	Q9WVK4	EH domain-containing protein 1 OS=Mus musculus OX=10090 GN=Ehd1 PE=1 SV=1	0	45.605	29	11	19	8	1	534	60.6	6.83	50.47	11	0	0.01	1.032	1.101	1.403	1.37	0.821	0.964	1.293	100.2		103.4	110.3	140.6	137.2	82.2	96.6	129.5	High	Not Found	High	High	High	High	High	High	High
FALSE	High	Master Protein	P97300	Neuroplastin OS=Mus musculus OX=10090 GN=Nptn PE=1 SV=3	0	45.595	19	7	27	7	1	397	44.3	7.74	93.35	7	0	0.786	1.283	1.179	1.34	1.319	1.24	1.331	1.388	82.8	65.1	106.3	97.7	111	109.2	102.7	110.2	114.9	High	High	High	High	High	High	High	High	High
FALSE	High	Master Protein	P26443	Glutamate dehydrogenase 1, mitochondrial OS=Mus musculus OX=10090 GN=Glud1 PE=1 SV=1	0	45.553	15	7	10	7	1	558	61.3	8	30.87	7	0	0.01	1.515	1.518	1.708	1.646	1.365	1.583	1.57	75.6		114.5	114.8	129.1	124.4	103.2	119.7	118.7	High	High	High	High	High	High	High	High	High
FALSE	High	Master Protein	Q8CIQ7	Dedicator of cytokinesis protein 3 OS=Mus musculus OX=10090 GN=Dock3 PE=1 SV=1	0	45.494	5	8	14	6	1	2027	232.8	6.99	34.86	8	0	0.01	0.966	0.795	0.954	0.898	0.854	0.787	0.826	127.1		122.8	101	121.2	114.2	108.6	100.1	105	High	Not Found	High	High	High	High	High	High	High
FALSE	High	Master Protein	Q9Z1Q2	Protein ABHD16A OS=Mus musculus OX=10090 GN=Abhd16a PE=1 SV=3	0	45.476	19	8	11	8	1	558	63	8.25	44.32	8	0	0.01	0.939	0.837	1.077	0.922	1.003	0.93	0.939	117.7		110.5	98.5	126.8	108.5	118	109.5	110.5	High	High	High	High	High	High	High	High	High
FALSE	High	Master Protein	Q6ZQ82	Rho GTPase-activating protein 26 OS=Mus musculus OX=10090 GN=Arhgap26 PE=1 SV=3	0	45.317	12	7	12	7	1	814	92	6.68	31.49	7	0	0.01	0.87	0.515	0.737	0.509	0.674	0.87	0.513	158.3		137.6	81.5	116.6	80.6	106.6	137.6	81.2	High	Not Found	High	High	High	High	High	High	High
FALSE	High	Master Protein	P47867	Secretogranin-3 OS=Mus musculus OX=10090 GN=Scg3 PE=1 SV=1	0	45.315	24	7	11	7	1	471	53.3	4.93	43.29	7	0	3.567	1.233	1.134	1.137	1.007	1.154	1.259	1.217	70.8	252.6	87.3	80.3	80.5	71.3	81.7	89.2	86.2	High	High	High	High	High	High	High	High	High
FALSE	High	Master Protein	O88712	C-terminal-binding protein 1 OS=Mus musculus OX=10090 GN=Ctbp1 PE=1 SV=2	0	45.213	17	7	16	7	1	441	47.7	6.77	52.54	7	0	0.01	1.359	1.799	1.346	1.707	1.447	1.41	1.721	76.3		103.8	137.3	102.7	130.3	110.5	107.7	131.4	High	High	High	High	High	High	High	High	High
FALSE	High	Master Protein	O70251	Elongation factor 1-beta OS=Mus musculus OX=10090 GN=Eef1b PE=1 SV=5	0	45.159	37	6	17	6	1	225	24.7	4.69	65.52	6	0	0.409	0.726	0.901	0.727	0.879	0.73	0.69	0.839	130.4	53.4	94.7	117.5	94.8	114.6	95.2	90	109.4	High	High	High	High	High	High	High	High	High
FALSE	High	Master Protein	Q91ZP9	N-terminal EF-hand calcium-binding protein 2 OS=Mus musculus OX=10090 GN=Necab2 PE=1 SV=1	0	45.12	29	8	18	8	1	389	43.4	5.3	64.41	8	0	0.01	0.982	1.007	1.043	1.084	1.031	0.99	1.076	109.6		107.6	110.4	114.3	118.8	113	108.5	117.9	High	High	High	High	High	High	High	High	High
FALSE	High	Master Protein	Q8K3E5	Jouberin OS=Mus musculus OX=10090 GN=Ahi1 PE=1 SV=2	0	45.076	12	11	12	11	1	1047	119.6	7.18	41.58	11	0	0.676	0.897	1.082	0.899	1.061	0.935	0.809	0.977	108	73	96.9	116.8	97.1	114.6	100.9	87.3	105.4	High	High	High	High	High	High	High	High	High
FALSE	High	Master Protein	O55106	Striatin OS=Mus musculus OX=10090 GN=Strn PE=1 SV=2	0	45.039	16	7	9	7	1	780	85.9	5.27	32.7	7	0	0.01	0.67	0.66	0.669	0.688	0.752	0.653	0.638	157		105.2	103.7	105	108.1	118.2	102.5	100.2	High	Not Found	High	High	High	High	High	High	High
FALSE	High	Master Protein	Q9QYB8	Beta-adducin OS=Mus musculus OX=10090 GN=Add2 PE=1 SV=4	0	45.03	16	7	21	6	1	725	80.6	6.21	58.18	7	0	0.01	0.732	1.062	0.705	0.916	0.681	0.624	0.851	137		100.2	145.4	96.6	125.5	93.3	85.5	116.5	High	High	High	High	High	High	High	High	High
FALSE	High	Master Protein	Q8BX17	Gem-associated protein 5 OS=Mus musculus OX=10090 GN=Gemin5 PE=1 SV=2	0	44.912	9	11	40	11	1	1502	166.5	6.71	57.04	11	0	0.145	0.669	0.684	0.64	0.599	0.898	0.605	0.803	149	21.6	99.6	101.9	95.3	89.2	133.7	90.2	119.6	High	High	High	High	High	High	High	High	High
FALSE	High	Master Protein	Q9QYJ0	DnaJ homolog subfamily A member 2 OS=Mus musculus OX=10090 GN=Dnaja2 PE=1 SV=1	0	44.79	31	9	21	9	1	412	45.7	6.48	64.78	9	0	0.363	1.026	1.306	1.1	1.433	1.127	1.04	1.4	91.9	33.4	94.3	120	101.1	131.7	103.6	95.5	128.6	High	High	High	High	High	High	High	High	High
FALSE	High	Master Protein	Q9QXS6	Drebrin OS=Mus musculus OX=10090 GN=Dbn1 PE=1 SV=4	0	44.711	17	7	10	7	1	706	77.2	4.49	37.7	7	0	0.01	0.641	0.578	0.68	0.677	0.654	0.553	0.622	166.5		106.8	96.3	113.2	112.7	108.8	92	103.6	High	Not Found	High	High	High	High	High	High	High
FALSE	High	Master Protein	P62743	AP-2 complex subunit sigma OS=Mus musculus OX=10090 GN=Ap2s1 PE=1 SV=1	0	44.684	34	5	51	5	1	142	17	6.18	137.92	5	0	1.752	1.033	0.815	0.995	0.713	0.93	0.962	0.717	100.9	176.8	104.3	82.3	100.4	71.9	93.9	97.1	72.4	High	High	High	High	High	High	High	High	High
FALSE	High	Master Protein	Q8BHC1	Ras-related protein Rab-39B OS=Mus musculus OX=10090 GN=Rab39b PE=1 SV=1	0	44.636	31	8	68	6	1	213	24.6	7.83	192.05	8	0	0.01	1.056	1.005	1.124	1.144	1.157	1.084	1.072	104.1		110	104.7	117	119.1	120.5	112.9	111.6	High	Not Found	High	High	High	High	High	High	High
FALSE	High	Master Protein	Q8K1X1	WD repeat-containing protein 11 OS=Mus musculus OX=10090 GN=Wdr11 PE=1 SV=1	0	44.486	6	5	10	5	1	1223	135.9	7.11	39.98	5	0	0.01	1.185	1.218	1.283	1.323	1.268	1.273	1.293	91.4		108.3	111.3	117.4	121	116	116.4	118.2	High	High	High	High	High	High	High	High	High
FALSE	High	Master Protein	P97797	Tyrosine-protein phosphatase non-receptor type substrate 1 OS=Mus musculus OX=10090 GN=Sirpa PE=1 SV=1	0	44.448	18	6	15	6	1	513	56.4	8.15	63.46	6	0	0.01	0.966	0.923	1.031	1.096	0.901	1.044	1.12	111.4		107.6	102.8	114.8	122.1	100.3	116.3	124.8	High	High	High	High	High	High	High	High	High
FALSE	High	Master Protein	P40142	Transketolase OS=Mus musculus OX=10090 GN=Tkt PE=1 SV=1	0	44.359	20	9	13	9	1	623	67.6	7.5	43.45	9	0	0.01	1.105	0.868	1.046	0.941	0.959	1.026	1.027	112.9		124.8	97.9	118.1	106.2	108.2	115.9	115.9	High	High	High	High	High	High	High	High	High
FALSE	High	Master Protein	P56480	ATP synthase subunit beta, mitochondrial OS=Mus musculus OX=10090 GN=Atp5f1b PE=1 SV=2	0	44.29	17	6	13	6	1	529	56.3	5.34	41.77	6	0	0.01	0.757	0.788	0.819	0.812	0.712	0.71	0.801	140.6		106.5	110.9	115.1	114.2	100.2	99.8	112.7	High	Not Found	High	High	High	High	High	High	High
FALSE	High	Master Protein	Q52KF3	Protein spire homolog 1 OS=Mus musculus OX=10090 GN=Spire1 PE=1 SV=1	0	44.271	24	8	11	8	1	598	68.4	9.01	29.64	8	0	3.026	0.931	0.956	0.949	1.037	0.926	0.952	1.012	83.4	252.5	77.7	79.7	79.2	86.5	77.2	79.4	84.4	High	High	High	High	High	High	High	High	High
FALSE	High	Master Protein	O70161	Phosphatidylinositol 4-phosphate 5-kinase type-1 gamma OS=Mus musculus OX=10090 GN=Pip5k1c PE=1 SV=2	0	44.259	17	10	15	8	1	661	72.4	5.59	36.46	10	1	0.513	1.261	1.04	1.409	1.152	1.344	1.275	1.181	88.4	45.4	111.6	92	124.7	101.9	118.9	112.8	104.4	High	High	High	High	High	High	High	High	High
FALSE	High	Master Protein	P18760	Cofilin-1 OS=Mus musculus OX=10090 GN=Cfl1 PE=1 SV=3	0	44.208	45	6	27	4	1	166	18.5	8.09	78.08	6	2	0.137	1.45	1.778	1.552	1.752	1.546	1.516	1.71	72.3	9.9	104.9	128.6	112.3	126.7	111.8	109.7	123.7	High	Not Found	High	High	High	High	High	High	High
FALSE	High	Master Protein	Q91ZR1	Ras-related protein Rab-4B OS=Mus musculus OX=10090 GN=Rab4b PE=1 SV=2	0	44.052	39	6	68	4	1	213	23.6	6.06	195.58	6	0	0.302	0.912	0.844	0.945	0.877	0.899	0.93	0.858	119	35.9	108.5	100.4	112.4	104.3	106.9	110.6	102.1	High	High	High	High	High	High	High	High	High
FALSE	High	Master Protein	O08585	Clathrin light chain A OS=Mus musculus OX=10090 GN=Clta PE=1 SV=2	0	43.911	43	12	52	12	1	235	25.6	4.58	151.19	12	0	0.145	1.144	1.155	1.055	1.051	1.098	1.148	1.208	100	14.5	114.4	115.4	105.5	105.1	109.7	114.7	120.8	High	High	High	High	High	High	High	High	High
FALSE	High	Master Protein	Q6A0A9	Constitutive coactivator of PPAR-gamma-like protein 1 OS=Mus musculus OX=10090 GN=FAM120A PE=1 SV=2	0	43.905	9	8	11	7	1	1112	121.6	8.92	40.56	8	0	0.01	0.517	0.487	0.544	0.539	0.548	0.523	0.519	192.5		99.6	93.7	104.7	103.7	105.5	100.6	99.8	High	Not Found	High	High	High	High	High	High	High
FALSE	High	Master Protein	P97384	Annexin A11 OS=Mus musculus OX=10090 GN=Anxa11 PE=1 SV=2	0	43.873	12	5	10	5	1	503	54	7.66	35.95	5	0	0.01	1.054	1.025	1.119	1.065	1.107	1.083	1.11	105.1		110.8	107.7	117.6	112	116.4	113.8	116.6	High	Not Found	High	High	High	High	High	High	High
FALSE	High	Master Protein	Q3UH60	Disco-interacting protein 2 homolog B OS=Mus musculus OX=10090 GN=Dip2b PE=1 SV=1	0	43.817	6	8	15	8	1	1574	171	8.09	44.42	8	0	6.722	1.107	1.039	1.058	1.049	1.053	1.092	1.048	59.3	398.9	65.7	61.7	62.8	62.2	62.5	64.8	62.2	High	High	High	High	High	High	High	High	High
FALSE	High	Master Protein	Q8K2L8	Trafficking protein particle complex subunit 12 OS=Mus musculus OX=10090 GN=Trappc12 PE=1 SV=2	0	43.681	14	8	16	8	1	797	87.6	4.81	51.42	8	0	0.01	1.223	1.015	1.167	0.964	1.035	1.111	0.932	106.5		130.3	108.1	124.4	102.7	110.3	118.3	99.3	High	Not Found	High	High	High	High	High	High	High
FALSE	High	Master Protein	Q60931	Voltage-dependent anion-selective channel protein 3 OS=Mus musculus OX=10090 GN=Vdac3 PE=1 SV=1	0	43.602	30	8	16	6	1	283	30.7	8.79	46.42	8	0	0.01	1.136	0.94	1.144	0.923	1.108	1.141	0.949	107.9		122.5	101.4	123.4	99.6	119.5	123.2	102.4	High	High	High	High	High	High	High	High	High
FALSE	High	Master Protein	O88307	Sortilin-related receptor OS=Mus musculus OX=10090 GN=Sorl1 PE=1 SV=3	0	43.536	6	9	12	9	1	2215	246.9	5.54	33.33	9	0	4.895	0.769	0.667	0.802	0.743	0.88	0.865	0.715	79.4	388.6	61.1	53	63.7	59	69.9	68.7	56.8	High	High	High	High	High	High	High	High	High
FALSE	High	Master Protein	Q8R574	Phosphoribosyl pyrophosphate synthase-associated protein 2 OS=Mus musculus OX=10090 GN=Prpsap2 PE=1 SV=1	0	43.426	23	7	15	5	1	369	40.9	7.17	35.51	7	1	0.01	1.242	1.447	1.367	1.657	1.348	1.443	1.612	81		100.6	117.1	110.7	134.1	109.2	116.8	130.5	High	Not Found	High	High	High	High	High	High	High
FALSE	High	Master Protein	Q3UJB9	Enhancer of mRNA-decapping protein 4 OS=Mus musculus OX=10090 GN=Edc4 PE=1 SV=2	0	43.422	9	9	12	9	1	1406	152.4	5.78	37.55	9	0	2.882	0.801	0.816	0.823	0.881	0.875	0.773	0.79	93.4	269.1	74.8	76.1	76.8	82.2	81.7	72.2	73.8	High	High	High	High	High	High	High	High	High
FALSE	High	Master Protein	P56371	Ras-related protein Rab-4A OS=Mus musculus OX=10090 GN=Rab4a PE=1 SV=2	0	43.409	52	8	59	6	1	218	24.4	6.07	167.31	8	0	0.01	0.83	0.805	0.825	0.783	0.871	0.805	0.815	133.7		110.9	107.6	110.3	104.7	116.4	107.5	109	High	High	High	High	High	High	High	High	High
FALSE	High	Master Protein	Q9CQE8	RNA transcription, translation and transport factor protein OS=Mus musculus OX=10090 GN=RTRAF PE=1 SV=1	0	43.3	27	6	17	6	1	244	28.1	6.89	56.64	6	0	0.01	0.898	0.914	0.877	0.719	0.881	0.852	0.781	130		116.8	118.8	114	93.5	114.6	110.8	101.5	High	High	High	High	High	High	High	High	High
FALSE	High	Master Protein	P47911	60S ribosomal protein L6 OS=Mus musculus OX=10090 GN=Rpl6 PE=1 SV=3	0	43.288	28	10	36	10	1	296	33.5	10.7	105.98	10	0	0.429	0.739	0.683	0.765	0.748	0.689	0.775	0.684	138.2	59.3	102.1	94.4	105.7	103.4	95.2	107.2	94.5	High	High	High	High	High	High	High	High	High
FALSE	High	Master Protein	P01660	Ig kappa chain V-III region PC 3741/TEPC 111 OS=Mus musculus OX=10090 PE=1 SV=1	0	43.177	63	4	47	2	1	111	12.1	5.38	209.35	4	0	1.657	0.725	2.747	0.542	3.017	0.803	0.629	2.843	64.5	106.8	46.7	177.1	34.9	194.5	51.8	40.6	183.2	High	High	High	High	High	High	High	High	High
FALSE	High	Master Protein	Q3UVL4	Vacuolar protein sorting-associated protein 51 homolog OS=Mus musculus OX=10090 GN=Vps51 PE=1 SV=2	0	43.038	16	9	10	9	1	782	86.1	6.24	29.73	9	0	3.645	0.712	0.845	0.833	1.057	0.826	0.766	1.016	84.1	306.6	59.9	71.1	70	88.9	69.5	64.4	85.4	High	High	High	High	High	High	High	High	High
FALSE	High	Master Protein	P01665	Ig kappa chain V-III region PC 7043 OS=Mus musculus OX=10090 PE=1 SV=1	0	42.992	44	3	38	2	1	111	12	4.61	191.71	3	0	2.314	0.708	3.704	0.728	3.799	0.771	0.666	3.745	51.6	119.4	36.5	191.2	37.6	196.1	39.8	34.4	193.3	High	High	High	High	High	High	High	High	High
FALSE	High	Master Protein	Q6R0H7	Guanine nucleotide-binding protein G(s) subunit alpha isoforms XLas OS=Mus musculus OX=10090 GN=Gnas PE=1 SV=1	0	42.957	7	6	26	5	1	1133	121.4	4.81	86.11	6	0	0.01	1.189	1.252	1.221	1.328	1.194	1.235	1.415	91.5		108.8	114.6	111.8	121.6	109.3	113.1	129.5	High	Not Found	High	High	High	High	High	High	High
FALSE	High	Master Protein	Q8CGU1	Calcium-binding and coiled-coil domain-containing protein 1 OS=Mus musculus OX=10090 GN=Calcoco1 PE=1 SV=2	0	42.954	12	7	10	7	1	691	77.2	4.82	26.65	7	0	6.956	0.778	0.737	0.929	0.884	0.857	0.737	0.838	65.6	456.4	51.1	48.4	61	58	56.3	48.4	55	High	High	High	High	High	High	High	High	High
FALSE	High	Master Protein	Q8R151	NFX1-type zinc finger-containing protein 1 OS=Mus musculus OX=10090 GN=Znfx1 PE=1 SV=3	0	42.686	6	7	9	7	1	1909	218.7	7.47	30.72	7	0	0.01	1.007	0.985	1.087	1.088	1.119	1.035	1.125	106.6		107.3	105	115.9	115.9	119.2	110.3	119.9	High	High	High	High	High	High	High	High	High
FALSE	High	Master Protein	Q9DBR7	Protein phosphatase 1 regulatory subunit 12A OS=Mus musculus OX=10090 GN=Ppp1r12a PE=1 SV=2	0	42.625	12	9	13	8	1	1029	114.9	5.49	41.41	9	1	1.049	0.838	0.949	0.91	0.956	0.825	0.746	0.91	110	115.3	92.1	104.4	100.1	105.1	90.8	82.1	100.1	High	Not Found	High	High	High	High	High	High	High
FALSE	High	Master Protein	Q9QUI0	Transforming protein RhoA OS=Mus musculus OX=10090 GN=Rhoa PE=1 SV=1	0	42.621	36	5	24	4	1	193	21.8	6.1	84.26	5	1	0.01	1.075	0.971	1.072	1.075	1.028	1.054	0.987	108.9		117.1	105.8	116.8	117.1	112	114.8	107.5	High	Not Found	High	High	High	High	High	High	High
FALSE	High	Master Protein	Q9WUM5	Succinate--CoA ligase [ADP/GDP-forming] subunit alpha, mitochondrial OS=Mus musculus OX=10090 GN=Suclg1 PE=1 SV=4	0	42.421	22	6	15	6	1	346	36.1	9.39	57.62	6	0	0.01	1.364	1.704	1.663	1.857	1.485	1.46	1.756	73.2		99.9	124.8	121.8	136	108.7	106.9	128.6	High	Not Found	High	High	High	High	High	High	High
FALSE	High	Master Protein	Q91YQ5	Dolichyl-diphosphooligosaccharide--protein glycosyltransferase subunit 1 OS=Mus musculus OX=10090 GN=Rpn1 PE=1 SV=1	0	42.34	14	8	18	8	1	608	68.5	6.46	46.8	8	0	0.01	0.869	0.8	0.887	0.809	0.851	0.841	0.802	131.2		114	105	116.4	106.1	111.7	110.4	105.2	High	High	High	High	High	High	High	High	High
FALSE	High	Master Protein	Q8R1A4	Dedicator of cytokinesis protein 7 OS=Mus musculus OX=10090 GN=Dock7 PE=1 SV=3	0	42.324	6	11	13	11	1	2130	241.3	6.71	31.22	11	0	0.01	0.786	0.716	0.835	0.761	0.819	0.759	0.722	140.7		110.5	100.7	117.5	107.1	115.2	106.7	101.5	High	High	High	High	High	High	High	High	High
FALSE	High	Master Protein	Q9ERI6	Retinol dehydrogenase 14 OS=Mus musculus OX=10090 GN=Rdh14 PE=1 SV=1	0	42.314	25	7	12	7	1	334	36.3	8.18	42.08	7	0	6.138	1.119	1.19	1.127	1.342	0.949	1.062	1.317	59	362.4	66.1	70.3	66.5	79.2	56	62.7	77.8	High	High	High	High	High	High	High	High	High
FALSE	High	Master Protein	P70336	Rho-associated protein kinase 2 OS=Mus musculus OX=10090 GN=Rock2 PE=1 SV=1	0	42.275	8	7	9	7	1	1388	160.5	5.99	35.76	7	0	2.329	0.974	0.916	1.034	0.951	1.009	0.965	0.929	89	207.4	86.8	81.6	92	84.6	89.9	85.9	82.7	High	High	High	High	High	High	High	High	High
FALSE	High	Master Protein	O35963	Ras-related protein Rab-33B OS=Mus musculus OX=10090 GN=Rab33b PE=1 SV=1	0	42.255	21	5	62	3	1	229	25.8	7.69	181.25	5	0	0.01	1.102	0.904	1.125	0.962	1.024	1.08	0.927	110.8		122.1	100.1	124.7	106.6	113.4	119.6	102.7	High	High	High	High	High	High	High	High	High
FALSE	High	Master Protein	Q9EQH3	Vacuolar protein sorting-associated protein 35 OS=Mus musculus OX=10090 GN=Vps35 PE=1 SV=1	0	42.243	13	8	27	8	1	796	91.7	5.44	67.87	8	0	0.01	1.547	1.566	1.563	1.923	1.524	1.543	1.648	73.1		113	114.5	114.2	140.6	111.4	112.8	120.4	High	Not Found	High	High	High	High	High	High	High
FALSE	High	Master Protein	A2CG49	Kalirin OS=Mus musculus OX=10090 GN=Kalrn PE=1 SV=1	0	42.164	5	9	12	5	1	2964	336.8	6.07	37.35	9	0	0.01	0.907	0.827	0.93	0.808	0.971	0.879	0.794	126.5		114.7	104.6	117.6	102.2	122.8	111.2	100.5	High	High	High	High	High	High	High	High	High
FALSE	High	Master Protein	Q9D7N9	Adipocyte plasma membrane-associated protein OS=Mus musculus OX=10090 GN=Apmap PE=1 SV=1	0	42.132	15	7	9	7	1	415	46.4	6.32	32.44	7	0	0.01	0.866	0.705	0.773	0.705	0.766	0.754	0.684	143.9		124.6	101.4	111.3	101.4	110.3	108.6	98.5	High	High	High	High	High	High	High	High	High
FALSE	High	Master Protein	Q9DBE8	Alpha-1,3/1,6-mannosyltransferase ALG2 OS=Mus musculus OX=10090 GN=Alg2 PE=1 SV=2	0	42.124	15	6	15	6	1	415	47.4	7.97	46.21	6	0	1.972	0.81	0.704	0.892	0.771	0.823	0.804	0.685	106.4	209.8	86.2	74.8	94.9	82	87.5	85.5	72.9	High	High	High	High	High	High	High	High	High
FALSE	High	Master Protein	Q8BFR5	Elongation factor Tu, mitochondrial OS=Mus musculus OX=10090 GN=Tufm PE=1 SV=1	0	41.963	16	7	21	7	1	452	49.5	7.56	61.08	7	0	0.678	0.706	0.698	0.737	0.732	0.837	0.685	0.676	133.3	90.5	94.1	93	98.3	97.6	111.6	91.4	90.1	High	High	High	High	High	High	High	High	High
FALSE	High	Master Protein	Q8CE50	Sorting nexin-30 OS=Mus musculus OX=10090 GN=Snx30 PE=1 SV=1	0	41.962	17	9	23	9	1	437	49.5	5.35	49.57	9	0	0.01	1.374	1.063	1.297	1.164	1.18	1.231	1.145	95.2		130.8	101.2	123.4	110.8	112.3	117.2	109	High	Not Found	High	High	High	High	High	High	High
FALSE	High	Master Protein	Q99PT1	Rho GDP-dissociation inhibitor 1 OS=Mus musculus OX=10090 GN=Arhgdia PE=1 SV=3	0	41.944	24	4	13	4	1	204	23.4	5.2	42.12	4	0	0.01	0.834	0.891	0.931	1.022	0.877	0.896	1.007	120.7		100.7	107.5	112.3	123.3	105.9	108.2	121.5	High	Not Found	High	High	High	High	High	High	High
FALSE	High	Master Protein	Q9WV60	Glycogen synthase kinase-3 beta OS=Mus musculus OX=10090 GN=Gsk3b PE=1 SV=2	0	41.924	19	6	23	4	1	420	46.7	8.78	71.52	6	1	1.754	1.22	1.145	1.221	1.088	1.181	1.231	1.098	82.3	144.3	100.4	94.2	100.5	89.5	97.2	101.3	90.3	High	High	High	High	High	High	High	High	High
FALSE	High	Master Protein	Q9R0N8	Synaptotagmin-6 OS=Mus musculus OX=10090 GN=Syt6 PE=1 SV=2	0	41.767	15	5	7	5	1	511	57.2	8.19	28.19	5	0	0.01	1.212	0.888	1.452	1.075	1.315	1.327	1.059	96.5		116.9	85.7	140.1	103.7	126.9	128	102.2	High	Not Found	High	High	High	High	High	High	High
FALSE	High	Master Protein	O35678	Monoglyceride lipase OS=Mus musculus OX=10090 GN=Mgll PE=1 SV=1	0	41.615	22	7	24	7	1	303	33.4	7.15	50.93	7	0	0.01	1.136	0.98	1.145	1.021	1.075	1.07	1.033	106.4		120.9	104.2	121.8	108.6	114.4	113.8	109.9	High	High	High	High	High	High	High	High	High
FALSE	High	Master Protein	Q99L45	Eukaryotic translation initiation factor 2 subunit 2 OS=Mus musculus OX=10090 GN=Eif2s2 PE=1 SV=1	0	41.549	28	8	26	8	1	331	38.1	5.8	60.87	8	0	1.374	1.04	0.963	0.998	0.946	1.325	0.994	0.941	93.9	129	97.7	90.5	93.7	88.9	124.4	93.4	88.4	High	High	High	High	High	High	High	High	High
FALSE	High	Master Protein	Q9EPU0	Regulator of nonsense transcripts 1 OS=Mus musculus OX=10090 GN=Upf1 PE=1 SV=2	0	41.532	12	10	15	10	1	1124	123.9	6.61	46	10	0	0.01	1.04	1.089	1.325	1.18	1.012	0.906	1.168	103.2		107.3	112.4	136.8	121.8	104.5	93.5	120.5	High	High	High	High	High	High	High	High	High
FALSE	High	Master Protein	Q5U3K5	Rab-like protein 6 OS=Mus musculus OX=10090 GN=Rabl6 PE=1 SV=2	0	41.433	12	5	14	5	1	725	79.8	5.53	51.03	5	0	0.01	0.581	0.486	0.608	0.537	0.696	0.481	0.496	184.3		107.1	89.5	112	98.9	128.3	88.6	91.4	High	Not Found	High	High	High	High	High	High	High
FALSE	High	Master Protein	Q99KN9	Clathrin interactor 1 OS=Mus musculus OX=10090 GN=Clint1 PE=1 SV=2	0	41.278	11	7	11	7	1	631	68.5	6.25	44.47	7	0	0.01	1.297	1.194	1.44	1.182	1.224	1.343	1.206	91		118	108.7	131.1	107.6	111.4	122.3	109.8	High	Not Found	High	High	High	High	High	High	High
FALSE	High	Master Protein	Q9JM52	Misshapen-like kinase 1 OS=Mus musculus OX=10090 GN=Mink1 PE=1 SV=3	0	41.277	12	11	13	9	1	1308	147.2	7.44	30.29	11	0	0.01	0.452	0.514	0.495	0.571	0.47	0.45	0.545	200.1		90.5	102.8	99	114.3	94.1	90.1	109	High	High	High	High	High	High	High	High	High
FALSE	High	Master Protein	O55013	Trafficking protein particle complex subunit 3 OS=Mus musculus OX=10090 GN=Trappc3 PE=1 SV=1	0	41.269	38	8	28	8	1	180	20.3	4.96	65.47	8	0	0.744	1.14	0.891	1.12	0.896	1.074	1.124	0.885	101.4	75.5	115.6	90.4	113.6	90.8	108.9	114	89.8	High	High	High	High	High	High	High	High	High
FALSE	High	Master Protein	Q9QYC0	Alpha-adducin OS=Mus musculus OX=10090 GN=Add1 PE=1 SV=2	0	41.243	10	6	22	5	1	735	80.6	5.9	57.5	6	0	0.455	0.868	1.126	0.812	1.007	0.84	0.777	0.998	114.2	51.9	99.1	128.6	92.7	114.9	95.9	88.7	114	High	High	High	High	High	High	High	High	High
FALSE	High	Master Protein	Q9WTX5	S-phase kinase-associated protein 1 OS=Mus musculus OX=10090 GN=Skp1 PE=1 SV=3	0	41.186	37	8	22	8	1	163	18.7	4.54	70.92	8	0	0.215	1.095	1.256	1.258	1.252	1.065	1.096	1.284	94.5	20.3	103.5	118.8	118.9	118.4	100.6	103.6	121.3	High	High	High	High	High	High	High	High	High
FALSE	High	Master Protein	P46660	Alpha-internexin OS=Mus musculus OX=10090 GN=Ina PE=1 SV=3	0	40.621	22	10	14	8	1	501	55.3	5.4	38.18	10	1	0.01	0.578	0.554	0.566	0.582	0.543	0.547	0.558	182.6		105.5	101.2	103.4	106.4	99.1	99.8	101.8	High	High	High	High	High	High	High	High	High
FALSE	High	Master Protein	P10630	Eukaryotic initiation factor 4A-II OS=Mus musculus OX=10090 GN=Eif4a2 PE=1 SV=2	0	40.603	22	6	8	5	1	407	46.4	5.48	26.56	6	0	0.01	0.78	0.79	0.826	0.841	0.834	0.731	0.837	135.6		105.7	107.2	111.9	114	113	99.1	113.4	High	Not Found	High	High	High	High	High	High	High
FALSE	High	Master Protein	P05480	Neuronal proto-oncogene tyrosine-protein kinase Src OS=Mus musculus OX=10090 GN=Src PE=1 SV=4	0	40.6	21	9	18	7	1	541	60.6	7.84	57.25	9	2	0.01	1.07	1.049	1.124	1.058	1.119	1.107	1.064	104.8		112	109.9	117.8	110.9	117.2	116	111.4	High	Not Found	High	High	High	High	High	High	High
FALSE	High	Master Protein	Q8BJH1	Zinc finger C2HC domain-containing protein 1A OS=Mus musculus OX=10090 GN=Zc2hc1a PE=1 SV=1	0	40.176	29	10	36	10	1	324	35.1	9.88	95.85	10	0	0.188	0.665	0.703	0.664	0.731	0.636	0.606	0.692	152.9	28.8	101.8	107.5	101.5	111.8	97.3	92.7	105.8	High	High	High	High	High	High	High	High	High
FALSE	High	Master Protein	Q8BFZ9	Erlin-2 OS=Mus musculus OX=10090 GN=Erlin2 PE=1 SV=1	0	40.049	24	6	12	6	1	340	37.8	5.5	41.99	6	0	0.01	0.813	0.843	0.858	0.921	0.874	0.831	0.895	127.9		104	107.9	109.7	117.8	111.8	106.3	114.6	High	High	High	High	High	High	High	High	High
FALSE	High	Master Protein	Q810J8	Zinc finger FYVE domain-containing protein 1 OS=Mus musculus OX=10090 GN=Zfyve1 PE=1 SV=2	0	40.005	14	8	8	8	1	777	86.9	7.34	28.25	8	0	3.417	0.915	0.901	0.935	0.959	0.916	0.891	0.935	82.8	282.9	75.8	74.6	77.4	79.4	75.8	73.8	77.4	High	High	High	High	High	High	High	High	High
FALSE	High	Master Protein	Q0VE82	Copine-7 OS=Mus musculus OX=10090 GN=Cpne7 PE=1 SV=1	0	39.991	18	8	11	7	1	557	61.9	5.4	33.8	8	0	0.01	1.108	0.849	1.17	0.96	1.174	1.114	1.055	106.8		118.3	90.6	124.9	102.5	125.3	119	112.6	High	Not Found	High	High	High	High	High	High	High
FALSE	High	Master Protein	Q8CI71	Syndetin OS=Mus musculus OX=10090 GN=Vps50 PE=1 SV=2	0	39.979	14	7	10	7	1	964	111.1	6.07	31.8	7	0	0.01	0.695	0.485	0.679	0.485	0.836	0.63	0.586	166.8		115.9	80.8	113.3	80.9	139.4	105.1	97.7	High	Not Found	High	High	High	High	High	High	High
FALSE	High	Master Protein	Q8C6G8	WD repeat-containing protein 26 OS=Mus musculus OX=10090 GN=Wdr26 PE=1 SV=3	0	39.907	17	7	13	7	1	641	70.5	6.16	40.62	7	0	2.095	1.183	1.024	1.274	1.05	1.041	1.183	1.067	82.5	172.7	97.6	84.4	105	86.6	85.8	97.5	87.9	High	High	High	High	High	High	High	High	High
FALSE	High	Master Protein	Q9JIA1	Leucine-rich glioma-inactivated protein 1 OS=Mus musculus OX=10090 GN=Lgi1 PE=1 SV=1	0	39.848	14	8	19	8	1	557	63.6	8.02	49.55	8	0	0.01	1.059	0.842	1.046	0.87	1.001	1.063	0.894	115.7		122.6	97.5	121.1	100.7	115.9	123.1	103.5	High	Not Found	High	High	High	High	High	High	High
FALSE	High	Master Protein	P62137	Serine/threonine-protein phosphatase PP1-alpha catalytic subunit OS=Mus musculus OX=10090 GN=Ppp1ca PE=1 SV=1	0	39.812	22	6	13	1	1	330	37.5	6.33	55.37	6	0	0.421	0.675	0.664	0.677	0.681	0.722	0.666	0.72	144.6	60.8	97.6	96	97.9	98.4	104.3	96.2	104.1	High	High	High	High	High	High	High	High	High
FALSE	High	Master Protein	Q9EQZ6	Rap guanine nucleotide exchange factor 4 OS=Mus musculus OX=10090 GN=Rapgef4 PE=1 SV=1	0	39.787	13	12	14	12	1	1011	115.4	6.92	37.64	12	0	0.01	0.921	0.739	0.845	0.906	0.809	0.835	0.899	129.4		119.2	95.7	109.4	117.3	104.7	108.1	116.3	High	High	High	High	High	High	High	High	High
FALSE	High	Master Protein	Q80TY0	Formin-binding protein 1 OS=Mus musculus OX=10090 GN=Fnbp1 PE=1 SV=2	0	39.781	15	9	13	9	1	616	71.3	5.67	35.76	9	0	0.01	1.1	0.948	1.014	0.855	1.029	0.98	0.861	115.6		127.1	109.5	117.2	98.8	119	113.3	99.5	High	High	High	High	High	High	High	High	High
FALSE	High	Master Protein	Q9JKR6	Hypoxia up-regulated protein 1 OS=Mus musculus OX=10090 GN=Hyou1 PE=1 SV=1	0	39.778	12	9	11	9	1	999	111.1	5.19	28.09	9	0	0.01	1.065	0.959	1.172	1.084	1.018	1.141	1.056	106		112.8	101.6	124.1	114.8	107.9	120.9	111.9	High	Not Found	High	High	High	High	High	High	High
FALSE	High	Master Protein	P31938	Dual specificity mitogen-activated protein kinase kinase 1 OS=Mus musculus OX=10090 GN=Map2k1 PE=1 SV=2	0	39.718	24	6	13	4	1	393	43.4	6.7	54.73	6	1	0.01	1.029	0.987	0.971	1.06	0.998	0.914	1.035	112.6		115.9	111.1	109.3	119.3	112.4	102.9	116.5	High	Not Found	High	High	High	High	High	High	High
FALSE	High	Master Protein	O54829	Regulator of G-protein signaling 7 OS=Mus musculus OX=10090 GN=Rgs7 PE=1 SV=2	0	39.705	12	5	14	2	1	469	54.8	8.13	52.38	5	0	0.01	1.671	1.251	1.707	1.501	1.619	1.661	1.622	74.8		125	93.6	127.6	112.3	121.1	124.3	121.3	High	Not Found	High	High	High	High	High	High	High
FALSE	High	Master Protein	Q8CBY8	Dynactin subunit 4 OS=Mus musculus OX=10090 GN=Dctn4 PE=1 SV=1	0	39.649	21	5	10	5	1	467	53	7.72	34.99	5	0	0.01	1.363	1.218	1.365	1.327	1.436	1.44	1.294	86.2		117.5	105	117.6	114.4	123.7	124.1	111.5	High	High	High	High	High	High	High	High	High
FALSE	High	Master Protein	Q923S9	Ras-related protein Rab-30 OS=Mus musculus OX=10090 GN=Rab30 PE=1 SV=1	0	39.635	35	6	60	4	1	203	23	4.97	187.59	6	0	0.01	1.03	0.887	1.067	0.914	0.992	1.051	0.908	114.7		118.1	101.7	122.4	104.9	113.7	120.5	104.1	High	Not Found	High	High	High	High	High	High	High
FALSE	High	Master Protein	P31648	Sodium- and chloride-dependent GABA transporter 1 OS=Mus musculus OX=10090 GN=Slc6a1 PE=1 SV=2	0	39.608	10	3	13	3	1	599	67	7.96	70.91	3	0	0.01	1.303	1.127	1.195	1.069	1.262	1.364	1.03	96.3		125.4	108.5	115	102.9	121.4	131.3	99.2	High	High	High	High	High	High	High	High	High
FALSE	High	Master Protein	O88643	Serine/threonine-protein kinase PAK 1 OS=Mus musculus OX=10090 GN=Pak1 PE=1 SV=1	0	39.608	15	6	22	4	1	545	60.7	5.74	63.77	6	1	0.01	1.069	1.042	1.071	1.097	1.062	1.044	1.062	106.5		113.9	111	114.1	116.9	113.1	111.2	113.2	High	High	High	High	High	High	High	High	High
FALSE	High	Master Protein	P63087	Serine/threonine-protein phosphatase PP1-gamma catalytic subunit OS=Mus musculus OX=10090 GN=Ppp1cc PE=1 SV=1	0	39.59	23	6	14	1	1	323	37	6.54	57.84	6	0	0.01	0.743	1.067	0.819	1.223	0.915	0.735	1.152	117.6		87.3	125.5	96.3	143.8	107.6	86.4	135.5	High	Not Found	High	High	High	High	High	High	High
FALSE	High	Master Protein	P09405	Nucleolin OS=Mus musculus OX=10090 GN=Ncl PE=1 SV=2	0	39.463	14	7	15	7	1	707	76.7	4.75	40.94	7	0	0.01	0.572	0.559	0.609	0.588	0.571	0.632	0.593	175.7		100.4	98.1	107	103.3	100.3	111.1	104.1	High	High	High	High	High	High	High	High	High
[truncated: 2,092 more rows]

## Sheet: E2
Checked	Protein FDR Confidence: Combined	Master	Accession	Description	Exp. q-value: Combined	Sum PEP Score	Coverage [%]	# Peptides	# PSMs	# Unique Peptides	# Protein Groups	# AAs	MW [kDa]	calc. pI	Score Sequest HT: Sequest HT	# Peptides (by Search Engine): Sequest HT	# Razor Peptides	Abundance Ratio: (127N) / (126)	Abundance Ratio: (128N) / (126)	Abundance Ratio: (129C) / (126)	Abundance Ratio: (130N) / (126)	Abundance Ratio: (131) / (126)	Abundances (Grouped): 126	Abundances (Grouped): 127N	Abundances (Grouped): 128N	Abundances (Grouped): 129C	Abundances (Grouped): 130N	Abundances (Grouped): 131	Found in Sample: [S1] F1: 126, Control	Found in Sample: [S2] F1: 127N, Sample	Found in Sample: [S3] F1: 128N, Sample	Found in Sample: [S4] F1: 129C, Sample	Found in Sample: [S5] F1: 130N, Sample	Found in Sample: [S6] F1: 131, Sample
[truncated: 3,827 more rows]
