# Supplementary material for: Importance of glutamine in synaptic vesicles revealed by functional studies of SLC6A17 and its mutations pathogenic for intellectual disability
Source: eLife. 2023 Jul 13;12:RP86972. doi: 10.7554/eLife.86972 (PMC10393021; doi:10.7554/eLife.86972)
Supplement: Figure 3—figure supplement 2—source data 1. [file elife-86972-fig3-figsupp2-data1.xlsx]

## Sheet: S4A
Male				Female
+/+	P633R/+	P633R/P633R		+/+	P633R/+	P633R/P633R
25	34.2	27		17	19	22
28	30	24		26.7	20	23
30	31.3	23		26	20	19
28	34	26		24.7	21	23
29.7	27	32.7		24.2	20	22
31	27	32.4		23.1	20	25.6
30.7	28	29.2		20	24	24.1
29		29.8		20	26.7	24.5
31.3		29.3		21	28.1	19
30		26		18	24.3	18
27				19	24.1	16
					24	19
					20
					19
					17
					20
					20
					20
					20

## Sheet: S4B
+/+	P633R/+	P633R/P633R
2040.71	2291.06	2445.78
1418.58	2747.73	2649.35
2469.75	2872.46	2643.75
3407.79	2180.61	3049.11
4159.63	1688.69	2140.04
2770.1	2215.65	3209.36
2843.86	2742.17	3049.32
2734.2	2294.52	2583.42
2340.47	2009.37	4331.63
2520.72	2679.24	2327.51
2749.06	2871.81	6193.09
2399.79	2705.8	1838.8
2207.25	1982.38	2186.46
2844.62	2830.95	2448.49
2543.43	1896.12	2813.58
3344.06	2623.08	2202.77
2657.18	2706.89	1703.05
2571.14	2164.27	1663.89
2274.37	1350.54	2083.37
2435.29	2137.17	2226.66
2123.45	3058.5	1391.97
2388.2	2568.92	1966.22
	1989.45
	1991.81
	2807.91
	2956.99

## Sheet: S4C
+/+	P633R/+	P633R/P633R
0.811542	0.53724	0.627182
0.714752	0.681838	0.459536
0.489888	0.593999	0.602789
0.670635	0.542775	0.832712
0.710509	0.925173	0.570255
0.679096	0.758482	0.654557
0.739208	0.945863	0.853648
0.357662	0.790269	0.259539
0.619855	0.894252	0.672524
0.570049	0.602311	0.5599
0.745098	0.781885	0.761184
0.759644	0.790392	0.654557
0.771043	0.600733	0.853648
0.917201	0.581063	0.259539
0.836964	0.545055	0.672524
0.357662	0.744974	0.5599
0.619855	0.443165	0.761184
0.570049	0.663147
0.745098	0.76706
0.759644	0.781885
0.771043	0.790392
0.917201	0.600733
0.836964	0.581063
	0.545055
	0.744974
	0.443165
	0.663147
	0.76706

## Sheet: S4D
+/+	P633R/+	P633R/P633R
5835.85	6591.98	9308.39
7952.61	5895.33	7140.86
6608.7	5750.39	6504.53
8974.26	5232.26	7923.35
6529.85	4175.95	5208.97
6766.02	7164.8	6385.27
6508.49	6886.67	8140.68
5191.61	6368.39	7441.7
4040.12	8172.9	6357.61
5121.53	5350.82	5595.57
6075.75	6860.87	6281.84
7817.21	8360.84	6256.35
5786.27	9631.68	14017.2
6323.98	9953.79	9520.15
7290.13	3395.75	10284.4
11525.5	8246.18	13063.2
16015	10050	7723.88
18253.6	8420.06
9776.02	12584.4
13661.3	10592.5
4740.27	8733.44
10455.4	10515.4
	8071.34
	12078.3
	13207
	6884.68

## Sheet: S4E
+/+	P633R/+	P633R/P633R
27.81	47.36	9.41
3.74	18.74	46.37
3.42	3	2.15
0.21	13.02	17.41
1.67	1.53	30.48
5.66	23.76	63.83
4.82	13.14	17.68
12.67	11.14	56.84
0.37	31.35	78.65
9.12	16.21	43.98
1.85	12.09	15.57
15.43	2.76	50.47
2.81	8.2	22.82
9.89	9.12	25
12.69	23.76	48.91
1.07	15.36	13.07
4.94	0.53	39.1
6.87	18.56
15.27	8.92
2	33.43
1.47	11.22
1.13	6.08
	1.67
	2.35
	7.27
	0.88

## Sheet: S4F
+/+	P633R/+	P633R/P633R
124.17	12.65	4130.18
421.97	868.06	952.55
935.95	328.72	2233.42
23.24	553.33	3069.83
144.44	408.59	751.05
330.06	165	2434.73
745.29	54.95	295.45
64.12	94.04	3065.06
60.98	188.35	67.09
86.77	10.59	653.64
1783.06	1933.68	1633.56
115.4	941.19	3473.84
99.44	71.78	1473.39
5	801.93	4689.8
25.32	26.79	7188.27
277.31	1314.8	5403.68
204.22	790.38	549.31
638.93	638.64
23.73	2239.84
618.9	756.91
89.85	507.33
1163.92	65.44
	307.57
	326.85
	1380.4
	706.78
