# Supplementary material for: Importance of glutamine in synaptic vesicles revealed by functional studies of SLC6A17 and its mutations pathogenic for intellectual disability
Source: eLife. 2023 Jul 13;12:RP86972. doi: 10.7554/eLife.86972 (PMC10393021; doi:10.7554/eLife.86972)
Supplement: Figure 6—source data 1. [file elife-86972-fig6-data1.xlsx]

## Sheet: 6C
	L-Glutamic_acid	GABA	Acetylcholine	L-Proline	L-Leucine	L-Glycine	L-Alanine	L-Glutamine	L-Cysteine	L-Methionine	L-Serine	L-Histidine
HA/+ 1	1.17917e+09	3.47696e+07	1.49939e+08	2.03643e+07	3.78302e+07	3.35754e+07	1.12147e+07	5.73415e+07	0	3.08373e+06	1.01288e+07	6.24536e+06
HA/+ 2	1.21681e+09	3.7144e+07	1.41889e+08	1.37421e+07	4.05082e+07	1.9337e+07	1.1079e+07	5.76519e+07	0	3.53714e+06	1.00134e+07	7.31415e+06
HA/+ 3	1.24582e+09	3.82158e+07	1.35043e+08	1.01276e+07	3.31633e+07	5.06659e+06	8.46975e+06	5.59064e+07	0	2.8894e+06	6.11223e+06	5.07629e+06
HA/+ 4	9.03856e+08	2.64389e+07	1.01828e+08	1.69266e+07	4.08452e+07	5.00579e+06	8.34906e+06	4.87552e+07	0	3.56505e+06	9.49468e+06	4.0503e+06
HA/+ 5	8.21697e+08	2.32079e+07	9.49067e+07	2.43936e+07	3.56332e+07	7.17868e+06	7.67261e+06	4.10621e+07	0	2.11622e+06	1.17235e+07	3.59939e+06
HA/+ 6	8.51667e+08	2.58067e+07	9.92043e+07	2.88171e+07	5.05509e+07	1.2001e+07	1.32861e+07	4.20816e+07	0	2.85669e+06	1.1562e+07	4.15684e+06
HA/+ 7	7.4507e+08	2.48061e+07	8.37337e+07	1.24723e+07	3.6014e+07	1.37529e+07	9.36799e+06	3.99438e+07	0	2.93502e+06	8.92049e+06	6.93187e+06
HA/+ 8	7.68731e+08	2.29275e+07	8.69728e+07	1.34415e+07	3.86689e+07	1.3994e+07	9.45045e+06	3.74853e+07	0	3.29301e+06	8.30326e+06	7.33231e+06
HA/+ 9	7.40922e+08	2.34209e+07	8.10026e+07	1.10074e+07	4.08071e+07	9.0838e+06	8.00093e+06	3.58279e+07	0	2.42617e+06	6.97325e+06	5.4229e+06
HA/+ 10	7.192e+08	2.031e+07	7.97639e+07	2.15041e+07	3.69865e+07	4.70602e+06	8.9292e+06	3.82884e+07	0	1.93714e+06	1.08261e+07	4.87423e+06
HA/+ 11	6.96369e+08	1.97489e+07	7.64345e+07	1.87497e+07	3.4194e+07	7.88124e+06	8.02328e+06	3.56008e+07	0	1.84278e+06	7.16122e+06	3.45656e+06
HA/+ 12	7.01661e+08	1.93164e+07	8.10872e+07	2.38502e+07	4.10204e+07	7.2485e+06	8.7631e+06	3.45053e+07	0	2.10462e+06	1.00615e+07	3.77421e+06
+/+ 1	3.29742e+07	3.78149e+06	6.64213e+06	1.26309e+07	3.0948e+07	1.19185e+07	8.12265e+06	5.53349e+06	0	2.49096e+06	1.07221e+07	6.65002e+06
+/+ 2	3.66696e+07	4.19778e+06	6.37225e+06	1.07363e+07	3.19468e+07	6.53984e+07	5.23623e+06	6.78961e+06	0	1.84926e+06	5.50813e+06	1.93486e+06
+/+ 3	3.79405e+07	6.39966e+06	5.39594e+06	1.5109e+07	4.60149e+07	2.18972e+07	7.55475e+06	7.37908e+06	0	3.13648e+06	6.922e+06	3.14233e+06
+/+ 4	2.98453e+07	4.20808e+06	3.40262e+06	1.33311e+07	3.194e+07	5.32604e+06	4.79985e+06	6.39094e+06	0	1.93474e+06	4.85203e+06	1.44673e+06
+/+ 5	4.04914e+07	5.06534e+06	3.85982e+06	3.14784e+07	5.70344e+07	2.05564e+07	1.09119e+07	9.74566e+06	0	7.37866e+06	1.03038e+07	3.13512e+06
+/+ 6	4.40609e+07	4.87044e+06	3.82084e+06	5.69747e+07	7.36055e+07	2.64321e+07	2.44774e+07	8.37353e+06	0	3.2579e+06	3.49182e+07	4.9506e+06
+/+ 7	3.21437e+07	5.01594e+06	4.26986e+06	9.93973e+06	2.90402e+07	1.508e+07	6.33032e+06	6.41704e+06	0	2.28929e+06	6.36245e+06	3.45731e+06
+/+ 8	3.79143e+07	4.47364e+06	4.27361e+06	1.56289e+07	3.79438e+07	1.85715e+07	7.58709e+06	7.59239e+06	0	3.22137e+06	9.13271e+06	5.51535e+06
+/+ 9	8.21958e+07	7.87773e+06	3.68294e+06	1.23435e+07	3.99419e+07	1.21011e+07	1.0334e+07	1.96134e+07	0	3.95424e+06	6.27239e+06	3.85103e+06
+/+ 10	3.28175e+07	4.84464e+06	4.95548e+06	1.70606e+07	4.1775e+07	2.11329e+07	6.80163e+06	8.31395e+06	0	2.81278e+06	7.36224e+06	2.13667e+06
+/+ 11	3.74866e+07	4.58017e+06	3.15042e+06	3.64758e+07	6.56273e+07	2.48641e+07	1.35222e+07	9.93454e+06	0	4.24892e+06	2.47173e+07	1.03683e+07
+/+ 12	5.2513e+07	6.44277e+06	4.16903e+06	3.44321e+07	5.00461e+07	8.26378e+06	1.00309e+07	1.35246e+07	0	2.37583e+06	1.53065e+07	2.98013e+06
p.value	2.32368e-08	1.92372e-07	6.27355e-08	0.365818	0.20679	0.080785	0.874606	2.4223e-09	0	0.274938	0.353763	0.220005
Log2_FC	4.41329	2.35575	4.48819	-0.305197	-0.20085	-0.857472	-0.0392144	2.25845	0.001	-0.257345	-0.355546	0.328292

## Sheet: 6D
Glu	GABA	ACh	Pro	Leu	Gly	Ala	Gln	Cys	Met	Ser	His
4.35	1.48	4.88	0	-0.02	0.49	0	2.45	0	-0.16	-0.22	0.46
4.13	1.78	5.5	0	-0.04	0.94	0	2.36	0	0.04	-0.29	0.58
3.9	1.9	5.14	0	0.32	0.01	0	2.19	0	0.84	0.62	0.97
3.8	3.44	4.35	-0.35	-0.29	-4.28	-0.59	2.1	0	-0.16	-0.9	-0.47
3.87	3.31	4.37	-0.06	-0.16	0.62	-0.28	2.69	0	0.25	-0.03	0.3
3.45	2.75	4.35	-0.31	-0.35	-3.86	-0.86	2.36	0	-0.46	-1.03	-0.63
3.88	2.06	4.36	-0.02	0.01	-0.15	0.21	1.83	0	-0.1	0.3	0.7
3.92	1.96	4.42	0.09	0.12	-0.12	0.23	1.74	0	0.06	0.19	0.78
3.87	2.01	4.31	-0.2	0.2	-0.75	-0.01	1.68	0	-0.38	-0.06	0.34
4.24	2.12	4.43	-0.66	-0.55	-1.89	-0.59	2.23	0	-1.11	-0.62	0.62
4.19	2	4.37	-0.86	-0.66	-1.15	-0.74	2.12	0	-1.19	-1.22	0.12
4.2	2.02	4.46	-0.51	-0.4	-1.27	-0.61	2.08	0	-0.99	-0.73	0.25
5.04	2.81	4.61	0.67	0.06	0.02	0.69	3.13	0	0.31	0.39	0.68
5.08	2.88	4.53	0.1	0.16	-0.77	0.67	3.13	0	0.51	0.38	0.9
5.12	2.84	4.46	-0.34	-0.13	-2.71	0.28	3.09	0	0.21	-0.34	0.38
4.46	2.17	4.64	-0.79	-0.36	-1.85	-0.28	2.2	0	0.18	-0.73	-0.35
4.33	2.08	4.54	-0.27	-0.56	-1.33	-0.4	1.95	0	-0.57	-0.43	-0.52
4.38	2.09	4.6	-0.03	-0.05	-0.59	0.39	1.99	0	-0.14	-0.45	-0.31

## Sheet: 6E
HA/+	+/+
207.66	7.44
211.69	7.81
219.21	8.22
151.21	5.84
140.48	7.95
139.29	8.57
150.77	7.42
145.03	8.45
147.3	17.66
125.81	6.24
120.68	7.6
113.9	10.42

## Sheet: 6F
HA/+	+/+
19.7	2.25
21.35	2.39
21.72	3.69
14.11	2.14
11.86	2.62
13.09	2.62
15.11	2.96
13.38	2.64
14.32	4.52
10.88	2.46
10.19	2.5
9.52	3.42

## Sheet: 6G
HA/+	+/+
2.72	0.11
2.57	0.1
2.45	0.08
1.84	0.05
1.72	0.06
1.79	0.05
1.51	0.06
1.57	0.06
1.46	0.05
1.44	0.08
1.38	0.04
1.46	0.06

## Sheet: 6H
HA/+	+/+
19.34	1.95
19.24	2.33
19.5	2.5
14.93	1.98
12.95	2.99
12.67	2.64
14.3	2.29
13.11	2.69
13.08	6.81
11.91	2.52
11.71	3.12
10.84	4.27

## Sheet: 6I
HA/+	+/+
8.27	9.52
8.29	4.61
5.47	5.93
7.5	3.99
9.49	8.36
9.23	28.76
7.3	5.22
7.47	8.06
6.17	5.65
8.51	5.74
6.01	19.15
8.25	12.56
