# Supplementary material for: Importance of glutamine in synaptic vesicles revealed by functional studies of SLC6A17 and its mutations pathogenic for intellectual disability
Source: eLife. 2023 Jul 13;12:RP86972. doi: 10.7554/eLife.86972 (PMC10393021; doi:10.7554/eLife.86972)
Supplement: Figure 7—figure supplement 1—source data 3. [file elife-86972-fig7-figsupp1-data3.xlsx]

## Sheet: S9B
	Glutamate	GABA	Acetylcholine	L-Proline	L-Leucine	Glycine	L-Alanine	L-glutamine	L-Cysteine	L-Methionine	L-Serine	L-Histidine
G162R-1	2.94211e+08	3.58229e+07	9.09299e+07	5.1202e+06	1.2382e+07	1.32884e+06	1.01397e+07	1.24749e+07	104417	4.1687e+06	3.61118e+06	2.38228e+06
G162R-2	3.08032e+08	3.43105e+07	8.98794e+07	7.77074e+06	1.00319e+07	1.79953e+06	1.3435e+07	1.52548e+07	74309.3	3.38097e+06	5.16265e+06	5.75381e+06
G162R-3	5.213e+08	3.79032e+07	2.03521e+08	7.18607e+06	5.85171e+06	1.93234e+06	7.0125e+06	2.0362e+07	263246	2.91565e+06	3.81685e+06	4.17177e+06
G162R-4	6.243e+08	7.37062e+07	1.97409e+08	2.77903e+06	4.40399e+06	4.33971e+06	4.30604e+06	2.69002e+07	267313	774508	2.9743e+06	1.4469e+06
G162R-5	3.98049e+08	3.31522e+07	8.67075e+07	1.73025e+06	1.26718e+06	2.74726e+06	2.82263e+06	1.389e+07	0	58168.6	2.04477e+06	872555
G162R-6	5.54706e+08	6.3607e+07	1.08062e+08	1.92771e+06	1.9589e+06	1.88874e+08	4.72039e+06	1.9301e+07	0	525538	2.85647e+06	1.59609e+06
G162R-7	2.81012e+08	2.33203e+07	4.8068e+07	1.06743e+06	2.92009e+06	5.40066e+06	3.28005e+06	1.38137e+07	0	672438	2.50748e+06	1.06564e+06
G162R-8	3.4089e+08	2.09017e+07	8.18223e+07	3.50446e+06	5.49116e+06	1.91754e+06	3.78049e+06	9.42532e+06	0	661861	3.47484e+06	1.66828e+06
G162R-9	3.11814e+08	2.88649e+07	7.05911e+07	2.74623e+06	4.26549e+06	6.39276e+06	3.25284e+06	1.22755e+07	0	576468	3.39649e+06	1.72188e+06
WT-1	5.72061e+06	2.0681e+06	1.21291e+06	1.5099e+06	2.4738e+06	6.59389e+06	782849	1.84317e+06	0	376618	2.3783e+06	646707
WT-2	7.59571e+06	1.50624e+06	4.68375e+06	3.83165e+06	6.30913e+06	7.05909e+06	2.74037e+06	2.44812e+06	0	897236	4.88221e+06	709477
WT-3	6.95164e+06	1.24281e+06	760443	1.29106e+06	2.57543e+06	1.46642e+06	948778	2.36057e+06	0	51118.5	2.22223e+06	529670
p.value	1.56508e-05	0.000233357	0.000379483	0.221979	0.393836	0.389745	0.00982869	5.18599e-05	0	0.083002	0.877668	0.0148025
Log2_FC	5.90138	4.6046	5.61234	0.765783	0.511421	2.2431	1.97521	2.84817	0.1	1.78879	0.0691518	1.86993

## Sheet: S9C
OE	WT
2.4005	2.26586
2.39141	1.99046
2.29826	1.91542
2.2687	1.91435
2.07292	1.86359
2.22502	1.83488
2.15323	1.83422
2.68677	2.05824
2.5081	1.96067
2.69027	2.02833

## Sheet: S9D
SLC6A17-HA	SLC6A17-HA G162R	Syp-HA	WT
2.20322	1.8914	1.91394	1.79038
2.15442	1.98024	1.91495	1.79583
2.01247	1.98814	2.14338	1.78024
3.65974	1.87859	2.03216	3.53349
2.10603	1.82132	2.06191	1.77264
2.4039	1.89347	1.98994	1.83144
2.22601	1.97187
2.39337	2.30809
2.19912	2.15032
