# Supplementary material for: Importance of glutamine in synaptic vesicles revealed by functional studies of SLC6A17 and its mutations pathogenic for intellectual disability
Source: eLife. 2023 Jul 13;12:RP86972. doi: 10.7554/eLife.86972 (PMC10393021; doi:10.7554/eLife.86972)
Supplement: Figure 8—source data 1. [file elife-86972-fig8-data1.xlsx]

## Sheet: 8A
+/+	+/-	-/-
263.455	261.842	271.227
249.494	219.248	286.655
240.002	261.529	264.097
343.835	266.51	358.368
321.394	271.112	335.695
318.64	280.35	341.375
333.619	311.513	326.821
314.312	294.841	296.656
314.283	299.51	292.299
260.976	348.026	332.793
277.202	344.973	348.643
265.587	323.503	328.38

## Sheet: 8B
+/+	+/-	-/-
56.886	38.9002	42.2305
50.2252	31.9544	45.0989
47.861	42.2268	35.2432
51.7324	33.573	71.7755
43.1147	38.2815	62.6803
39.9766	40.8268	54.4176
68.9172	53.5184	59.2977
51.5967	43.8863	47.1765
49.0413	42.4593	40.6497
41.1517	69.68	63.2301
50.8739	59.3178	62.8973
44.3713	53.9297	60.4111

## Sheet: 8C
+/+	+/-	-/-
7.44	4.84	7.47
7.65	3.67	7.63
7.17	4.31	7.27
4.69	5.15	5.05
3.44	4.72	3.2
4.44	4.8	4.75
2.51	2.52	3.03
2.53	2.53	2.89
2.5	2.55	2.62
4.19	4.79	4.05
4.4	4.85	4.39
4.2	4.55	3.83

## Sheet: 8D
+/+	+/-	-/-
2.17031	1.46268	1.56002
1.1166	1.29506	1.21939
1.10253	1.33178	1.12291
2.31417	3.82999	1.24755
0.953864	1.44051	1.33439
1.24668	1.84001	1.46558
0.839564	0.925949	1.64685
1.04316	0.821047	0.962755
0.740433	0.690255	0.822302
0.820913	1.50601	1.06096
1.39715	0.704287	0.899747
0.827572	0.938247	0.950032

## Sheet: 8E
+/+	+/-	-/-
1.65836	1.981	2.05502
0.789186	1.84103	1.10031
0.848456	1.8506	0.922821
0.836627	2.62888	0.835215
0.782938	1.36937	0.699033
0.984194	1.95898	1.60342
0.486592	0.596508	0.922071
0.464405	0.285574	0.254734
0.308262	0.47288	0.378465
0.412887	0.368055	0.609003
0.47355	0.46096	0.338757
0.238496	0.183591	0.346373

## Sheet: 8F
+/+	+/-	-/-
	52.4	102.09
83.02	56.78	97.44
92.91	46.64	245.82
30.79	77.27	36.69
23.03	55.93	14.63
44.55	70.41	115.7
22.98	45.9	27.45
18.54	13.7	10.65
16.89	34.88	13.63
63.19	47.91	84.52
37.71	51.66	119.7
35.7	29.49	52.2

## Sheet: 8G
+/+	+/-	-/-
16.389	6.43587	12.0109
9.78511	5.29521	11.5596
9.65291	4.75632	10.211
4.85157	8.97047	4.77818
4.66646	4.46269	5.16377
5.43356	6.05341	8.53674
7.91955	7.90047	11.9656
5.28809	4.16298	4.48224
5.56814	6.0242	5.57635
7.8612	10.6609	12.0136
9.94584	7.55982	8.94916
8.37788	6.45132	9.71263

## Sheet: 8H
+/+	+/-	-/-
21.9803	45.6219	12.039
30.8158	20.4677	16.7597
16.4329	23.944	15.1136
35.3057	35.6023	16.7262
22.4423	21.2469	12.8439
25.0747	25.0905	15.9792
23.9857	15.3188	11.3958
15.8156	12.5315	8.75927
18.3569	15.6806	10.4238
15.0567	12.781	12.5795
14.2003	14.3285	10.3799
18.9639	13.1147	11.7031

## Sheet: 8I
+/+	+/-	-/-
1.53673	0	1.51099
1.50382	0	1.49087
1.49976	0	1.49243
1.5004	0	1.47343
1.48107	0	1.46843
1.46843	0	1.47342
1.50507	1.4928	1.47927
1.46843	1.48171	1.47913
1.48832	1.4921	1.46843

## Sheet: 8J
+/+	+/-	-/-
0.760016	1.40932	0.69157
0.686104	1.04836	0.727183
0.664808	1.03348	0.652649
0.776954	1.12893	0.689084
0.637347	0.797452	0.607469
0.68951	1.04355	0.770327
0.574878	0.62584	0.584917
0.544601	0.535079	0.514554
0.542452	0.578655	0.54597
0.629442	0.540599	0.611415
0.582666	0.584797	0.559757
0.568643	0.53085	0.554048

[truncated: 2 more sheets: 8K, 8L]
