# Supplementary material for: Importance of glutamine in synaptic vesicles revealed by functional studies of SLC6A17 and its mutations pathogenic for intellectual disability
Source: eLife. 2023 Jul 13;12:RP86972. doi: 10.7554/eLife.86972 (PMC10393021; doi:10.7554/eLife.86972)
Supplement: Figure 9—source data 1. [file elife-86972-fig9-data1.xlsx]

## Sheet: 9C
	Glutamate	GABA	Acetylcholine	L-Proline	L-Leucine	Glycine	L-Alanine	L-glutamine	L-Cysteine	L-Methionine	L-Serine	L-Histidine
Cre/+::Cas9/+ 1	1.46237e+09	7.69282e+07	2.45652e+08	1.3189e+07	3.29407e+07	6.35513e+06	3.25306e+06	2.60318e+07	0	2.0085e+06	5.43768e+06	9.86744e+06
Cre/+::Cas9/+ 2	1.21177e+09	7.56083e+07	2.80562e+08	1.79887e+07	4.07881e+07	1.09372e+07	4.17364e+06	2.29877e+07	0	2.51071e+06	7.87097e+06	5.91093e+06
Cre/+::Cas9/+ 3	1.15558e+09	5.5007e+07	2.35544e+08	1.06925e+07	2.96367e+07	6.19263e+06	1.83384e+06	2.31113e+07	0	1.91637e+06	4.6163e+06	3.32295e+06
Cre/+::Cas9/+ 4	1.40667e+09	7.16241e+07	2.6941e+08	1.31869e+07	2.99715e+07	8.49766e+06	2.42155e+06	3.18258e+07	0	2.2211e+06	5.94964e+06	4.29003e+06
Cre/+::Cas9/+ 5	1.64226e+09	8.70533e+07	2.67751e+08	1.40422e+07	3.07688e+07	1.27653e+07	3.41822e+06	2.89705e+07	0	2.10932e+06	7.72649e+06	3.10128e+06
Cre/+::Cas9/+ 6	1.53073e+09	8.53249e+07	2.70643e+08	1.5317e+07	2.62903e+07	6.18811e+06	2.4505e+06	2.96704e+07	0	1.57644e+06	6.15109e+06	4.06013e+06
Cre/+::Cas9/+ 7	2.10645e+09	1.29036e+08	3.25578e+08	4.90429e+07	7.25782e+07	3.78938e+07	2.39348e+07	6.10634e+07	420562	9.95788e+06	3.64433e+07	1.5049e+07
Cre/+::Cas9/+ 8	2.19938e+09	1.36249e+08	3.54795e+08	2.55928e+07	3.01032e+07	3.8479e+07	1.34581e+07	4.8754e+07	488806	6.40328e+06	1.38953e+07	6.39193e+06
Cre/+::Cas9/+ 9	2.37416e+09	1.31185e+08	3.80351e+08	2.83356e+07	3.9173e+07	3.36925e+07	1.55749e+07	6.10944e+07	476547	8.57695e+06	1.53293e+07	7.56292e+06
Cre/+::Cas9/+ 10	1.9154e+09	1.44411e+08	3.17585e+08	2.48575e+07	3.10032e+07	3.49066e+07	1.43229e+07	5.0668e+07	669911	7.69391e+06	1.37785e+07	6.41279e+06
Cre/+::Cas9/+ 11	1.12696e+09	1.0757e+08	2.14573e+08	1.7084e+07	2.74112e+07	3.11501e+07	1.34425e+07	4.41326e+07	304394	3.91521e+06	1.05117e+07	6.80666e+06
Cre/+::Cas9/+ 12	2.19119e+09	1.40655e+08	3.43789e+08	2.14137e+07	3.60649e+07	3.09772e+07	1.49255e+07	6.2574e+07	781270	7.6229e+06	1.43597e+07	6.61033e+06
Cre/+::Cas9/+ 13	3.12019e+09	2.34557e+08	3.14678e+08	2.50019e+07	3.1235e+07	9.41165e+07	1.71021e+07	6.03353e+07	611900	9.3502e+06	1.1048e+07	6.39298e+06
Cre/+::Cas9/+ 14	1.7986e+09	1.72726e+08	2.34064e+08	1.96505e+07	1.57888e+07	2.66828e+07	9.48865e+06	3.44072e+07	226387	1.73033e+06	7.75388e+06	5.91444e+06
Cre/+::Cas9/+ 15	3.02236e+09	2.10028e+08	3.11161e+08	2.42857e+07	2.64626e+07	3.27955e+07	1.64849e+07	6.17202e+07	510297	7.20703e+06	1.25644e+07	6.26535e+06
Cre/+::Cas9/+ 16	2.94409e+09	3.65387e+08	5.24649e+08	3.3272e+07	3.04989e+07	2.03514e+07	8.50959e+06	3.71654e+07	695379	7.52684e+06	9.28669e+06	6.22451e+06
Cre/+::Cas9/+ 17	2.84892e+09	3.1856e+08	5.17388e+08	2.44269e+07	1.9205e+07	2.46389e+07	5.56259e+06	3.65966e+07	580569	5.89412e+06	6.62752e+06	5.31311e+06
Cre/+::Cas9/+ 18	2.29703e+09	1.44774e+08	5.08698e+08	1.9982e+07	1.78101e+07	9.81319e+06	4.80813e+06	3.59691e+07	418346	5.24343e+06	6.64272e+06	4.88859e+06
Cre/+::Cas9/+ 19	2.40079e+09	1.55862e+08	3.48835e+08	1.54211e+07	3.40944e+07	3.10484e+07	1.08821e+07	4.86374e+07	0	2.14218e+07	9.98407e+06	5.14565e+06
Cre/+::Cas9/+ 20	2.75562e+09	2.37615e+08	3.5535e+08	2.09322e+07	7.06222e+07	5.93293e+07	1.24949e+07	4.36833e+07	345103	4.64762e+07	1.50225e+07	1.05574e+07
Cre/+::Cas9/+ 21	2.5698e+09	1.90744e+08	3.31004e+08	1.51126e+07	5.09802e+07	4.44547e+07	7.79928e+06	4.32252e+07	0	2.55409e+07	1.15089e+07	5.42063e+06
Cre/+::Cas9/+ 22	2.31047e+09	1.93971e+08	2.65739e+08	1.18834e+07	3.07874e+07	4.2147e+07	6.4329e+06	4.08617e+07	204696	2.14546e+07	7.84309e+06	4.73054e+06
Cre/+::Cas9/+ 23	2.25676e+09	1.60788e+08	3.1434e+08	1.44475e+07	9.0143e+07	5.02051e+07	1.11005e+07	4.61289e+07	287601	5.72032e+07	1.3359e+07	7.65148e+06
Cre/+::Cas9/+ 24	2.53461e+09	2.32248e+08	3.20268e+08	1.48968e+07	7.1547e+07	6.24275e+07	1.42664e+07	3.88294e+07	219776	5.26182e+07	1.15359e+07	6.50739e+06
Cre/+::Cas9/+ 25	3.44762e+09	2.74914e+08	3.37775e+08	1.75239e+07	3.91597e+07	3.0148e+07	9.14325e+06	4.53213e+07	459439	2.7364e+07	9.81368e+06	6.23809e+06
Cre/+::Cas9/+ 26	3.45881e+09	2.66005e+08	3.32762e+08	1.57712e+07	4.9221e+07	0	8.27301e+06	4.47877e+07	437404	3.09931e+07	1.05157e+07	6.3304e+06
Cre/+::Cas9/+ 27	3.62269e+09	3.39155e+08	3.28946e+08	1.35302e+07	5.23654e+07	3.38579e+07	8.74707e+06	4.56415e+07	351461	3.416e+07	1.04119e+07	6.76121e+06
Cre/+::+/+ 1	1.15149e+09	8.50142e+07	2.36734e+08	1.19624e+07	2.88942e+07	4.54331e+06	1.82284e+06	4.61663e+07	0	2.35306e+06	5.97996e+06	3.48231e+06
Cre/+::+/+ 2	9.80332e+08	4.59368e+07	2.09187e+08	1.40883e+07	3.02379e+07	7.13314e+06	3.72881e+06	2.9844e+07	0	2.11295e+06	7.26697e+06	4.05984e+06
Cre/+::+/+ 3	1.03395e+09	4.85414e+07	2.29906e+08	8.17159e+06	2.66764e+07	3.84286e+06	1.51041e+06	2.95025e+07	0	1.51629e+06	3.56065e+06	2.41634e+06
Cre/+::+/+ 4	6.12917e+08	2.50503e+07	2.32416e+08	1.00225e+07	3.1927e+07	5.56405e+06	2.17392e+06	3.85321e+07	0	1.89829e+06	4.05711e+06	5.03125e+06
Cre/+::+/+ 5	6.78205e+08	2.84186e+07	2.45344e+08	1.03951e+07	3.50807e+07	6.5523e+06	2.17861e+06	4.55607e+07	0	2.51027e+06	4.84227e+06	5.60694e+06
Cre/+::+/+ 6	6.73825e+08	2.74721e+07	2.05507e+08	1.16329e+07	2.95654e+07	8.93786e+06	1.9042e+06	5.10477e+07	0	3.18559e+06	4.63372e+06	4.89695e+06
Cre/+::+/+ 7	1.44896e+09	9.88864e+07	3.4242e+08	6.47319e+06	2.25525e+07	2.19285e+07	6.5054e+06	7.52574e+07	378492	3.29684e+06	8.26111e+06	8.55032e+06
Cre/+::+/+ 8	2.13667e+09	1.02883e+08	2.85903e+08	2.37786e+07	2.76454e+07	3.20986e+07	1.23999e+07	1.47908e+08	796708	7.22033e+06	1.42758e+07	9.33657e+06
Cre/+::+/+ 9	2.23337e+09	1.07935e+08	3.24469e+08	2.06709e+07	2.07579e+07	2.08336e+07	1.1254e+07	1.65742e+08	818289	7.22376e+06	1.15795e+07	8.47364e+06
Cre/+::+/+ 10	1.77979e+09	1.85011e+08	4.11097e+08	2.64172e+07	0	1.97036e+07	8.55824e+06	3.92811e+07	947020	1.08974e+07	7.45421e+06	5.34212e+06
Cre/+::+/+ 11	1.67462e+09	1.56076e+08	1.82799e+08	8.69299e+06	2.33632e+07	1.53823e+07	6.28635e+06	4.79255e+07	311769	4.96194e+06	7.08722e+06	5.044e+06
Cre/+::+/+ 12	1.30905e+09	8.33546e+07	3.82204e+08	2.00696e+07	3.02924e+07	1.49597e+07	5.71929e+06	4.62057e+07	600049	9.15434e+06	7.04425e+06	4.622e+06
Cre/+::+/+ 13	2.0907e+09	2.70489e+08	4.47907e+08	2.67194e+07	3.96586e+07	2.40886e+07	8.30586e+06	6.18063e+07	655503	0	8.19413e+06	5.77873e+06
Cre/+::+/+ 14	1.84736e+09	2.09908e+08	4.30664e+08	1.97495e+07	2.01471e+07	1.32681e+07	4.63947e+06	5.04893e+07	666289	9.54984e+06	6.45121e+06	4.32824e+06
Cre/+::+/+ 15	1.61507e+09	1.29217e+08	4.28652e+08	1.46881e+07	2.58564e+07	1.28096e+07	4.63494e+06	3.54604e+07	571497	5.89655e+06	5.97293e+06	4.35342e+06
Cre/+::+/+ 16	2.06949e+09	1.63764e+08	3.40601e+08	1.34359e+07	4.25721e+07	3.37164e+07	9.97809e+06	5.13394e+07	519503	2.62124e+07	1.00341e+07	6.35565e+06
Cre/+::+/+ 17	2.14559e+09	1.61207e+08	3.55091e+08	1.36827e+07	6.56803e+07	3.69705e+07	1.05072e+07	5.79732e+07	353415	3.49982e+07	1.27273e+07	8.63487e+06
Cre/+::+/+ 18	1.8804e+09	1.16396e+08	3.38138e+08	1.05772e+07	4.66639e+07	3.16462e+07	7.0182e+06	4.71902e+07	344669	2.48561e+07	9.8084e+06	6.93324e+06
p.value	0.0011662	0.0170028	0.00426961	0.0421588	0.581834	0.116497	0.164338	0.0147535	0.1	0.462292	0.136231	0.484259
FC	1.63902	1.73383	1.15486	1.27377	1.04394	1.3927	1.31775	0.67565	0.1	0.909106	1.24428	1.19845

## Sheet: 9D
	Glu	Glu-sg	GABA	GABA-sg	ACh	Ach-sg	Pro	Pro-sg	Leu	Leu-sg	Gly	Gly-sg	Ala	Ala-sg	Gln	Gln-sg	Cys	Cys-sg	Met	Met-sg	Ser	Ser-sg	His	His-sg
	5.74762	6.09242	5.14216	4.99796	5.27619	5.32955	0.402746	0.543578	-0.13333	0.055762	0.031138	0.515316	-0.46385	0.37176	3.41427	2.58771	0	0	0.382661	0.154237	0.422648	0.285503	0.669069	2.1717
	5.51545	5.82122	4.25411	4.97506	5.09772	5.52125	0.638737	0.991331	-0.06775	0.364038	0.681932	1.29856	0.568678	0.731268	2.78487	2.40829	0	0	0.227381	0.476217	0.703866	0.819053	0.890449	1.43241
	5.59227	5.75272	4.33367	4.51576	5.23398	5.26892	-0.14707	0.240841	-0.24855	-0.09672	-0.21043	0.477948	-0.7351	-0.45517	2.76827	2.41603	0	0	-0.25133	0.086499	-0.32535	0.04925	0.141846	0.601488
	4.83787	6.0364	3.37928	4.89542	5.24964	5.46273	0.147487	0.543348	0.010667	-0.08052	0.323531	0.93446	-0.20974	-0.05411	3.1535	2.87763	0	0	0.072824	0.299397	-0.13704	0.415314	1.19994	0.970012
	4.9839	6.25979	3.56129	5.19378	5.32773	5.45382	0.200146	0.634004	0.146565	-0.04265	0.559396	1.52155	-0.20663	0.443209	3.39522	2.74202	0	0	0.475965	0.224901	0.118194	0.792326	1.35624	0.501887
	4.97455	6.15833	3.59887	5.1521	5.07212	5.46932	0.362451	0.759375	-0.1002	-0.26958	1.00733	0.476893	-0.40085	-0.03696	3.55928	2.77646	0	0	0.819682	-0.19521	0.054684	0.463354	1.16091	0.890549
	5.64122	5.45026	3.99713	4.18129	5.78278	5.77245	0.173802	1.65206	0.040179	1.35261	0.233748	0.804932	0.508319	1.66883	3.04914	1.91473	-0.81	-0.14	0.469909	0.974953	0.38123	2.05823	0.934142	1.74253
	5.47082	5.51255	3.85157	4.25016	5.58497	5.89643	0.607682	0.713755	-0.03989	0.082991	0.565478	0.827038	0.720041	0.838186	3.19105	1.58994		-0.16	0.51118	0.337925	0.706149	0.667169	1.05383	0.507191
	5.53467	5.62287	3.91308	4.21478	5.76752	5.99678	0.40562	0.860633	-0.45326	0.462933	-0.05812	0.635396	0.580157	1.04894	3.35529	1.91547		-0.02	0.511865	0.759581	0.404152	0.808866	0.913922	0.749883
		5.3131		4.33728		5.73659		0.671702		0.12549		0.686468		0.928039		1.6455		-0.89		0.602832		0.654995		0.511892
		4.54789		3.89815		5.17091		0.130668		-0.05216		0.522203		0.836514		1.44627		0.53		-0.37179		0.264565		0.597888
		5.50716		4.31115		5.85097		0.456553		0.343668		0.514174		0.987494		1.94999		0.44		0.589455		0.714603		0.555662
		6.01708		5.03639		5.72332		0.680057		0.13624		2.11742		1.18389		1.89743		0.71		0.884113		0.336365		0.507428
		5.22233		4.60472		5.29635		0.332582		-0.84802		0.298878		0.333991		1.08714				-1.54984		-0.17443		0.395181
		5.97112		4.8752		5.70711		0.638124		-0.10297		0.596466		1.13086		1.93017				0.50852		0.521914		0.478335
Fold_Change	5.36649	5.68568	4.00346	4.62928	5.37696	5.5771	0.310178	0.656574	-0.0939523	0.0954068	0.348223	0.81518	0.0401139	0.663783	3.18566	2.07899	-0.115714	0.0113333	0.357793	0.252119	0.258726	0.578471	0.924483	0.840936
p.value		0.0617911		0.00907477		0.0903168		0.0103419		0.171693		0.0179807		0.0160445		1.12147e-06		0.419544		0.584888		0.0830714		0.649293

## Sheet: 9E
Cre/+::+/+	Cre/+::Cas9/+
395.38	446.98
401.61	438.86
391.26	422.66
292.21	475.8
291.57	493.63
290.32	488.47
340.68	322.86
318.78	326.49
322.26	354.85
378.88	288.48
356.88	286.33
317.44	341.61
410.95	394.07
384.42	385.73
348.95	386.53
410.37	488.03
409.87	486.12
380.01	426.39
	444.02
	464.37
	446.96
	427.05
	412
	437.79
	531.79
	516.66
	526.15

## Sheet: 9F
Cre/+::+/+	Cre/+::Cas9/+
48.52	67.91
45.79	64.43
43.82	52.06
24.92	58
26.52	71.78
25.46	68.38
59.72	68.53
52.02	66.86
51.32	76.59
96.16	67.29
74.58	70.53
44.31	89.04
132.58	111.33
103.75	103.6
65.61	97.68
128.84	173.21
122.38	156.65
87.32	69.7
	90.04
	125.28
	101.74
	150.01
	115.39
	169.36
	210.19
	195.68
	248.08

## Sheet: 9G
Cre/+::+/+	Cre/+::Cas9/+
4.3	4.46
3.8	5.1
4.18	4.28
4.22	4.9
4.46	4.87
3.73	4.92
5.96	5.92
5.2	6.45
5.9	6.92
7.48	5.77
3.32	3.9
6.95	6.25
8.15	5.72
7.84	4.25
7.8	5.66
6.19	9.55
6.46	9.42
6.15	9.26
	6.34
	6.46
	6.02
	4.83
	5.72
	5.82
	6.14
	6.05
	5.98

## Sheet: 9H
Cre/+::+/+	Cre/+::Cas9/+
27.86	19.37
26.98	18.93
25.86	20.47
36.12	24.28
38.93	23.38
46.53	23.01
46.65	22.19
51.13	16.45
55.9	21.15
23.26	17.44
26.65	21.86
28.65	22.16
34.96	21.03
29.16	16.54
20.87	20.75
25.08	21.68
27.31	21.55
23.09	20.39
	28.1
	23.03
	23.06
	19.49
	21
	17.08
	21.81
	20.92
	20.36

## Sheet: 9I
Cre/+::+/+	Cre/+::Cas9/+
8.89732	9.89934
12.9265	13.6069
6.07647	7.76588
7.63418	10.0292
8.50265	12.1297
7.73564	9.69794
7.34499	22.707
9.17245	8.79944
7.22985	9.92497
6.21874	8.19675
5.58935	8.76596
5.88179	9.24295
6.37477	7.20819
5.21048	6.92096
4.70773	7.77734
7.89401	7.42977
9.66225	5.25434
7.3583	5.07592
	5.76748
	7.92048
	6.13855
	6.06565
	9.5868
	8.41243
	7.50314
	7.73568
	7.61592
