# Supplementary material for: Importance of glutamine in synaptic vesicles revealed by functional studies of SLC6A17 and its mutations pathogenic for intellectual disability
Source: eLife. 2023 Jul 13;12:RP86972. doi: 10.7554/eLife.86972 (PMC10393021; doi:10.7554/eLife.86972)
Supplement: Supplementary file 2. — Sequence information file for pAAV-hSyn-SLC6A17-HA-WPRE-pA. [file elife-86972-supp2.xlsx]

## Sheet: Sheet1
Region	Density	Region	Density
Main Olfactory bulb		Amygdala cortical transition zone	+
Glomerular Layer（GrO）	+++	Amygdalopiriform transition area	+
Mitral Layer（Mi）	+++	Amygdalohippocampal Area	+
Granule Layer（GI）	+++	Amygdalostriatal transition area	+
Accessory Olfactory Bulb	++	Hippcampal Formation
Anterior Olfactory nucleus（AON）	+++	CA1	+
Cerebral Cortex		CA2	+
Orbital cortex	+++	CA3	++
Claustrum	+	Dentate gyrus	+++
Frontal cortex	++	Subiculum	++
Insular cortex	++	Presubiculum	+
Motor cortex	++	Basal ganglia and septum
Cingulate cortex	++	Nucleus Accumbens	+
Somatosensory cortex	+++	Caudate-Putamen	+
Parietal cortex	++	Globus Pallidus	+
Occipital cortex	++	Lateral septal nucleus	++
Temporal cortex	++	Medial septal nucleus	0
Retrosplenial agranular cortex	++	Islands of Calleja	++
Retrosplenial granular cortex	++	Nucleus of the diagonal band	+
Entorhinal cortex	++	Thalamus
Auditory cortex	++	Angular thalamic nucleus	+
Visual cortex	++	Anterodorsal thalamic nucleus	++
Ectorhinal cortex	+	Anteromedial thalamic nucleus	+++
Piriform cortex	++	Anteroventral thalamic nucleus	++
Perirhinal cortex	+	Central medial thalamic nucleus	+
Amygdala and extended amygdala		Interanterodorsal thalamic nucleus	+
Anterior amygdaloid area	+	Lateral Geniculate nucleus	+++
Cortical amygdaloid nucleus	++	Medial Geniculate nucleus	++
Basolateral amygdaloid nucleus	+++	Laterodorsal thalamic nucleus	++
Central amygdaloid nucleus	+	Lateral posterior thalamic nucleus	++
Medial amygdaloid nucleus	+++	Mediodorsal thalamic nucleus	+
Bed n. stria terminalis	++	Posterior thalamic nuclear group	++
Lateral Amygdaloid nucleus	+	Paraventricular thalamic nucleus	+++
Reticular thalamic nucleus	++	Periaqueductal Gray	+
Reuniens thalamic nucleus	+	Superior Colliculus,	++
Ventral posterolateral nucleus	+++	Deep mesencephalic nucleus	0
Ventral posteromedial nucleus	+++	Inferior Colliculus	++
ventral anterior thalamic nucleus	++	Ventral Tegemental Area	0
ventrolateral thalamic nucleus	++	Medulla
Lateral habenula	+	Ventral Cochlear Nucleus	+++
Medial habenula	+	Locus coeruleus
Subthalamic nucleus	+	Vestibular nuclei	++
Zona incerta	+	Cuneatus nucleus	++
Subfornical organ	++	Solitary tract nucleus	+
Hypothalamus		Pontine reticular nucleus	+
Median preoptic nucleus	+	Superior olive	++
Lateral preoptic area	0	Facial nucleus	0
Medial preoptic area	++	Inferior olive	++
Anterior hypothalamic area	+	Principal sensory trigeminal nucleus	++
Suprachiasmatic nucleus	+++	Lateral reticular nucleus	+++
Supraoptic nucleus	++	Nucleus X	+
Paraventricular hypothalamic nucleus	+++	Parvicellular reticular nucleus	+
Lateral hypothalamic area	++	Nucleus of the trapezoid body	++
Ventromedial hypothalamic nucleus	++	Cerebellum
Dorsomedial hypothalamic nucleus	+	Granule cell laye	+++
Arcuate nucleus	++	Purkinje cell layer	+++
Posterior hypothalamic area	++	Molecular cell laye	++
Supramammillary nucleus	+	deep cerebellar nuclei	+
Medial mammillary nucleus	++	Midbrain,Pons
Hindbrain		Interpeduncular Nucleus	+
Substantia nigra	0	Dorsal Raphe Nucleus	++
Pontine nuclei	+++	Median Raphe	+
Lateral parabrachial Nucleus	++	Pedunculopontine Tegmental	0
Lateral lemniscus	+
Reticulotegmental nucleus of the pons	++
