# Supplementary figures and images for: Importance of glutamine in synaptic vesicles revealed by functional studies of SLC6A17 and its mutations pathogenic for intellectual disability
Source: eLife journal article supplement (doi:10.7554/elife.86972), 2023-04-05

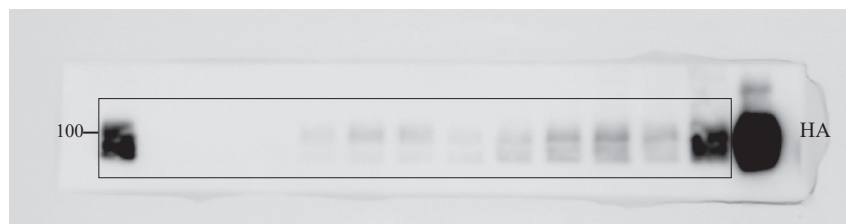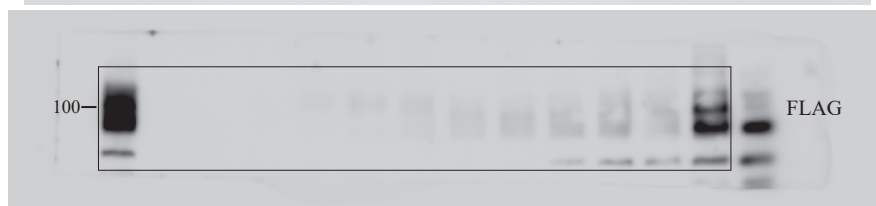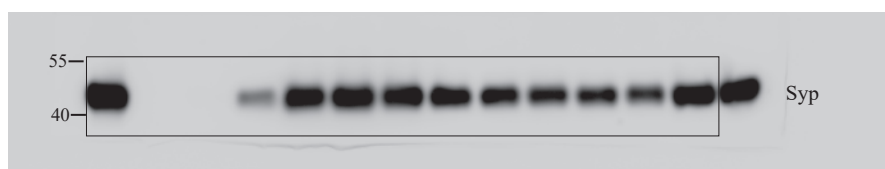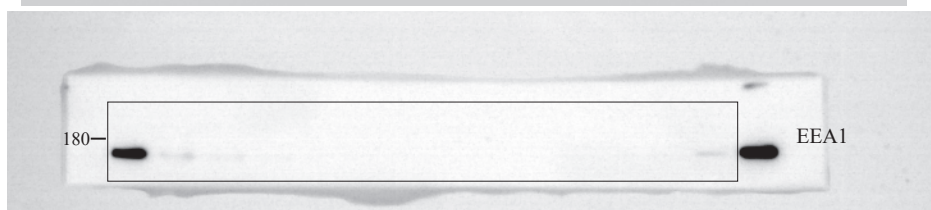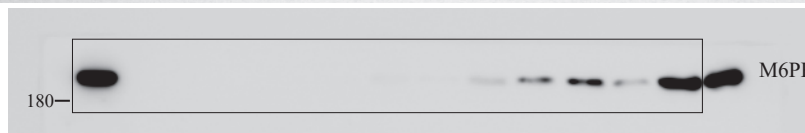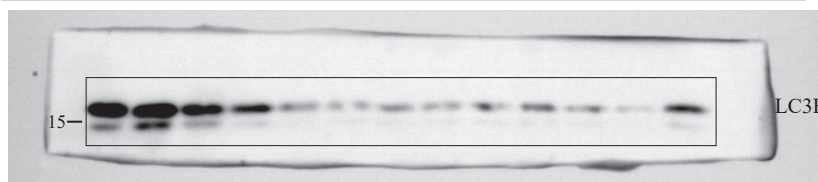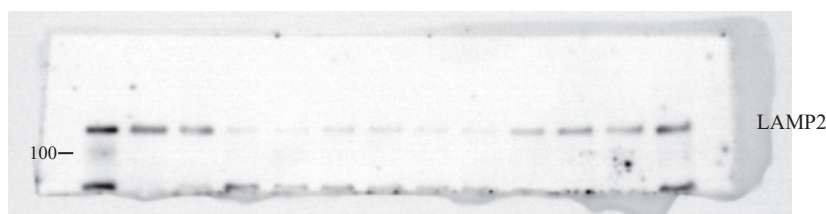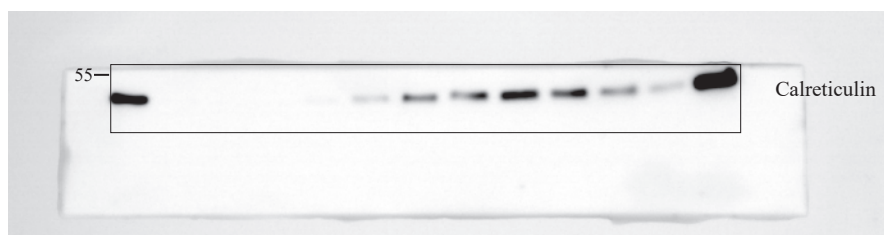

Supplement: fig3-figsupp1-data2 [file FigureS2D-Source Data-WB.pdf › FigureS2D-Source Data-WB.pdf]

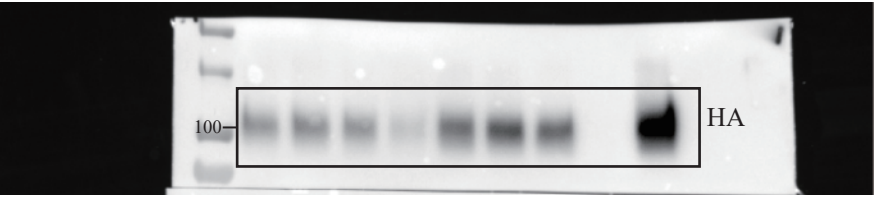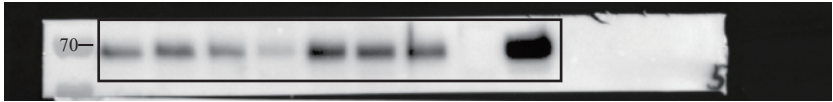

Synaptotagmin1

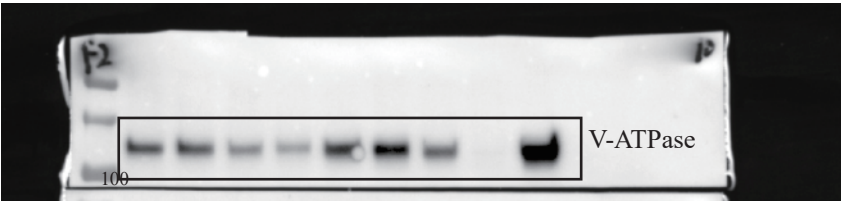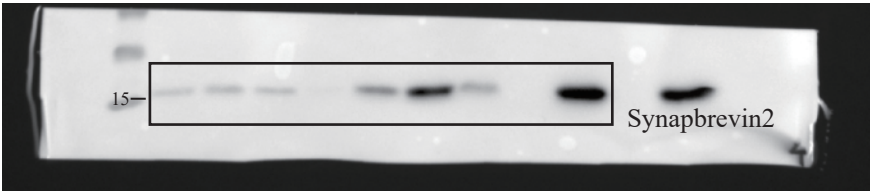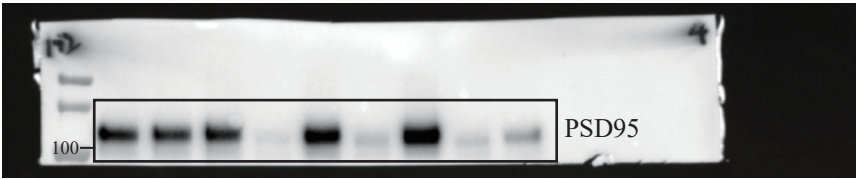

Supplement: fig4-figsupp1-data2 [file FigureS5C-Source Data-WB.pdf › FigureS5C-Source Data-WB.pdf]

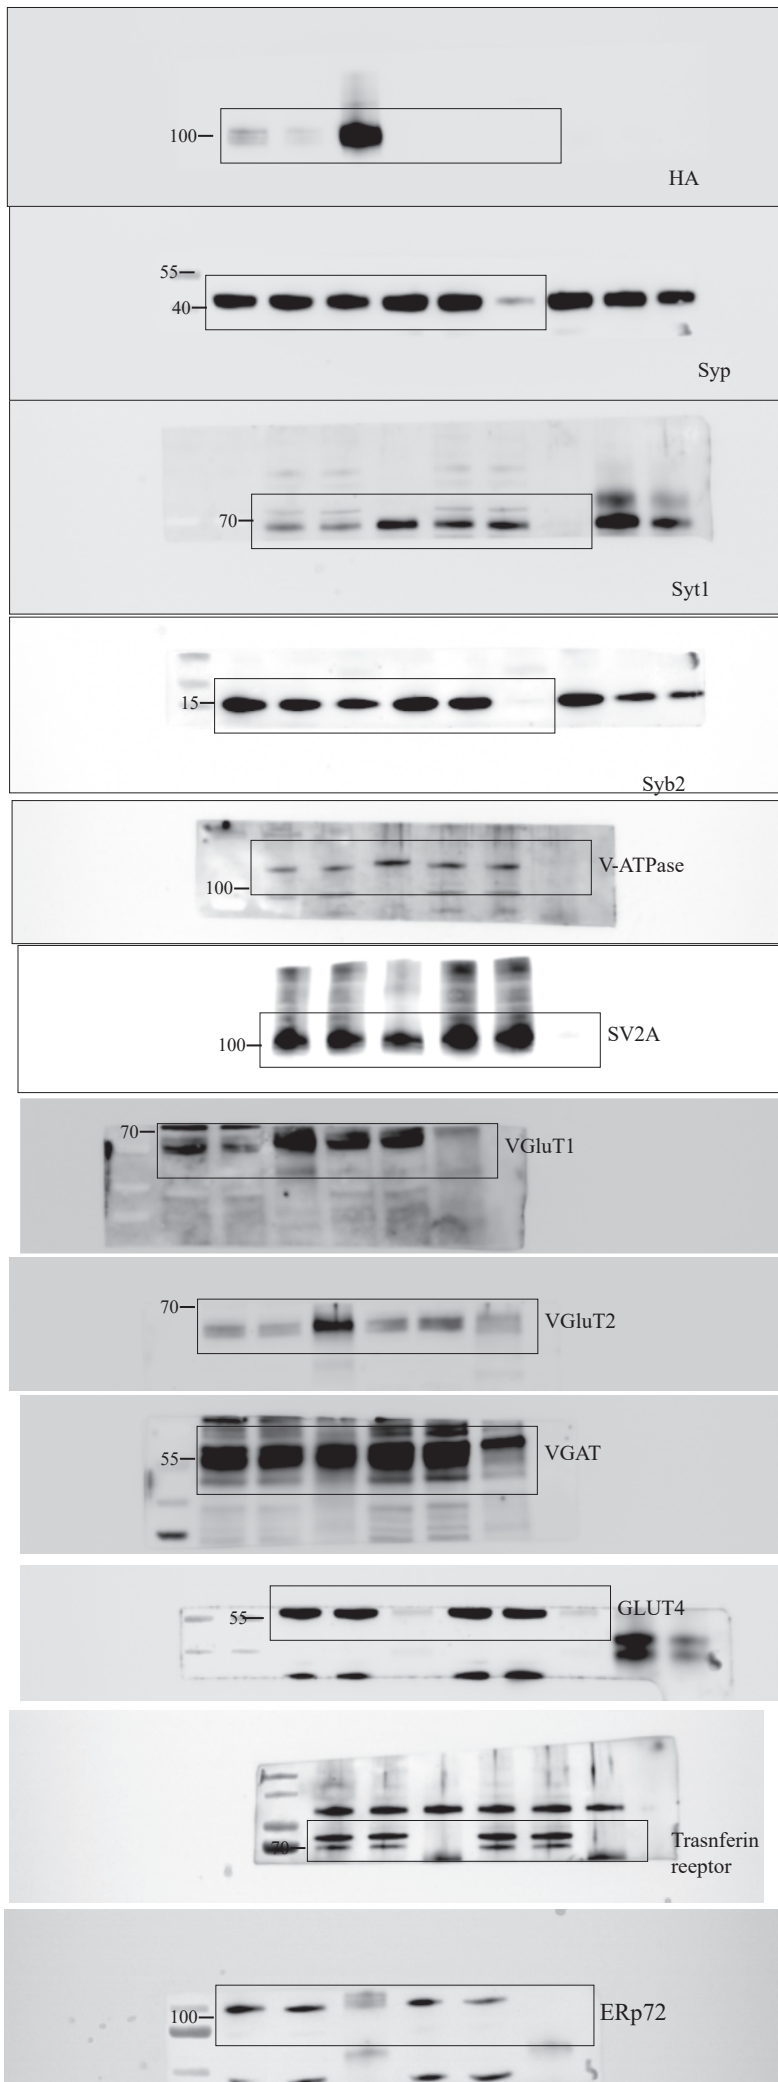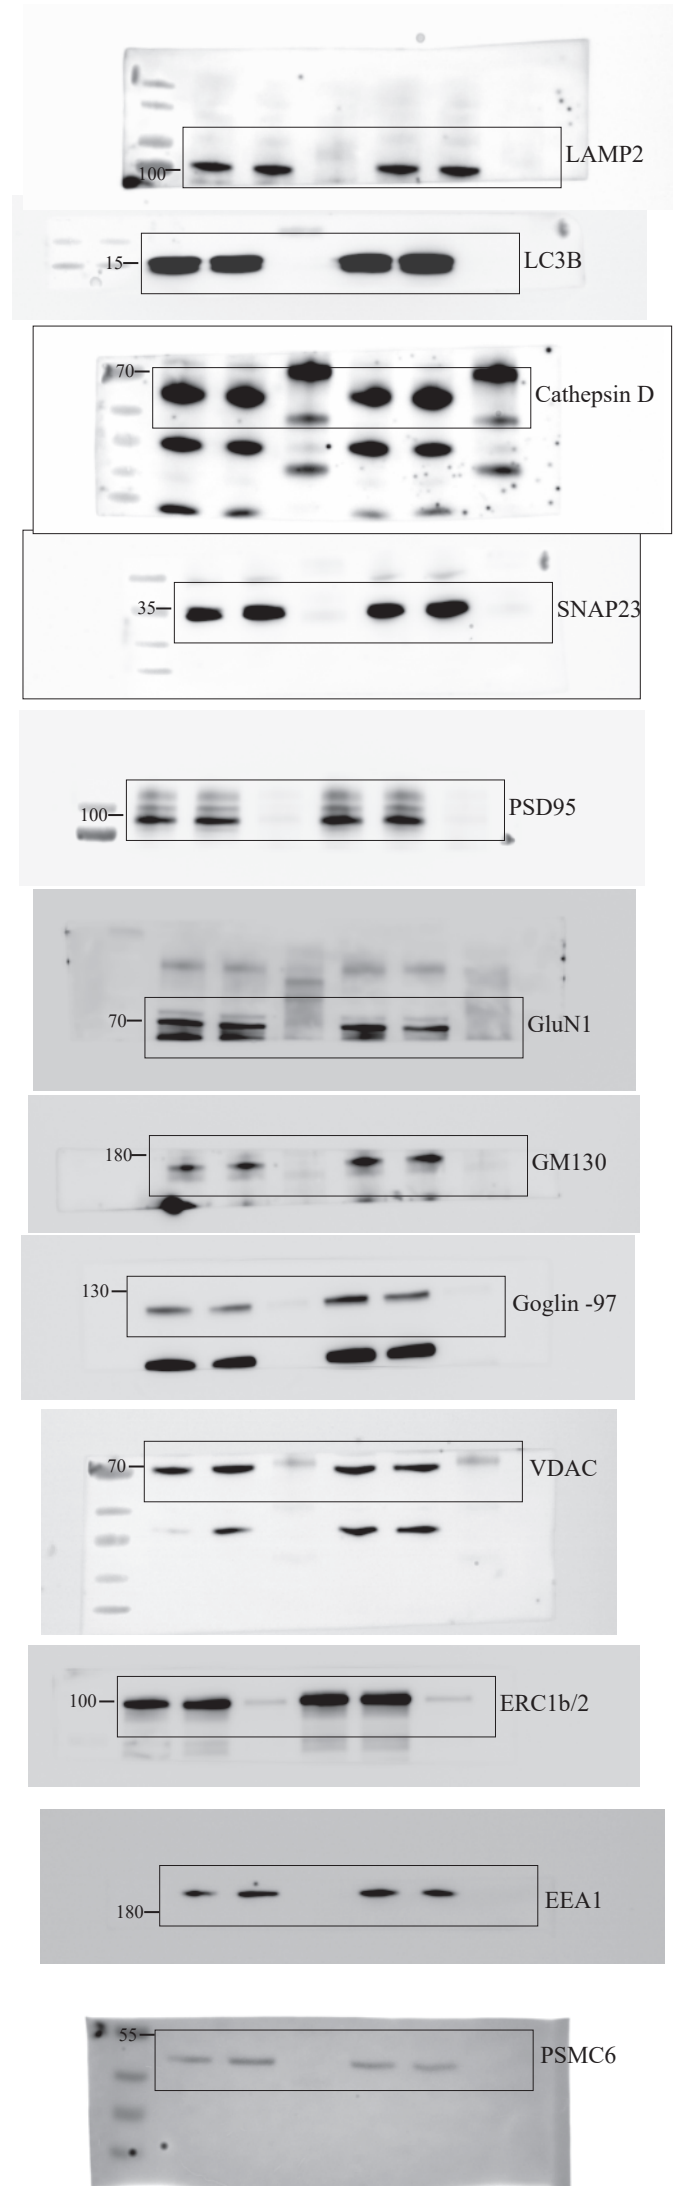

Supplement: fig4-figsupp1-data2 [file FigureS5D-Source Data-WB.pdf › FigureS5D-Source Data-WB.pdf]

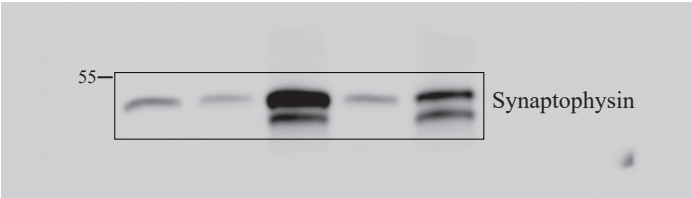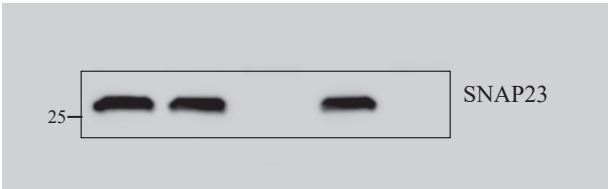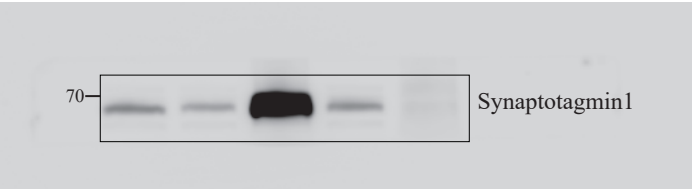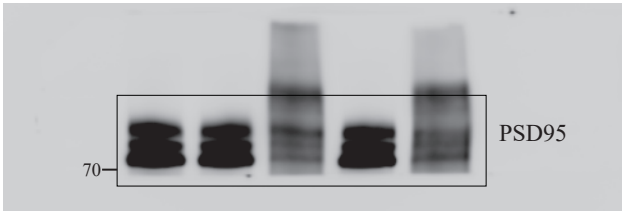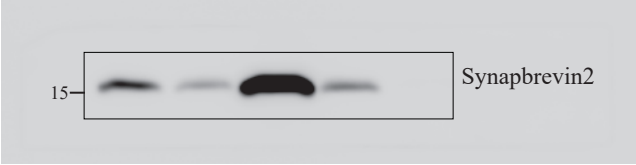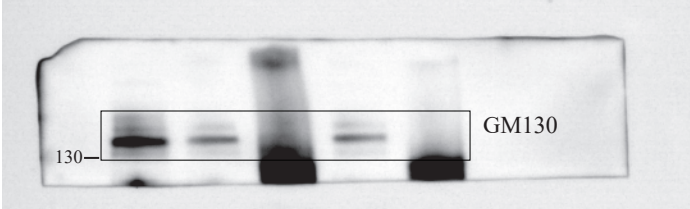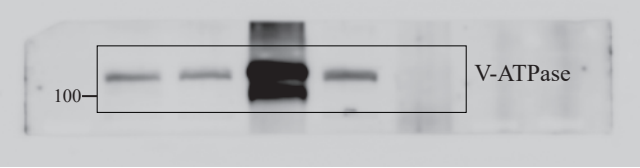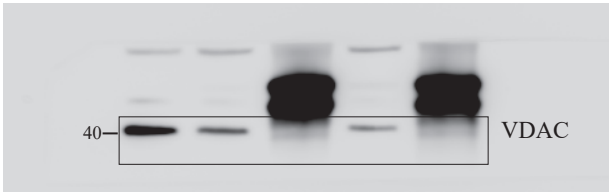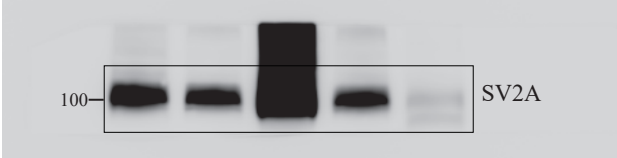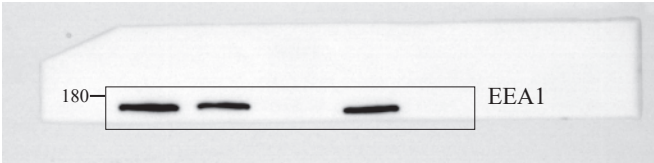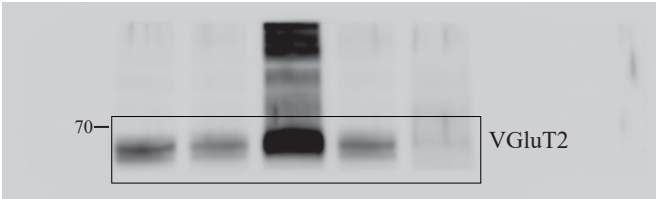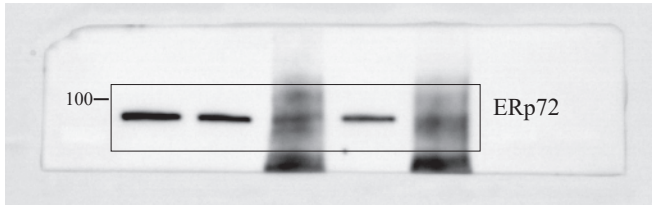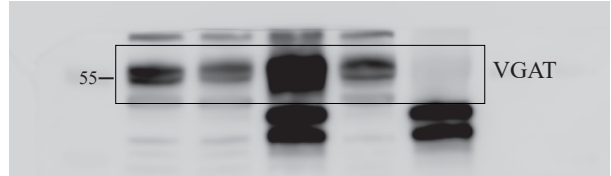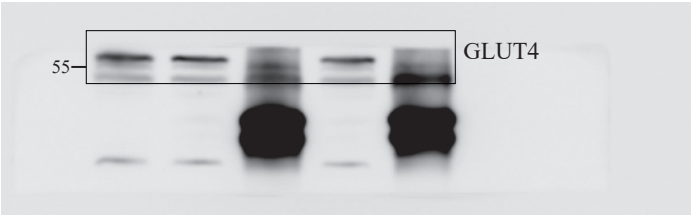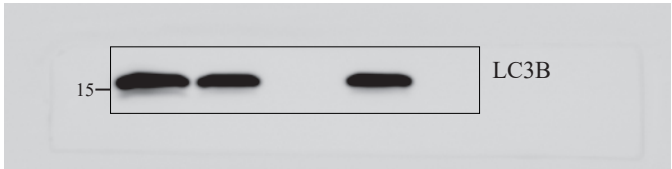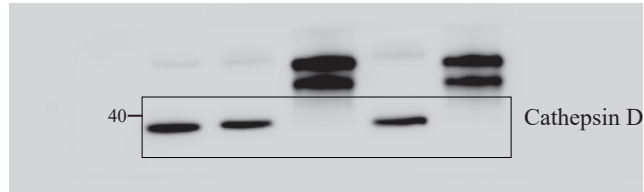

Supplement: fig5-figsupp1-data2 [file FigureS8A-Source Data-WB.pdf › FigureS8A-Source Data-WB.pdf]

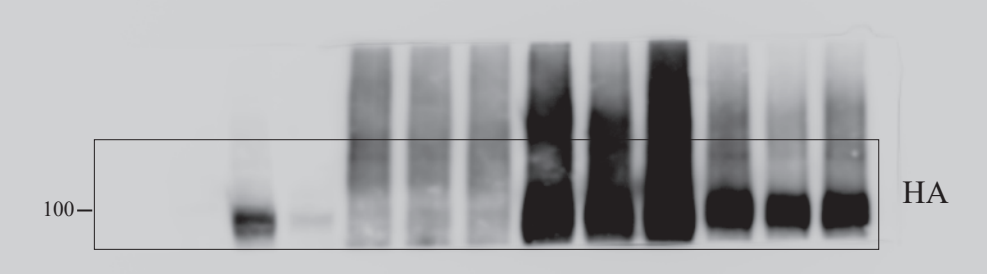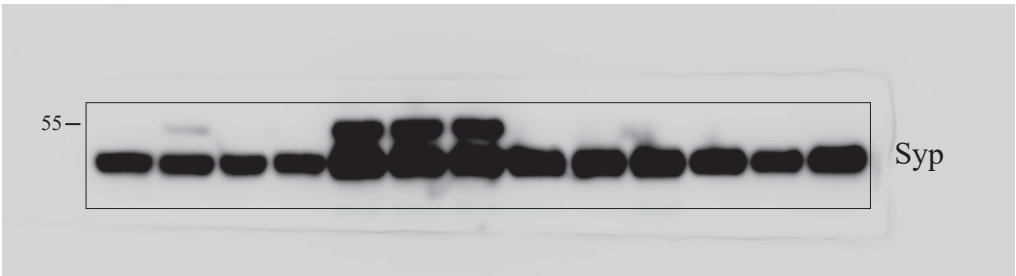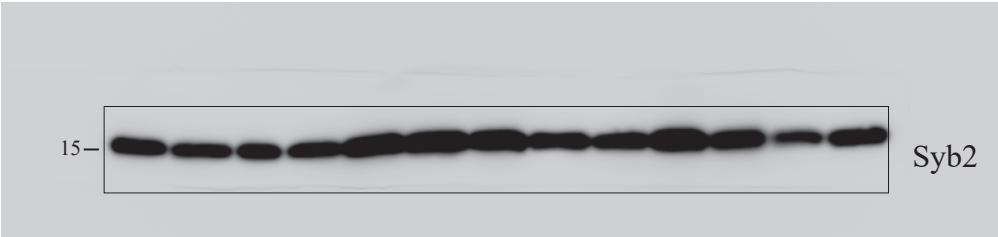

Supplement: fig7-figsupp1-data2 [file FigureS9A-Source Data-WB.pdf › FigureS9A-Source Data-WB.pdf]

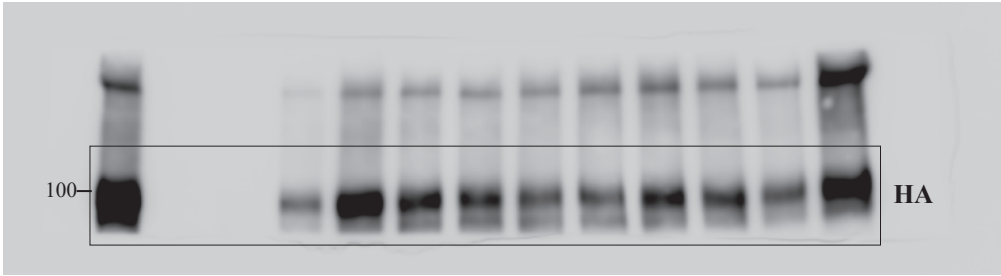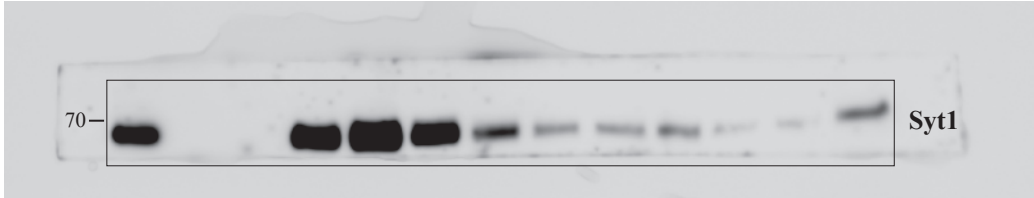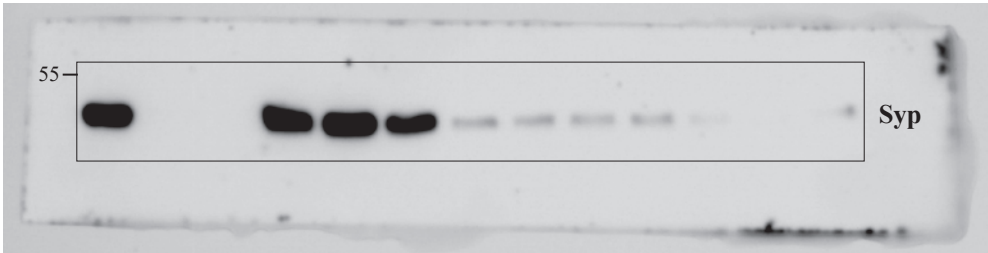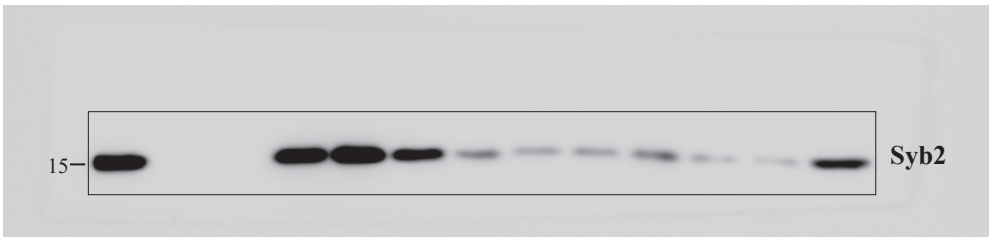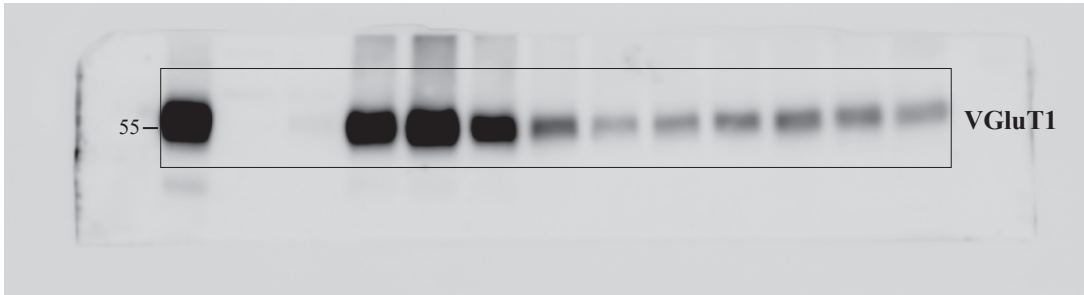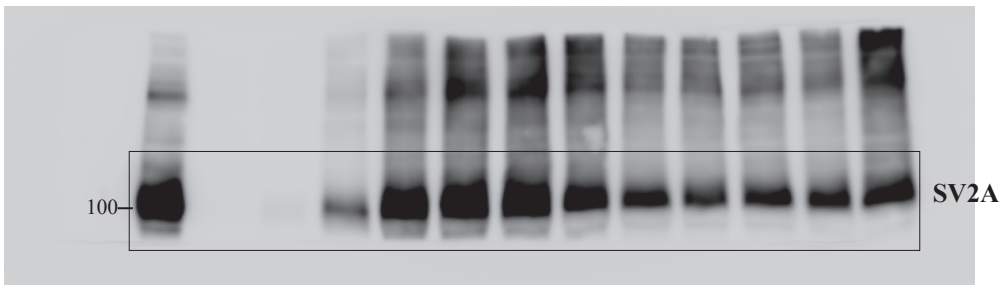

Supplement: fig7-figsupp1-data2 [file FigureS9E-Source Data-WB.pdf › FigureS9E-Source Data-WB.pdf]

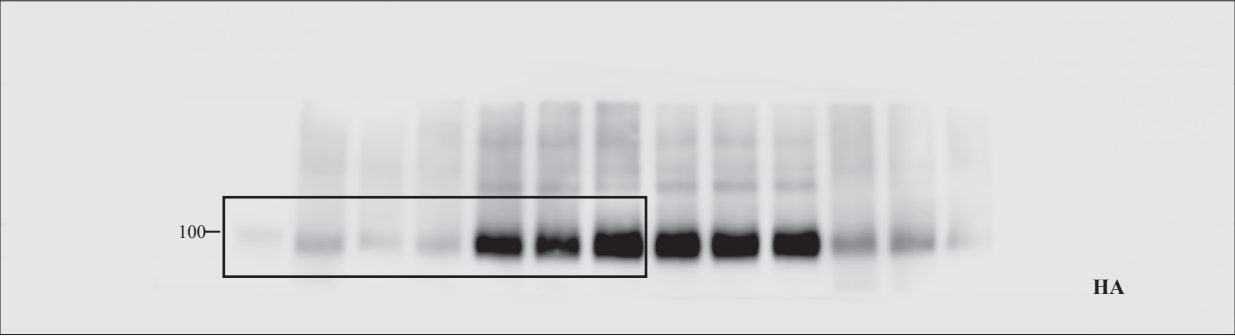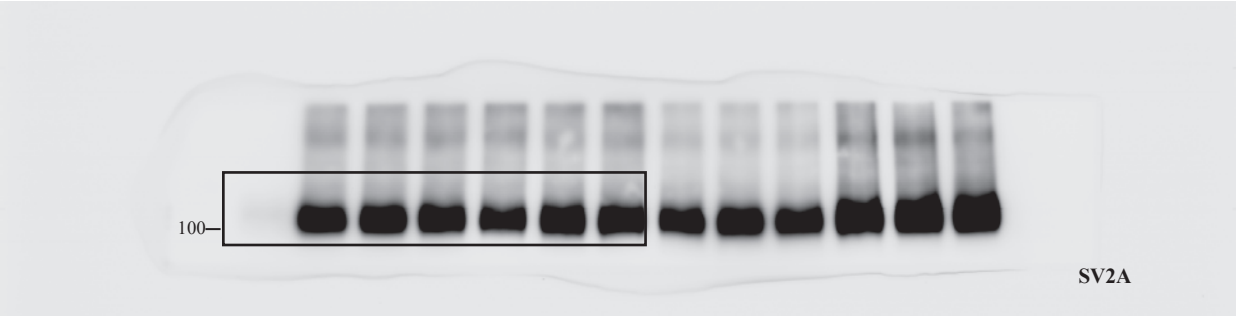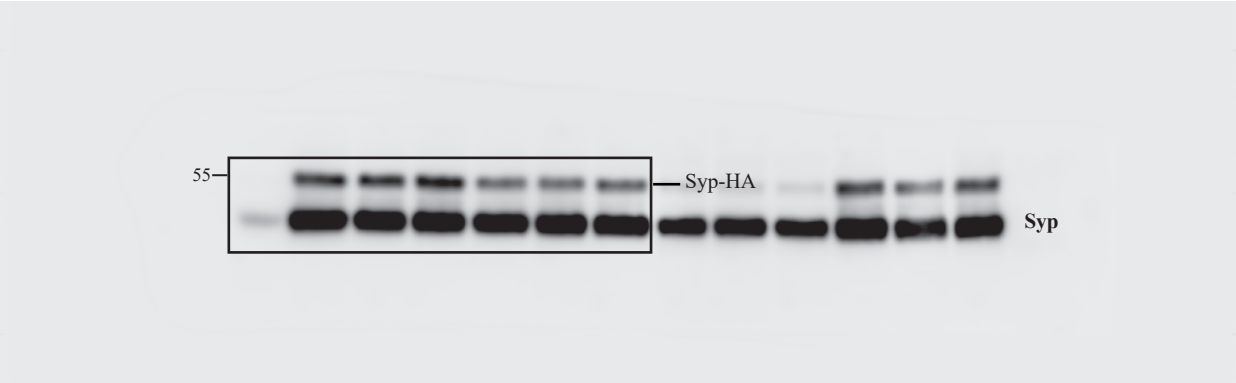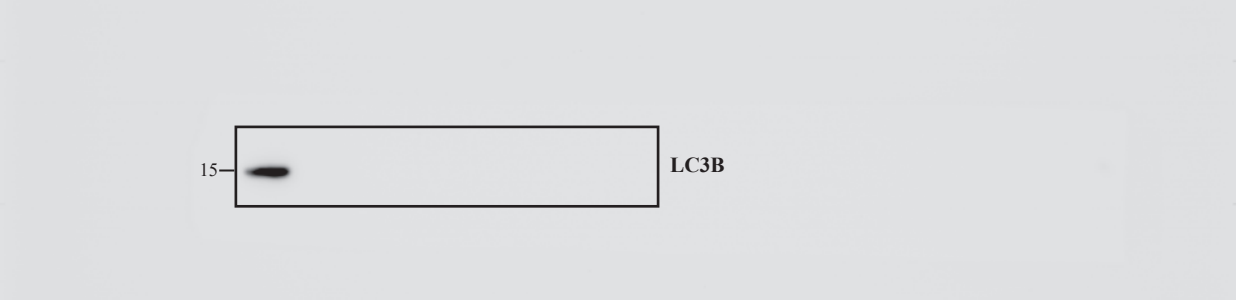

Supplement: fig9-data3 [file elife-86972-fig9-data3-v1.zip]
